# Supplementary material
Source: publisher figshare collection journal article supplement (https://acs.figshare.com/ndownloader/files/6523455)
Supplement: Supplementary file 1 [file 6523455]

 
data_ClHf(NCy2)3 (1-Hf)
 
_audit_creation_method            'SHELXL-2014/7'
_shelx_SHELXL_version_number      '2014/7'
_chemical_name_systematic         ?
_chemical_name_common             ?
_chemical_melting_point           ?
_chemical_formula_moiety          ?
_chemical_formula_structural
 'HfCl(N(C6H11)2)3'
_chemical_formula_sum
 'C36 H66 Cl Hf N3' 
_chemical_formula_weight          754.85

loop_
 _atom_type_symbol
 _atom_type_description
 _atom_type_scat_dispersion_real
 _atom_type_scat_dispersion_imag
 _atom_type_scat_source
 'C'  'C'   0.0033   0.0016
 'International Tables Vol C Tables 4.2.6.8 and 6.1.1.4'
 'H'  'H'   0.0000   0.0000
 'International Tables Vol C Tables 4.2.6.8 and 6.1.1.4'
 'N'  'N'   0.0061   0.0033
 'International Tables Vol C Tables 4.2.6.8 and 6.1.1.4'
 'Cl'  'Cl'   0.1484   0.1585
 'International Tables Vol C Tables 4.2.6.8 and 6.1.1.4'
 'Hf'  'Hf'  -0.5830   6.1852
 'International Tables Vol C Tables 4.2.6.8 and 6.1.1.4'
 
_space_group_crystal_system       triclinic
_space_group_IT_number            2
_space_group_name_H-M_alt         'P -1'
_space_group_name_Hall            '-P 1'
 
_shelx_space_group_comment
;
The symmetry employed for this shelxl refinement is uniquely defined
by the following loop, which should always be used as a source of
symmetry information in preference to the above space-group names.
They are only intended as comments.
;
 
loop_
 _space_group_symop_operation_xyz
 'x, y, z'
 '-x, -y, -z'
 
_cell_length_a                    9.7839(3)
_cell_length_b                    10.4952(3)
_cell_length_c                    39.8958(11)
_cell_angle_alpha                 86.2460(14)
_cell_angle_beta                  83.4103(13)
_cell_angle_gamma                 62.6492(13)
_cell_volume                      3614.28(19)
_cell_formula_units_Z             4
_cell_measurement_temperature     100(2)
_cell_measurement_reflns_used     9856
_cell_measurement_theta_min       2.25
_cell_measurement_theta_max       29.63
 
_exptl_crystal_description        stick     
_exptl_crystal_colour             colourless
_exptl_crystal_density_meas       ?
_exptl_crystal_density_method     ?
_exptl_crystal_density_diffrn     1.387          
_exptl_crystal_F_000              1568
_exptl_transmission_factor_min    ?
_exptl_transmission_factor_max    ?
_exptl_crystal_size_max           0.160
_exptl_crystal_size_mid           0.060
_exptl_crystal_size_min           0.040
_exptl_absorpt_coefficient_mu     2.987
_shelx_estimated_absorpt_T_min    0.646
_shelx_estimated_absorpt_T_max    0.890
_exptl_absorpt_correction_type    numerical
_exptl_absorpt_correction_T_min   0.6159
_exptl_absorpt_correction_T_max   0.8995
_exptl_absorpt_process_details    'SADABS-2014/2 (Sheldrick)'
_exptl_absorpt_special_details
;
 numerical absorption correction followed by correction based on
 symmetry-related measurements (multi-scan)
;
_diffrn_ambient_temperature       100(2)
_diffrn_radiation_wavelength      0.71073
_diffrn_radiation_type            MoK\a
_diffrn_source                    'sealed tube'
_diffrn_measurement_device_type   'Bruker APEX-II CCD'
_diffrn_measurement_method        '\f and \w scans'
_diffrn_detector_area_resol_mean  ?
_diffrn_reflns_number             127478
_diffrn_reflns_av_unetI/netI      0.0362
_diffrn_reflns_av_R_equivalents   0.0499
_diffrn_reflns_limit_h_min        -13
_diffrn_reflns_limit_h_max        13
_diffrn_reflns_limit_k_min        -14
_diffrn_reflns_limit_k_max        14
_diffrn_reflns_limit_l_min        -56
_diffrn_reflns_limit_l_max        56
_diffrn_reflns_theta_min          1.542
_diffrn_reflns_theta_max          30.034
_diffrn_reflns_theta_full         25.242
_diffrn_measured_fraction_theta_max   1.000
_diffrn_measured_fraction_theta_full  1.000
_diffrn_reflns_Laue_measured_fraction_max    1.000
_diffrn_reflns_Laue_measured_fraction_full   1.000
_diffrn_reflns_point_group_measured_fraction_max   1.000
_diffrn_reflns_point_group_measured_fraction_full  1.000
_reflns_number_total              21147
_reflns_number_gt                 17910
_reflns_threshold_expression      'I > 2\s(I)'
_reflns_Friedel_coverage          0.000
_reflns_Friedel_fraction_max      .
_reflns_Friedel_fraction_full     .
 
_reflns_special_details
;
 Reflections were merged by SHELXL according to the crystal
 class for the calculation of statistics and refinement.
 
 _reflns_Friedel_fraction is defined as the number of unique
 Friedel pairs measured divided by the number that would be
 possible theoretically, ignoring centric projections and
 systematic absences.
;
 
_computing_data_collection        'Bruker APEX2'
_computing_cell_refinement        'Bruker SAINT V8.34A'
_computing_data_reduction         'Bruker SAINT V8.34A'
_computing_structure_solution     'SHELXS-2013/1 (Sheldrick, 2013)'
_computing_structure_refinement 'SHELXL-2014/7 (Sheldrick, 2014)'
_computing_molecular_graphics     ?
_computing_publication_material   ?
_refine_special_details           ?
_refine_ls_structure_factor_coef  Fsqd
_refine_ls_matrix_type            full
_refine_ls_weighting_scheme       calc
_refine_ls_weighting_details
'w=1/[\s^2^(Fo^2^)+(0.0200P)^2^+10.0000P] where P=(Fo^2^+2Fc^2^)/3'
_atom_sites_solution_primary      direct
_atom_sites_solution_secondary    difmap
_atom_sites_solution_hydrogens    difmap
_refine_ls_hydrogen_treatment     constr
_refine_ls_extinction_method      none
_refine_ls_extinction_coef        .
_refine_ls_number_reflns          21147
_refine_ls_number_parameters      784
_refine_ls_number_restraints      0
_refine_ls_R_factor_all           0.0503
_refine_ls_R_factor_gt            0.0384
_refine_ls_wR_factor_ref          0.0769
_refine_ls_wR_factor_gt           0.0737
_refine_ls_goodness_of_fit_ref    1.137
_refine_ls_restrained_S_all       1.137
_refine_ls_shift/su_max           0.002
_refine_ls_shift/su_mean          0.000
 
loop_
 _atom_site_label
 _atom_site_type_symbol
 _atom_site_fract_x
 _atom_site_fract_y
 _atom_site_fract_z
 _atom_site_U_iso_or_equiv
 _atom_site_adp_type
 _atom_site_occupancy
 _atom_site_site_symmetry_order  
 _atom_site_calc_flag
 _atom_site_refinement_flags_posn
 _atom_site_refinement_flags_adp
 _atom_site_refinement_flags_occupancy
 _atom_site_disorder_assembly
 _atom_site_disorder_group
Hf1 Hf 0.38055(2) 0.35281(2) 0.13442(2) 0.01197(3) Uani 1 1 d . . . . .
Cl1 Cl 0.37417(10) 0.15479(9) 0.16709(2) 0.02023(16) Uani 1 1 d . . . . .
N1 N 0.4442(3) 0.2960(3) 0.08494(7) 0.0155(5) Uani 1 1 d . . . . .
N2 N 0.1642(3) 0.5170(3) 0.13981(7) 0.0137(5) Uani 1 1 d . . . . .
N3 N 0.5324(3) 0.3985(3) 0.15495(7) 0.0135(5) Uani 1 1 d . . . . .
C1 C 0.5391(4) 0.3253(4) 0.05715(9) 0.0181(7) Uani 1 1 d . . . . .
H1 H 0.4898 0.3353 0.0359 0.022 Uiso 1 1 calc R U . . .
C2 C 0.5366(4) 0.4691(4) 0.06327(10) 0.0242(8) Uani 1 1 d . . . . .
H2A H 0.5758 0.4648 0.0853 0.029 Uiso 1 1 calc R U . . .
H2B H 0.4285 0.5459 0.0643 0.029 Uiso 1 1 calc R U . . .
C3 C 0.6348(5) 0.5070(5) 0.03557(11) 0.0310(9) Uani 1 1 d . . . . .
H3A H 0.5872 0.5250 0.0141 0.037 Uiso 1 1 calc R U . . .
H3B H 0.6368 0.5961 0.0416 0.037 Uiso 1 1 calc R U . . .
C4 C 0.8003(5) 0.3863(5) 0.03085(10) 0.0311(9) Uani 1 1 d . . . . .
H4A H 0.8588 0.4108 0.0118 0.037 Uiso 1 1 calc R U . . .
H4B H 0.8524 0.3753 0.0515 0.037 Uiso 1 1 calc R U . . .
C5 C 0.7995(5) 0.2456(5) 0.02375(11) 0.0342(10) Uani 1 1 d . . . . .
H5A H 0.9070 0.1677 0.0216 0.041 Uiso 1 1 calc R U . . .
H5B H 0.7553 0.2544 0.0021 0.041 Uiso 1 1 calc R U . . .
C6 C 0.7048(4) 0.2070(4) 0.05199(10) 0.0244(8) Uani 1 1 d . . . . .
H6A H 0.7040 0.1169 0.0464 0.029 Uiso 1 1 calc R U . . .
H6B H 0.7541 0.1905 0.0733 0.029 Uiso 1 1 calc R U . . .
C7 C 0.3808(4) 0.1963(4) 0.07769(9) 0.0189(7) Uani 1 1 d . . . . .
H7 H 0.2910 0.2174 0.0950 0.023 Uiso 1 1 calc R U . . .
C8 C 0.4910(4) 0.0352(4) 0.08203(11) 0.0265(8) Uani 1 1 d . . . . .
H8A H 0.5782 0.0057 0.0641 0.032 Uiso 1 1 calc R U . . .
H8B H 0.5340 0.0184 0.1041 0.032 Uiso 1 1 calc R U . . .
C9 C 0.4057(5) -0.0559(5) 0.08009(12) 0.0347(10) Uani 1 1 d . . . . .
H9A H 0.4791 -0.1588 0.0824 0.042 Uiso 1 1 calc R U . . .
H9B H 0.3230 -0.0310 0.0989 0.042 Uiso 1 1 calc R U . . .
C10 C 0.3358(6) -0.0297(6) 0.04691(12) 0.0456(13) Uani 1 1 d . . . . .
H10A H 0.2756 -0.0839 0.0468 0.055 Uiso 1 1 calc R U . . .
H10B H 0.4197 -0.0656 0.0283 0.055 Uiso 1 1 calc R U . . .
C11 C 0.2304(5) 0.1294(6) 0.04090(11) 0.0408(12) Uani 1 1 d . . . . .
H11A H 0.1393 0.1623 0.0578 0.049 Uiso 1 1 calc R U . . .
H11B H 0.1932 0.1430 0.0183 0.049 Uiso 1 1 calc R U . . .
C12 C 0.3151(5) 0.2208(5) 0.04334(9) 0.0285(9) Uani 1 1 d . . . . .
H12A H 0.4003 0.1946 0.0250 0.034 Uiso 1 1 calc R U . . .
H12B H 0.2423 0.3235 0.0405 0.034 Uiso 1 1 calc R U . . .
C13 C 0.0474(4) 0.6194(4) 0.11817(8) 0.0149(6) Uani 1 1 d . . . . .
H13 H -0.0541 0.6636 0.1323 0.018 Uiso 1 1 calc R U . . .
C14 C 0.0291(5) 0.5435(4) 0.08891(11) 0.0295(9) Uani 1 1 d . . . . .
H14A H -0.0012 0.4689 0.0979 0.035 Uiso 1 1 calc R U . . .
H14B H 0.1292 0.4956 0.0750 0.035 Uiso 1 1 calc R U . . .
C15 C -0.0941(5) 0.6507(5) 0.06690(11) 0.0342(10) Uani 1 1 d . . . . .
H15A H -0.0998 0.5999 0.0475 0.041 Uiso 1 1 calc R U . . .
H15B H -0.1962 0.6906 0.0803 0.041 Uiso 1 1 calc R U . . .
C16 C -0.0590(5) 0.7711(4) 0.05415(10) 0.0308(9) Uani 1 1 d . . . . .
H16A H -0.1448 0.8413 0.0416 0.037 Uiso 1 1 calc R U . . .
H16B H 0.0362 0.7327 0.0384 0.037 Uiso 1 1 calc R U . . .
C17 C -0.0373(5) 0.8464(4) 0.08275(10) 0.0249(8) Uani 1 1 d . . . . .
H17A H -0.1368 0.8964 0.0968 0.030 Uiso 1 1 calc R U . . .
H17B H -0.0054 0.9193 0.0733 0.030 Uiso 1 1 calc R U . . .
C18 C 0.0856(4) 0.7393(4) 0.10493(10) 0.0236(8) Uani 1 1 d . . . . .
H18A H 0.1877 0.6978 0.0916 0.028 Uiso 1 1 calc R U . . .
H18B H 0.0922 0.7905 0.1242 0.028 Uiso 1 1 calc R U . . .
C19 C 0.1067(4) 0.5217(3) 0.17611(8) 0.0132(6) Uani 1 1 d . . . . .
H19 H 0.1981 0.4571 0.1884 0.016 Uiso 1 1 calc R U . . .
C20 C -0.0109(4) 0.4623(4) 0.18301(9) 0.0167(6) Uani 1 1 d . . . . .
H20A H -0.1034 0.5232 0.1711 0.020 Uiso 1 1 calc R U . . .
H20B H 0.0350 0.3642 0.1739 0.020 Uiso 1 1 calc R U . . .
C21 C -0.0593(4) 0.4577(4) 0.22063(9) 0.0235(8) Uani 1 1 d . . . . .
H21A H 0.0306 0.3874 0.2321 0.028 Uiso 1 1 calc R U . . .
H21B H -0.1405 0.4255 0.2239 0.028 Uiso 1 1 calc R U . . .
C22 C -0.1206(4) 0.6048(5) 0.23648(10) 0.0259(8) Uani 1 1 d . . . . .
H22A H -0.2181 0.6723 0.2271 0.031 Uiso 1 1 calc R U . . .
H22B H -0.1433 0.5968 0.2611 0.031 Uiso 1 1 calc R U . . .
C23 C -0.0033(4) 0.6634(4) 0.22972(9) 0.0222(7) Uani 1 1 d . . . . .
H23A H 0.0905 0.6010 0.2410 0.027 Uiso 1 1 calc R U . . .
H23B H -0.0478 0.7607 0.2392 0.027 Uiso 1 1 calc R U . . .
C24 C 0.0405(4) 0.6701(4) 0.19181(8) 0.0161(6) Uani 1 1 d . . . . .
H24A H 0.1182 0.7066 0.1880 0.019 Uiso 1 1 calc R U . . .
H24B H -0.0521 0.7376 0.1807 0.019 Uiso 1 1 calc R U . . .
C25 C 0.5308(4) 0.5137(4) 0.17459(9) 0.0164(6) Uani 1 1 d . . . . .
H25 H 0.6409 0.4880 0.1773 0.020 Uiso 1 1 calc R U . . .
C26 C 0.4640(5) 0.6565(4) 0.15538(10) 0.0253(8) Uani 1 1 d . . . . .
H26A H 0.3563 0.6831 0.1512 0.030 Uiso 1 1 calc R U . . .
H26B H 0.5249 0.6461 0.1332 0.030 Uiso 1 1 calc R U . . .
C27 C 0.4660(6) 0.7763(4) 0.17501(12) 0.0361(10) Uani 1 1 d . . . . .
H27A H 0.5745 0.7552 0.1769 0.043 Uiso 1 1 calc R U . . .
H27B H 0.4159 0.8683 0.1625 0.043 Uiso 1 1 calc R U . . .
C28 C 0.3820(5) 0.7906(5) 0.21026(12) 0.0378(11) Uani 1 1 d . . . . .
H28A H 0.3914 0.8641 0.2228 0.045 Uiso 1 1 calc R U . . .
H28B H 0.2709 0.8227 0.2084 0.045 Uiso 1 1 calc R U . . .
C29 C 0.4487(5) 0.6486(5) 0.22964(11) 0.0304(9) Uani 1 1 d . . . . .
H29A H 0.3874 0.6594 0.2518 0.037 Uiso 1 1 calc R U . . .
H29B H 0.5563 0.6224 0.2339 0.037 Uiso 1 1 calc R U . . .
C30 C 0.4470(4) 0.5288(4) 0.21005(9) 0.0222(7) Uani 1 1 d . . . . .
H30A H 0.3386 0.5496 0.2083 0.027 Uiso 1 1 calc R U . . .
H30B H 0.4973 0.4369 0.2226 0.027 Uiso 1 1 calc R U . . .
C31 C 0.6825(4) 0.2664(4) 0.15266(8) 0.0150(6) Uani 1 1 d . . . . .
H31 H 0.6696 0.1985 0.1384 0.018 Uiso 1 1 calc R U . . .
C32 C 0.7260(4) 0.1900(4) 0.18669(9) 0.0197(7) Uani 1 1 d . . . . .
H32A H 0.7406 0.2531 0.2018 0.024 Uiso 1 1 calc R U . . .
H32B H 0.6406 0.1710 0.1974 0.024 Uiso 1 1 calc R U . . .
C33 C 0.8742(5) 0.0486(4) 0.18249(10) 0.0265(8) Uani 1 1 d . . . . .
H33A H 0.8997 0.0024 0.2049 0.032 Uiso 1 1 calc R U . . .
H33B H 0.8575 -0.0168 0.1685 0.032 Uiso 1 1 calc R U . . .
C34 C 1.0084(5) 0.0725(4) 0.16583(11) 0.0300(9) Uani 1 1 d . . . . .
H34A H 1.0318 0.1302 0.1808 0.036 Uiso 1 1 calc R U . . .
H34B H 1.1015 -0.0210 0.1623 0.036 Uiso 1 1 calc R U . . .
C35 C 0.9684(4) 0.1500(4) 0.13213(10) 0.0263(8) Uani 1 1 d . . . . .
H35A H 0.9604 0.0856 0.1163 0.032 Uiso 1 1 calc R U . . .
H35B H 1.0531 0.1724 0.1226 0.032 Uiso 1 1 calc R U . . .
C36 C 0.8169(4) 0.2889(4) 0.13498(9) 0.0193(7) Uani 1 1 d . . . . .
H36A H 0.7915 0.3292 0.1121 0.023 Uiso 1 1 calc R U . . .
H36B H 0.8306 0.3595 0.1477 0.023 Uiso 1 1 calc R U . . .
Hf2 Hf 0.25766(2) 0.84536(2) 0.36722(2) 0.01590(4) Uani 1 1 d . . . . .
Cl2 Cl 0.45638(11) 0.64403(10) 0.33625(3) 0.0304(2) Uani 1 1 d . . . . .
N4 N 0.3139(3) 1.0083(3) 0.35933(7) 0.0158(5) Uani 1 1 d . . . . .
N5 N 0.0585(3) 0.8896(3) 0.34749(7) 0.0173(6) Uani 1 1 d . . . . .
N6 N 0.2503(4) 0.7924(3) 0.41720(8) 0.0215(6) Uani 1 1 d . . . . .
C37 C 0.3365(4) 1.1086(4) 0.37952(9) 0.0178(7) Uani 1 1 d . . . . .
H37 H 0.3343 1.1886 0.3642 0.021 Uiso 0.5 1 calc R U P A 1
H37A H 0.3920 1.1539 0.3646 0.021 Uiso 0.5 1 calc R U P B 2
C43 C 0.3619(4) 1.0105(4) 0.32280(8) 0.0159(6) Uani 1 1 d . . . . .
H43 H 0.3300 0.9463 0.3120 0.019 Uiso 1 1 calc R U . . .
C44 C 0.5375(4) 0.9479(4) 0.31431(9) 0.0218(7) Uani 1 1 d . . . . .
H44A H 0.5746 1.0110 0.3233 0.026 Uiso 1 1 calc R U . . .
H44B H 0.5892 0.8523 0.3253 0.026 Uiso 1 1 calc R U . . .
C45 C 0.5799(5) 0.9339(5) 0.27628(10) 0.0356(10) Uani 1 1 d . . . . .
H45A H 0.6930 0.8973 0.2714 0.043 Uiso 1 1 calc R U . . .
H45B H 0.5517 0.8635 0.2677 0.043 Uiso 1 1 calc R U . . .
C46 C 0.4977(5) 1.0767(6) 0.25805(11) 0.0407(12) Uani 1 1 d . . . . .
H46A H 0.5205 1.0618 0.2334 0.049 Uiso 1 1 calc R U . . .
H46B H 0.5372 1.1427 0.2642 0.049 Uiso 1 1 calc R U . . .
C47 C 0.3226(5) 1.1450(5) 0.26708(10) 0.0303(9) Uani 1 1 d . . . . .
H47A H 0.2739 1.2416 0.2565 0.036 Uiso 1 1 calc R U . . .
H47B H 0.2806 1.0859 0.2581 0.036 Uiso 1 1 calc R U . . .
C48 C 0.2824(4) 1.1577(4) 0.30520(9) 0.0207(7) Uani 1 1 d . . . . .
H48A H 0.1690 1.1981 0.3104 0.025 Uiso 1 1 calc R U . . .
H48B H 0.3156 1.2241 0.3139 0.025 Uiso 1 1 calc R U . . .
C49 C -0.0599(4) 1.0059(4) 0.32895(9) 0.0207(7) Uani 1 1 d . . . . .
H49 H -0.1439 0.9784 0.3270 0.025 Uiso 1 1 calc R U . . .
C50 C -0.1323(5) 1.1463(5) 0.34805(11) 0.0317(9) Uani 1 1 d . . . . .
H50A H -0.1775 1.1318 0.3706 0.038 Uiso 1 1 calc R U . . .
H50B H -0.0506 1.1737 0.3514 0.038 Uiso 1 1 calc R U . . .
C51 C -0.2570(5) 1.2673(5) 0.32970(13) 0.0419(11) Uani 1 1 d . . . . .
H51A H -0.2947 1.3572 0.3423 0.050 Uiso 1 1 calc R U . . .
H51B H -0.3451 1.2458 0.3290 0.050 Uiso 1 1 calc R U . . .
C52 C -0.1986(5) 1.2888(5) 0.29389(11) 0.0344(10) Uani 1 1 d . . . . .
H52A H -0.1209 1.3241 0.2946 0.041 Uiso 1 1 calc R U . . .
H52B H -0.2857 1.3625 0.2822 0.041 Uiso 1 1 calc R U . . .
C53 C -0.1264(5) 1.1500(5) 0.27435(11) 0.0307(9) Uani 1 1 d . . . . .
H53A H -0.0812 1.1653 0.2519 0.037 Uiso 1 1 calc R U . . .
H53B H -0.2076 1.1221 0.2709 0.037 Uiso 1 1 calc R U . . .
C54 C 0.0000(4) 1.0284(4) 0.29310(9) 0.0228(7) Uani 1 1 d . . . . .
H54A H 0.0396 0.9383 0.2804 0.027 Uiso 1 1 calc R U . . .
H54B H 0.0870 1.0513 0.2941 0.027 Uiso 1 1 calc R U . . .
C55 C 0.0456(4) 0.7539(4) 0.34985(8) 0.0197(7) Uani 1 1 d . . . . .
H55 H 0.1278 0.6866 0.3641 0.024 Uiso 1 1 calc R U . . .
C56 C 0.0764(5) 0.6793(4) 0.31600(9) 0.0227(8) Uani 1 1 d . . . . .
H56A H -0.0046 0.7404 0.3012 0.027 Uiso 1 1 calc R U . . .
H56B H 0.1774 0.6662 0.3047 0.027 Uiso 1 1 calc R U . . .
C57 C 0.0774(6) 0.5336(5) 0.32120(10) 0.0339(10) Uani 1 1 d . . . . .
H57A H 0.1623 0.4706 0.3349 0.041 Uiso 1 1 calc R U . . .
H57B H 0.0966 0.4879 0.2990 0.041 Uiso 1 1 calc R U . . .
C58 C -0.0766(7) 0.5490(6) 0.33892(12) 0.0493(14) Uani 1 1 d . . . . .
H58A H -0.0712 0.4528 0.3431 0.059 Uiso 1 1 calc R U . . .
H58B H -0.1603 0.6040 0.3242 0.059 Uiso 1 1 calc R U . . .
C59 C -0.1136(7) 0.6264(6) 0.37257(12) 0.0475(14) Uani 1 1 d . . . . .
H59A H -0.2176 0.6427 0.3827 0.057 Uiso 1 1 calc R U . . .
H59B H -0.0376 0.5649 0.3884 0.057 Uiso 1 1 calc R U . . .
C60 C -0.1093(5) 0.7694(5) 0.36783(9) 0.0278(9) Uani 1 1 d . . . . .
H60A H -0.1264 0.8129 0.3902 0.033 Uiso 1 1 calc R U . . .
H60B H -0.1944 0.8350 0.3544 0.033 Uiso 1 1 calc R U . . .
C61 C 0.1292(5) 0.8182(5) 0.44494(10) 0.0277(8) Uani 1 1 d . . . . .
H61 H 0.1706 0.8263 0.4661 0.033 Uiso 1 1 calc R U . . .
C62 C -0.0119(5) 0.9612(5) 0.43938(12) 0.0364(10) Uani 1 1 d . . . . .
H62A H 0.0197 1.0387 0.4377 0.044 Uiso 1 1 calc R U . . .
H62B H -0.0506 0.9585 0.4177 0.044 Uiso 1 1 calc R U . . .
C63 C -0.1422(6) 0.9962(7) 0.46746(13) 0.0550(16) Uani 1 1 d . . . . .
H63A H -0.1082 1.0102 0.4887 0.066 Uiso 1 1 calc R U . . .
H63B H -0.2324 1.0868 0.4618 0.066 Uiso 1 1 calc R U . . .
C64 C -0.1889(6) 0.8771(7) 0.47232(13) 0.0562(16) Uani 1 1 d . . . . .
H64A H -0.2325 0.8692 0.4518 0.067 Uiso 1 1 calc R U . . .
H64B H -0.2697 0.8996 0.4915 0.067 Uiso 1 1 calc R U . . .
C65 C -0.0492(6) 0.7347(8) 0.47923(15) 0.070(2) Uani 1 1 d . . . . .
H65A H -0.0806 0.6571 0.4815 0.084 Uiso 1 1 calc R U . . .
H65B H -0.0112 0.7403 0.5008 0.084 Uiso 1 1 calc R U . . .
C66 C 0.0810(5) 0.6992(5) 0.45076(12) 0.0383(11) Uani 1 1 d . . . . .
H66A H 0.1714 0.6089 0.4564 0.046 Uiso 1 1 calc R U . . .
H66B H 0.0461 0.6841 0.4297 0.046 Uiso 1 1 calc R U . . .
C67 C 0.4127(5) 0.6984(4) 0.42512(10) 0.0265(8) Uani 1 1 d . . . . .
H67 H 0.4794 0.7174 0.4066 0.032 Uiso 1 1 calc R U . . .
C68 C 0.4547(6) 0.7337(7) 0.45770(11) 0.0499(15) Uani 1 1 d . . . . .
H68A H 0.3969 0.7113 0.4773 0.060 Uiso 1 1 calc R U . . .
H68B H 0.4252 0.8374 0.4580 0.060 Uiso 1 1 calc R U . . .
C69 C 0.6292(7) 0.6460(10) 0.46045(13) 0.074(2) Uani 1 1 d . . . . .
H69A H 0.6855 0.6773 0.4423 0.088 Uiso 1 1 calc R U . . .
H69B H 0.6534 0.6659 0.4823 0.088 Uiso 1 1 calc R U . . .
C70 C 0.6855(7) 0.4857(10) 0.45778(18) 0.094(3) Uani 1 1 d . . . . .
H70A H 0.7996 0.4356 0.4573 0.113 Uiso 1 1 calc R U . . .
H70B H 0.6426 0.4510 0.4779 0.113 Uiso 1 1 calc R U . . .
C71 C 0.6376(6) 0.4500(6) 0.42646(17) 0.0633(19) Uani 1 1 d . . . . .
H71A H 0.6663 0.3463 0.4268 0.076 Uiso 1 1 calc R U . . .
H71B H 0.6938 0.4703 0.4063 0.076 Uiso 1 1 calc R U . . .
C72 C 0.4637(6) 0.5367(5) 0.42408(16) 0.0502(14) Uani 1 1 d . . . . .
H72A H 0.4074 0.5094 0.4431 0.060 Uiso 1 1 calc R U . . .
H72B H 0.4372 0.5140 0.4028 0.060 Uiso 1 1 calc R U . . .
C38A C 0.2122(11) 1.1739(11) 0.4080(2) 0.0278(18) Uani 0.5 1 d . . P C 1
H38A H 0.2116 1.0966 0.4236 0.033 Uiso 0.5 1 calc R U P C 1
H38B H 0.1104 1.2231 0.3988 0.033 Uiso 0.5 1 calc R U P C 1
C39A C 0.2361(14) 1.2815(12) 0.4277(3) 0.031(2) Uani 0.5 1 d . . P C 1
H39A H 0.2280 1.3632 0.4127 0.037 Uiso 0.5 1 calc R U P C 1
H39B H 0.1541 1.3194 0.4467 0.037 Uiso 0.5 1 calc R U P C 1
C40A C 0.3943(17) 1.2109(14) 0.4415(2) 0.032(2) Uani 0.5 1 d . . P C 1
H40A H 0.4098 1.2837 0.4529 0.039 Uiso 0.5 1 calc R U P C 1
H40B H 0.3986 1.1360 0.4584 0.039 Uiso 0.5 1 calc R U P C 1
C41A C 0.5213(10) 1.1443(10) 0.4134(2) 0.0255(17) Uani 0.5 1 d . . P C 1
H41A H 0.6225 1.0965 0.4229 0.031 Uiso 0.5 1 calc R U P C 1
H41B H 0.5221 1.2205 0.3975 0.031 Uiso 0.5 1 calc R U P C 1
C42A C 0.4987(11) 1.0348(9) 0.3943(2) 0.0254(17) Uani 0.5 1 d . . P C 1
H42A H 0.5046 0.9552 0.4098 0.031 Uiso 0.5 1 calc R U P C 1
H42B H 0.5821 0.9944 0.3757 0.031 Uiso 0.5 1 calc R U P C 1
C38B C 0.1777(9) 1.2289(9) 0.3939(2) 0.0220(15) Uani 0.5 1 d . . P C 2
H38C H 0.1160 1.2814 0.3750 0.026 Uiso 0.5 1 calc R U P C 2
H38D H 0.1203 1.1849 0.4081 0.026 Uiso 0.5 1 calc R U P C 2
C39B C 0.1982(12) 1.3350(10) 0.4151(3) 0.029(2) Uani 0.5 1 d . . P C 2
H39C H 0.2454 1.3869 0.4005 0.035 Uiso 0.5 1 calc R U P C 2
H39D H 0.0958 1.4064 0.4251 0.035 Uiso 0.5 1 calc R U P C 2
C40B C 0.2995(19) 1.2567(12) 0.4428(3) 0.036(2) Uani 0.5 1 d . . P C 2
H40C H 0.3173 1.3258 0.4551 0.043 Uiso 0.5 1 calc R U P C 2
H40D H 0.2453 1.2155 0.4590 0.043 Uiso 0.5 1 calc R U P C 2
C41B C 0.4523(14) 1.1387(12) 0.4297(3) 0.042(3) Uani 0.5 1 d . . P C 2
H41C H 0.5115 1.0866 0.4490 0.051 Uiso 0.5 1 calc R U P C 2
H41D H 0.5124 1.1807 0.4158 0.051 Uiso 0.5 1 calc R U P C 2
C42B C 0.4316(12) 1.0322(9) 0.4083(3) 0.033(2) Uani 0.5 1 d . . P C 2
H42C H 0.5343 0.9580 0.3993 0.039 Uiso 0.5 1 calc R U P C 2
H42D H 0.3799 0.9836 0.4228 0.039 Uiso 0.5 1 calc R U P C 2
 
loop_
 _atom_site_aniso_label
 _atom_site_aniso_U_11
 _atom_site_aniso_U_22
 _atom_site_aniso_U_33
 _atom_site_aniso_U_23
 _atom_site_aniso_U_13
 _atom_site_aniso_U_12
Hf1 0.01112(6) 0.01114(6) 0.01336(6) -0.00080(5) -0.00198(5) -0.00456(5)
Cl1 0.0238(4) 0.0147(4) 0.0240(4) 0.0026(3) -0.0043(3) -0.0103(3)
N1 0.0136(13) 0.0160(14) 0.0151(13) -0.0041(11) -0.0006(10) -0.0050(11)
N2 0.0132(13) 0.0119(13) 0.0138(13) 0.0006(10) -0.0029(10) -0.0037(11)
N3 0.0135(13) 0.0104(12) 0.0175(13) -0.0019(10) -0.0013(10) -0.0059(11)
C1 0.0187(17) 0.0202(17) 0.0142(15) 0.0016(13) -0.0015(13) -0.0081(14)
C2 0.0242(19) 0.0169(17) 0.029(2) 0.0041(15) -0.0052(15) -0.0071(15)
C3 0.045(3) 0.031(2) 0.028(2) 0.0108(17) -0.0131(18) -0.026(2)
C4 0.043(2) 0.042(2) 0.0222(19) -0.0086(17) 0.0077(17) -0.033(2)
C5 0.041(2) 0.041(2) 0.032(2) -0.0157(19) 0.0184(19) -0.031(2)
C6 0.0226(18) 0.0215(18) 0.0270(19) -0.0081(15) 0.0094(15) -0.0099(15)
C7 0.0150(16) 0.0245(18) 0.0176(16) -0.0088(14) 0.0022(13) -0.0090(14)
C8 0.0230(19) 0.0228(19) 0.035(2) -0.0122(16) 0.0079(16) -0.0121(16)
C9 0.035(2) 0.034(2) 0.042(2) -0.0169(19) 0.0147(19) -0.023(2)
C10 0.062(3) 0.059(3) 0.038(3) -0.028(2) 0.016(2) -0.048(3)
C11 0.038(3) 0.080(4) 0.022(2) -0.012(2) -0.0009(18) -0.040(3)
C12 0.026(2) 0.049(3) 0.0148(17) -0.0124(17) 0.0019(14) -0.0198(19)
C13 0.0122(15) 0.0151(15) 0.0148(15) -0.0004(12) -0.0036(12) -0.0033(12)
C14 0.039(2) 0.0204(19) 0.031(2) 0.0011(16) -0.0202(18) -0.0117(17)
C15 0.042(3) 0.029(2) 0.034(2) 0.0007(18) -0.024(2) -0.014(2)
C16 0.036(2) 0.023(2) 0.0179(18) 0.0015(15) -0.0087(16) 0.0006(17)
C17 0.029(2) 0.0173(17) 0.0265(19) 0.0074(15) -0.0090(16) -0.0083(16)
C18 0.0236(18) 0.0196(18) 0.0290(19) 0.0031(15) -0.0076(15) -0.0103(15)
C19 0.0110(14) 0.0144(15) 0.0145(14) -0.0008(12) -0.0014(11) -0.0058(12)
C20 0.0134(15) 0.0183(16) 0.0203(16) -0.0019(13) -0.0012(12) -0.0087(13)
C21 0.0218(18) 0.028(2) 0.0232(18) 0.0034(15) -0.0007(14) -0.0147(16)
C22 0.0211(18) 0.038(2) 0.0201(18) -0.0057(16) 0.0050(14) -0.0156(17)
C23 0.0213(18) 0.031(2) 0.0162(16) -0.0071(14) 0.0007(13) -0.0131(16)
C24 0.0141(15) 0.0146(15) 0.0191(16) -0.0026(12) -0.0025(12) -0.0056(13)
C25 0.0160(16) 0.0153(16) 0.0205(16) -0.0019(13) -0.0042(13) -0.0085(13)
C26 0.032(2) 0.0176(18) 0.029(2) 0.0009(15) -0.0106(16) -0.0121(16)
C27 0.044(3) 0.0175(19) 0.052(3) -0.0011(18) -0.020(2) -0.0148(19)
C28 0.032(2) 0.031(2) 0.049(3) -0.021(2) -0.013(2) -0.0085(19)
C29 0.0217(19) 0.038(2) 0.030(2) -0.0185(18) -0.0013(16) -0.0107(18)
C30 0.0181(17) 0.0258(19) 0.0234(18) -0.0074(15) -0.0038(14) -0.0092(15)
C31 0.0140(15) 0.0134(15) 0.0170(15) -0.0011(12) -0.0041(12) -0.0052(12)
C32 0.0226(18) 0.0161(16) 0.0210(17) 0.0030(13) -0.0075(14) -0.0085(14)
C33 0.030(2) 0.0149(17) 0.032(2) 0.0034(15) -0.0146(17) -0.0059(15)
C34 0.0215(19) 0.025(2) 0.035(2) -0.0057(17) -0.0095(16) -0.0019(16)
C35 0.0158(17) 0.028(2) 0.031(2) -0.0097(16) -0.0032(15) -0.0055(15)
C36 0.0175(16) 0.0245(18) 0.0168(16) -0.0013(13) -0.0037(13) -0.0098(14)
Hf2 0.01795(7) 0.01534(7) 0.01681(7) -0.00238(5) -0.00047(5) -0.00962(6)
Cl2 0.0272(5) 0.0200(4) 0.0369(5) -0.0111(4) -0.0021(4) -0.0036(4)
N4 0.0171(14) 0.0175(14) 0.0155(13) -0.0036(11) 0.0013(11) -0.0103(12)
N5 0.0211(15) 0.0176(14) 0.0171(14) -0.0016(11) -0.0017(11) -0.0121(12)
N6 0.0274(16) 0.0240(16) 0.0195(15) 0.0028(12) -0.0044(12) -0.0170(14)
C37 0.0235(17) 0.0189(17) 0.0169(16) -0.0047(13) -0.0002(13) -0.0145(15)
C43 0.0134(15) 0.0214(17) 0.0154(15) -0.0033(13) 0.0001(12) -0.0099(13)
C44 0.0157(16) 0.029(2) 0.0205(17) -0.0010(15) -0.0025(13) -0.0103(15)
C45 0.0154(18) 0.062(3) 0.024(2) -0.008(2) 0.0042(15) -0.0129(19)
C46 0.029(2) 0.074(4) 0.023(2) 0.012(2) -0.0034(17) -0.029(2)
C47 0.027(2) 0.051(3) 0.0199(18) 0.0092(18) -0.0077(15) -0.023(2)
C48 0.0219(18) 0.0239(18) 0.0194(17) 0.0037(14) -0.0063(14) -0.0126(15)
C49 0.0163(16) 0.0242(18) 0.0232(18) -0.0001(14) -0.0036(14) -0.0101(15)
C50 0.030(2) 0.030(2) 0.026(2) -0.0018(17) 0.0056(17) -0.0077(18)
C51 0.032(2) 0.034(3) 0.045(3) 0.001(2) 0.002(2) -0.004(2)
C52 0.030(2) 0.026(2) 0.039(2) 0.0072(18) -0.0101(19) -0.0061(18)
C53 0.030(2) 0.036(2) 0.030(2) 0.0063(18) -0.0122(17) -0.0177(19)
C54 0.0244(19) 0.0250(19) 0.0224(18) -0.0013(15) -0.0072(14) -0.0130(16)
C55 0.0302(19) 0.0221(18) 0.0138(15) -0.0032(13) -0.0002(13) -0.0180(16)
C56 0.032(2) 0.0246(19) 0.0161(16) -0.0080(14) 0.0018(14) -0.0169(17)
C57 0.063(3) 0.029(2) 0.0220(19) -0.0063(16) 0.0014(19) -0.032(2)
C58 0.085(4) 0.057(3) 0.038(3) -0.021(2) 0.017(3) -0.062(3)
C59 0.084(4) 0.058(3) 0.032(2) -0.016(2) 0.018(2) -0.063(3)
C60 0.042(2) 0.039(2) 0.0166(17) -0.0073(16) 0.0056(16) -0.032(2)
C61 0.030(2) 0.034(2) 0.0202(18) -0.0058(16) -0.0010(15) -0.0143(18)
C62 0.035(2) 0.028(2) 0.048(3) -0.014(2) 0.001(2) -0.0154(19)
C63 0.038(3) 0.071(4) 0.039(3) -0.031(3) 0.000(2) -0.007(3)
C64 0.035(3) 0.080(4) 0.032(3) 0.017(3) 0.010(2) -0.012(3)
C65 0.031(3) 0.102(5) 0.051(3) 0.045(3) 0.004(2) -0.016(3)
C66 0.028(2) 0.038(2) 0.044(3) 0.021(2) 0.0016(19) -0.014(2)
C67 0.031(2) 0.033(2) 0.0225(18) 0.0104(16) -0.0062(15) -0.0211(18)
C68 0.039(3) 0.103(5) 0.018(2) 0.008(2) -0.0045(18) -0.042(3)
C69 0.043(3) 0.162(8) 0.021(2) 0.000(3) -0.005(2) -0.051(4)
C70 0.039(3) 0.156(8) 0.065(4) 0.071(5) -0.012(3) -0.033(4)
C71 0.032(3) 0.051(3) 0.097(5) 0.048(3) -0.008(3) -0.017(2)
C72 0.035(3) 0.036(3) 0.082(4) 0.027(3) -0.007(3) -0.021(2)
C38A 0.036(5) 0.036(5) 0.016(4) -0.005(4) 0.003(4) -0.022(4)
C39A 0.045(7) 0.031(6) 0.021(5) -0.012(4) 0.007(5) -0.021(5)
C40A 0.063(7) 0.034(6) 0.017(4) -0.002(4) 0.000(6) -0.037(6)
C41A 0.029(4) 0.037(5) 0.019(4) -0.002(3) -0.004(3) -0.022(4)
C42A 0.032(5) 0.030(4) 0.020(4) -0.003(3) -0.003(3) -0.019(4)
C38B 0.026(4) 0.018(4) 0.022(4) -0.008(3) -0.005(3) -0.009(3)
C39B 0.039(5) 0.020(5) 0.029(5) -0.007(4) -0.013(4) -0.011(4)
C40B 0.067(8) 0.024(5) 0.021(5) -0.001(4) -0.008(6) -0.024(6)
C41B 0.042(6) 0.035(6) 0.052(7) -0.011(5) -0.023(5) -0.014(5)
C42B 0.037(5) 0.022(4) 0.038(5) -0.003(4) -0.023(4) -0.009(4)
 
_geom_special_details
;
 All esds (except the esd in the dihedral angle between two l.s. planes)
 are estimated using the full covariance matrix.  The cell esds are taken
 into account individually in the estimation of esds in distances, angles
 and torsion angles; correlations between esds in cell parameters are only
 used when they are defined by crystal symmetry.  An approximate (isotropic)
 treatment of cell esds is used for estimating esds involving l.s. planes.
;
 
loop_
 _geom_bond_atom_site_label_1
 _geom_bond_atom_site_label_2
 _geom_bond_distance
 _geom_bond_site_symmetry_2
 _geom_bond_publ_flag
Hf1 N2 2.022(3) . ?
Hf1 N3 2.023(3) . ?
Hf1 N1 2.042(3) . ?
Hf1 Cl1 2.4016(8) . ?
N1 C1 1.473(4) . ?
N1 C7 1.496(4) . ?
N2 C13 1.477(4) . ?
N2 C19 1.488(4) . ?
N3 C25 1.476(4) . ?
N3 C31 1.484(4) . ?
C1 C6 1.523(5) . ?
C1 C2 1.533(5) . ?
C1 H1 1.0000 . ?
C2 C3 1.534(6) . ?
C2 H2A 0.9900 . ?
C2 H2B 0.9900 . ?
C3 C4 1.529(6) . ?
C3 H3A 0.9900 . ?
C3 H3B 0.9900 . ?
C4 C5 1.526(5) . ?
C4 H4A 0.9900 . ?
C4 H4B 0.9900 . ?
C5 C6 1.529(5) . ?
C5 H5A 0.9900 . ?
C5 H5B 0.9900 . ?
C6 H6A 0.9900 . ?
C6 H6B 0.9900 . ?
C7 C12 1.537(5) . ?
C7 C8 1.543(5) . ?
C7 H7 1.0000 . ?
C8 C9 1.541(5) . ?
C8 H8A 0.9900 . ?
C8 H8B 0.9900 . ?
C9 C10 1.511(7) . ?
C9 H9A 0.9900 . ?
C9 H9B 0.9900 . ?
C10 C11 1.527(8) . ?
C10 H10A 0.9900 . ?
C10 H10B 0.9900 . ?
C11 C12 1.542(6) . ?
C11 H11A 0.9900 . ?
C11 H11B 0.9900 . ?
C12 H12A 0.9900 . ?
C12 H12B 0.9900 . ?
C13 C18 1.518(5) . ?
C13 C14 1.527(5) . ?
C13 H13 1.0000 . ?
C14 C15 1.535(5) . ?
C14 H14A 0.9900 . ?
C14 H14B 0.9900 . ?
C15 C16 1.499(6) . ?
C15 H15A 0.9900 . ?
C15 H15B 0.9900 . ?
C16 C17 1.516(5) . ?
C16 H16A 0.9900 . ?
C16 H16B 0.9900 . ?
C17 C18 1.538(5) . ?
C17 H17A 0.9900 . ?
C17 H17B 0.9900 . ?
C18 H18A 0.9900 . ?
C18 H18B 0.9900 . ?
C19 C24 1.532(4) . ?
C19 C20 1.534(4) . ?
C19 H19 1.0000 . ?
C20 C21 1.526(5) . ?
C20 H20A 0.9900 . ?
C20 H20B 0.9900 . ?
C21 C22 1.528(5) . ?
C21 H21A 0.9900 . ?
C21 H21B 0.9900 . ?
C22 C23 1.524(5) . ?
C22 H22A 0.9900 . ?
C22 H22B 0.9900 . ?
C23 C24 1.530(5) . ?
C23 H23A 0.9900 . ?
C23 H23B 0.9900 . ?
C24 H24A 0.9900 . ?
C24 H24B 0.9900 . ?
C25 C26 1.525(5) . ?
C25 C30 1.531(5) . ?
C25 H25 1.0000 . ?
C26 C27 1.532(5) . ?
C26 H26A 0.9900 . ?
C26 H26B 0.9900 . ?
C27 C28 1.525(7) . ?
C27 H27A 0.9900 . ?
C27 H27B 0.9900 . ?
C28 C29 1.521(7) . ?
C28 H28A 0.9900 . ?
C28 H28B 0.9900 . ?
C29 C30 1.531(5) . ?
C29 H29A 0.9900 . ?
C29 H29B 0.9900 . ?
C30 H30A 0.9900 . ?
C30 H30B 0.9900 . ?
C31 C36 1.528(5) . ?
C31 C32 1.531(5) . ?
C31 H31 1.0000 . ?
C32 C33 1.527(5) . ?
C32 H32A 0.9900 . ?
C32 H32B 0.9900 . ?
C33 C34 1.520(6) . ?
C33 H33A 0.9900 . ?
C33 H33B 0.9900 . ?
C34 C35 1.519(6) . ?
C34 H34A 0.9900 . ?
C34 H34B 0.9900 . ?
C35 C36 1.527(5) . ?
C35 H35A 0.9900 . ?
C35 H35B 0.9900 . ?
C36 H36A 0.9900 . ?
C36 H36B 0.9900 . ?
Hf2 N4 2.020(3) . ?
Hf2 N5 2.026(3) . ?
Hf2 N6 2.037(3) . ?
Hf2 Cl2 2.4056(9) . ?
N4 C37 1.474(4) . ?
N4 C43 1.481(4) . ?
N5 C49 1.469(5) . ?
N5 C55 1.482(4) . ?
N6 C61 1.465(5) . ?
N6 C67 1.493(5) . ?
C37 C38A 1.503(9) . ?
C37 C42B 1.506(9) . ?
C37 C38B 1.558(9) . ?
C37 C42A 1.579(9) . ?
C37 H37 1.0000 . ?
C37 H37A 1.0000 . ?
C43 C44 1.535(5) . ?
C43 C48 1.537(5) . ?
C43 H43 1.0000 . ?
C44 C45 1.524(5) . ?
C44 H44A 0.9900 . ?
C44 H44B 0.9900 . ?
C45 C46 1.519(7) . ?
C45 H45A 0.9900 . ?
C45 H45B 0.9900 . ?
C46 C47 1.530(6) . ?
C46 H46A 0.9900 . ?
C46 H46B 0.9900 . ?
C47 C48 1.525(5) . ?
C47 H47A 0.9900 . ?
C47 H47B 0.9900 . ?
C48 H48A 0.9900 . ?
C48 H48B 0.9900 . ?
C49 C50 1.522(5) . ?
C49 C54 1.528(5) . ?
C49 H49 1.0000 . ?
C50 C51 1.516(6) . ?
C50 H50A 0.9900 . ?
C50 H50B 0.9900 . ?
C51 C52 1.519(6) . ?
C51 H51A 0.9900 . ?
C51 H51B 0.9900 . ?
C52 C53 1.519(6) . ?
C52 H52A 0.9900 . ?
C52 H52B 0.9900 . ?
C53 C54 1.535(5) . ?
C53 H53A 0.9900 . ?
C53 H53B 0.9900 . ?
C54 H54A 0.9900 . ?
C54 H54B 0.9900 . ?
C55 C56 1.535(5) . ?
C55 C60 1.542(5) . ?
C55 H55 1.0000 . ?
C56 C57 1.525(5) . ?
C56 H56A 0.9900 . ?
C56 H56B 0.9900 . ?
C57 C58 1.531(7) . ?
C57 H57A 0.9900 . ?
C57 H57B 0.9900 . ?
C58 C59 1.534(6) . ?
C58 H58A 0.9900 . ?
C58 H58B 0.9900 . ?
C59 C60 1.520(6) . ?
C59 H59A 0.9900 . ?
C59 H59B 0.9900 . ?
C60 H60A 0.9900 . ?
C60 H60B 0.9900 . ?
C61 C66 1.521(6) . ?
C61 C62 1.526(6) . ?
C61 H61 1.0000 . ?
C62 C63 1.520(7) . ?
C62 H62A 0.9900 . ?
C62 H62B 0.9900 . ?
C63 C64 1.511(9) . ?
C63 H63A 0.9900 . ?
C63 H63B 0.9900 . ?
C64 C65 1.528(8) . ?
C64 H64A 0.9900 . ?
C64 H64B 0.9900 . ?
C65 C66 1.529(7) . ?
C65 H65A 0.9900 . ?
C65 H65B 0.9900 . ?
C66 H66A 0.9900 . ?
C66 H66B 0.9900 . ?
C67 C68 1.524(6) . ?
C67 C72 1.535(6) . ?
C67 H67 1.0000 . ?
C68 C69 1.536(8) . ?
C68 H68A 0.9900 . ?
C68 H68B 0.9900 . ?
C69 C70 1.518(11) . ?
C69 H69A 0.9900 . ?
C69 H69B 0.9900 . ?
C70 C71 1.510(11) . ?
C70 H70A 0.9900 . ?
C70 H70B 0.9900 . ?
C71 C72 1.528(7) . ?
C71 H71A 0.9900 . ?
C71 H71B 0.9900 . ?
C72 H72A 0.9900 . ?
C72 H72B 0.9900 . ?
C38A C39A 1.534(12) . ?
C38A H38A 0.9900 . ?
C38A H38B 0.9900 . ?
C39A C40A 1.529(16) . ?
C39A H39A 0.9900 . ?
C39A H39B 0.9900 . ?
C40A C41A 1.510(14) . ?
C40A H40A 0.9900 . ?
C40A H40B 0.9900 . ?
C41A C42A 1.527(11) . ?
C41A H41A 0.9900 . ?
C41A H41B 0.9900 . ?
C42A H42A 0.9900 . ?
C42A H42B 0.9900 . ?
C38B C39B 1.537(11) . ?
C38B H38C 0.9900 . ?
C38B H38D 0.9900 . ?
C39B C40B 1.503(14) . ?
C39B H39C 0.9900 . ?
C39B H39D 0.9900 . ?
C40B C41B 1.498(16) . ?
C40B H40C 0.9900 . ?
C40B H40D 0.9900 . ?
C41B C42B 1.547(13) . ?
C41B H41C 0.9900 . ?
C41B H41D 0.9900 . ?
C42B H42C 0.9900 . ?
C42B H42D 0.9900 . ?
 
loop_
 _geom_angle_atom_site_label_1
 _geom_angle_atom_site_label_2
 _geom_angle_atom_site_label_3
 _geom_angle
 _geom_angle_site_symmetry_1
 _geom_angle_site_symmetry_3
 _geom_angle_publ_flag
N2 Hf1 N3 111.42(11) . . ?
N2 Hf1 N1 110.32(11) . . ?
N3 Hf1 N1 113.08(11) . . ?
N2 Hf1 Cl1 106.74(8) . . ?
N3 Hf1 Cl1 105.63(8) . . ?
N1 Hf1 Cl1 109.34(8) . . ?
C1 N1 C7 116.8(3) . . ?
C1 N1 Hf1 135.1(2) . . ?
C7 N1 Hf1 108.0(2) . . ?
C13 N2 C19 114.0(3) . . ?
C13 N2 Hf1 138.4(2) . . ?
C19 N2 Hf1 107.25(19) . . ?
C25 N3 C31 114.0(3) . . ?
C25 N3 Hf1 138.7(2) . . ?
C31 N3 Hf1 106.72(19) . . ?
N1 C1 C6 113.9(3) . . ?
N1 C1 C2 109.0(3) . . ?
C6 C1 C2 110.6(3) . . ?
N1 C1 Hf1 26.28(14) . . ?
C6 C1 Hf1 114.5(2) . . ?
C2 C1 Hf1 85.4(2) . . ?
N1 C1 H1 107.7 . . ?
C6 C1 H1 107.7 . . ?
C2 C1 H1 107.7 . . ?
Hf1 C1 H1 127.7 . . ?
C1 C2 C3 112.4(3) . . ?
C1 C2 H2A 109.1 . . ?
C3 C2 H2A 109.1 . . ?
C1 C2 H2B 109.1 . . ?
C3 C2 H2B 109.1 . . ?
H2A C2 H2B 107.9 . . ?
C4 C3 C2 111.5(3) . . ?
C4 C3 H3A 109.3 . . ?
C2 C3 H3A 109.3 . . ?
C4 C3 H3B 109.3 . . ?
C2 C3 H3B 109.3 . . ?
H3A C3 H3B 108.0 . . ?
C5 C4 C3 110.2(3) . . ?
C5 C4 H4A 109.6 . . ?
C3 C4 H4A 109.6 . . ?
C5 C4 H4B 109.6 . . ?
C3 C4 H4B 109.6 . . ?
H4A C4 H4B 108.1 . . ?
C4 C5 C6 111.2(3) . . ?
C4 C5 H5A 109.4 . . ?
C6 C5 H5A 109.4 . . ?
C4 C5 H5B 109.4 . . ?
C6 C5 H5B 109.4 . . ?
H5A C5 H5B 108.0 . . ?
C1 C6 C5 111.7(3) . . ?
C1 C6 H6A 109.3 . . ?
C5 C6 H6A 109.3 . . ?
C1 C6 H6B 109.3 . . ?
C5 C6 H6B 109.3 . . ?
H6A C6 H6B 107.9 . . ?
N1 C7 C12 115.0(3) . . ?
N1 C7 C8 115.3(3) . . ?
C12 C7 C8 108.8(3) . . ?
N1 C7 Hf1 42.38(14) . . ?
C12 C7 Hf1 141.0(3) . . ?
C8 C7 Hf1 110.1(2) . . ?
N1 C7 H7 105.6 . . ?
C12 C7 H7 105.6 . . ?
C8 C7 H7 105.6 . . ?
Hf1 C7 H7 66.7 . . ?
C9 C8 C7 110.9(3) . . ?
C9 C8 H8A 109.5 . . ?
C7 C8 H8A 109.5 . . ?
C9 C8 H8B 109.5 . . ?
C7 C8 H8B 109.5 . . ?
H8A C8 H8B 108.0 . . ?
C10 C9 C8 110.6(4) . . ?
C10 C9 H9A 109.5 . . ?
C8 C9 H9A 109.5 . . ?
C10 C9 H9B 109.5 . . ?
C8 C9 H9B 109.5 . . ?
H9A C9 H9B 108.1 . . ?
C9 C10 C11 111.7(3) . . ?
C9 C10 H10A 109.3 . . ?
C11 C10 H10A 109.3 . . ?
C9 C10 H10B 109.3 . . ?
C11 C10 H10B 109.3 . . ?
H10A C10 H10B 107.9 . . ?
C10 C11 C12 111.6(4) . . ?
C10 C11 H11A 109.3 . . ?
C12 C11 H11A 109.3 . . ?
C10 C11 H11B 109.3 . . ?
C12 C11 H11B 109.3 . . ?
H11A C11 H11B 108.0 . . ?
C7 C12 C11 110.5(3) . . ?
C7 C12 H12A 109.6 . . ?
C11 C12 H12A 109.6 . . ?
C7 C12 H12B 109.6 . . ?
C11 C12 H12B 109.6 . . ?
H12A C12 H12B 108.1 . . ?
N2 C13 C18 111.7(3) . . ?
N2 C13 C14 111.4(3) . . ?
C18 C13 C14 110.2(3) . . ?
N2 C13 H13 107.8 . . ?
C18 C13 H13 107.8 . . ?
C14 C13 H13 107.8 . . ?
C13 C14 C15 110.8(3) . . ?
C13 C14 H14A 109.5 . . ?
C15 C14 H14A 109.5 . . ?
C13 C14 H14B 109.5 . . ?
C15 C14 H14B 109.5 . . ?
H14A C14 H14B 108.1 . . ?
C16 C15 C14 111.9(3) . . ?
C16 C15 H15A 109.2 . . ?
C14 C15 H15A 109.2 . . ?
C16 C15 H15B 109.2 . . ?
C14 C15 H15B 109.2 . . ?
H15A C15 H15B 107.9 . . ?
C15 C16 C17 111.7(3) . . ?
C15 C16 H16A 109.3 . . ?
C17 C16 H16A 109.3 . . ?
C15 C16 H16B 109.3 . . ?
C17 C16 H16B 109.3 . . ?
H16A C16 H16B 107.9 . . ?
C16 C17 C18 111.2(3) . . ?
C16 C17 H17A 109.4 . . ?
C18 C17 H17A 109.4 . . ?
C16 C17 H17B 109.4 . . ?
C18 C17 H17B 109.4 . . ?
H17A C17 H17B 108.0 . . ?
C13 C18 C17 111.5(3) . . ?
C13 C18 H18A 109.3 . . ?
C17 C18 H18A 109.3 . . ?
C13 C18 H18B 109.3 . . ?
C17 C18 H18B 109.3 . . ?
H18A C18 H18B 108.0 . . ?
N2 C19 C24 114.2(3) . . ?
N2 C19 C20 112.8(3) . . ?
C24 C19 C20 109.7(3) . . ?
N2 C19 Hf1 42.77(14) . . ?
C24 C19 Hf1 133.9(2) . . ?
C20 C19 Hf1 116.2(2) . . ?
N2 C19 H19 106.6 . . ?
C24 C19 H19 106.6 . . ?
C20 C19 H19 106.6 . . ?
Hf1 C19 H19 64.7 . . ?
C21 C20 C19 111.9(3) . . ?
C21 C20 H20A 109.2 . . ?
C19 C20 H20A 109.2 . . ?
C21 C20 H20B 109.2 . . ?
C19 C20 H20B 109.2 . . ?
H20A C20 H20B 107.9 . . ?
C20 C21 C22 111.3(3) . . ?
C20 C21 H21A 109.4 . . ?
C22 C21 H21A 109.4 . . ?
C20 C21 H21B 109.4 . . ?
C22 C21 H21B 109.4 . . ?
H21A C21 H21B 108.0 . . ?
C23 C22 C21 111.0(3) . . ?
C23 C22 H22A 109.4 . . ?
C21 C22 H22A 109.4 . . ?
C23 C22 H22B 109.4 . . ?
C21 C22 H22B 109.4 . . ?
H22A C22 H22B 108.0 . . ?
C22 C23 C24 110.8(3) . . ?
C22 C23 H23A 109.5 . . ?
C24 C23 H23A 109.5 . . ?
C22 C23 H23B 109.5 . . ?
C24 C23 H23B 109.5 . . ?
H23A C23 H23B 108.1 . . ?
C23 C24 C19 110.9(3) . . ?
C23 C24 H24A 109.4 . . ?
C19 C24 H24A 109.5 . . ?
C23 C24 H24B 109.5 . . ?
C19 C24 H24B 109.5 . . ?
H24A C24 H24B 108.0 . . ?
N3 C25 C26 111.0(3) . . ?
N3 C25 C30 113.5(3) . . ?
C26 C25 C30 110.7(3) . . ?
N3 C25 H25 107.1 . . ?
C26 C25 H25 107.1 . . ?
C30 C25 H25 107.1 . . ?
C25 C26 C27 111.6(3) . . ?
C25 C26 H26A 109.3 . . ?
C27 C26 H26A 109.3 . . ?
C25 C26 H26B 109.3 . . ?
C27 C26 H26B 109.3 . . ?
H26A C26 H26B 108.0 . . ?
C28 C27 C26 111.4(4) . . ?
C28 C27 H27A 109.3 . . ?
C26 C27 H27A 109.3 . . ?
C28 C27 H27B 109.3 . . ?
C26 C27 H27B 109.3 . . ?
H27A C27 H27B 108.0 . . ?
C29 C28 C27 111.2(4) . . ?
C29 C28 H28A 109.4 . . ?
C27 C28 H28A 109.4 . . ?
C29 C28 H28B 109.4 . . ?
C27 C28 H28B 109.4 . . ?
H28A C28 H28B 108.0 . . ?
C28 C29 C30 111.3(3) . . ?
C28 C29 H29A 109.4 . . ?
C30 C29 H29A 109.4 . . ?
C28 C29 H29B 109.4 . . ?
C30 C29 H29B 109.4 . . ?
H29A C29 H29B 108.0 . . ?
C29 C30 C25 111.9(3) . . ?
C29 C30 H30A 109.2 . . ?
C25 C30 H30A 109.2 . . ?
C29 C30 H30B 109.2 . . ?
C25 C30 H30B 109.2 . . ?
H30A C30 H30B 107.9 . . ?
N3 C31 C36 113.9(3) . . ?
N3 C31 C32 113.5(3) . . ?
C36 C31 C32 109.9(3) . . ?
N3 C31 Hf1 43.16(13) . . ?
C36 C31 Hf1 131.3(2) . . ?
C32 C31 Hf1 118.7(2) . . ?
N3 C31 H31 106.3 . . ?
C36 C31 H31 106.3 . . ?
C32 C31 H31 106.3 . . ?
Hf1 C31 H31 63.6 . . ?
C33 C32 C31 111.3(3) . . ?
C33 C32 H32A 109.4 . . ?
C31 C32 H32A 109.4 . . ?
C33 C32 H32B 109.4 . . ?
C31 C32 H32B 109.4 . . ?
H32A C32 H32B 108.0 . . ?
C34 C33 C32 111.2(3) . . ?
C34 C33 H33A 109.4 . . ?
C32 C33 H33A 109.4 . . ?
C34 C33 H33B 109.4 . . ?
C32 C33 H33B 109.4 . . ?
H33A C33 H33B 108.0 . . ?
C35 C34 C33 110.2(3) . . ?
C35 C34 H34A 109.6 . . ?
C33 C34 H34A 109.6 . . ?
C35 C34 H34B 109.6 . . ?
C33 C34 H34B 109.6 . . ?
H34A C34 H34B 108.1 . . ?
C34 C35 C36 112.8(3) . . ?
C34 C35 H35A 109.0 . . ?
C36 C35 H35A 109.0 . . ?
C34 C35 H35B 109.0 . . ?
C36 C35 H35B 109.0 . . ?
H35A C35 H35B 107.8 . . ?
C35 C36 C31 112.5(3) . . ?
C35 C36 H36A 109.1 . . ?
C31 C36 H36A 109.1 . . ?
C35 C36 H36B 109.1 . . ?
C31 C36 H36B 109.1 . . ?
H36A C36 H36B 107.8 . . ?
N4 Hf2 N5 111.84(12) . . ?
N4 Hf2 N6 110.65(12) . . ?
N5 Hf2 N6 112.14(12) . . ?
N4 Hf2 Cl2 106.80(8) . . ?
N5 Hf2 Cl2 105.70(9) . . ?
N6 Hf2 Cl2 109.44(10) . . ?
C37 N4 C43 114.6(3) . . ?
C37 N4 Hf2 138.2(2) . . ?
C43 N4 Hf2 106.7(2) . . ?
C49 N5 C55 114.5(3) . . ?
C49 N5 Hf2 139.1(2) . . ?
C55 N5 Hf2 105.9(2) . . ?
C61 N6 C67 116.4(3) . . ?
C61 N6 Hf2 136.1(3) . . ?
C67 N6 Hf2 107.4(2) . . ?
N4 C37 C38A 113.4(4) . . ?
N4 C37 C42B 111.3(4) . . ?
N4 C37 C38B 110.5(4) . . ?
C42B C37 C38B 109.0(6) . . ?
N4 C37 C42A 111.7(4) . . ?
C38A C37 C42A 108.8(5) . . ?
N4 C37 H37 107.6 . . ?
C38A C37 H37 107.6 . . ?
C42A C37 H37 107.6 . . ?
N4 C37 H37A 108.7 . . ?
C42B C37 H37A 108.7 . . ?
C38B C37 H37A 108.7 . . ?
N4 C43 C44 113.8(3) . . ?
N4 C43 C48 115.0(3) . . ?
C44 C43 C48 109.1(3) . . ?
N4 C43 Hf2 43.19(14) . . ?
C44 C43 Hf2 116.3(2) . . ?
C48 C43 Hf2 134.6(2) . . ?
N4 C43 H43 106.0 . . ?
C44 C43 H43 106.0 . . ?
C48 C43 H43 106.0 . . ?
Hf2 C43 H43 63.9 . . ?
C45 C44 C43 110.9(3) . . ?
C45 C44 H44A 109.5 . . ?
C43 C44 H44A 109.5 . . ?
C45 C44 H44B 109.5 . . ?
C43 C44 H44B 109.5 . . ?
H44A C44 H44B 108.0 . . ?
C46 C45 C44 111.6(4) . . ?
C46 C45 H45A 109.3 . . ?
C44 C45 H45A 109.3 . . ?
C46 C45 H45B 109.3 . . ?
C44 C45 H45B 109.3 . . ?
H45A C45 H45B 108.0 . . ?
C45 C46 C47 111.7(4) . . ?
C45 C46 H46A 109.3 . . ?
C47 C46 H46A 109.3 . . ?
C45 C46 H46B 109.3 . . ?
C47 C46 H46B 109.3 . . ?
H46A C46 H46B 107.9 . . ?
C48 C47 C46 111.1(3) . . ?
C48 C47 H47A 109.4 . . ?
C46 C47 H47A 109.4 . . ?
C48 C47 H47B 109.4 . . ?
C46 C47 H47B 109.4 . . ?
H47A C47 H47B 108.0 . . ?
C47 C48 C43 111.0(3) . . ?
C47 C48 H48A 109.4 . . ?
C43 C48 H48A 109.4 . . ?
C47 C48 H48B 109.4 . . ?
C43 C48 H48B 109.4 . . ?
H48A C48 H48B 108.0 . . ?
N5 C49 C50 111.6(3) . . ?
N5 C49 C54 113.2(3) . . ?
C50 C49 C54 110.0(3) . . ?
N5 C49 H49 107.2 . . ?
C50 C49 H49 107.2 . . ?
C54 C49 H49 107.2 . . ?
C51 C50 C49 112.5(4) . . ?
C51 C50 H50A 109.1 . . ?
C49 C50 H50A 109.1 . . ?
C51 C50 H50B 109.1 . . ?
C49 C50 H50B 109.1 . . ?
H50A C50 H50B 107.8 . . ?
C50 C51 C52 112.1(4) . . ?
C50 C51 H51A 109.2 . . ?
C52 C51 H51A 109.2 . . ?
C50 C51 H51B 109.2 . . ?
C52 C51 H51B 109.2 . . ?
H51A C51 H51B 107.9 . . ?
C51 C52 C53 111.2(4) . . ?
C51 C52 H52A 109.4 . . ?
C53 C52 H52A 109.4 . . ?
C51 C52 H52B 109.4 . . ?
C53 C52 H52B 109.4 . . ?
H52A C52 H52B 108.0 . . ?
C52 C53 C54 111.4(3) . . ?
C52 C53 H53A 109.3 . . ?
C54 C53 H53A 109.3 . . ?
C52 C53 H53B 109.3 . . ?
C54 C53 H53B 109.3 . . ?
H53A C53 H53B 108.0 . . ?
C49 C54 C53 112.0(3) . . ?
C49 C54 H54A 109.2 . . ?
C53 C54 H54A 109.2 . . ?
C49 C54 H54B 109.2 . . ?
C53 C54 H54B 109.2 . . ?
H54A C54 H54B 107.9 . . ?
N5 C55 C56 114.5(3) . . ?
N5 C55 C60 113.6(3) . . ?
C56 C55 C60 109.2(3) . . ?
N5 C55 Hf2 43.71(15) . . ?
C56 C55 Hf2 118.9(2) . . ?
C60 C55 Hf2 131.9(2) . . ?
N5 C55 H55 106.3 . . ?
C56 C55 H55 106.3 . . ?
C60 C55 H55 106.3 . . ?
Hf2 C55 H55 63.3 . . ?
C57 C56 C55 110.9(3) . . ?
C57 C56 H56A 109.5 . . ?
C55 C56 H56A 109.5 . . ?
C57 C56 H56B 109.5 . . ?
C55 C56 H56B 109.5 . . ?
H56A C56 H56B 108.0 . . ?
C56 C57 C58 111.1(4) . . ?
C56 C57 H57A 109.4 . . ?
C58 C57 H57A 109.4 . . ?
C56 C57 H57B 109.4 . . ?
C58 C57 H57B 109.4 . . ?
H57A C57 H57B 108.0 . . ?
C57 C58 C59 110.6(4) . . ?
C57 C58 H58A 109.5 . . ?
C59 C58 H58A 109.5 . . ?
C57 C58 H58B 109.5 . . ?
C59 C58 H58B 109.5 . . ?
H58A C58 H58B 108.1 . . ?
C60 C59 C58 111.4(4) . . ?
C60 C59 H59A 109.3 . . ?
C58 C59 H59A 109.3 . . ?
C60 C59 H59B 109.3 . . ?
C58 C59 H59B 109.3 . . ?
H59A C59 H59B 108.0 . . ?
C59 C60 C55 112.4(4) . . ?
C59 C60 H60A 109.1 . . ?
C55 C60 H60A 109.1 . . ?
C59 C60 H60B 109.1 . . ?
C55 C60 H60B 109.1 . . ?
H60A C60 H60B 107.9 . . ?
N6 C61 C66 114.4(3) . . ?
N6 C61 C62 110.1(3) . . ?
C66 C61 C62 110.0(3) . . ?
N6 C61 Hf2 25.73(16) . . ?
C66 C61 Hf2 113.7(3) . . ?
C62 C61 Hf2 87.5(2) . . ?
N6 C61 H61 107.4 . . ?
C66 C61 H61 107.4 . . ?
C62 C61 H61 107.4 . . ?
Hf2 C61 H61 127.9 . . ?
C63 C62 C61 113.1(4) . . ?
C63 C62 H62A 109.0 . . ?
C61 C62 H62A 109.0 . . ?
C63 C62 H62B 109.0 . . ?
C61 C62 H62B 109.0 . . ?
H62A C62 H62B 107.8 . . ?
C64 C63 C62 111.0(4) . . ?
C64 C63 H63A 109.4 . . ?
C62 C63 H63A 109.4 . . ?
C64 C63 H63B 109.4 . . ?
C62 C63 H63B 109.4 . . ?
H63A C63 H63B 108.0 . . ?
C63 C64 C65 110.3(5) . . ?
C63 C64 H64A 109.6 . . ?
C65 C64 H64A 109.6 . . ?
C63 C64 H64B 109.6 . . ?
C65 C64 H64B 109.6 . . ?
H64A C64 H64B 108.1 . . ?
C64 C65 C66 111.2(4) . . ?
C64 C65 H65A 109.4 . . ?
C66 C65 H65A 109.4 . . ?
C64 C65 H65B 109.4 . . ?
C66 C65 H65B 109.4 . . ?
H65A C65 H65B 108.0 . . ?
C61 C66 C65 111.9(5) . . ?
C61 C66 H66A 109.2 . . ?
C65 C66 H66A 109.2 . . ?
C61 C66 H66B 109.2 . . ?
C65 C66 H66B 109.2 . . ?
H66A C66 H66B 107.9 . . ?
N6 C67 C68 114.9(4) . . ?
N6 C67 C72 115.0(3) . . ?
C68 C67 C72 109.6(4) . . ?
N6 C67 Hf2 42.73(16) . . ?
C68 C67 Hf2 138.8(3) . . ?
C72 C67 Hf2 111.6(3) . . ?
N6 C67 H67 105.4 . . ?
C68 C67 H67 105.4 . . ?
C72 C67 H67 105.4 . . ?
Hf2 C67 H67 65.3 . . ?
C67 C68 C69 110.1(4) . . ?
C67 C68 H68A 109.6 . . ?
C69 C68 H68A 109.6 . . ?
C67 C68 H68B 109.6 . . ?
C69 C68 H68B 109.6 . . ?
H68A C68 H68B 108.2 . . ?
C70 C69 C68 112.8(6) . . ?
C70 C69 H69A 109.0 . . ?
C68 C69 H69A 109.0 . . ?
C70 C69 H69B 109.0 . . ?
C68 C69 H69B 109.0 . . ?
H69A C69 H69B 107.8 . . ?
C71 C70 C69 111.5(5) . . ?
C71 C70 H70A 109.3 . . ?
C69 C70 H70A 109.3 . . ?
C71 C70 H70B 109.3 . . ?
C69 C70 H70B 109.3 . . ?
H70A C70 H70B 108.0 . . ?
C70 C71 C72 111.6(6) . . ?
C70 C71 H71A 109.3 . . ?
C72 C71 H71A 109.3 . . ?
C70 C71 H71B 109.3 . . ?
C72 C71 H71B 109.3 . . ?
H71A C71 H71B 108.0 . . ?
C71 C72 C67 111.1(4) . . ?
C71 C72 H72A 109.4 . . ?
C67 C72 H72A 109.4 . . ?
C71 C72 H72B 109.4 . . ?
C67 C72 H72B 109.4 . . ?
H72A C72 H72B 108.0 . . ?
C37 C38A C39A 112.1(7) . . ?
C37 C38A H38A 109.2 . . ?
C39A C38A H38A 109.2 . . ?
C37 C38A H38B 109.2 . . ?
C39A C38A H38B 109.2 . . ?
H38A C38A H38B 107.9 . . ?
C40A C39A C38A 111.0(9) . . ?
C40A C39A H39A 109.4 . . ?
C38A C39A H39A 109.4 . . ?
C40A C39A H39B 109.4 . . ?
C38A C39A H39B 109.4 . . ?
H39A C39A H39B 108.0 . . ?
C41A C40A C39A 110.5(7) . . ?
C41A C40A H40A 109.5 . . ?
C39A C40A H40A 109.5 . . ?
C41A C40A H40B 109.5 . . ?
C39A C40A H40B 109.5 . . ?
H40A C40A H40B 108.1 . . ?
C40A C41A C42A 111.3(7) . . ?
C40A C41A H41A 109.4 . . ?
C42A C41A H41A 109.4 . . ?
C40A C41A H41B 109.4 . . ?
C42A C41A H41B 109.4 . . ?
H41A C41A H41B 108.0 . . ?
C41A C42A C37 110.1(7) . . ?
C41A C42A H42A 109.6 . . ?
C37 C42A H42A 109.6 . . ?
C41A C42A H42B 109.6 . . ?
C37 C42A H42B 109.6 . . ?
H42A C42A H42B 108.2 . . ?
C39B C38B C37 111.5(6) . . ?
C39B C38B H38C 109.3 . . ?
C37 C38B H38C 109.3 . . ?
C39B C38B H38D 109.3 . . ?
C37 C38B H38D 109.3 . . ?
H38C C38B H38D 108.0 . . ?
C40B C39B C38B 110.4(8) . . ?
C40B C39B H39C 109.6 . . ?
C38B C39B H39C 109.6 . . ?
C40B C39B H39D 109.6 . . ?
C38B C39B H39D 109.6 . . ?
H39C C39B H39D 108.1 . . ?
C41B C40B C39B 112.6(9) . . ?
C41B C40B H40C 109.1 . . ?
C39B C40B H40C 109.1 . . ?
C41B C40B H40D 109.1 . . ?
C39B C40B H40D 109.1 . . ?
H40C C40B H40D 107.8 . . ?
C40B C41B C42B 111.4(9) . . ?
C40B C41B H41C 109.3 . . ?
C42B C41B H41C 109.3 . . ?
C40B C41B H41D 109.3 . . ?
C42B C41B H41D 109.3 . . ?
H41C C41B H41D 108.0 . . ?
C37 C42B C41B 111.0(7) . . ?
C37 C42B H42C 109.4 . . ?
C41B C42B H42C 109.4 . . ?
C37 C42B H42D 109.4 . . ?
C41B C42B H42D 109.4 . . ?
H42C C42B H42D 108.0 . . ?
 
loop_
 _geom_torsion_atom_site_label_1
 _geom_torsion_atom_site_label_2
 _geom_torsion_atom_site_label_3
 _geom_torsion_atom_site_label_4
 _geom_torsion
 _geom_torsion_site_symmetry_1
 _geom_torsion_site_symmetry_2
 _geom_torsion_site_symmetry_3
 _geom_torsion_site_symmetry_4
 _geom_torsion_publ_flag
C7 N1 C1 C6 -79.4(4) . . . . ?
Hf1 N1 C1 C6 97.2(4) . . . . ?
C7 N1 C1 C2 156.6(3) . . . . ?
Hf1 N1 C1 C2 -26.9(4) . . . . ?
C7 N1 C1 Hf1 -176.5(5) . . . . ?
N1 C1 C2 C3 179.3(3) . . . . ?
C6 C1 C2 C3 53.3(4) . . . . ?
Hf1 C1 C2 C3 167.7(3) . . . . ?
C1 C2 C3 C4 -54.2(4) . . . . ?
C2 C3 C4 C5 55.4(4) . . . . ?
C3 C4 C5 C6 -57.0(5) . . . . ?
N1 C1 C6 C5 -177.9(3) . . . . ?
C2 C1 C6 C5 -54.7(4) . . . . ?
Hf1 C1 C6 C5 -149.0(3) . . . . ?
C4 C5 C6 C1 57.4(5) . . . . ?
C1 N1 C7 C12 -43.0(4) . . . . ?
Hf1 N1 C7 C12 139.6(3) . . . . ?
C1 N1 C7 C8 84.8(4) . . . . ?
Hf1 N1 C7 C8 -92.6(3) . . . . ?
C1 N1 C7 Hf1 177.4(4) . . . . ?
N1 C7 C8 C9 170.1(3) . . . . ?
C12 C7 C8 C9 -59.1(4) . . . . ?
Hf1 C7 C8 C9 124.3(3) . . . . ?
C7 C8 C9 C10 57.8(5) . . . . ?
C8 C9 C10 C11 -55.0(5) . . . . ?
C9 C10 C11 C12 54.8(5) . . . . ?
N1 C7 C12 C11 -171.0(3) . . . . ?
C8 C7 C12 C11 57.9(4) . . . . ?
Hf1 C7 C12 C11 -127.1(4) . . . . ?
C10 C11 C12 C7 -56.3(4) . . . . ?
C19 N2 C13 C18 110.7(3) . . . . ?
Hf1 N2 C13 C18 -77.3(4) . . . . ?
C19 N2 C13 C14 -125.6(3) . . . . ?
Hf1 N2 C13 C14 46.4(4) . . . . ?
N2 C13 C14 C15 179.3(3) . . . . ?
C18 C13 C14 C15 -56.2(4) . . . . ?
C13 C14 C15 C16 55.9(5) . . . . ?
C14 C15 C16 C17 -54.8(5) . . . . ?
C15 C16 C17 C18 54.1(5) . . . . ?
N2 C13 C18 C17 -179.4(3) . . . . ?
C14 C13 C18 C17 56.3(4) . . . . ?
C16 C17 C18 C13 -55.3(4) . . . . ?
C13 N2 C19 C24 -56.2(3) . . . . ?
Hf1 N2 C19 C24 129.4(2) . . . . ?
C13 N2 C19 C20 69.9(3) . . . . ?
Hf1 N2 C19 C20 -104.5(3) . . . . ?
C13 N2 C19 Hf1 174.4(3) . . . . ?
N2 C19 C20 C21 175.7(3) . . . . ?
C24 C19 C20 C21 -55.8(4) . . . . ?
Hf1 C19 C20 C21 128.6(3) . . . . ?
C19 C20 C21 C22 55.0(4) . . . . ?
C20 C21 C22 C23 -54.7(4) . . . . ?
C21 C22 C23 C24 56.3(4) . . . . ?
C22 C23 C24 C19 -58.0(4) . . . . ?
N2 C19 C24 C23 -175.2(3) . . . . ?
C20 C19 C24 C23 57.1(3) . . . . ?
Hf1 C19 C24 C23 -128.4(3) . . . . ?
C31 N3 C25 C26 131.2(3) . . . . ?
Hf1 N3 C25 C26 -59.5(4) . . . . ?
C31 N3 C25 C30 -103.3(3) . . . . ?
Hf1 N3 C25 C30 65.9(4) . . . . ?
N3 C25 C26 C27 -178.3(3) . . . . ?
C30 C25 C26 C27 54.7(4) . . . . ?
C25 C26 C27 C28 -55.4(5) . . . . ?
C26 C27 C28 C29 55.4(5) . . . . ?
C27 C28 C29 C30 -55.1(5) . . . . ?
C28 C29 C30 C25 55.2(4) . . . . ?
N3 C25 C30 C29 179.7(3) . . . . ?
C26 C25 C30 C29 -54.7(4) . . . . ?
C25 N3 C31 C36 -61.8(4) . . . . ?
Hf1 N3 C31 C36 125.6(2) . . . . ?
C25 N3 C31 C32 65.0(4) . . . . ?
Hf1 N3 C31 C32 -107.6(3) . . . . ?
C25 N3 C31 Hf1 172.6(3) . . . . ?
N3 C31 C32 C33 175.2(3) . . . . ?
C36 C31 C32 C33 -55.8(4) . . . . ?
Hf1 C31 C32 C33 127.2(3) . . . . ?
C31 C32 C33 C34 58.5(4) . . . . ?
C32 C33 C34 C35 -56.3(4) . . . . ?
C33 C34 C35 C36 53.7(4) . . . . ?
C34 C35 C36 C31 -53.0(4) . . . . ?
N3 C31 C36 C35 -178.3(3) . . . . ?
C32 C31 C36 C35 53.0(4) . . . . ?
Hf1 C31 C36 C35 -130.5(3) . . . . ?
C43 N4 C37 C38A 144.3(5) . . . . ?
Hf2 N4 C37 C38A -45.2(6) . . . . ?
C43 N4 C37 C42B -125.5(6) . . . . ?
Hf2 N4 C37 C42B 45.0(7) . . . . ?
C43 N4 C37 C38B 113.2(5) . . . . ?
Hf2 N4 C37 C38B -76.2(5) . . . . ?
C43 N4 C37 C42A -92.4(5) . . . . ?
Hf2 N4 C37 C42A 78.2(5) . . . . ?
C37 N4 C43 C44 69.8(4) . . . . ?
Hf2 N4 C43 C44 -103.7(3) . . . . ?
C37 N4 C43 C48 -57.2(4) . . . . ?
Hf2 N4 C43 C48 129.3(2) . . . . ?
C37 N4 C43 Hf2 173.4(3) . . . . ?
N4 C43 C44 C45 171.9(3) . . . . ?
C48 C43 C44 C45 -58.1(4) . . . . ?
Hf2 C43 C44 C45 124.0(3) . . . . ?
C43 C44 C45 C46 56.5(5) . . . . ?
C44 C45 C46 C47 -53.9(5) . . . . ?
C45 C46 C47 C48 53.9(5) . . . . ?
C46 C47 C48 C43 -56.5(5) . . . . ?
N4 C43 C48 C47 -172.3(3) . . . . ?
C44 C43 C48 C47 58.4(4) . . . . ?
Hf2 C43 C48 C47 -124.3(3) . . . . ?
C55 N5 C49 C50 132.7(3) . . . . ?
Hf2 N5 C49 C50 -57.0(5) . . . . ?
C55 N5 C49 C54 -102.5(3) . . . . ?
Hf2 N5 C49 C54 67.8(4) . . . . ?
N5 C49 C50 C51 -178.9(3) . . . . ?
C54 C49 C50 C51 54.5(5) . . . . ?
C49 C50 C51 C52 -54.8(5) . . . . ?
C50 C51 C52 C53 53.9(5) . . . . ?
C51 C52 C53 C54 -54.0(5) . . . . ?
N5 C49 C54 C53 179.7(3) . . . . ?
C50 C49 C54 C53 -54.7(4) . . . . ?
C52 C53 C54 C49 55.2(4) . . . . ?
C49 N5 C55 C56 66.3(4) . . . . ?
Hf2 N5 C55 C56 -107.0(3) . . . . ?
C49 N5 C55 C60 -60.0(4) . . . . ?
Hf2 N5 C55 C60 126.6(3) . . . . ?
C49 N5 C55 Hf2 173.4(3) . . . . ?
N5 C55 C56 C57 174.1(3) . . . . ?
C60 C55 C56 C57 -57.3(4) . . . . ?
Hf2 C55 C56 C57 125.1(3) . . . . ?
C55 C56 C57 C58 58.6(5) . . . . ?
C56 C57 C58 C59 -56.2(6) . . . . ?
C57 C58 C59 C60 54.2(6) . . . . ?
C58 C59 C60 C55 -54.9(6) . . . . ?
N5 C55 C60 C59 -175.0(3) . . . . ?
C56 C55 C60 C59 55.9(4) . . . . ?
Hf2 C55 C60 C59 -126.9(3) . . . . ?
C67 N6 C61 C66 -81.9(4) . . . . ?
Hf2 N6 C61 C66 94.4(4) . . . . ?
C67 N6 C61 C62 153.7(3) . . . . ?
Hf2 N6 C61 C62 -30.0(5) . . . . ?
C67 N6 C61 Hf2 -176.3(5) . . . . ?
N6 C61 C62 C63 -179.4(4) . . . . ?
C66 C61 C62 C63 53.7(5) . . . . ?
Hf2 C61 C62 C63 168.1(3) . . . . ?
C61 C62 C63 C64 -55.7(5) . . . . ?
C62 C63 C64 C65 56.2(6) . . . . ?
C63 C64 C65 C66 -56.9(7) . . . . ?
N6 C61 C66 C65 -178.2(4) . . . . ?
C62 C61 C66 C65 -53.7(5) . . . . ?
Hf2 C61 C66 C65 -149.9(3) . . . . ?
C64 C65 C66 C61 56.4(7) . . . . ?
C61 N6 C67 C68 -46.7(5) . . . . ?
Hf2 N6 C67 C68 136.0(3) . . . . ?
C61 N6 C67 C72 81.9(5) . . . . ?
Hf2 N6 C67 C72 -95.3(4) . . . . ?
C61 N6 C67 Hf2 177.3(4) . . . . ?
N6 C67 C68 C69 -171.5(4) . . . . ?
C72 C67 C68 C69 57.3(6) . . . . ?
Hf2 C67 C68 C69 -125.8(5) . . . . ?
C67 C68 C69 C70 -55.4(6) . . . . ?
C68 C69 C70 C71 53.0(6) . . . . ?
C69 C70 C71 C72 -53.0(6) . . . . ?
C70 C71 C72 C67 56.4(6) . . . . ?
N6 C67 C72 C71 170.2(4) . . . . ?
C68 C67 C72 C71 -58.5(6) . . . . ?
Hf2 C67 C72 C71 123.7(4) . . . . ?
N4 C37 C38A C39A -178.0(7) . . . . ?
C42A C37 C38A C39A 57.0(10) . . . . ?
C37 C38A C39A C40A -57.2(11) . . . . ?
C38A C39A C40A C41A 55.7(10) . . . . ?
C39A C40A C41A C42A -57.3(10) . . . . ?
C40A C41A C42A C37 58.1(10) . . . . ?
N4 C37 C42A C41A 176.8(5) . . . . ?
C38A C37 C42A C41A -57.2(8) . . . . ?
N4 C37 C38B C39B 179.9(6) . . . . ?
C42B C37 C38B C39B 57.3(9) . . . . ?
C37 C38B C39B C40B -55.7(12) . . . . ?
C38B C39B C40B C41B 54.7(13) . . . . ?
C39B C40B C41B C42B -55.2(13) . . . . ?
N4 C37 C42B C41B -179.0(8) . . . . ?
C38B C37 C42B C41B -56.9(10) . . . . ?
C40B C41B C42B C37 56.8(13) . . . . ?
 
_refine_diff_density_max    2.833
_refine_diff_density_min   -3.685
_refine_diff_density_rms    0.121

_shelx_res_file
;

    ca350.res created by SHELXL-2014/7

TITL HfCl(N(C6H11)2)3 in P-1
CELL 0.71073 9.7839 10.4952 39.8958 86.246 83.4103 62.6492
ZERR 4 0.0003 0.0003 0.0011 0.0014 0.0013 0.0013
LATT 1
SFAC C H N Cl Hf
UNIT 144 264 12 4 4

L.S. 10
PLAN  100
SIZE 0.16 0.06 0.04
TEMP -173
CONN 4 2 $Hf
BOND $H
CONF
fmap 2
acta
SHEL 20 0.71
OMIT 0 0 2
REM <olex2.extras>
REM <HklSrc "%.\\ca350.hkl">
REM </olex2.extras>

WGHT    0.020000   10.000000
FVAR       0.05512
HF1   5    0.380551    0.352808    0.134422    11.00000    0.01112    0.01114 =
         0.01336   -0.00080   -0.00198   -0.00456
CL1   4    0.374166    0.154791    0.167090    11.00000    0.02381    0.01465 =
         0.02405    0.00262   -0.00426   -0.01026
N1    3    0.444188    0.295980    0.084944    11.00000    0.01365    0.01605 =
         0.01508   -0.00414   -0.00058   -0.00496
N2    3    0.164232    0.517037    0.139814    11.00000    0.01324    0.01194 =
         0.01376    0.00057   -0.00285   -0.00370
N3    3    0.532391    0.398538    0.154953    11.00000    0.01349    0.01035 =
         0.01750   -0.00191   -0.00134   -0.00590
C1    1    0.539146    0.325318    0.057154    11.00000    0.01866    0.02022 =
         0.01419    0.00164   -0.00148   -0.00807
AFIX  13
H1    2    0.489839    0.335292    0.035880    11.00000   -1.20000
AFIX   0
C2    1    0.536599    0.469146    0.063270    11.00000    0.02423    0.01692 =
         0.02896    0.00413   -0.00520   -0.00712
AFIX  23
H2A   2    0.575826    0.464788    0.085330    11.00000   -1.20000
H2B   2    0.428544    0.545904    0.064309    11.00000   -1.20000
AFIX   0
C3    1    0.634808    0.507019    0.035574    11.00000    0.04451    0.03105 =
         0.02832    0.01081   -0.01309   -0.02586
AFIX  23
H3A   2    0.587155    0.525029    0.014050    11.00000   -1.20000
H3B   2    0.636786    0.596109    0.041622    11.00000   -1.20000
AFIX   0
C4    1    0.800341    0.386306    0.030851    11.00000    0.04289    0.04198 =
         0.02224   -0.00860    0.00774   -0.03252
AFIX  23
H4A   2    0.858780    0.410797    0.011805    11.00000   -1.20000
H4B   2    0.852362    0.375335    0.051488    11.00000   -1.20000
AFIX   0
C5    1    0.799522    0.245555    0.023747    11.00000    0.04095    0.04059 =
         0.03210   -0.01572    0.01842   -0.03099
AFIX  23
H5A   2    0.907029    0.167708    0.021571    11.00000   -1.20000
H5B   2    0.755270    0.254370    0.002105    11.00000   -1.20000
AFIX   0
C6    1    0.704789    0.207032    0.051994    11.00000    0.02265    0.02153 =
         0.02701   -0.00814    0.00937   -0.00985
AFIX  23
H6A   2    0.704032    0.116883    0.046374    11.00000   -1.20000
H6B   2    0.754096    0.190518    0.073256    11.00000   -1.20000
AFIX   0
C7    1    0.380832    0.196342    0.077690    11.00000    0.01499    0.02446 =
         0.01761   -0.00880    0.00221   -0.00898
AFIX  13
H7    2    0.290993    0.217363    0.094987    11.00000   -1.20000
AFIX   0
C8    1    0.491035    0.035246    0.082028    11.00000    0.02301    0.02282 =
         0.03460   -0.01225    0.00792   -0.01211
AFIX  23
H8A   2    0.578194    0.005659    0.064118    11.00000   -1.20000
H8B   2    0.533958    0.018363    0.104112    11.00000   -1.20000
AFIX   0
C9    1    0.405700   -0.055878    0.080092    11.00000    0.03506    0.03353 =
         0.04205   -0.01690    0.01466   -0.02318
AFIX  23
H9A   2    0.479080   -0.158796    0.082388    11.00000   -1.20000
H9B   2    0.323025   -0.031033    0.098942    11.00000   -1.20000
AFIX   0
C10   1    0.335802   -0.029706    0.046913    11.00000    0.06172    0.05942 =
         0.03799   -0.02811    0.01603   -0.04778
AFIX  23
H10A  2    0.275553   -0.083926    0.046845    11.00000   -1.20000
H10B  2    0.419672   -0.065613    0.028288    11.00000   -1.20000
AFIX   0
C11   1    0.230424    0.129358    0.040899    11.00000    0.03787    0.07986 =
         0.02153   -0.01179   -0.00093   -0.04029
AFIX  23
H11A  2    0.139256    0.162277    0.057825    11.00000   -1.20000
H11B  2    0.193214    0.142968    0.018252    11.00000   -1.20000
AFIX   0
C12   1    0.315129    0.220753    0.043343    11.00000    0.02595    0.04872 =
         0.01480   -0.01242    0.00191   -0.01984
AFIX  23
H12A  2    0.400326    0.194580    0.025032    11.00000   -1.20000
H12B  2    0.242341    0.323519    0.040492    11.00000   -1.20000
AFIX   0
C13   1    0.047401    0.619364    0.118174    11.00000    0.01217    0.01508 =
         0.01483   -0.00044   -0.00355   -0.00332
AFIX  13
H13   2   -0.054057    0.663588    0.132277    11.00000   -1.20000
AFIX   0
C14   1    0.029064    0.543468    0.088912    11.00000    0.03880    0.02038 =
         0.03125    0.00107   -0.02015   -0.01169
AFIX  23
H14A  2   -0.001184    0.468911    0.097898    11.00000   -1.20000
H14B  2    0.129169    0.495588    0.074980    11.00000   -1.20000
AFIX   0
C15   1   -0.094085    0.650672    0.066901    11.00000    0.04225    0.02887 =
         0.03397    0.00069   -0.02405   -0.01379
AFIX  23
H15A  2   -0.099777    0.599851    0.047467    11.00000   -1.20000
H15B  2   -0.196187    0.690595    0.080264    11.00000   -1.20000
AFIX   0
C16   1   -0.059001    0.771081    0.054153    11.00000    0.03633    0.02295 =
         0.01786    0.00146   -0.00873    0.00062
AFIX  23
H16A  2   -0.144797    0.841256    0.041552    11.00000   -1.20000
H16B  2    0.036220    0.732682    0.038378    11.00000   -1.20000
AFIX   0
C17   1   -0.037296    0.846406    0.082745    11.00000    0.02878    0.01732 =
         0.02647    0.00744   -0.00896   -0.00830
AFIX  23
H17A  2   -0.136797    0.896420    0.096767    11.00000   -1.20000
H17B  2   -0.005390    0.919324    0.073290    11.00000   -1.20000
AFIX   0
C18   1    0.085636    0.739279    0.104929    11.00000    0.02357    0.01961 =
         0.02900    0.00308   -0.00759   -0.01025
AFIX  23
H18A  2    0.187713    0.697771    0.091559    11.00000   -1.20000
H18B  2    0.092214    0.790461    0.124186    11.00000   -1.20000
AFIX   0
C19   1    0.106720    0.521714    0.176109    11.00000    0.01096    0.01444 =
         0.01447   -0.00080   -0.00139   -0.00578
AFIX  13
H19   2    0.198098    0.457099    0.188409    11.00000   -1.20000
AFIX   0
C20   1   -0.010854    0.462285    0.183006    11.00000    0.01339    0.01833 =
         0.02029   -0.00195   -0.00115   -0.00870
AFIX  23
H20A  2   -0.103444    0.523160    0.171136    11.00000   -1.20000
H20B  2    0.034978    0.364220    0.173891    11.00000   -1.20000
AFIX   0
C21   1   -0.059281    0.457677    0.220627    11.00000    0.02177    0.02842 =
         0.02318    0.00344   -0.00074   -0.01470
AFIX  23
H21A  2    0.030610    0.387368    0.232118    11.00000   -1.20000
H21B  2   -0.140529    0.425496    0.223869    11.00000   -1.20000
AFIX   0
C22   1   -0.120571    0.604808    0.236484    11.00000    0.02113    0.03798 =
         0.02005   -0.00573    0.00502   -0.01560
AFIX  23
H22A  2   -0.218108    0.672257    0.227055    11.00000   -1.20000
H22B  2   -0.143283    0.596786    0.261138    11.00000   -1.20000
AFIX   0
C23   1   -0.003340    0.663408    0.229719    11.00000    0.02133    0.03087 =
         0.01616   -0.00709    0.00071   -0.01306
AFIX  23
H23A  2    0.090499    0.600991    0.241046    11.00000   -1.20000
H23B  2   -0.047754    0.760704    0.239211    11.00000   -1.20000
AFIX   0
C24   1    0.040501    0.670120    0.191812    11.00000    0.01407    0.01457 =
         0.01911   -0.00264   -0.00248   -0.00556
AFIX  23
H24A  2    0.118161    0.706596    0.188010    11.00000   -1.20000
H24B  2   -0.052123    0.737580    0.180712    11.00000   -1.20000
AFIX   0
C25   1    0.530829    0.513697    0.174592    11.00000    0.01595    0.01529 =
         0.02051   -0.00193   -0.00417   -0.00851
AFIX  13
H25   2    0.640863    0.487976    0.177337    11.00000   -1.20000
AFIX   0
C26   1    0.463988    0.656547    0.155379    11.00000    0.03225    0.01756 =
         0.02895    0.00088   -0.01065   -0.01214
AFIX  23
H26A  2    0.356276    0.683083    0.151219    11.00000   -1.20000
H26B  2    0.524928    0.646097    0.133229    11.00000   -1.20000
AFIX   0
C27   1    0.466049    0.776255    0.175012    11.00000    0.04426    0.01754 =
         0.05174   -0.00108   -0.02050   -0.01483
AFIX  23
H27A  2    0.574467    0.755227    0.176863    11.00000   -1.20000
H27B  2    0.415939    0.868301    0.162513    11.00000   -1.20000
AFIX   0
C28   1    0.382049    0.790555    0.210260    11.00000    0.03169    0.03120 =
         0.04912   -0.02120   -0.01312   -0.00853
AFIX  23
H28A  2    0.391402    0.864141    0.222776    11.00000   -1.20000
H28B  2    0.270876    0.822686    0.208431    11.00000   -1.20000
AFIX   0
C29   1    0.448677    0.648627    0.229637    11.00000    0.02168    0.03824 =
         0.03020   -0.01850   -0.00126   -0.01067
AFIX  23
H29A  2    0.387402    0.659397    0.251753    11.00000   -1.20000
H29B  2    0.556258    0.622357    0.233853    11.00000   -1.20000
AFIX   0
C30   1    0.446982    0.528827    0.210047    11.00000    0.01811    0.02576 =
         0.02340   -0.00744   -0.00379   -0.00921
AFIX  23
H30A  2    0.338574    0.549612    0.208280    11.00000   -1.20000
H30B  2    0.497274    0.436934    0.222595    11.00000   -1.20000
AFIX   0
C31   1    0.682508    0.266402    0.152662    11.00000    0.01401    0.01344 =
         0.01702   -0.00110   -0.00406   -0.00519
AFIX  13
H31   2    0.669632    0.198499    0.138391    11.00000   -1.20000
AFIX   0
C32   1    0.725977    0.190036    0.186686    11.00000    0.02258    0.01615 =
         0.02098    0.00298   -0.00750   -0.00851
AFIX  23
H32A  2    0.740574    0.253145    0.201770    11.00000   -1.20000
H32B  2    0.640597    0.170975    0.197367    11.00000   -1.20000
AFIX   0
C33   1    0.874156    0.048619    0.182486    11.00000    0.03020    0.01485 =
         0.03201    0.00340   -0.01457   -0.00594
AFIX  23
H33A  2    0.899746    0.002381    0.204891    11.00000   -1.20000
H33B  2    0.857536   -0.016756    0.168539    11.00000   -1.20000
AFIX   0
C34   1    1.008401    0.072530    0.165828    11.00000    0.02149    0.02526 =
         0.03548   -0.00570   -0.00951   -0.00189
AFIX  23
H34A  2    1.031826    0.130247    0.180753    11.00000   -1.20000
H34B  2    1.101461   -0.021031    0.162309    11.00000   -1.20000
AFIX   0
C35   1    0.968384    0.150026    0.132125    11.00000    0.01578    0.02792 =
         0.03143   -0.00966   -0.00315   -0.00549
AFIX  23
H35A  2    0.960421    0.085583    0.116257    11.00000   -1.20000
H35B  2    1.053099    0.172381    0.122649    11.00000   -1.20000
AFIX   0
C36   1    0.816943    0.288910    0.134976    11.00000    0.01755    0.02453 =
         0.01683   -0.00127   -0.00365   -0.00982
AFIX  23
H36A  2    0.791544    0.329207    0.112078    11.00000   -1.20000
H36B  2    0.830595    0.359540    0.147683    11.00000   -1.20000
AFIX   0

HF2   5    0.257657    0.845359    0.367217    11.00000    0.01795    0.01534 =
         0.01681   -0.00238   -0.00047   -0.00962
CL2   4    0.456377    0.644030    0.336251    11.00000    0.02722    0.02003 =
         0.03691   -0.01112   -0.00210   -0.00361
N4    3    0.313919    1.008283    0.359335    11.00000    0.01707    0.01748 =
         0.01551   -0.00361    0.00130   -0.01030
N5    3    0.058455    0.889556    0.347492    11.00000    0.02115    0.01756 =
         0.01711   -0.00164   -0.00168   -0.01211
N6    3    0.250347    0.792368    0.417199    11.00000    0.02736    0.02400 =
         0.01947    0.00282   -0.00442   -0.01704
C37   1    0.336538    1.108597    0.379520    11.00000    0.02354    0.01885 =
         0.01687   -0.00467   -0.00016   -0.01450
PART 1
AFIX  13
H37   2    0.334316    1.188592    0.364155    10.50000   -1.20000
AFIX  13
PART 0
PART 2
H37A  2    0.391992    1.153895    0.364614    10.50000   -1.20000
AFIX   0
PART 0
C43   1    0.361911    1.010545    0.322805    11.00000    0.01343    0.02137 =
         0.01540   -0.00331    0.00006   -0.00989
AFIX  13
H43   2    0.329980    0.946327    0.312002    11.00000   -1.20000
AFIX   0
C44   1    0.537513    0.947875    0.314306    11.00000    0.01567    0.02950 =
         0.02047   -0.00105   -0.00247   -0.01029
AFIX  23
H44A  2    0.574611    1.011004    0.323261    11.00000   -1.20000
H44B  2    0.589232    0.852300    0.325258    11.00000   -1.20000
AFIX   0
C45   1    0.579895    0.933861    0.276284    11.00000    0.01540    0.06159 =
         0.02375   -0.00798    0.00415   -0.01287
AFIX  23
H45A  2    0.693033    0.897264    0.271441    11.00000   -1.20000
H45B  2    0.551675    0.863509    0.267721    11.00000   -1.20000
AFIX   0
C46   1    0.497651    1.076659    0.258054    11.00000    0.02914    0.07421 =
         0.02350    0.01186   -0.00344   -0.02890
AFIX  23
H46A  2    0.520536    1.061796    0.233391    11.00000   -1.20000
H46B  2    0.537237    1.142700    0.264157    11.00000   -1.20000
AFIX   0
C47   1    0.322577    1.145020    0.267079    11.00000    0.02676    0.05093 =
         0.01987    0.00923   -0.00766   -0.02330
AFIX  23
H47A  2    0.273898    1.241573    0.256451    11.00000   -1.20000
H47B  2    0.280644    1.085884    0.258059    11.00000   -1.20000
AFIX   0
C48   1    0.282388    1.157693    0.305201    11.00000    0.02185    0.02392 =
         0.01940    0.00372   -0.00631   -0.01263
AFIX  23
H48A  2    0.168980    1.198054    0.310364    11.00000   -1.20000
H48B  2    0.315627    1.224150    0.313941    11.00000   -1.20000
AFIX   0
C49   1   -0.059891    1.005929    0.328947    11.00000    0.01632    0.02416 =
         0.02319   -0.00008   -0.00363   -0.01014
AFIX  13
H49   2   -0.143895    0.978406    0.327048    11.00000   -1.20000
AFIX   0
C50   1   -0.132276    1.146273    0.348052    11.00000    0.03028    0.02980 =
         0.02619   -0.00182    0.00557   -0.00770
AFIX  23
H50A  2   -0.177525    1.131840    0.370593    11.00000   -1.20000
H50B  2   -0.050586    1.173681    0.351396    11.00000   -1.20000
AFIX   0
C51   1   -0.256967    1.267284    0.329700    11.00000    0.03164    0.03402 =
         0.04534    0.00114    0.00161   -0.00384
AFIX  23
H51A  2   -0.294690    1.357224    0.342318    11.00000   -1.20000
H51B  2   -0.345136    1.245824    0.329041    11.00000   -1.20000
AFIX   0
C52   1   -0.198587    1.288845    0.293887    11.00000    0.03044    0.02617 =
         0.03939    0.00720   -0.01007   -0.00610
AFIX  23
H52A  2   -0.120851    1.324070    0.294550    11.00000   -1.20000
H52B  2   -0.285685    1.362457    0.282186    11.00000   -1.20000
AFIX   0
C53   1   -0.126413    1.149960    0.274348    11.00000    0.03022    0.03632 =
         0.03004    0.00634   -0.01219   -0.01766
AFIX  23
H53A  2   -0.081238    1.165258    0.251879    11.00000   -1.20000
H53B  2   -0.207618    1.122051    0.270902    11.00000   -1.20000
AFIX   0
C54   1    0.000010    1.028393    0.293100    11.00000    0.02439    0.02505 =
         0.02240   -0.00131   -0.00719   -0.01296
AFIX  23
H54A  2    0.039619    0.938342    0.280427    11.00000   -1.20000
H54B  2    0.087009    1.051262    0.294069    11.00000   -1.20000
AFIX   0
C55   1    0.045618    0.753915    0.349847    11.00000    0.03023    0.02206 =
         0.01384   -0.00324   -0.00023   -0.01803
AFIX  13
H55   2    0.127807    0.686587    0.364110    11.00000   -1.20000
AFIX   0
C56   1    0.076432    0.679252    0.315997    11.00000    0.03210    0.02463 =
         0.01610   -0.00803    0.00179   -0.01689
AFIX  23
H56A  2   -0.004625    0.740407    0.301188    11.00000   -1.20000
H56B  2    0.177446    0.666168    0.304693    11.00000   -1.20000
AFIX   0
C57   1    0.077370    0.533562    0.321198    11.00000    0.06253    0.02927 =
         0.02198   -0.00626    0.00141   -0.03166
AFIX  23
H57A  2    0.162257    0.470602    0.334947    11.00000   -1.20000
H57B  2    0.096592    0.487929    0.299049    11.00000   -1.20000
AFIX   0
C58   1   -0.076645    0.549017    0.338919    11.00000    0.08475    0.05666 =
         0.03781   -0.02086    0.01699   -0.06160
AFIX  23
H58A  2   -0.071167    0.452818    0.343073    11.00000   -1.20000
H58B  2   -0.160282    0.604008    0.324188    11.00000   -1.20000
AFIX   0
C59   1   -0.113633    0.626396    0.372567    11.00000    0.08418    0.05834 =
         0.03219   -0.01636    0.01824   -0.06344
AFIX  23
H59A  2   -0.217554    0.642745    0.382658    11.00000   -1.20000
H59B  2   -0.037594    0.564938    0.388363    11.00000   -1.20000
AFIX   0
C60   1   -0.109268    0.769414    0.367826    11.00000    0.04161    0.03923 =
         0.01664   -0.00727    0.00559   -0.03157
AFIX  23
H60A  2   -0.126442    0.812936    0.390172    11.00000   -1.20000
H60B  2   -0.194373    0.835029    0.354433    11.00000   -1.20000
AFIX   0
C61   1    0.129162    0.818217    0.444940    11.00000    0.02957    0.03370 =
         0.02018   -0.00583   -0.00100   -0.01425
AFIX  13
H61   2    0.170567    0.826267    0.466055    11.00000   -1.20000
AFIX   0
C62   1   -0.011888    0.961211    0.439380    11.00000    0.03516    0.02790 =
         0.04801   -0.01410    0.00112   -0.01536
AFIX  23
H62A  2    0.019707    1.038682    0.437651    11.00000   -1.20000
H62B  2   -0.050574    0.958547    0.417701    11.00000   -1.20000
AFIX   0
C63   1   -0.142185    0.996198    0.467458    11.00000    0.03801    0.07065 =
         0.03892   -0.03057   -0.00010   -0.00691
AFIX  23
H63A  2   -0.108160    1.010192    0.488749    11.00000   -1.20000
H63B  2   -0.232441    1.086764    0.461823    11.00000   -1.20000
AFIX   0
C64   1   -0.188931    0.877099    0.472322    11.00000    0.03475    0.07955 =
         0.03182    0.01681    0.00981   -0.01210
AFIX  23
H64A  2   -0.232539    0.869199    0.451810    11.00000   -1.20000
H64B  2   -0.269739    0.899612    0.491511    11.00000   -1.20000
AFIX   0
C65   1   -0.049188    0.734702    0.479229    11.00000    0.03071    0.10196 =
         0.05089    0.04542    0.00373   -0.01612
AFIX  23
H65A  2   -0.080589    0.657085    0.481494    11.00000   -1.20000
H65B  2   -0.011249    0.740274    0.500778    11.00000   -1.20000
AFIX   0
C66   1    0.080968    0.699216    0.450761    11.00000    0.02772    0.03751 =
         0.04416    0.02138    0.00165   -0.01402
AFIX  23
H66A  2    0.171369    0.608855    0.456439    11.00000   -1.20000
H66B  2    0.046140    0.684098    0.429700    11.00000   -1.20000
AFIX   0
C67   1    0.412653    0.698366    0.425115    11.00000    0.03096    0.03305 =
         0.02251    0.01035   -0.00625   -0.02110
AFIX  13
H67   2    0.479391    0.717374    0.406629    11.00000   -1.20000
AFIX   0
C68   1    0.454670    0.733666    0.457699    11.00000    0.03934    0.10266 =
         0.01844    0.00818   -0.00449   -0.04224
AFIX  23
H68A  2    0.396930    0.711330    0.477268    11.00000   -1.20000
H68B  2    0.425173    0.837359    0.457998    11.00000   -1.20000
AFIX   0
C69   1    0.629153    0.646029    0.460453    11.00000    0.04344    0.16191 =
         0.02057   -0.00005   -0.00512   -0.05096
AFIX  23
H69A  2    0.685539    0.677331    0.442307    11.00000   -1.20000
H69B  2    0.653418    0.665927    0.482349    11.00000   -1.20000
AFIX   0
C70   1    0.685471    0.485700    0.457777    11.00000    0.03855    0.15640 =
         0.06461    0.07093   -0.01153   -0.03302
AFIX  23
H70A  2    0.799585    0.435581    0.457255    11.00000   -1.20000
H70B  2    0.642568    0.451043    0.477940    11.00000   -1.20000
AFIX   0
C71   1    0.637578    0.449958    0.426457    11.00000    0.03232    0.05094 =
         0.09736    0.04792   -0.00778   -0.01703
AFIX  23
H71A  2    0.666332    0.346328    0.426766    11.00000   -1.20000
H71B  2    0.693817    0.470281    0.406277    11.00000   -1.20000
AFIX   0
C72   1    0.463731    0.536682    0.424076    11.00000    0.03523    0.03627 =
         0.08150    0.02699   -0.00718   -0.02149
AFIX  23
H72A  2    0.407440    0.509430    0.443073    11.00000   -1.20000
H72B  2    0.437192    0.513981    0.402779    11.00000   -1.20000
AFIX   0
PART 1
C38A  1    0.212221    1.173853    0.408011    10.50000    0.03642    0.03599 =
         0.01623   -0.00468    0.00308   -0.02167
AFIX  23
H38A  2    0.211551    1.096645    0.423571    10.50000   -1.20000
H38B  2    0.110412    1.223117    0.398811    10.50000   -1.20000
AFIX   0
C39A  1    0.236130    1.281529    0.427723    10.50000    0.04463    0.03131 =
         0.02066   -0.01220    0.00658   -0.02131
AFIX  23
H39A  2    0.227951    1.363161    0.412708    10.50000   -1.20000
H39B  2    0.154074    1.319386    0.446659    10.50000   -1.20000
AFIX   0
C40A  1    0.394326    1.210933    0.441535    10.50000    0.06302    0.03382 =
         0.01703   -0.00224   -0.00021   -0.03741
AFIX  23
H40A  2    0.409844    1.283719    0.452905    10.50000   -1.20000
H40B  2    0.398590    1.136050    0.458418    10.50000   -1.20000
AFIX   0
C41A  1    0.521307    1.144306    0.413363    10.50000    0.02886    0.03727 =
         0.01915   -0.00231   -0.00414   -0.02201
AFIX  23
H41A  2    0.622470    1.096530    0.422868    10.50000   -1.20000
H41B  2    0.522108    1.220523    0.397472    10.50000   -1.20000
AFIX   0
C42A  1    0.498747    1.034804    0.394326    10.50000    0.03231    0.03007 =
         0.02001   -0.00335   -0.00305   -0.01890
AFIX  23
H42A  2    0.504577    0.955151    0.409804    10.50000   -1.20000
H42B  2    0.582061    0.994421    0.375718    10.50000   -1.20000
AFIX   0
PART 0
PART 2
C38B  1    0.177745    1.228914    0.393921    10.50000    0.02592    0.01849 =
         0.02171   -0.00835   -0.00500   -0.00865
AFIX  23
H38C  2    0.116023    1.281391    0.375037    10.50000   -1.20000
H38D  2    0.120287    1.184939    0.408096    10.50000   -1.20000
AFIX   0
C39B  1    0.198158    1.335016    0.415132    10.50000    0.03925    0.01984 =
         0.02897   -0.00702   -0.01302   -0.01076
AFIX  23
H39C  2    0.245391    1.386943    0.400477    10.50000   -1.20000
H39D  2    0.095842    1.406392    0.425103    10.50000   -1.20000
AFIX   0
C40B  1    0.299482    1.256675    0.442795    10.50000    0.06731    0.02382 =
         0.02087   -0.00089   -0.00832   -0.02399
AFIX  23
H40C  2    0.317279    1.325804    0.455101    10.50000   -1.20000
H40D  2    0.245318    1.215496    0.458984    10.50000   -1.20000
AFIX   0
C41B  1    0.452332    1.138734    0.429726    10.50000    0.04183    0.03463 =
         0.05190   -0.01060   -0.02311   -0.01375
AFIX  23
H41C  2    0.511516    1.086573    0.448970    10.50000   -1.20000
H41D  2    0.512356    1.180722    0.415760    10.50000   -1.20000
AFIX   0
C42B  1    0.431589    1.032191    0.408328    10.50000    0.03740    0.02240 =
         0.03812   -0.00348   -0.02334   -0.00864
AFIX  23
H42C  2    0.534288    0.958032    0.399303    10.50000   -1.20000
H42D  2    0.379903    0.983605    0.422790    10.50000   -1.20000
AFIX   0
HKLF 4

REM  HfCl(N(C6H11)2)3 in P-1
REM R1 =  0.0384 for   17910 Fo > 4sig(Fo)  and  0.0503 for all   21147 data
REM    784 parameters refined using      0 restraints

END

WGHT      0.0107      9.6717

REM Highest difference peak  2.833,  deepest hole -3.685,  1-sigma level  0.121
Q1    1  -0.2759  0.8236  0.3651  11.00000  0.05    2.83
Q2    1   0.6599  0.7459  0.1367  11.00000  0.05    1.74
Q3    1   0.4032  0.2765  0.1336  11.00000  0.05    1.45
Q4    1  -0.0603  0.5141  0.3643  11.00000  0.05    1.38
Q5    1   0.5373  1.2386  0.3701  11.00000  0.05    1.32
Q6    1   0.2930  0.7598  0.3664  11.00000  0.05    1.28
Q7    1   0.3795  0.2979  0.1258  11.00000  0.05    1.21
Q8    1   1.0615  0.0236  0.1283  11.00000  0.05    1.09
Q9    1   0.1825  0.9338  0.3834  11.00000  0.05    1.06
Q10   1   0.1364  0.8991  0.1262  11.00000  0.05    0.85
Q11   1   0.3802  0.3940  0.1186  11.00000  0.05    0.73
Q12   1   0.0194  1.3838  0.3675  11.00000  0.05    0.72
Q13   1  -0.0080  0.3935  0.3552  11.00000  0.05    0.70
Q14   1  -0.2515  1.0419  0.3399  11.00000  0.05    0.69
Q15   1   0.6450  0.5557  0.1707  11.00000  0.05    0.67
Q16   1  -0.0551  0.5817  0.3809  11.00000  0.05    0.61
Q17   1   0.3393  1.0794  0.3086  11.00000  0.05    0.59
Q18   1  -0.1080  0.5805  0.3399  11.00000  0.05    0.56
Q19   1   0.3509  0.7885  0.3617  11.00000  0.05    0.56
Q20   1   0.3610 -0.0029  0.0659  11.00000  0.05    0.56
Q21   1   0.1234  0.6924  0.0893  11.00000  0.05    0.55
Q22   1   0.2099  0.7398  0.0943  11.00000  0.05    0.54
Q23   1   0.9629  0.1050  0.1499  11.00000  0.05    0.53
Q24   1   0.3037  0.4466  0.1201  11.00000  0.05    0.52
Q25   1   0.3858  0.1412  0.1503  11.00000  0.05    0.52
Q26   1   0.3174  0.8562  0.3733  11.00000  0.05    0.52
Q27   1   0.4610  0.1032  0.0929  11.00000  0.05    0.52
Q28   1   0.5159  0.1766  0.1052  11.00000  0.05    0.52
Q29   1   0.1802  1.0104  0.4012  11.00000  0.05    0.52
Q30   1   0.2681  0.9132  0.3492  11.00000  0.05    0.51
Q31   1   1.0448 -0.0528  0.1454  11.00000  0.05    0.51
Q32   1   0.0203  0.5786  0.3296  11.00000  0.05    0.51
Q33   1   0.2065  0.9643  0.3638  11.00000  0.05    0.51
Q34   1   0.2537  0.7910  0.3935  11.00000  0.05    0.51
Q35   1   0.2807  0.3034  0.0386  11.00000  0.05    0.51
Q36   1   0.6330  0.2796  0.0505  11.00000  0.05    0.51
Q37   1   0.3581  0.6553  0.3303  11.00000  0.05    0.51
Q38   1   0.0775  0.5978  0.1854  11.00000  0.05    0.50
Q39   1   0.4211  0.1212  0.1521  11.00000  0.05    0.50
Q40   1   0.0559  0.5841  0.1026  11.00000  0.05    0.50
Q41   1   0.4643  0.0838  0.0673  11.00000  0.05    0.49
Q42   1  -0.1061  0.7320  0.0599  11.00000  0.05    0.49
Q43   1  -0.1597  0.9407  0.4653  11.00000  0.05    0.49
Q44   1   0.4020  0.3783  0.1014  11.00000  0.05    0.48
Q45   1  -0.1611  0.6160  0.3916  11.00000  0.05    0.48
Q46   1  -0.0552  0.4216  0.3587  11.00000  0.05    0.48
Q47   1   0.4455  0.2239  0.0858  11.00000  0.05    0.48
Q48   1   0.1028  0.7655  0.1640  11.00000  0.05    0.47
Q49   1   0.4151  0.7126  0.2116  11.00000  0.05    0.46
Q50   1   0.2959  0.0393  0.0331  11.00000  0.05    0.46
Q51   1   0.8056  0.1289  0.1830  11.00000  0.05    0.45
Q52   1   0.0459  0.8844  0.4427  11.00000  0.05    0.45
Q53   1   0.4745  0.2837  0.1034  11.00000  0.05    0.45
Q54   1   0.0652  0.6829  0.1073  11.00000  0.05    0.45
Q55   1   1.0146  0.1061  0.1172  11.00000  0.05    0.45
Q56   1   0.2533  0.4101  0.1354  11.00000  0.05    0.45
Q57   1   0.4831  0.5737  0.1605  11.00000  0.05    0.45
Q58   1   0.5236  1.0428  0.3782  11.00000  0.05    0.45
Q59   1  -0.1514  1.2204  0.2874  11.00000  0.05    0.44
Q60   1   0.2656  0.0233  0.0361  11.00000  0.05    0.44
Q61   1   0.4687  0.4074  0.1439  11.00000  0.05    0.44
Q62   1   0.3731  0.9208  0.1786  11.00000  0.05    0.44
Q63   1   0.4989  0.1203  0.1376  11.00000  0.05    0.44
Q64   1   0.3199  0.4626  0.1438  11.00000  0.05    0.44
Q65   1   0.4417  0.7334  0.1680  11.00000  0.05    0.44
Q66   1   0.3817  0.6192  0.3371  11.00000  0.05    0.43
Q67   1   0.1790  0.8035  0.3593  11.00000  0.05    0.43
Q68   1   0.3807  0.7045  0.3523  11.00000  0.05    0.42
Q69   1   0.3360  0.7452  0.4207  11.00000  0.05    0.42
Q70   1   0.6178  0.5076  0.3795  11.00000  0.05    0.42
Q71   1  -0.0442  0.5578  0.1026  11.00000  0.05    0.42
Q72   1   0.0687  0.7732  0.4453  11.00000  0.05    0.41
Q73   1   0.4402  0.3814  0.1567  11.00000  0.05    0.41
Q74   1   0.3173  0.5971  0.3876  11.00000  0.05    0.41
Q75   1   0.9597  0.0939  0.1276  11.00000  0.05    0.41
Q76   1   0.3824  0.8187  0.3032  11.00000  0.05    0.41
Q77   1   0.3855  0.7573  0.3224  11.00000  0.05    0.41
Q78   1  -0.0740  1.0953  0.2855  11.00000  0.05    0.41
Q79   1  -0.1205  0.6148  0.3625  11.00000  0.05    0.40
Q80   1   0.0108  0.7985  0.0661  11.00000  0.05    0.40
Q81   1   0.2957  1.1621  0.2862  11.00000  0.05    0.40
Q82   1   0.6928  0.3425  0.4442  11.00000  0.05    0.40
Q83   1   0.6187  0.7067  0.4599  11.00000  0.05    0.40
Q84   1   0.4622  0.4792  0.4599  11.00000  0.05    0.40
Q85   1   0.9688  0.1658  0.1745  11.00000  0.05    0.40
Q86   1   0.0299  0.6652  0.2096  11.00000  0.05    0.40
Q87   1   0.2753  0.5838  0.4062  11.00000  0.05    0.40
Q88   1   0.3931  0.9200  0.3183  11.00000  0.05    0.40
Q89   1   0.5261  0.4650  0.1632  11.00000  0.05    0.40
Q90   1   0.4501  0.5378  0.4390  11.00000  0.05    0.40
Q91   1   1.1360  0.0006  0.1215  11.00000  0.05    0.40
Q92   1   0.4626  0.2018  0.1569  11.00000  0.05    0.40
Q93   1   0.0367  0.4962  0.1810  11.00000  0.05    0.40
Q94   1   0.1237  0.9013  0.3620  11.00000  0.05    0.40
Q95   1  -0.2341  0.6246  0.3341  11.00000  0.05    0.40
Q96   1  -0.1370  0.6770  0.3761  11.00000  0.05    0.39
Q97   1   0.0001  0.9564  0.3386  11.00000  0.05    0.39
Q98   1   0.7255  0.4427  0.4556  11.00000  0.05    0.39
Q99   1   0.2937  0.3175  0.1783  11.00000  0.05    0.39
Q100  1   0.2859  0.0220  0.0923  11.00000  0.05    0.39
;
_shelx_res_checksum   57360

_shelx_hkl_file
;
  -1   0   0   39.16    1.03
   1   0   0   40.86    1.02
   1   0   0   39.74    0.99
   1   0   0   39.44    0.93
   1   0   0   39.72    0.94
   1   0   0   39.72    0.94
   2   0   0   15.21    0.46
   2   0   0   15.64    0.60
   2   0   0   14.97    0.48
   2   0   0   15.39    0.48
   2   0   0   15.69    0.56
   2   0   0   14.74    0.49
  -3   0   0   28.20    1.03
   3   0   0   27.60    0.83
   3   0   0   28.54    0.79
   3   0   0   26.86    0.99
   3   0   0   27.97    0.81
   3   0   0   28.08    0.92
   3   0   0   28.42    0.82
  -4   0   0    0.06    0.28
   4   0   0   -0.05    0.19
   4   0   0    0.00    0.17
   4   0   0    0.25    0.32
   4   0   0    0.30    0.26
   4   0   0   -0.08    0.17
   4   0   0   -0.25    0.18
  -5   0   0    5.55    0.62
   5   0   0    5.96    0.54
   5   0   0    5.84    0.44
   5   0   0    5.86    0.45
   5   0   0    5.52    0.40
   5   0   0    5.46    0.43
   5   0   0    6.08    0.64
  -6   0   0   22.94    1.23
   6   0   0   21.53    0.86
   6   0   0   25.00    1.06
   6   0   0   21.95    0.87
   6   0   0   25.34    1.19
   6   0   0   23.71    0.89
   6   0   0   22.33    0.85
  -7   0   0    1.54    0.58
   7   0   0    1.79    0.37
   7   0   0    1.15    0.53
   7   0   0    1.49    0.44
   7   0   0    1.82    0.35
  -8   0   0   43.55    2.00
   8   0   0   41.92    1.46
   8   0   0   40.22    1.65
   8   0   0   44.10    1.91
  -9   0   0   17.16    1.57
   9   0   0   17.20    1.35
   9   0   0   19.89    1.53
   9   0   0   17.57    0.96
 -10   0   0    6.39    1.09
  10   0   0    3.88    0.58
  10   0   0    4.13    0.93
  10   0   0    5.02    1.02
 -11   0   0   10.64    1.52
  11   0   0   10.38    0.89
  11   0   0   11.71    1.43
  11   0   0    8.23    1.37
 -12   0   0    3.18    1.17
  12   0   0    2.84    0.63
  12   0   0    4.83    1.29
  12   0   0    3.08    1.00
  11  -1   0    6.88    1.23
  11  -1   0    9.32    1.47
  11  -1   0    6.00    0.67
 -11   1   0    6.56    1.25
  10  -1   0    5.46    1.03
  10  -1   0    6.01    0.64
  10  -1   0    4.67    1.12
 -10   1   0    7.51    1.16
   9  -1   0    0.08    0.65
   9  -1   0    1.81    0.79
   9  -1   0    0.28    0.33
  -9   1   0    0.29    0.74
   8  -1   0    1.06    0.61
   8  -1   0    1.11    0.34
   8  -1   0    0.62    0.45
  -8   1   0    0.91    0.68
   7  -1   0    0.17    0.48
   7  -1   0    0.20    0.39
   7  -1   0    0.48    0.27
   7  -1   0    1.02    0.31
  -7   1   0    1.50    0.64
   6  -1   0   28.67    1.12
   6  -1   0   29.85    1.27
   6  -1   0   29.40    0.97
   6  -1   0   27.37    1.34
   6  -1   0   30.25    0.97
  -6   1   0   28.55    1.44
   5  -1   0  145.18    3.66
   5  -1   0  145.17    3.45
   5  -1   0  142.96    3.89
   5  -1   0  146.06    3.46
   5  -1   0  141.32    3.79
   5  -1   0  143.18    3.42
  -5   1   0  143.19    3.98
   4  -1   0   37.81    0.98
   4  -1   0   38.76    1.04
   4  -1   0   35.49    1.34
   4  -1   0   37.35    1.03
   4  -1   0   38.99    1.23
   4  -1   0   39.19    1.33
  -4   1   0   38.82    1.45
   3  -1   0   81.81    2.12
   3  -1   0   79.32    1.90
   3  -1   0   80.49    1.90
   3  -1   0   77.36    2.16
   3  -1   0   80.83    2.23
  -3   1   0   81.73    2.28
   2  -1   0  191.50    4.56
  -2   1   0  190.94    4.61
  -1   1   0    3.36    0.30
   0  -1   0   -0.02    0.07
   0  -1   0   -0.05    0.11
   0  -1   0    0.05    0.08
   0  -1   0   -0.04    0.12
   0  -1   0   -0.06    0.10
   0  -1   0    0.03    0.08
   0   1   0   -0.08    0.12
   0   1   0    0.06    0.07
   0   1   0   -0.02    0.11
  -1  -1   0   41.63    1.07
  -1  -1   0   40.66    1.04
  -1  -1   0   39.89    1.05
  -1  -1   0   41.56    1.03
  -1  -1   0   40.50    1.05
   1   1   0   41.31    1.04
   1   1   0   41.29    1.03
   1   1   0   41.61    1.06
  -2  -1   0   -0.01    0.19
  -2  -1   0   -0.03    0.20
  -2  -1   0    0.16    0.17
  -2  -1   0    0.06    0.24
  -2  -1   0   -0.06    0.17
   2   1   0   -0.04    0.17
   2   1   0    0.11    0.17
   2   1   0    0.21    0.21
   2   1   0    0.36    0.18
   2   1   0   -0.09    0.17
  -3  -1   0   47.18    1.27
  -3  -1   0   46.51    1.41
  -3  -1   0   49.09    1.45
  -3  -1   0   48.05    1.26
   3   1   0   46.75    1.30
   3   1   0   46.79    1.42
   3   1   0   46.06    1.30
   3   1   0   44.83    1.29
   3   1   0   48.52    1.31
  -4  -1   0   51.19    1.63
  -4  -1   0   51.13    1.42
  -4  -1   0   49.00    1.57
  -4  -1   0   51.82    1.34
   4   1   0   48.59    1.42
   4   1   0   49.49    1.59
   4   1   0   51.74    1.45
   4   1   0   51.52    1.47
   4   1   0   50.20    1.25
   4   1   0   49.02    1.41
  -5  -1   0   55.94    1.79
  -5  -1   0   53.91    1.39
  -5  -1   0   54.25    1.83
   5   1   0   53.14    1.61
   5   1   0   52.53    1.55
   5   1   0   53.08    1.37
   5   1   0   53.31    1.57
   5   1   0   52.06    1.56
   5   1   0   56.38    1.80
  -6  -1   0   65.60    2.26
   6   1   0   67.84    1.95
   6   1   0   68.21    1.94
   6   1   0   66.25    1.92
   6   1   0   66.30    1.72
   6   1   0   67.77    2.01
   6   1   0   71.07    2.24
  -7  -1   0   14.71    1.04
   7   1   0   15.02    0.80
   7   1   0   15.04    1.05
   7   1   0   16.61    0.82
   7   1   0   15.71    0.83
   7   1   0   14.82    0.87
  -8  -1   0    1.32    0.61
   8   1   0    0.42    0.37
   8   1   0    0.59    0.35
   8   1   0    0.41    0.53
  -9  -1   0    3.66    0.89
   9   1   0    3.54    0.82
   9   1   0    3.25    0.53
 -10  -1   0    0.03    0.61
  10   1   0    0.92    0.72
  10   1   0    0.28    0.69
  10   1   0    0.86    0.45
 -11  -1   0   25.15    2.07
  11   1   0   24.79    1.30
  11   1   0   23.90    1.73
  11   1   0   23.36    1.86
 -12  -1   0   21.20    2.04
  12   1   0   17.33    1.75
  12   1   0   17.87    1.22
  12   1   0   17.66    1.92
  11  -2   0    1.88    1.02
  11  -2   0    0.41    0.34
 -11   2   0    2.59    1.07
  10  -2   0    9.10    0.66
  10  -2   0    8.43    1.24
  10  -2   0    8.95    1.33
 -10   2   0   11.60    1.47
   9  -2   0    2.93    0.84
   9  -2   0    4.17    0.46
   9  -2   0    4.48    1.03
  -9   2   0    4.57    1.03
   8  -2   0   16.11    1.46
   8  -2   0   19.66    1.26
   8  -2   0   16.55    1.40
   8  -2   0   17.58    0.78
  -8   2   0   19.08    1.60
   7  -2   0   76.42    2.01
   7  -2   0   78.92    2.53
   7  -2   0   75.97    2.58
   7  -2   0   77.01    2.02
   7  -2   0   79.45    2.69
   7  -2   0   70.20    2.63
  -7   2   0   77.39    2.81
   6  -2   0    0.82    0.39
   6  -2   0    0.73    0.45
   6  -2   0    0.64    0.20
   6  -2   0    0.67    0.21
   6  -2   0    0.74    0.37
  -6   2   0    1.51    0.58
   5  -2   0    0.91    0.18
   5  -2   0    1.20    0.36
   5  -2   0    0.98    0.43
   5  -2   0    0.48    0.17
   5  -2   0    0.88    0.36
  -5   2   0    0.54    0.46
   4  -2   0    7.96    0.69
   4  -2   0    7.33    0.61
   4  -2   0    7.35    0.68
  -4   2   0    8.07    0.77
   3  -2   0    1.30    0.35
  -3   2   0    1.61    0.41
  -2   2   0   91.51    2.47
   1  -2   0   42.15    1.22
   1  -2   0   42.49    1.03
   1  -2   0   41.42    1.03
   1  -2   0   42.66    1.25
   1  -2   0   42.45    1.28
  -1   2   0   44.14    1.27
   0  -2   0   42.47    1.06
   0  -2   0   40.05    1.06
   0  -2   0   41.04    1.06
   0  -2   0   40.13    1.17
   0  -2   0   37.60    1.18
   0  -2   0   42.54    1.15
   0   2   0   40.64    1.03
   0   2   0   43.27    1.24
  -1  -2   0   68.75    1.75
  -1  -2   0   70.77    1.76
  -1  -2   0   66.04    1.70
  -1  -2   0   67.63    1.71
  -1  -2   0   67.85    1.68
   1   2   0   66.07    1.70
   1   2   0   69.11    1.75
   1   2   0   64.77    1.72
   1   2   0   66.58    1.70
  -2  -2   0   35.24    1.03
  -2  -2   0   35.89    1.06
  -2  -2   0   35.50    1.10
  -2  -2   0   36.56    1.08
  -2  -2   0   37.60    1.07
   2   2   0   34.88    1.05
   2   2   0   34.67    1.02
   2   2   0   34.78    1.08
   2   2   0   35.14    1.06
  -3  -2   0   24.52    0.83
  -3  -2   0   23.46    0.84
  -3  -2   0   23.23    0.91
  -3  -2   0   23.39    0.91
  -3  -2   0   23.58    0.80
  -3  -2   0   23.65    0.89
   3   2   0   23.18    0.80
   3   2   0   24.20    0.86
   3   2   0   23.54    0.91
   3   2   0   22.02    0.84
  -4  -2   0    3.80    0.49
  -4  -2   0    3.39    0.37
  -4  -2   0    4.24    0.50
  -4  -2   0    4.17    0.38
   4   2   0    3.58    0.40
   4   2   0    3.07    0.38
   4   2   0    3.39    0.41
   4   2   0    4.41    0.55
   4   2   0    2.81    0.36
  -5  -2   0    2.58    0.35
  -5  -2   0    3.62    0.54
  -5  -2   0    2.81    0.47
  -5  -2   0    2.67    0.36
   5   2   0    2.71    0.38
   5   2   0    2.35    0.38
   5   2   0    2.48    0.38
   5   2   0    3.09    0.40
   5   2   0    3.14    0.54
  -6  -2   0   59.24    1.63
  -6  -2   0   57.18    1.68
  -6  -2   0   57.49    1.95
  -6  -2   0   56.51    1.97
   6   2   0   57.42    1.76
   6   2   0   59.77    1.80
   6   2   0   58.02    1.75
   6   2   0   54.98    1.75
   6   2   0   57.51    1.98
  -7  -2   0   99.81    2.57
  -7  -2   0  100.84    3.16
  -7  -2   0  104.11    3.11
   7   2   0  103.38    2.86
   7   2   0  100.82    3.11
   7   2   0  100.49    2.83
   7   2   0  103.51    2.84
  -8  -2   0    2.65    0.60
   8   2   0    3.60    0.52
   8   2   0    3.80    0.55
   8   2   0    4.09    0.71
   8   2   0    3.76    0.55
  -9  -2   0   38.53    1.94
   9   2   0   39.87    1.89
   9   2   0   38.35    1.56
 -10  -2   0    9.03    1.28
  10   2   0    9.16    0.87
  10   2   0    8.59    1.18
  10   2   0    9.94    1.20
 -11  -2   0    1.37    0.81
  11   2   0    1.09    0.52
  11   2   0    2.07    0.85
  11   2   0    0.72    0.79
 -12  -2   0   -1.34    0.68
  12   2   0   -0.06    0.79
  12   2   0    1.04    0.88
  12   2   0    0.84    0.53
  10  -3   0    3.60    1.11
  10  -3   0    4.15    1.11
  10  -3   0    3.17    1.11
 -10   3   0    1.81    0.94
   9  -3   0    1.54    0.76
   9  -3   0    2.23    0.90
  -9   3   0    0.55    0.79
   8  -3   0    1.69    0.77
   8  -3   0    1.12    0.65
  -8   3   0    1.17    0.72
   7  -3   0   13.83    1.26
   7  -3   0   15.97    1.11
   7  -3   0   17.05    1.35
   7  -3   0   14.68    1.24
   7  -3   0   14.76    1.05
  -7   3   0   11.95    1.25
   6  -3   0   21.39    1.20
   6  -3   0   21.03    1.16
   6  -3   0   19.49    1.21
   6  -3   0   21.85    1.31
  -6   3   0   22.12    1.38
   5  -3   0    4.77    0.67
   5  -3   0    5.24    0.66
   5  -3   0    5.11    0.67
   5  -3   0    4.14    0.59
  -5   3   0    3.98    0.69
   4  -3   0   67.97    2.19
   4  -3   0   68.38    2.22
   4  -3   0   71.02    2.18
   4  -3   0   72.19    2.28
  -4   3   0   67.67    2.27
   3  -3   0    4.13    0.51
   3  -3   0    3.27    0.50
  -3   3   0    4.40    0.54
   2  -3   0   49.09    1.60
   2  -3   0   46.82    1.16
   2  -3   0   46.09    1.15
   2  -3   0   48.35    1.51
   2  -3   0   46.98    1.53
  -2   3   0   47.87    1.55
   1  -3   0    8.97    0.58
   1  -3   0    7.86    0.53
   1  -3   0    8.64    0.38
   1  -3   0    8.37    0.37
   1  -3   0    8.55    0.62
   1  -3   0    8.59    0.34
  -1   3   0    8.87    0.58
   0  -3   0    0.90    0.22
   0  -3   0    1.76    0.35
   0  -3   0    0.62    0.32
   0  -3   0    0.71    0.21
   0  -3   0    0.79    0.17
   0  -3   0    0.81    0.22
   0  -3   0    1.02    0.28
   0   3   0    1.08    0.18
   0   3   0    0.77    0.36
  -1  -3   0   46.08    1.37
  -1  -3   0   43.09    1.26
  -1  -3   0   43.50    1.24
  -1  -3   0   45.06    1.24
  -1  -3   0   43.62    1.26
  -1  -3   0   44.11    1.33
   1   3   0   43.66    1.23
   1   3   0   41.59    1.32
   1   3   0   43.76    1.32
  -2  -3   0  197.46    4.66
  -2  -3   0  198.60    4.67
  -2  -3   0  189.18    4.71
  -2  -3   0  192.77    4.68
  -2  -3   0  195.58    4.64
   2   3   0  196.27    4.66
   2   3   0  197.94    4.66
   2   3   0  189.14    4.70
   2   3   0  194.12    4.67
  -3  -3   0    0.28    0.28
  -3  -3   0    0.12    0.27
  -3  -3   0    0.59    0.30
  -3  -3   0    0.26    0.33
  -3  -3   0    0.55    0.27
   3   3   0   -0.29    0.26
   3   3   0    0.35    0.25
   3   3   0    0.03    0.27
   3   3   0    0.05    0.27
  -4  -3   0   79.81    2.19
  -4  -3   0   77.62    2.26
  -4  -3   0   79.32    2.27
  -4  -3   0   77.34    2.11
  -4  -3   0   80.86    2.17
  -4  -3   0   79.84    2.25
   4   3   0   79.22    2.28
   4   3   0   76.83    2.12
   4   3   0   77.38    2.19
   4   3   0   80.86    2.19
  -5  -3   0   80.41    2.41
  -5  -3   0   78.55    2.16
  -5  -3   0   80.79    2.22
  -5  -3   0   80.01    2.38
  -5  -3   0   79.80    2.38
   5   3   0   82.27    2.29
   5   3   0   77.22    2.26
   5   3   0   79.88    2.19
   5   3   0   79.36    2.39
  -6  -3   0    2.19    0.46
  -6  -3   0    3.23    0.43
  -6  -3   0    1.79    0.47
  -6  -3   0    3.22    0.41
   6   3   0    2.64    0.43
   6   3   0    2.55    0.55
   6   3   0    3.10    0.44
   6   3   0    2.85    0.43
   6   3   0    2.11    0.42
  -7  -3   0    4.65    0.48
  -7  -3   0    4.92    0.70
  -7  -3   0    3.07    0.61
  -7  -3   0    5.22    0.52
   7   3   0    6.24    0.76
   7   3   0    4.54    0.55
   7   3   0    4.79    0.54
   7   3   0    4.53    0.57
  -8  -3   0    1.00    0.55
  -8  -3   0    1.70    0.56
   8   3   0    1.10    0.42
   8   3   0    2.21    0.62
   8   3   0    1.62    0.47
   8   3   0    1.04    0.43
  -9  -3   0    0.00    0.57
   9   3   0    0.36    0.42
   9   3   0   -0.16    0.38
   9   3   0    0.68    0.59
 -10  -3   0   20.22    1.56
  10   3   0   18.40    1.62
  10   3   0   23.42    1.57
  10   3   0   20.16    1.23
 -11  -3   0    1.51    0.77
  11   3   0    2.94    0.94
  11   3   0    3.10    0.94
  11   3   0    3.08    0.69
 -12  -3   0   11.96    1.53
  12   3   0   11.77    1.55
  12   3   0   11.56    1.16
  12   3   0   11.47    1.48
 -13  -3   0   13.46    1.69
  13   3   0   15.11    1.30
  13   3   0   11.32    1.56
  13   3   0    9.84    1.53
  10  -4   0    0.44    0.90
 -10   4   0    0.87    0.95
   9  -4   0   21.77    1.92
   9  -4   0   23.97    1.84
   9  -4   0   24.84    1.71
  -9   4   0   21.82    1.97
   8  -4   0    9.07    1.23
   8  -4   0   10.64    1.23
   8  -4   0   11.14    1.30
  -8   4   0    8.05    1.21
   7  -4   0    7.50    1.07
   7  -4   0    5.83    1.10
   7  -4   0    5.56    0.92
   7  -4   0    5.55    0.82
   7  -4   0    4.88    0.84
   7  -4   0    6.60    0.93
   7  -4   0    5.02    0.93
  -7   4   0    5.37    1.01
   6  -4   0   13.76    1.13
   6  -4   0   14.57    1.24
   6  -4   0   15.33    1.14
   6  -4   0   14.93    1.12
   6  -4   0   13.80    1.26
   6  -4   0   14.38    1.26
   6  -4   0   15.70    1.13
  -6   4   0   14.43    1.29
   5  -4   0    0.90    0.48
   5  -4   0    1.44    0.54
   5  -4   0    1.54    0.53
   5  -4   0    0.39    0.45
   5  -4   0   -0.04    0.44
   5  -4   0    0.90    0.49
   5  -4   0    1.31    0.47
  -5   4   0    1.96    0.60
   4  -4   0    1.17    0.44
   4  -4   0    0.66    0.45
   4  -4   0    1.43    0.45
   4  -4   0    1.85    0.50
   4  -4   0    1.06    0.46
  -4   4   0    0.92    0.51
   3  -4   0   16.49    0.96
   3  -4   0   18.59    1.02
   3  -4   0   17.88    0.95
   3  -4   0   17.75    0.94
  -3   4   0   17.11    1.00
   2  -4   0    1.09    0.20
   2  -4   0    1.28    0.17
   2  -4   0    1.48    0.20
   2  -4   0    1.52    0.39
   2  -4   0    1.79    0.39
   2  -4   0    1.71    0.45
  -2   4   0    1.23    0.39
   1  -4   0  103.24    2.57
   1  -4   0   98.71    2.45
   1  -4   0  102.95    2.76
   1  -4   0  100.72    2.48
   1  -4   0  101.81    2.87
   1  -4   0   99.08    2.77
   1  -4   0  101.45    2.49
  -1   4   0   99.81    2.77
   0  -4   0   53.70    1.76
   0  -4   0   57.71    1.72
   0  -4   0   56.27    1.62
   0  -4   0   53.40    1.39
   0  -4   0   56.15    1.53
   0  -4   0   54.44    1.50
   0  -4   0   54.08    1.52
   0   4   0   55.28    1.40
   0   4   0   56.51    1.78
  -1  -4   0    1.50    0.30
  -1  -4   0    1.43    0.35
  -1  -4   0    1.40    0.30
  -1  -4   0    1.43    0.38
  -1  -4   0    1.69    0.31
  -1  -4   0    1.38    0.30
   1   4   0    1.32    0.27
   1   4   0    2.49    0.44
  -2  -4   0   58.22    1.79
  -2  -4   0   60.44    1.79
  -2  -4   0   58.08    1.69
  -2  -4   0   60.72    1.72
  -2  -4   0   59.71    1.66
   2   4   0   58.74    1.69
   2   4   0   58.62    1.70
   2   4   0   58.07    1.74
   2   4   0   58.45    1.42
   2   4   0   59.47    1.78
  -3  -4   0    0.99    0.31
  -3  -4   0    0.79    0.34
  -3  -4   0    0.89    0.36
  -3  -4   0    0.00    0.31
  -3  -4   0    0.90    0.33
   3   4   0    0.89    0.30
   3   4   0    0.50    0.30
   3   4   0    0.49    0.32
   3   4   0    0.70    0.33
  -4  -4   0    0.58    0.40
  -4  -4   0    0.18    0.33
  -4  -4   0    0.74    0.33
  -4  -4   0    0.83    0.34
  -4  -4   0    0.52    0.32
  -4  -4   0    0.54    0.33
   4   4   0    0.67    0.38
   4   4   0    0.69    0.33
   4   4   0    0.68    0.31
   4   4   0    0.22    0.32
  -5  -4   0   51.49    1.67
  -5  -4   0   51.13    1.61
  -5  -4   0   51.82    1.77
  -5  -4   0   48.91    1.71
  -5  -4   0   50.96    1.68
  -5  -4   0   53.16    1.79
  -5  -4   0   53.19    1.33
   5   4   0   50.57    1.69
   5   4   0   54.60    1.72
   5   4   0   52.67    1.62
   5   4   0   49.37    1.75
  -6  -4   0   18.97    0.88
  -6  -4   0   20.39    0.97
  -6  -4   0   20.12    1.09
  -6  -4   0   19.67    0.95
  -6  -4   0   18.82    1.05
  -6  -4   0   19.10    1.11
   6   4   0   18.56    0.98
   6   4   0   19.56    0.98
   6   4   0   19.66    1.09
   6   4   0   19.77    0.92
  -7  -4   0   34.39    1.52
  -7  -4   0   31.90    1.48
  -7  -4   0   32.51    1.22
  -7  -4   0   33.91    1.29
   7   4   0   31.22    1.48
   7   4   0   32.76    1.39
   7   4   0   32.08    1.37
   7   4   0   34.30    1.29
  -8  -4   0   84.54    2.41
  -8  -4   0   84.60    2.46
  -8  -4   0   82.18    2.79
  -8  -4   0   80.55    2.81
   8   4   0   83.66    2.64
   8   4   0   83.62    2.50
   8   4   0   84.15    2.84
   8   4   0   83.15    2.62
  -9  -4   0    0.46    0.56
  -9  -4   0   -0.23    0.29
  -9  -4   0   -0.30    0.55
   9   4   0   -0.50    0.55
   9   4   0    0.41    0.45
   9   4   0   -0.33    0.39
   9   4   0    0.45    0.42
 -10  -4   0   12.70    1.33
 -10  -4   0   15.74    1.44
  10   4   0   15.02    1.43
  10   4   0   14.60    1.22
  10   4   0   14.10    1.17
  10   4   0   14.77    1.38
 -11  -4   0    4.46    1.01
  11   4   0    3.15    0.68
  11   4   0    3.75    0.96
  11   4   0    1.69    0.82
 -12  -4   0    1.93    0.94
  12   4   0    1.52    0.62
  12   4   0    0.59    0.79
  12   4   0    0.33    0.88
 -13  -4   0    4.04    1.08
  13   4   0    1.32    0.98
  13   4   0    4.68    0.87
  13   4   0    4.82    1.15
   9  -5   0   -0.22    0.78
  -9   5   0   -0.78    0.74
   8  -5   0    0.95    0.72
   8  -5   0    0.26    0.72
  -8   5   0   -1.36    0.67
   7  -5   0    1.85    0.72
   7  -5   0    1.20    0.70
   7  -5   0    2.03    0.75
   7  -5   0    2.02    0.75
   7  -5   0    2.05    0.68
  -7   5   0    1.60    0.83
   6  -5   0   37.64    1.76
   6  -5   0   36.54    1.83
   6  -5   0   36.07    1.75
   6  -5   0   33.91    1.80
   6  -5   0   35.66    1.76
   6  -5   0   39.02    1.87
   6  -5   0   36.94    1.78
  -6   5   0   34.56    1.90
   5  -5   0   39.39    1.78
   5  -5   0   36.21    1.77
   5  -5   0   41.87    1.78
   5  -5   0   45.30    1.86
   5  -5   0   42.02    1.90
   5  -5   0   41.55    1.89
   5  -5   0   42.43    1.87
  -5   5   0   40.41    1.90
   4  -5   0    2.12    0.52
   4  -5   0    3.16    0.63
   4  -5   0    3.34    0.68
   4  -5   0    2.92    0.59
   4  -5   0    2.59    0.57
  -4   5   0    2.21    0.62
   3  -5   0   38.41    1.08
   3  -5   0   40.54    1.71
   3  -5   0   38.25    1.09
   3  -5   0   40.71    1.68
   3  -5   0   39.68    1.60
   3  -5   0   38.85    1.58
   3  -5   0   41.97    1.50
  -3   5   0   37.75    1.63
   2  -5   0   12.33    0.55
   2  -5   0   12.28    0.93
   2  -5   0   13.59    0.84
   2  -5   0   12.13    0.56
   2  -5   0   13.63    0.87
   2  -5   0   12.46    0.53
   2  -5   0   12.63    0.72
  -2   5   0   14.69    0.91
   1  -5   0    1.33    0.45
   1  -5   0    1.49    0.30
   1  -5   0    2.32    0.47
   1  -5   0    1.66    0.30
   1  -5   0    1.73    0.31
   1  -5   0    1.42    0.28
   1  -5   0    2.53    0.46
   0  -5   0    0.42    0.39
   0  -5   0    1.34    0.21
   0  -5   0    1.36    0.30
   0  -5   0    1.10    0.29
   0  -5   0    1.66    0.38
   0  -5   0    1.63    0.42
   0  -5   0    1.15    0.31
   0   5   0    1.33    0.19
  -1  -5   0    0.25    0.28
  -1  -5   0    0.62    0.31
  -1  -5   0    0.93    0.30
  -1  -5   0    0.72    0.40
  -1  -5   0    0.86    0.30
  -1  -5   0    0.98    0.43
   1   5   0    0.69    0.40
   1   5   0    0.38    0.25
  -2  -5   0   84.31    2.35
  -2  -5   0   79.77    2.33
  -2  -5   0   82.40    2.45
  -2  -5   0   84.86    2.49
  -2  -5   0   87.26    2.30
   2   5   0   84.84    2.44
   2   5   0   88.43    2.33
   2   5   0   84.17    2.46
  -3  -5   0  122.91    3.28
  -3  -5   0  122.73    3.33
  -3  -5   0  124.16    3.21
  -3  -5   0  126.24    3.38
  -3  -5   0  123.14    3.25
   3   5   0  123.90    3.29
   3   5   0  118.81    2.94
   3   5   0  125.05    3.26
   3   5   0  121.72    3.33
   3   5   0  123.43    3.24
  -4  -5   0    2.69    0.51
  -4  -5   0    3.12    0.48
  -4  -5   0    1.79    0.44
  -4  -5   0    2.18    0.46
  -4  -5   0    2.03    0.44
   4   5   0    1.52    0.41
   4   5   0    1.87    0.41
   4   5   0    1.33    0.47
   4   5   0    1.97    0.44
  -5  -5   0  122.17    3.41
  -5  -5   0  128.36    3.44
  -5  -5   0  128.06    3.48
  -5  -5   0  127.05    3.56
  -5  -5   0  126.62    3.37
  -5  -5   0  125.19    3.41
   5   5   0  123.92    3.52
   5   5   0  126.49    3.45
   5   5   0  131.01    3.47
   5   5   0  123.75    3.37
  -6  -5   0   69.00    2.18
  -6  -5   0   68.10    2.29
  -6  -5   0   69.62    2.17
  -6  -5   0   71.31    2.31
  -6  -5   0   71.97    2.26
  -6  -5   0   69.58    1.76
  -6  -5   0   67.70    2.10
   6   5   0   66.01    2.27
   6   5   0   67.50    2.09
   6   5   0   69.06    2.22
   6   5   0   70.65    2.22
  -7  -5   0    0.43    0.39
  -7  -5   0    0.32    0.36
  -7  -5   0    0.86    0.43
  -7  -5   0    0.39    0.45
  -7  -5   0    0.86    0.49
   7   5   0    1.21    0.54
   7   5   0    0.81    0.42
   7   5   0    0.56    0.41
   7   5   0    0.44    0.36
  -8  -5   0    4.14    0.60
  -8  -5   0    5.32    0.79
  -8  -5   0    3.82    0.72
  -8  -5   0    4.31    0.58
   8   5   0    3.88    0.58
   8   5   0    3.78    0.64
   8   5   0    3.51    0.69
   8   5   0    4.91    0.68
  -9  -5   0    8.53    1.04
  -9  -5   0    8.53    0.80
  -9  -5   0    8.68    1.05
   9   5   0    8.39    0.80
   9   5   0    6.99    1.01
   9   5   0   10.04    0.97
   9   5   0    8.94    0.92
 -10  -5   0    6.83    1.00
 -10  -5   0    5.96    0.69
 -10  -5   0    5.77    1.00
  10   5   0    6.31    1.01
  10   5   0    5.77    0.98
  10   5   0    5.81    0.84
  10   5   0    7.24    0.89
 -11  -5   0   30.43    1.91
 -11  -5   0   30.66    1.87
  11   5   0   29.55    1.66
  11   5   0   28.65    1.84
  11   5   0   31.58    1.87
  11   5   0   27.08    1.61
 -12  -5   0    7.99    1.28
  12   5   0   10.09    1.35
  12   5   0    8.00    1.29
  12   5   0    9.63    1.13
 -13  -5   0    6.17    1.34
  13   5   0    7.82    1.38
  13   5   0    7.75    1.12
  13   5   0    7.04    1.33
  -8   6   0   21.93    1.99
   7  -6   0    9.77    1.27
   7  -6   0    7.70    1.14
  -7   6   0    8.59    1.30
   6  -6   0    0.59    0.62
   6  -6   0   -0.25    0.59
   6  -6   0    0.03    0.58
   6  -6   0    1.53    0.71
   6  -6   0    1.18    0.63
  -6   6   0    0.94    0.75
   5  -6   0    1.79    0.66
   5  -6   0    2.35    0.75
   5  -6   0    2.52    0.62
   5  -6   0    1.79    0.70
   5  -6   0    2.21    0.74
   5  -6   0    1.28    0.66
   5  -6   0    0.73    0.56
  -5   6   0    1.05    0.65
   4  -6   0    0.09    0.57
   4  -6   0   -0.22    0.44
   4  -6   0   -0.36    0.39
   4  -6   0   -0.08    0.48
   4  -6   0   -0.69    0.48
  -4   6   0   -0.12    0.55
   3  -6   0   16.52    0.66
   3  -6   0   18.00    1.17
   3  -6   0   15.25    1.18
   3  -6   0   15.81    1.10
   3  -6   0   15.64    0.96
   3  -6   0   15.71    0.66
   3  -6   0   13.15    1.18
  -3   6   0   16.71    1.18
   2  -6   0   17.78    0.75
   2  -6   0   18.99    0.90
   2  -6   0   18.45    1.21
   2  -6   0   18.55    0.75
   2  -6   0   18.07    1.09
   2  -6   0   17.24    1.15
   2  -6   0   18.84    1.08
  -2   6   0   18.62    1.16
   1  -6   0    1.09    0.30
   1  -6   0    1.44    0.31
   1  -6   0    1.51    0.55
   1  -6   0    1.30    0.30
   1  -6   0    2.03    0.46
   1  -6   0    1.55    0.50
   1  -6   0    1.56    0.31
   0  -6   0  146.34    4.12
   0  -6   0  144.58    3.70
   0  -6   0  150.53    4.02
   0  -6   0  146.34    3.49
   0  -6   0  145.89    3.72
   0  -6   0  149.38    3.74
   0  -6   0  147.76    3.82
  -1  -6   0   87.33    2.46
  -1  -6   0   85.35    2.72
  -1  -6   0   90.28    2.46
  -1  -6   0   89.60    2.49
  -1  -6   0   92.84    2.69
  -1  -6   0   91.75    2.47
   1   6   0   88.38    2.33
   1   6   0   83.97    2.72
  -2  -6   0    4.53    0.63
  -2  -6   0    4.56    0.50
  -2  -6   0    4.05    0.52
  -2  -6   0    4.17    0.51
  -2  -6   0    5.34    0.66
   2   6   0    3.68    0.46
   2   6   0    5.81    0.68
  -3  -6   0    0.69    0.41
  -3  -6   0    0.56    0.37
  -3  -6   0    0.32    0.35
  -3  -6   0    0.47    0.33
  -3  -6   0    1.24    0.46
   3   6   0    0.60    0.34
   3   6   0    1.14    0.46
   3   6   0    0.32    0.33
   3   6   0    0.49    0.38
  -4  -6   0    3.53    0.56
  -4  -6   0    4.48    0.60
  -4  -6   0    2.88    0.48
  -4  -6   0    4.13    0.53
  -4  -6   0    4.64    0.68
   4   6   0    3.09    0.54
   4   6   0    3.93    0.52
   4   6   0    3.00    0.50
   4   6   0    3.25    0.53
   4   6   0    2.53    0.32
  -5  -6   0    6.39    0.67
  -5  -6   0    6.78    0.70
  -5  -6   0    7.63    0.81
  -5  -6   0    7.91    0.75
  -5  -6   0    6.64    0.67
   5   6   0    7.41    0.79
   5   6   0    6.24    0.69
   5   6   0    6.68    0.68
   5   6   0    7.37    0.73
  -6  -6   0   55.26    1.95
  -6  -6   0   52.45    1.87
  -6  -6   0   53.53    1.88
  -6  -6   0   54.39    2.03
  -6  -6   0   51.92    1.54
  -6  -6   0   53.52    1.87
  -6  -6   0   52.91    1.83
   6   6   0   51.49    1.90
   6   6   0   52.42    1.99
   6   6   0   51.75    1.88
   6   6   0   54.11    1.83
  -7  -6   0   20.09    1.07
  -7  -6   0   19.98    1.25
  -7  -6   0   19.13    1.21
  -7  -6   0   18.65    1.13
  -7  -6   0   19.58    1.12
   7   6   0   19.36    1.24
   7   6   0   18.31    1.12
   7   6   0   18.71    1.05
   7   6   0   20.55    1.19
  -8  -6   0   32.13    1.64
  -8  -6   0   28.40    1.40
  -8  -6   0   29.66    1.34
  -8  -6   0   32.54    1.59
   8   6   0   29.39    1.49
   8   6   0   30.96    1.51
   8   6   0   30.88    1.37
   8   6   0   31.36    1.63
  -9  -6   0   39.50    1.88
  -9  -6   0   35.14    1.57
  -9  -6   0   38.56    1.88
   9   6   0   38.95    1.76
   9   6   0   36.77    1.55
   9   6   0   34.28    1.69
   9   6   0   37.59    1.89
 -10  -6   0    0.11    0.62
 -10  -6   0    0.22    0.66
 -10  -6   0    0.82    0.46
  10   6   0   -0.32    0.49
  10   6   0   -0.10    0.51
  10   6   0    1.11    0.66
  10   6   0    0.98    0.64
 -11  -6   0    6.20    1.10
 -11  -6   0    3.78    0.95
  11   6   0    5.48    0.88
  11   6   0    3.90    0.90
  11   6   0    3.77    0.98
  11   6   0    4.84    0.86
 -12  -6   0    0.63    0.80
 -12  -6   0    2.40    0.89
  12   6   0    0.35    0.62
  12   6   0    1.49    0.84
  12   6   0    0.97    0.80
  12   6   0    0.57    0.62
 -13  -6   0    0.32    0.89
  13   6   0   -0.31    0.83
  13   6   0   -0.52    0.58
  13   6   0    0.42    0.81
  -7   7   0    2.08    0.93
   6  -7   0    1.38    0.74
   6  -7   0   -0.73    0.62
   6  -7   0    0.81    0.81
   6  -7   0    1.64    0.78
  -6   7   0    1.29    0.79
   5  -7   0   18.45    1.44
   5  -7   0   19.18    1.60
   5  -7   0   18.51    1.39
   5  -7   0   18.70    1.63
   5  -7   0   17.40    1.55
  -5   7   0   21.36    1.61
   4  -7   0   24.71    1.61
   4  -7   0   22.09    0.78
   4  -7   0   21.70    0.77
   4  -7   0   22.77    1.54
   4  -7   0   21.83    1.41
  -4   7   0   21.34    1.54
   3  -7   0    1.22    0.58
   3  -7   0    0.27    0.29
   3  -7   0    1.34    0.33
   3  -7   0    2.31    0.74
   3  -7   0    1.13    0.62
   3  -7   0    1.35    0.56
  -3   7   0    1.13    0.64
   2  -7   0   34.41    1.56
   2  -7   0   36.52    1.66
   2  -7   0   38.18    1.78
   2  -7   0   34.66    1.23
   2  -7   0   36.98    1.81
   2  -7   0   37.48    1.25
   1  -7   0    3.57    0.72
   1  -7   0    3.79    0.48
   1  -7   0    4.00    0.70
   1  -7   0    3.97    0.75
   1  -7   0    3.69    0.59
   1  -7   0    3.74    0.48
   0  -7   0    1.23    0.41
   0  -7   0    1.91    0.55
   0  -7   0    1.48    0.57
   0  -7   0    1.20    0.37
   0  -7   0    1.08    0.37
   0  -7   0    1.14    0.37
  -1  -7   0   41.74    1.80
  -1  -7   0   43.77    1.77
  -1  -7   0   46.26    1.55
  -1  -7   0   46.10    1.60
  -1  -7   0   48.40    1.75
  -1  -7   0   47.01    1.57
   1   7   0   43.92    1.36
   1   7   0   47.94    1.90
  -2  -7   0   17.47    1.13
  -2  -7   0   19.74    1.13
  -2  -7   0   17.75    0.96
  -2  -7   0   18.39    0.98
  -2  -7   0   16.80    0.88
   2   7   0   17.00    0.87
   2   7   0   17.49    1.12
  -3  -7   0   11.75    0.77
  -3  -7   0    9.53    0.89
  -3  -7   0   11.89    0.94
  -3  -7   0    8.18    0.76
  -3  -7   0   10.93    0.86
   3   7   0   10.62    0.76
   3   7   0   11.60    0.88
   3   7   0   10.79    0.93
  -4  -7   0   82.62    2.64
  -4  -7   0   83.28    2.53
  -4  -7   0   83.30    2.46
  -4  -7   0   83.45    2.57
  -4  -7   0   80.93    2.64
   4   7   0   81.76    2.49
   4   7   0   80.05    2.03
   4   7   0   82.95    2.51
   4   7   0   80.18    2.64
   4   7   0   82.63    2.58
  -5  -7   0    2.94    0.55
  -5  -7   0    2.49    0.57
  -5  -7   0    3.54    0.62
  -5  -7   0    3.65    0.63
  -5  -7   0    3.29    0.59
   5   7   0    2.39    0.35
   5   7   0    3.27    0.57
   5   7   0    2.63    0.50
   5   7   0    2.97    0.61
   5   7   0    3.58    0.58
  -6  -7   0   32.84    1.47
  -6  -7   0   34.06    1.44
  -6  -7   0   34.81    1.62
  -6  -7   0   33.95    1.49
  -6  -7   0   33.17    1.22
  -6  -7   0   36.25    1.52
  -6  -7   0   31.75    1.47
   6   7   0   34.04    1.50
   6   7   0   31.24    1.58
   6   7   0   33.68    1.48
   6   7   0   32.15    1.24
   6   7   0   32.86    1.44
  -7  -7   0    1.34    0.56
  -7  -7   0    1.18    0.47
  -7  -7   0    0.66    0.49
  -7  -7   0    0.72    0.51
  -7  -7   0    1.66    0.52
  -7  -7   0    1.22    0.55
   7   7   0    1.69    0.54
   7   7   0    1.30    0.49
   7   7   0    0.91    0.41
   7   7   0    0.34    0.54
   7   7   0    1.14    0.47
  -8  -7   0   -0.14    0.46
  -8  -7   0    0.39    0.45
  -8  -7   0    0.08    0.53
  -8  -7   0   -0.36    0.47
  -8  -7   0   -0.49    0.54
   8   7   0    0.52    0.44
   8   7   0    0.43    0.43
   8   7   0    0.03    0.47
   8   7   0   -0.77    0.59
   8   7   0   -0.17    0.43
  -9  -7   0    9.74    1.20
  -9  -7   0    9.39    0.98
  -9  -7   0   12.05    1.17
   9   7   0    9.07    0.97
   9   7   0    8.73    0.99
   9   7   0    9.53    1.12
   9   7   0    8.37    0.98
   9   7   0   11.03    0.99
 -10  -7   0    9.98    1.18
 -10  -7   0    9.30    1.00
 -10  -7   0   10.96    1.28
  10   7   0    9.89    1.11
  10   7   0   11.76    1.18
  10   7   0    8.11    1.22
  10   7   0   10.10    1.11
 -11  -7   0    8.34    0.94
 -11  -7   0    5.50    1.06
 -11  -7   0    6.23    1.11
  11   7   0    7.62    1.05
  11   7   0    7.23    1.15
  11   7   0    6.31    1.07
  11   7   0    8.09    1.10
 -12  -7   0   31.26    2.01
 -12  -7   0   29.96    2.02
  12   7   0   30.27    1.82
  12   7   0   27.03    1.96
  12   7   0   27.61    1.85
  12   7   0   29.36    1.83
 -13  -7   0    4.53    1.18
 -13  -7   0    4.80    1.20
  13   7   0    5.50    1.20
  13   7   0    5.79    1.07
  13   7   0    6.66    1.11
  13   7   0    3.67    1.12
   6  -8   0    5.89    1.20
   6  -8   0    4.61    1.10
   6  -8   0    5.74    1.15
   5  -8   0    0.37    0.70
   5  -8   0    0.17    0.82
   5  -8   0    0.59    0.71
   5  -8   0    0.18    0.74
   4  -8   0    5.24    0.95
   4  -8   0    2.93    0.39
   4  -8   0    3.89    1.02
   4  -8   0    3.01    0.91
   3  -8   0    8.44    1.06
   3  -8   0    7.00    1.12
   3  -8   0    6.63    0.57
   3  -8   0    7.78    1.13
   2  -8   0    8.26    1.10
   2  -8   0    4.76    0.86
   2  -8   0    6.17    0.92
   2  -8   0    5.06    0.55
   1  -8   0   43.46    1.54
   1  -8   0   41.72    1.87
   1  -8   0   41.28    1.96
   1  -8   0   46.07    2.13
   0  -8   0    9.08    0.76
   0  -8   0   11.44    1.10
   0  -8   0   10.77    0.79
   0  -8   0    9.67    0.82
   0  -8   0    8.67    1.05
   0  -8   0   11.11    1.10
  -1  -8   0   23.99    1.43
  -1  -8   0   21.65    1.31
  -1  -8   0   24.10    1.14
  -1  -8   0   22.30    1.14
  -1  -8   0   24.52    1.13
   1   8   0   23.30    0.85
  -2  -8   0   11.22    1.07
  -2  -8   0    9.21    0.95
  -2  -8   0    9.22    0.83
  -2  -8   0   10.39    0.77
  -2  -8   0   10.10    0.87
   2   8   0    9.17    0.68
   2   8   0    9.99    1.05
  -3  -8   0    4.00    0.73
  -3  -8   0    1.93    0.52
  -3  -8   0    2.17    0.53
  -3  -8   0    4.07    0.73
  -3  -8   0    3.54    0.55
   3   8   0    3.16    0.69
   3   8   0    2.62    0.50
  -4  -8   0    1.88    0.50
  -4  -8   0    1.78    0.65
  -4  -8   0    1.70    0.52
  -4  -8   0    1.65    0.62
  -4  -8   0    1.91    0.54
   4   8   0    2.04    0.64
   4   8   0    1.69    0.47
  -5  -8   0    1.49    0.58
  -5  -8   0    2.11    0.61
  -5  -8   0    0.31    0.46
  -5  -8   0    0.57    0.46
  -5  -8   0    1.07    0.46
  -5  -8   0    0.61    0.43
   5   8   0    0.49    0.45
   5   8   0    1.01    0.50
   5   8   0    0.01    0.50
  -6  -8   0    9.41    0.96
  -6  -8   0    9.45    1.02
  -6  -8   0    8.87    0.91
  -6  -8   0   10.80    1.01
  -6  -8   0    7.70    0.73
  -6  -8   0    7.90    0.87
   6   8   0    8.41    0.60
   6   8   0    8.68    0.88
   6   8   0    8.79    0.97
   6   8   0    7.31    0.84
   6   8   0    9.76    1.08
  -7  -8   0   85.01    2.98
  -7  -8   0   89.35    2.89
  -7  -8   0   87.52    2.48
  -7  -8   0   90.97    2.86
  -7  -8   0   87.81    2.79
  -7  -8   0   89.55    2.86
   7   8   0   87.86    2.80
   7   8   0   80.92    2.83
   7   8   0   81.42    2.94
   7   8   0   84.41    2.86
   7   8   0   82.23    2.52
  -8  -8   0   13.55    1.31
  -8  -8   0   11.68    1.10
  -8  -8   0   11.30    1.08
  -8  -8   0   12.68    1.14
  -8  -8   0   13.57    1.24
   8   8   0   13.99    1.22
   8   8   0   11.46    0.92
   8   8   0   14.36    1.26
   8   8   0   11.73    1.23
   8   8   0   13.87    1.13
  -9  -8   0    6.29    0.86
  -9  -8   0    5.44    0.90
  -9  -8   0    4.28    0.88
  -9  -8   0    5.87    0.97
   9   8   0    7.03    0.88
   9   8   0    5.25    0.80
   9   8   0    7.41    1.03
   9   8   0    6.49    0.89
   9   8   0    6.38    0.95
 -10  -8   0   17.03    1.26
 -10  -8   0   14.73    1.52
 -10  -8   0   15.67    1.49
  10   8   0   16.66    1.41
  10   8   0   14.16    1.36
  10   8   0   15.44    1.24
  10   8   0   16.00    1.52
 -11  -8   0   -1.22    0.63
 -11  -8   0    0.35    0.55
 -11  -8   0   -0.23    0.71
  11   8   0    1.21    0.65
  11   8   0    0.00    0.60
  11   8   0    0.29    0.71
  11   8   0    0.28    0.62
 -12  -8   0    2.44    1.00
 -12  -8   0    2.90    1.06
 -12  -8   0    2.95    0.93
  12   8   0    1.97    0.84
  12   8   0    1.79    1.02
  12   8   0    2.47    0.82
  12   8   0    0.93    0.75
 -13  -8   0    9.10    1.40
 -13  -8   0    8.09    1.45
  13   8   0    9.39    1.54
  13   8   0    8.86    1.25
  13   8   0    7.17    1.26
  13   8   0    8.38    1.23
   5  -9   0    5.80    1.25
   5  -9   0    4.46    1.12
   5  -9   0    3.33    1.13
   4  -9   0   11.29    1.50
   4  -9   0    7.60    0.58
   4  -9   0    6.93    1.21
   3  -9   0   15.92    1.60
   3  -9   0   15.78    1.60
   3  -9   0   16.78    0.89
   3  -9   0   16.62    1.49
   2  -9   0    1.21    0.71
   2  -9   0    1.60    0.84
   2  -9   0   -0.27    0.71
   2  -9   0    0.37    0.40
   1  -9   0    0.30    0.61
   1  -9   0    1.49    0.77
   1  -9   0    0.35    0.67
   1  -9   0    0.12    0.40
   0  -9   0    1.17    0.66
   0  -9   0    0.93    0.45
   0  -9   0    0.78    0.70
   0  -9   0    1.22    0.68
  -1  -9   0    1.22    0.72
  -1  -9   0    1.05    0.46
  -1  -9   0    1.73    0.54
  -1  -9   0    1.63    0.70
  -1  -9   0    2.83    0.75
  -2  -9   0   59.91    2.60
  -2  -9   0   55.42    2.02
  -2  -9   0   57.93    2.28
  -2  -9   0   54.17    2.33
  -2  -9   0   57.27    2.05
  -2  -9   0   56.76    2.26
   2   9   0   55.42    1.76
   2   9   0   58.45    2.38
  -3  -9   0   10.03    0.86
  -3  -9   0   11.41    0.98
  -3  -9   0   11.92    1.17
  -3  -9   0    9.82    0.94
  -3  -9   0   11.68    1.10
  -3  -9   0    8.89    1.10
   3   9   0   11.82    1.16
   3   9   0   10.25    0.85
  -4  -9   0   17.78    1.22
  -4  -9   0   16.31    1.29
  -4  -9   0   18.34    1.21
  -4  -9   0   17.75    1.06
  -4  -9   0   20.19    1.37
  -4  -9   0   19.76    1.22
   4   9   0   17.60    1.10
   4   9   0   19.14    1.34
  -5  -9   0   51.69    2.05
  -5  -9   0   53.68    2.09
  -5  -9   0   53.31    1.96
  -5  -9   0   52.85    1.99
  -5  -9   0   52.26    2.17
  -5  -9   0   52.67    2.21
   5   9   0   52.26    1.99
   5   9   0   53.23    2.24
  -6  -9   0    7.57    0.82
  -6  -9   0   10.18    1.06
  -6  -9   0    9.02    0.93
  -6  -9   0    7.98    1.09
  -6  -9   0    7.31    0.92
  -6  -9   0    8.43    1.02
   6   9   0    6.02    0.90
   6   9   0    6.54    0.84
   6   9   0    7.61    0.94
  -7  -9   0    0.15    0.41
  -7  -9   0    0.85    0.62
  -7  -9   0   -0.27    0.48
  -7  -9   0    1.23    0.62
  -7  -9   0    0.63    0.54
  -7  -9   0   -0.10    0.51
   7   9   0    0.65    0.58
   7   9   0   -0.27    0.47
   7   9   0    0.64    0.58
  -8  -9   0    8.23    1.02
  -8  -9   0    9.58    1.20
  -8  -9   0    8.16    1.03
  -8  -9   0    7.64    0.95
  -8  -9   0    6.87    0.91
   8   9   0    8.70    1.02
   8   9   0    7.96    0.96
   8   9   0    7.80    1.07
  -9  -9   0    1.08    0.69
  -9  -9   0    0.58    0.61
  -9  -9   0    0.89    0.61
  -9  -9   0    0.73    0.73
  -9  -9   0    0.20    0.60
   9   9   0    1.29    0.77
   9   9   0    1.08    0.63
   9   9   0    1.29    0.57
 -10  -9   0   20.71    1.52
 -10  -9   0   17.02    1.61
 -10  -9   0   17.38    1.44
  10   9   0   17.10    1.58
  10   9   0   17.89    1.52
 -11  -9   0   21.61    1.90
 -11  -9   0   21.54    1.51
 -11  -9   0   22.17    1.72
  11   9   0   25.25    1.72
  11   9   0   23.09    1.73
 -12  -9   0    0.67    0.83
 -12  -9   0   -1.20    0.79
 -12  -9   0    0.57    0.64
  12   9   0   -0.57    1.04
  12   9   0   -1.32    0.58
  12   9   0    1.10    0.93
 -13  -9   0   14.66    1.77
 -13  -9   0   15.53    1.73
  13   9   0   18.51    1.91
  13   9   0   19.37    1.77
  13   9   0   17.12    1.79
   4 -10   0    0.36    0.33
   4 -10   0    2.18    0.93
   4 -10   0    0.06    0.80
   4 -10   0   -0.54    0.86
   3 -10   0   11.55    1.51
   3 -10   0   10.44    1.44
   3 -10   0    8.24    0.73
   2 -10   0    4.33    0.62
   2 -10   0    5.38    1.11
   2 -10   0    6.73    1.12
   2 -10   0    2.94    1.07
   1 -10   0   10.86    0.91
   1 -10   0   11.12    1.36
   1 -10   0   13.47    1.49
   1 -10   0   12.85    1.34
   0 -10   0   58.92    2.58
   0 -10   0   53.17    2.02
   0 -10   0   57.55    2.43
   0 -10   0   60.22    2.67
  -1 -10   0    3.65    0.87
  -1 -10   0    4.31    0.69
  -1 -10   0    2.08    0.88
  -1 -10   0    3.60    0.88
  -2 -10   0    0.45    0.63
  -2 -10   0    0.75    0.51
  -2 -10   0    1.00    0.71
  -2 -10   0    0.08    0.65
  -2 -10   0    0.36    0.51
   2  10   0    0.76    0.75
  -3 -10   0    1.70    0.76
  -3 -10   0    3.93    0.74
  -3 -10   0    1.11    0.72
  -3 -10   0    3.12    0.79
  -3 -10   0    2.75    0.66
   3  10   0    2.91    0.53
   3  10   0    3.36    0.89
  -4 -10   0    0.06    0.65
  -4 -10   0    0.51    0.65
  -4 -10   0    0.58    0.58
  -4 -10   0   -0.06    0.46
  -4 -10   0   -0.12    0.50
   4  10   0    0.48    0.44
   4  10   0   -0.04    0.65
  -5 -10   0   14.07    1.06
  -5 -10   0   15.19    1.41
  -5 -10   0   16.54    1.28
  -5 -10   0   14.42    1.22
  -5 -10   0   14.48    1.41
  -5 -10   0   13.41    1.17
   5  10   0   12.93    1.08
   5  10   0   13.43    1.36
  -6 -10   0   28.07    1.71
  -6 -10   0   27.20    1.43
  -6 -10   0   23.13    1.36
  -6 -10   0   26.34    1.57
  -6 -10   0   24.64    1.60
  -6 -10   0   26.45    1.54
   6  10   0   29.51    1.52
   6  10   0   25.59    1.61
  -7 -10   0    0.57    0.58
  -7 -10   0    0.59    0.65
  -7 -10   0    0.58    0.56
  -7 -10   0    1.66    0.63
  -7 -10   0    1.51    0.72
  -7 -10   0   -0.25    0.44
  -7 -10   0    1.96    0.89
   7  10   0   -0.19    0.56
   7  10   0    0.31    0.53
   7  10   0    0.81    0.66
  -8 -10   0   43.08    2.06
  -8 -10   0   48.22    2.15
  -8 -10   0   44.78    2.06
  -8 -10   0   43.18    1.96
  -8 -10   0   43.50    2.26
   8  10   0   46.22    2.26
   8  10   0   43.59    2.06
   8  10   0   44.32    2.04
  -9 -10   0   13.07    1.36
  -9 -10   0   12.11    1.23
  -9 -10   0   14.71    1.32
  -9 -10   0   16.09    1.65
  -9 -10   0   13.41    1.36
   9  10   0   18.15    1.45
   9  10   0   12.44    1.27
   9  10   0   11.50    1.34
 -10 -10   0    2.76    0.82
 -10 -10   0    1.92    0.92
 -10 -10   0    0.58    0.67
  10  10   0    1.13    0.74
  10  10   0    3.57    1.26
  10  10   0    1.19    0.82
 -11 -10   0    3.84    0.86
 -11 -10   0    2.01    0.83
 -11 -10   0    2.90    1.07
  11  10   0    1.87    0.79
  11  10   0    2.67    1.01
 -12 -10   0    0.29    0.91
 -12 -10   0   -0.32    0.63
 -12 -10   0   -1.04    0.69
  12  10   0    0.53    0.83
  12  10   0    1.32    0.77
 -13 -10   0    4.84    1.31
 -13 -10   0    5.20    1.00
 -13 -10   0    5.39    1.26
  13  10   0    5.99    1.33
  13  10   0    2.78    0.91
   3 -11   0    2.76    1.14
   3 -11   0    3.33    0.58
   3 -11   0    5.15    1.32
   2 -11   0    2.99    1.06
   2 -11   0    3.77    0.64
   2 -11   0    2.80    0.99
   2 -11   0    6.18    1.35
   1 -11   0    0.49    0.81
   1 -11   0    0.86    0.52
   1 -11   0   -0.12    0.86
   1 -11   0    0.36    0.84
   0 -11   0    2.02    0.61
   0 -11   0    1.08    0.91
   0 -11   0    1.56    0.83
   0 -11   0    0.92    0.85
  -1 -11   0    6.64    1.20
  -1 -11   0    6.15    1.11
  -1 -11   0    5.59    1.09
  -1 -11   0    6.78    0.87
  -2 -11   0    2.15    0.84
  -2 -11   0    2.52    0.86
  -2 -11   0    1.13    0.59
  -2 -11   0    3.03    1.00
  -3 -11   0   43.60    1.98
  -3 -11   0   47.37    2.29
  -3 -11   0   42.33    1.96
  -3 -11   0   38.62    2.21
  -3 -11   0   45.71    2.18
   3  11   0   45.96    2.32
  -4 -11   0   15.93    1.31
  -4 -11   0   14.47    1.51
  -4 -11   0   14.29    1.28
  -4 -11   0   16.33    1.44
  -4 -11   0   17.25    1.56
   4  11   0   15.67    1.08
   4  11   0   15.99    1.58
  -5 -11   0    5.83    1.06
  -5 -11   0    5.20    0.93
  -5 -11   0    6.54    0.95
  -5 -11   0    6.67    1.15
  -5 -11   0    5.82    0.90
   5  11   0    4.95    1.07
   5  11   0    5.33    0.78
  -6 -11   0   17.62    1.45
  -6 -11   0   19.07    1.67
  -6 -11   0   14.29    1.35
  -6 -11   0   17.71    1.56
  -6 -11   0   17.41    1.41
   6  11   0   16.79    1.60
   6  11   0   16.60    1.27
  -7 -11   0    1.67    0.68
  -7 -11   0    1.90    0.72
  -7 -11   0    0.02    0.68
  -7 -11   0    1.03    0.62
  -7 -11   0    1.47    0.86
   7  11   0   -0.17    0.57
   7  11   0    0.39    0.73
  -8 -11   0    0.26    0.74
  -8 -11   0    0.65    0.61
  -8 -11   0    1.09    0.72
  -8 -11   0    2.07    0.94
   8  11   0    1.77    0.88
   8  11   0    0.95    0.67
  -9 -11   0   12.06    1.80
  -9 -11   0    9.50    1.34
  -9 -11   0   13.38    1.46
  -9 -11   0   11.05    1.28
  -9 -11   0   13.64    1.37
   9  11   0   11.87    1.50
   9  11   0   12.30    1.26
   9  11   0   13.29    1.35
 -10 -11   0    2.07    0.98
 -10 -11   0    0.89    0.71
 -10 -11   0    0.26    0.64
  10  11   0    1.01    0.67
  10  11   0    1.06    0.87
  10  11   0    0.49    0.66
 -11 -11   0   18.45    1.64
 -11 -11   0   19.46    1.91
 -11 -11   0   19.45    1.70
  11  11   0   22.11    2.13
  11  11   0   21.43    1.79
 -12 -11   0   15.79    1.86
 -12 -11   0   17.26    1.69
 -12 -11   0   14.57    1.49
  12  11   0   15.24    1.82
  12  11   0   13.94    1.54
   2 -12   0   12.03    1.69
   2 -12   0    8.87    1.57
   1 -12   0   10.84    1.05
   1 -12   0    9.33    1.54
   1 -12   0   11.00    1.61
   1 -12   0   10.86    1.51
   0 -12   0    1.71    0.93
   0 -12   0    4.07    1.16
   0 -12   0    1.82    0.99
   0 -12   0    2.67    0.67
  -1 -12   0   15.11    1.76
  -1 -12   0   15.17    1.69
  -1 -12   0   17.69    1.69
  -1 -12   0   12.98    1.22
  -2 -12   0    1.05    0.91
  -2 -12   0    0.64    0.89
  -2 -12   0    0.29    0.82
  -2 -12   0    0.15    0.59
  -3 -12   0    1.84    0.96
  -3 -12   0    1.39    0.85
  -3 -12   0    0.70    0.68
  -3 -12   0    1.16    0.71
  -3 -12   0    1.42    0.85
  -4 -12   0    1.38    0.72
  -4 -12   0    2.29    0.94
  -4 -12   0    1.20    0.74
  -4 -12   0    1.18    0.80
  -4 -12   0    2.20    0.96
   4  12   0    2.48    0.94
  -5 -12   0    1.05    0.86
  -5 -12   0    1.09    0.72
  -5 -12   0    1.44    0.77
  -5 -12   0   -0.58    0.75
  -5 -12   0    1.23    0.73
   5  12   0    1.49    0.58
   5  12   0   -0.40    0.77
  -6 -12   0   12.55    1.46
  -6 -12   0   14.57    1.60
  -6 -12   0   14.19    1.43
  -6 -12   0   13.70    1.35
  -6 -12   0   16.84    1.48
   6  12   0   12.95    1.53
   6  12   0   15.38    1.30
  -7 -12   0   25.90    2.03
  -7 -12   0   27.27    1.93
  -7 -12   0   23.54    1.75
  -7 -12   0   22.39    1.67
   7  12   0   23.28    2.01
   7  12   0   23.64    1.59
  -8 -12   0    1.18    0.70
  -8 -12   0   -0.46    0.74
  -8 -12   0    0.31    0.88
   8  12   0    0.76    0.89
   8  12   0    0.47    0.66
  -9 -12   0   16.63    1.81
  -9 -12   0   17.97    1.71
  -9 -12   0   18.10    1.58
   9  12   0   14.52    1.68
   9  12   0   17.85    1.63
 -10 -12   0    1.96    1.00
 -10 -12   0    2.84    0.89
  10  12   0    2.82    1.10
  10  12   0   -0.19    0.74
 -11 -12   0    0.52    1.02
 -11 -12   0    0.59    0.75
  11  12   0    0.09    0.89
  11  12   0    0.45    0.73
 -12 -12   0   -0.57    0.68
 -12 -12   0   -0.10    1.02
  12  12   0    0.14    0.80
  12  12   0    0.14    0.99
   0 -13   0   -0.60    1.05
   0 -13   0    0.96    0.98
   0 -13   0    1.19    0.68
   0 -13   0    1.42    1.07
  -1 -13   0    5.69    0.98
  -1 -13   0    6.55    1.39
  -1 -13   0    6.47    1.31
  -1 -13   0    8.98    1.43
  -2 -13   0    8.37    1.07
  -2 -13   0    8.07    1.47
  -2 -13   0    6.34    1.30
  -2 -13   0    9.05    1.37
  -3 -13   0    1.63    1.03
  -3 -13   0    2.95    1.03
  -3 -13   0    1.64    0.93
  -3 -13   0    1.14    0.76
  -4 -13   0   16.79    1.76
  -4 -13   0   18.27    1.58
  -4 -13   0   18.70    1.79
  -4 -13   0   19.31    1.64
  -4 -13   0   19.48    1.95
   4  13   0   23.59    2.10
  -5 -13   0    3.98    1.16
  -5 -13   0    5.70    1.02
  -5 -13   0    5.86    1.03
  -5 -13   0    8.06    1.27
  -5 -13   0    6.08    1.26
   5  13   0    6.49    1.35
  -6 -13   0    2.55    1.03
  -6 -13   0    1.23    0.79
  -6 -13   0    1.29    0.95
  -6 -13   0    0.10    0.74
  -6 -13   0    0.86    0.78
   6  13   0    1.18    0.66
   6  13   0    0.87    0.88
  -7 -13   0    1.04    0.79
  -7 -13   0   -0.31    0.87
  -7 -13   0    1.29    0.95
   7  13   0    2.38    1.04
   7  13   0    1.38    0.69
  -8 -13   0   -0.60    0.81
  -8 -13   0   -1.22    0.74
  -8 -13   0   -0.46    0.70
   8  13   0    1.93    0.79
   8  13   0    0.17    0.88
  -9 -13   0    1.52    0.86
  -9 -13   0    1.27    0.95
  -9 -13   0    1.93    1.06
   9  13   0    2.37    1.05
   9  13   0    0.38    0.74
 -10 -13   0   16.01    1.87
 -10 -13   0   16.94    1.65
  10  13   0   14.79    1.54
  10  13   0   16.83    1.89
 -11 -13   0    1.51    0.90
 -11 -13   0    0.97    1.04
  11  13   0    2.50    1.14
  11  13   0    2.40    0.92
  -3 -14   0    0.20    0.72
  -3 -14   0    0.67    1.02
  -3 -14   0   -1.85    0.82
  -3 -14   0    0.59    0.95
  -4 -14   0    0.11    0.68
  -4 -14   0    3.09    1.09
  -4 -14   0    4.40    1.22
  -4 -14   0    1.62    1.15
  -5 -14   0    8.70    1.53
  -5 -14   0   13.77    1.75
  -5 -14   0   13.37    1.64
  -5 -14   0   12.67    1.46
  -5 -14   0   12.69    1.46
   5  14   0   12.78    1.69
  -6 -14   0    1.57    1.10
  -6 -14   0    2.36    0.98
  -6 -14   0    2.35    1.10
  -6 -14   0    1.82    0.93
  -6 -14   0    0.87    0.81
   6  14   0    1.84    1.10
  -7 -14   0   10.64    1.60
  -7 -14   0    9.36    1.29
  -7 -14   0   11.13    1.58
   7  14   0    8.28    1.48
   7  14   0    8.16    1.12
  -8 -14   0   24.04    2.21
  -8 -14   0   22.15    2.17
  -8 -14   0   24.63    2.01
   8  14   0   19.38    2.05
   8  14   0   21.65    1.65
  -9 -14   0   -0.09    0.80
  -9 -14   0    1.00    1.09
  -9 -14   0    0.80    1.01
   9  14   0    1.04    1.07
   9  14   0    0.14    0.73
   9  14  -1   -0.56    0.90
   9  14  -1    0.47    0.71
  -9 -14   1    2.89    1.13
  -9 -14   1    0.12    0.84
  -9 -14   1   -0.16    1.02
   8  14  -1    1.25    0.80
   8  14  -1   -0.80    0.97
  -8 -14   1    2.81    1.18
  -8 -14   1    0.33    0.86
  -8 -14   1    1.11    1.00
   7  14  -1    8.35    1.11
   7  14  -1    8.80    1.56
  -7 -14   1    6.30    1.34
  -7 -14   1    8.28    1.28
  -7 -14   1    9.40    1.53
   6  14  -1   16.14    1.86
  -6 -14   1   17.64    1.75
  -6 -14   1   19.09    1.76
  -6 -14   1   20.87    2.04
  -6 -14   1   21.65    1.88
  -6 -14   1   21.40    2.06
   5  14  -1   -0.20    0.90
  -5 -14   1    2.49    1.03
  -5 -14   1    0.93    1.01
  -5 -14   1    0.68    0.96
  -5 -14   1    1.66    0.81
  -5 -14   1    0.63    0.80
  -4 -14   1   23.62    2.12
  -4 -14   1   18.98    2.03
  -4 -14   1   20.85    2.04
  -4 -14   1   18.46    1.70
  -3 -14   1    4.00    1.29
  -3 -14   1    5.05    1.24
  -3 -14   1    6.41    1.35
  -3 -14   1    6.82    1.10
  11  13  -1   14.23    1.57
  11  13  -1    8.84    1.61
 -11 -13   1   11.34    1.66
 -11 -13   1   11.58    1.55
  10  13  -1    0.81    0.95
  10  13  -1    0.35    0.69
 -10 -13   1    1.46    0.85
 -10 -13   1    0.06    0.92
   9  13  -1   21.17    1.77
   9  13  -1   17.79    1.96
  -9 -13   1   20.13    1.93
  -9 -13   1   20.03    1.84
  -9 -13   1   23.28    2.14
   8  13  -1   14.48    1.42
   8  13  -1   13.95    1.67
  -8 -13   1   15.50    1.75
  -8 -13   1   19.40    1.74
  -8 -13   1   14.72    1.76
   7  13  -1    0.64    0.94
   7  13  -1   -0.37    0.59
  -7 -13   1    0.63    0.92
  -7 -13   1    0.83    0.92
  -7 -13   1    1.30    0.80
   6  13  -1    1.73    0.95
   6  13  -1    1.62    0.75
  -6 -13   1    1.78    0.85
  -6 -13   1    2.01    1.00
  -6 -13   1    2.06    0.85
  -6 -13   1    1.05    0.79
  -6 -13   1    1.56    1.04
   5  13  -1    1.05    0.98
  -5 -13   1    2.67    1.09
  -5 -13   1    0.08    0.71
  -5 -13   1    0.87    0.86
  -5 -13   1    2.00    0.82
  -5 -13   1    1.13    0.96
   4  13  -1    5.71    1.26
  -4 -13   1    4.36    1.12
  -4 -13   1    5.76    1.04
  -4 -13   1    6.43    1.06
  -4 -13   1    4.13    1.23
  -4 -13   1    6.10    1.14
  -3 -13   1   16.00    1.45
  -3 -13   1   17.31    1.70
  -3 -13   1   23.50    2.14
  -3 -13   1   14.87    1.74
  -2 -13   1    3.83    0.92
  -2 -13   1    4.28    1.13
  -2 -13   1    5.30    1.25
  -2 -13   1    3.41    1.14
  -1 -13   1   10.40    1.72
  -1 -13   1   11.18    1.50
  -1 -13   1    8.11    1.05
  -1 -13   1    9.45    1.50
   0 -13   1   10.82    1.72
   0 -13   1    9.37    2.13
   0 -13   1    9.49    1.53
   0 -13   1   12.06    1.21
  12  12  -1    0.47    0.87
  12  12  -1    0.14    1.01
 -12 -12   1    2.00    0.89
 -12 -12   1    0.81    1.06
  11  12  -1    4.23    1.20
  11  12  -1    3.82    0.98
 -11 -12   1    5.30    1.33
 -11 -12   1    4.01    0.98
  10  12  -1    2.70    1.07
  10  12  -1   -0.07    0.73
 -10 -12   1   -1.37    0.84
 -10 -12   1    0.64    0.73
   9  12  -1    1.11    0.94
   9  12  -1   -0.32    0.61
  -9 -12   1    1.01    0.72
  -9 -12   1    0.88    0.96
  -9 -12   1    0.19    0.79
   8  12  -1   14.66    1.62
   8  12  -1   12.81    1.31
  -8 -12   1   12.85    1.38
  -8 -12   1   12.31    1.50
  -8 -12   1   15.36    1.72
   7  12  -1    7.75    1.05
   7  12  -1    9.36    1.41
  -7 -12   1    9.80    1.41
  -7 -12   1   10.30    1.47
  -7 -12   1   10.15    1.28
   6  12  -1    8.87    1.05
   6  12  -1   13.77    1.57
  -6 -12   1   10.46    1.39
  -6 -12   1    7.81    1.32
  -6 -12   1   12.23    1.33
  -6 -12   1   14.12    1.37
  -6 -12   1   13.56    1.38
   5  12  -1   22.92    1.39
   5  12  -1   25.48    1.88
  -5 -12   1   24.08    1.67
  -5 -12   1   25.50    1.66
  -5 -12   1   24.13    1.65
  -5 -12   1   25.59    1.84
  -5 -12   1   23.71    1.81
   4  12  -1    1.53    0.85
  -4 -12   1    0.39    0.64
  -4 -12   1   -0.42    0.73
  -4 -12   1    1.63    0.95
  -4 -12   1    0.77    0.77
  -4 -12   1    0.01    0.63
  -3 -12   1    7.99    1.08
  -3 -12   1    7.90    1.39
  -3 -12   1    8.30    1.27
  -3 -12   1    7.26    1.02
  -3 -12   1    5.45    1.07
  -2 -12   1    0.85    0.65
  -2 -12   1    0.83    0.81
  -2 -12   1   -0.53    0.72
  -2 -12   1    1.17    1.01
  -1 -12   1    0.20    0.60
  -1 -12   1    0.68    0.86
  -1 -12   1    0.89    0.92
  -1 -12   1   -0.47    0.77
   0 -12   1    7.77    1.34
   0 -12   1    7.93    1.28
   0 -12   1    6.69    0.92
   0 -12   1    5.98    1.32
   1 -12   1    7.36    0.90
   1 -12   1    6.74    1.36
   1 -12   1    6.94    1.43
   2 -12   1    2.03    1.12
   2 -12   1    2.16    1.23
  12  11  -1    5.15    1.21
  12  11  -1    5.37    1.12
 -12 -11   1    8.30    1.46
 -12 -11   1    5.90    1.77
 -12 -11   1    4.32    0.98
  11  11  -1   14.97    1.78
  11  11  -1   12.91    1.44
 -11 -11   1   14.07    1.47
 -11 -11   1   12.21    1.59
  10  11  -1   20.58    1.74
  10  11  -1   22.04    1.99
 -10 -11   1   24.37    1.69
 -10 -11   1   20.56    1.89
   9  11  -1    9.90    1.15
   9  11  -1   10.28    1.18
   9  11  -1   11.22    1.50
  -9 -11   1    7.08    1.07
  -9 -11   1    8.82    1.21
  -9 -11   1    8.42    1.16
  -9 -11   1    6.71    1.24
   8  11  -1    5.98    0.98
   8  11  -1    7.09    1.24
  -8 -11   1    9.17    1.11
  -8 -11   1    6.88    1.17
  -8 -11   1    7.99    1.12
  -8 -11   1    7.92    1.18
   7  11  -1    1.99    0.69
   7  11  -1    2.05    0.89
  -7 -11   1    3.45    0.95
  -7 -11   1    4.68    0.87
  -7 -11   1    3.62    0.80
  -7 -11   1    1.43    0.89
   6  11  -1    0.61    0.57
   6  11  -1    0.41    0.78
  -6 -11   1    0.54    0.59
  -6 -11   1    0.69    0.79
  -6 -11   1   -0.39    0.55
  -6 -11   1    0.28    0.60
  -6 -11   1    0.14    0.76
   5  11  -1    0.54    0.55
   5  11  -1    3.38    0.91
  -5 -11   1    1.94    0.72
  -5 -11   1    2.66    0.78
  -5 -11   1    2.20    0.75
  -5 -11   1    1.78    0.82
  -5 -11   1    2.27    0.86
   4  11  -1   14.35    1.50
   4  11  -1   13.60    1.09
  -4 -11   1   13.86    1.24
  -4 -11   1   12.32    1.31
  -4 -11   1   13.77    1.26
  -4 -11   1   15.87    1.55
  -4 -11   1   12.36    1.39
   3  11  -1    5.82    1.12
  -3 -11   1    6.42    1.20
  -3 -11   1    9.42    1.18
  -3 -11   1    6.66    1.11
  -3 -11   1    8.26    0.99
  -3 -11   1    7.41    0.96
  -2 -11   1   33.68    2.06
  -2 -11   1   32.07    1.94
  -2 -11   1   37.11    1.74
  -2 -11   1   32.84    1.91
  -1 -11   1   13.87    1.55
  -1 -11   1   15.82    1.19
  -1 -11   1   17.05    1.63
  -1 -11   1   14.30    1.44
   0 -11   1    3.53    1.07
   0 -11   1    5.65    1.06
   0 -11   1    3.12    1.03
   0 -11   1    3.98    0.72
   1 -11   1    9.82    1.44
   1 -11   1    7.60    0.88
   1 -11   1    7.58    1.20
   1 -11   1    8.95    1.42
   2 -11   1    1.37    0.99
   2 -11   1   -0.04    0.84
   2 -11   1    1.80    0.56
   3 -11   1    3.09    1.21
   3 -11   1    1.44    0.53
   3 -11   1    3.35    1.14
  13  10  -1   10.03    1.38
  13  10  -1    8.26    1.48
 -13 -10   1   10.33    1.45
 -13 -10   1    6.57    1.44
 -13 -10   1   11.47    1.34
  12  10  -1   10.07    1.35
  12  10  -1   10.27    1.54
 -12 -10   1    9.01    1.48
 -12 -10   1    9.84    1.21
 -12 -10   1    9.83    1.38
  11  10  -1    0.11    0.85
  11  10  -1    1.06    0.77
 -11 -10   1    0.51    0.85
 -11 -10   1    0.97    0.76
 -11 -10   1    2.42    0.76
  10  10  -1    0.83    0.86
  10  10  -1    0.52    0.70
 -10 -10   1    0.51    0.67
 -10 -10   1   -0.14    0.79
 -10 -10   1    0.62    0.67
   9  10  -1    1.75    0.87
   9  10  -1    1.18    0.67
   9  10  -1    1.03    0.62
  -9 -10   1    0.14    0.76
  -9 -10   1    0.01    0.56
  -9 -10   1   -0.77    0.57
  -9 -10   1    0.32    0.59
  -9 -10   1    1.58    0.73
   8  10  -1    3.56    0.78
   8  10  -1    3.46    0.78
   8  10  -1    0.33    0.64
  -8 -10   1    3.75    0.78
  -8 -10   1    2.83    0.79
  -8 -10   1    4.05    0.83
  -8 -10   1    2.99    0.84
  -8 -10   1    3.65    0.89
   7  10  -1   40.49    1.92
   7  10  -1   44.24    2.20
  -7 -10   1   41.61    1.90
  -7 -10   1   44.78    2.02
  -7 -10   1   43.09    2.18
  -7 -10   1   45.17    1.81
  -7 -10   1   48.93    2.18
  -7 -10   1   46.16    1.89
   6  10  -1   14.27    1.39
   6  10  -1   14.05    1.20
  -6 -10   1   18.00    1.44
  -6 -10   1   15.22    1.14
  -6 -10   1   18.12    1.32
  -6 -10   1   15.65    1.18
  -6 -10   1   14.89    1.28
  -6 -10   1   13.88    1.35
   5  10  -1   28.34    1.73
   5  10  -1   27.93    1.43
  -5 -10   1   29.67    1.61
  -5 -10   1   30.83    1.55
  -5 -10   1   29.59    1.74
  -5 -10   1   28.77    1.70
  -5 -10   1   26.55    1.47
  -5 -10   1   24.55    1.31
   4  10  -1   41.24    1.69
   4  10  -1   40.17    2.05
  -4 -10   1   42.05    2.04
  -4 -10   1   43.49    1.87
  -4 -10   1   42.07    2.08
  -4 -10   1   38.89    1.84
  -4 -10   1   39.79    1.87
   3  10  -1    6.61    0.68
   3  10  -1    5.32    1.03
  -3 -10   1    6.66    1.01
  -3 -10   1    7.88    1.11
  -3 -10   1    7.14    0.85
  -3 -10   1    8.05    1.04
  -3 -10   1    6.49    0.86
   2  10  -1    0.65    0.68
  -2 -10   1   -0.31    0.63
  -2 -10   1   -0.22    0.48
  -2 -10   1   -0.03    0.51
  -2 -10   1    0.06    0.62
  -2 -10   1    0.13    0.60
  -1 -10   1    6.92    1.02
  -1 -10   1    7.48    0.84
  -1 -10   1    6.60    1.14
  -1 -10   1    6.89    1.03
   0 -10   1   -0.11    0.76
   0 -10   1    0.11    0.45
   0 -10   1    1.38    0.74
   0 -10   1    2.77    0.87
   1 -10   1   16.58    1.51
   1 -10   1   13.78    1.50
   1 -10   1   17.05    1.70
   1 -10   1   16.57    1.06
   2 -10   1   18.26    1.09
   2 -10   1   20.19    1.84
   2 -10   1   20.81    1.53
   2 -10   1   21.01    1.84
   3 -10   1    5.80    0.64
   3 -10   1    4.41    1.19
   3 -10   1    7.08    1.25
   4 -10   1   12.79    0.74
   4 -10   1   12.05    1.67
   4 -10   1   14.51    1.69
   4 -10   1   13.63    1.63
  13   9  -1    1.57    0.81
  13   9  -1    1.43    0.83
  13   9  -1    0.38    0.96
 -13  -9   1    0.15    0.86
 -13  -9   1    1.58    1.05
  12   9  -1   10.75    1.50
  12   9  -1    8.01    1.19
 -12  -9   1    7.72    1.27
 -12  -9   1    8.47    1.39
 -12  -9   1    8.73    1.10
  11   9  -1    3.31    0.87
  11   9  -1    2.46    1.00
 -11  -9   1    1.80    0.81
 -11  -9   1    4.29    0.85
 -11  -9   1    5.65    1.14
  10   9  -1   23.17    1.93
  10   9  -1   17.76    1.51
 -10  -9   1   24.58    1.54
 -10  -9   1   22.25    1.55
 -10  -9   1   22.67    1.72
   9   9  -1   35.61    2.06
   9   9  -1   43.29    1.87
   9   9  -1   43.58    2.05
  -9  -9   1   41.52    1.96
  -9  -9   1   43.71    1.96
  -9  -9   1   40.95    2.15
  -9  -9   1   39.83    1.93
   8   9  -1    6.60    0.90
   8   9  -1    7.50    0.96
   8   9  -1    6.34    1.05
  -8  -9   1    7.08    1.08
  -8  -9   1    7.07    0.98
  -8  -9   1    8.35    1.01
  -8  -9   1    5.68    0.89
  -8  -9   1    7.78    0.93
   7   9  -1   17.85    1.28
   7   9  -1   19.47    1.45
   7   9  -1   19.18    1.30
  -7  -9   1   18.91    1.43
  -7  -9   1   19.08    1.08
  -7  -9   1   18.93    1.23
  -7  -9   1   18.92    1.30
  -7  -9   1   18.39    1.23
  -7  -9   1   18.27    1.25
   6   9  -1    2.44    0.62
   6   9  -1    1.76    0.63
   6   9  -1    2.51    0.81
  -6  -9   1    2.28    0.73
  -6  -9   1    3.37    0.81
  -6  -9   1    2.52    0.66
  -6  -9   1    2.62    0.69
  -6  -9   1    3.17    0.66
  -6  -9   1    2.64    0.59
   5   9  -1    1.64    0.68
   5   9  -1    0.59    0.47
  -5  -9   1    0.76    0.50
  -5  -9   1    0.83    0.54
  -5  -9   1    0.35    0.52
  -5  -9   1    0.52    0.45
  -5  -9   1    0.49    0.57
  -5  -9   1   -0.23    0.44
   4   9  -1   19.85    1.13
   4   9  -1   20.49    1.40
  -4  -9   1   20.04    1.10
  -4  -9   1   19.98    1.25
  -4  -9   1   19.59    1.22
  -4  -9   1   21.43    1.29
  -4  -9   1   19.65    1.38
  -4  -9   1   22.92    1.43
   3   9  -1   48.85    2.15
   3   9  -1   49.60    1.73
  -3  -9   1   51.11    1.93
  -3  -9   1   46.50    2.10
  -3  -9   1   48.83    2.00
  -3  -9   1   45.33    2.03
  -3  -9   1   46.80    1.87
  -3  -9   1   49.14    1.73
   2   9  -1    2.15    0.41
   2   9  -1    2.73    0.77
  -2  -9   1    2.60    0.70
  -2  -9   1    2.03    0.56
  -2  -9   1    2.51    0.68
  -2  -9   1    1.81    0.71
  -2  -9   1    2.77    0.58
  -1  -9   1   37.87    1.52
  -1  -9   1   33.20    1.75
  -1  -9   1   35.02    1.51
  -1  -9   1   33.34    1.82
  -1  -9   1   32.60    1.75
   0  -9   1    8.92    1.14
   0  -9   1    8.52    0.80
   0  -9   1    6.96    1.02
   0  -9   1    7.11    1.00
   1  -9   1    1.10    0.46
   1  -9   1    0.89    0.77
   1  -9   1    0.84    0.69
   1  -9   1    3.59    0.79
   2  -9   1    5.83    1.06
   2  -9   1    2.88    0.91
   2  -9   1    4.93    0.92
   2  -9   1    4.49    0.59
   3  -9   1    0.13    0.69
   3  -9   1    0.50    0.84
   3  -9   1    1.03    0.39
   3  -9   1   -0.14    0.73
   4  -9   1    5.74    1.17
   4  -9   1    4.66    0.48
   4  -9   1    4.76    1.10
   4  -9   1    6.25    1.20
   5  -9   1    9.37    1.44
   5  -9   1    8.53    1.42
   5  -9   1   11.10    1.52
  13   8  -1    1.78    0.79
  13   8  -1    2.20    0.84
  13   8  -1    1.92    0.92
  13   8  -1    1.56    1.02
 -13  -8   1    2.55    1.09
 -13  -8   1    3.60    1.09
  12   8  -1   10.33    1.42
  12   8  -1    8.29    1.25
  12   8  -1   11.02    1.28
  12   8  -1    7.76    1.16
 -12  -8   1    8.26    1.25
 -12  -8   1    9.08    1.39
  11   8  -1    4.47    1.07
  11   8  -1    7.06    1.06
  11   8  -1    7.01    1.06
  11   8  -1    7.85    1.11
 -11  -8   1    7.08    1.26
 -11  -8   1    5.59    1.04
 -11  -8   1    6.99    0.95
  10   8  -1    0.22    0.52
  10   8  -1   -0.06    0.52
  10   8  -1   -0.75    0.64
  10   8  -1    0.51    0.60
 -10  -8   1   -0.99    0.51
 -10  -8   1   -0.25    0.69
 -10  -8   1    0.97    0.63
   9   8  -1    4.36    0.82
   9   8  -1    3.00    0.69
   9   8  -1    5.37    0.88
   9   8  -1    4.01    0.74
   9   8  -1    5.50    1.01
  -9  -8   1    4.59    0.83
  -9  -8   1    4.00    0.76
  -9  -8   1    2.36    0.80
  -9  -8   1    4.05    0.75
   8   8  -1   19.43    1.19
   8   8  -1   15.92    1.07
   8   8  -1   16.35    1.42
   8   8  -1   17.00    1.23
   8   8  -1   17.80    1.24
  -8  -8   1   20.33    1.27
  -8  -8   1   20.56    1.30
  -8  -8   1   18.07    1.53
  -8  -8   1   16.81    1.26
  -8  -8   1   17.48    1.20
   7   8  -1    1.65    0.44
   7   8  -1    0.96    0.52
   7   8  -1    0.76    0.52
   7   8  -1    0.84    0.57
   7   8  -1    1.94    0.55
  -7  -8   1    2.18    0.60
  -7  -8   1    1.43    0.68
  -7  -8   1    1.59    0.42
  -7  -8   1    1.81    0.56
  -7  -8   1    2.15    0.63
  -7  -8   1    1.75    0.62
   6   8  -1   61.38    2.30
   6   8  -1   54.14    2.05
   6   8  -1   57.44    2.13
   6   8  -1   55.67    2.33
   6   8  -1   52.40    1.69
  -6  -8   1   54.52    2.23
  -6  -8   1   58.71    2.20
  -6  -8   1   56.76    2.06
  -6  -8   1   57.60    2.12
  -6  -8   1   56.96    2.14
  -6  -8   1   59.32    1.92
   5   8  -1   21.24    1.30
   5   8  -1   22.02    1.21
   5   8  -1   23.68    1.28
  -5  -8   1   24.66    1.40
  -5  -8   1   26.84    1.34
  -5  -8   1   25.14    1.33
  -5  -8   1   23.35    1.37
  -5  -8   1   22.92    1.18
  -5  -8   1   22.18    1.15
   4   8  -1    6.01    0.82
   4   8  -1    6.33    0.70
  -4  -8   1    6.60    0.86
  -4  -8   1    5.25    0.82
  -4  -8   1    6.58    0.76
  -4  -8   1    6.34    0.69
  -4  -8   1    6.14    0.73
  -4  -8   1    6.67    0.78
   3   8  -1    7.74    0.92
   3   8  -1    9.76    0.77
  -3  -8   1    8.63    0.82
  -3  -8   1    8.65    0.87
  -3  -8   1   11.16    1.08
  -3  -8   1    9.07    0.84
  -3  -8   1    7.27    0.92
  -3  -8   1    8.73    0.74
   2   8  -1   -0.16    0.29
   2   8  -1    0.42    0.52
  -2  -8   1    0.23    0.49
  -2  -8   1   -0.22    0.41
  -2  -8   1    0.49    0.49
  -2  -8   1   -0.42    0.36
  -2  -8   1    0.43    0.40
  -2  -8   1    0.05    0.34
   1   8  -1    2.68    0.35
  -1  -8   1    2.21    0.48
  -1  -8   1    3.03    0.72
  -1  -8   1    2.58    0.53
  -1  -8   1    2.55    0.69
  -1  -8   1    2.20    0.49
  -1  -8   1    2.55    0.66
   0  -8   1    3.41    0.53
   0  -8   1    1.82    0.46
   0  -8   1    2.71    0.67
   0  -8   1    2.86    0.74
   0  -8   1    2.68    0.69
   1  -8   1    0.37    0.54
   1  -8   1    0.56    0.38
   1  -8   1    0.95    0.61
   1  -8   1    1.59    0.70
   2  -8   1   42.13    1.49
   2  -8   1   44.25    1.96
   2  -8   1   44.99    2.12
   2  -8   1   44.50    2.13
   3  -8   1   35.47    2.02
   3  -8   1   36.99    1.97
   3  -8   1   36.08    1.28
   3  -8   1   41.01    1.91
   4  -8   1    0.77    0.31
   4  -8   1    2.05    0.82
   4  -8   1    1.49    0.76
   4  -8   1   -1.10    0.64
  -5   8  -1    3.68    1.01
   5  -8   1    4.22    0.99
   5  -8   1    3.28    0.88
   5  -8   1    4.85    1.09
   5  -8   1    3.95    1.05
   6  -8   1   -1.12    0.67
   6  -8   1    0.08    0.73
  13   7  -1    1.85    0.98
  13   7  -1    1.20    0.92
  13   7  -1    0.44    0.68
  13   7  -1    0.30    0.69
 -13  -7   1    1.41    0.91
 -13  -7   1    0.10    0.85
  12   7  -1    1.93    0.96
  12   7  -1   -0.61    0.56
  12   7  -1    0.95    0.81
  12   7  -1    0.14    0.63
 -12  -7   1   -0.08    0.77
 -12  -7   1   -1.59    0.62
  11   7  -1   24.28    1.78
  11   7  -1   23.67    1.61
  11   7  -1   26.50    1.67
  11   7  -1   27.24    1.66
 -11  -7   1   28.41    1.81
 -11  -7   1   24.43    1.42
 -11  -7   1   26.79    1.83
  10   7  -1   21.21    1.59
  10   7  -1   21.38    1.45
  10   7  -1   20.69    1.44
  10   7  -1   18.72    1.39
 -10  -7   1   21.25    1.32
 -10  -7   1   19.13    1.47
 -10  -7   1   20.95    1.56
   9   7  -1    7.15    0.92
   9   7  -1    7.33    0.91
   9   7  -1    7.91    0.86
   9   7  -1    6.01    0.86
   9   7  -1    4.83    0.90
  -9  -7   1    6.36    0.94
  -9  -7   1    6.34    1.00
  -9  -7   1    7.31    0.87
   8   7  -1   18.81    1.14
   8   7  -1   18.82    1.26
   8   7  -1   18.16    1.09
   8   7  -1   16.43    1.29
   8   7  -1   19.52    1.38
  -8  -7   1   19.33    1.37
  -8  -7   1   18.45    1.23
  -8  -7   1   17.90    1.11
  -8  -7   1   18.94    1.30
  -8  -7   1   19.90    1.19
   7   7  -1    1.02    0.48
   7   7  -1    0.98    0.42
   7   7  -1    0.60    0.60
   7   7  -1    0.79    0.45
   7   7  -1    1.20    0.48
  -7  -7   1    0.86    0.47
  -7  -7   1    0.69    0.57
  -7  -7   1    0.46    0.45
  -7  -7   1    1.22    0.49
  -7  -7   1    1.10    0.54
   6   7  -1   -0.41    0.44
   6   7  -1   -0.43    0.37
   6   7  -1   -0.21    0.38
   6   7  -1   -0.27    0.29
   6   7  -1    0.11    0.39
  -6  -7   1    0.11    0.43
  -6  -7   1   -0.16    0.38
  -6  -7   1    0.46    0.51
  -6  -7   1   -0.16    0.29
  -6  -7   1    0.16    0.41
  -6  -7   1    0.05    0.39
  -6  -7   1    0.19    0.41
   5   7  -1   10.00    0.86
   5   7  -1   10.66    0.95
   5   7  -1   10.25    0.58
   5   7  -1    9.72    0.82
   5   7  -1    9.68    0.83
  -5  -7   1   11.46    0.96
  -5  -7   1    9.68    0.93
  -5  -7   1    9.90    0.88
  -5  -7   1   11.01    0.83
  -5  -7   1    8.99    0.86
  -5  -7   1   10.62    0.75
   4   7  -1   -0.19    0.33
   4   7  -1   -0.09    0.41
   4   7  -1    0.03    0.16
   4   7  -1   -0.26    0.34
   4   7  -1    0.52    0.34
  -4  -7   1    0.24    0.35
  -4  -7   1    0.53    0.45
  -4  -7   1    0.79    0.40
  -4  -7   1    0.07    0.44
  -4  -7   1    0.06    0.39
   3   7  -1   60.88    2.12
   3   7  -1   58.48    1.86
   3   7  -1   58.75    1.88
  -3  -7   1   57.53    1.95
  -3  -7   1   55.83    2.03
  -3  -7   1   57.81    1.81
  -3  -7   1   53.08    1.90
  -3  -7   1   57.21    2.09
   2   7  -1   51.16    1.97
   2   7  -1   51.29    1.66
  -2  -7   1   52.46    1.76
  -2  -7   1   49.65    1.96
  -2  -7   1   55.00    1.95
  -2  -7   1   52.54    1.66
  -2  -7   1   53.18    1.79
   1   7  -1    1.40    0.30
   1   7  -1    1.77    0.59
  -1  -7   1    0.69    0.47
  -1  -7   1    1.33    0.38
  -1  -7   1    0.97    0.39
  -1  -7   1    1.40    0.55
  -1  -7   1    1.05    0.39
   0  -7   1   51.93    1.69
   0  -7   1   48.68    1.95
   0  -7   1   50.21    1.64
   0  -7   1   52.71    1.68
   0  -7   1   50.85    2.04
   0  -7   1   53.69    1.95
   0  -7   1   48.26    1.68
   1  -7   1   14.32    0.79
   1  -7   1   15.98    1.21
   1  -7   1   15.03    1.14
   1  -7   1   15.08    0.92
   1  -7   1   16.68    1.08
   1  -7   1   14.60    0.81
   2  -7   1    0.52    0.32
   2  -7   1    0.92    0.34
   2  -7   1    1.09    0.59
   2  -7   1    0.80    0.48
   2  -7   1    0.90    0.62
   2  -7   1    1.55    0.60
  -3   7  -1    7.91    0.98
   3  -7   1    8.09    1.05
   3  -7   1    7.17    1.05
   3  -7   1    7.75    0.56
   3  -7   1    6.74    0.91
   3  -7   1    7.79    0.56
  -4   7  -1    5.36    0.91
   4  -7   1    5.70    0.88
   4  -7   1    5.34    0.42
   4  -7   1    5.70    0.97
   4  -7   1    6.88    1.06
   4  -7   1    5.38    0.42
  -5   7  -1    5.15    0.96
   5  -7   1    5.70    1.02
   5  -7   1    6.74    0.95
   5  -7   1    6.16    1.03
   5  -7   1    5.15    1.03
   5  -7   1    4.76    0.94
  -6   7  -1   23.83    1.75
   6  -7   1   23.38    1.71
   6  -7   1   26.50    1.75
   6  -7   1   21.55    1.71
   6  -7   1   21.76    1.68
  -7   7  -1    1.46    0.92
   7  -7   1    1.42    0.87
  13   6  -1    9.78    1.51
  13   6  -1   13.14    1.38
  13   6  -1   10.89    1.49
 -13  -6   1   14.02    1.66
  12   6  -1    2.07    0.72
  12   6  -1    3.04    1.00
  12   6  -1    3.84    0.98
  12   6  -1    3.21    0.81
 -12  -6   1    2.45    0.95
 -12  -6   1    3.54    1.04
  11   6  -1    0.59    0.76
  11   6  -1    0.40    0.57
  11   6  -1    0.28    0.66
  11   6  -1    0.19    0.56
 -11  -6   1    0.67    0.73
 -11  -6   1    1.69    0.80
  10   6  -1   -0.82    0.48
  10   6  -1    0.54    0.62
  10   6  -1   -0.88    0.45
  10   6  -1    0.24    0.54
 -10  -6   1    0.35    0.44
 -10  -6   1   -0.34    0.57
 -10  -6   1   -0.60    0.59
   9   6  -1    0.80    0.58
   9   6  -1    0.17    0.50
   9   6  -1    0.26    0.51
   9   6  -1    0.92    0.46
   9   6  -1   -0.15    0.45
  -9  -6   1    1.10    0.69
  -9  -6   1    0.36    0.45
  -9  -6   1    0.40    0.58
   8   6  -1   17.16    1.15
   8   6  -1   19.37    1.18
   8   6  -1   17.75    1.22
   8   6  -1   18.43    1.22
   8   6  -1   18.54    1.05
  -8  -6   1   19.26    1.07
  -8  -6   1   18.03    1.29
  -8  -6   1   17.54    1.20
  -8  -6   1   20.16    1.16
   7   6  -1   72.84    2.44
   7   6  -1   74.61    2.39
   7   6  -1   72.35    2.31
   7   6  -1   72.26    2.58
   7   6  -1   79.46    2.52
  -7  -6   1   74.35    2.46
  -7  -6   1   76.05    2.56
  -7  -6   1   72.75    2.34
  -7  -6   1   73.61    2.59
  -7  -6   1   74.18    2.41
   6   6  -1    1.17    0.40
   6   6  -1    1.13    0.45
   6   6  -1    0.23    0.41
   6   6  -1    0.73    0.41
   6   6  -1    1.57    0.44
  -6  -6   1    1.12    0.43
  -6  -6   1    1.10    0.43
  -6  -6   1    1.47    0.45
  -6  -6   1    1.25    0.48
  -6  -6   1    1.54    0.56
  -6  -6   1    1.12    0.30
  -6  -6   1    1.38    0.44
   5   6  -1   68.47    2.13
   5   6  -1   65.89    1.93
   5   6  -1   68.76    2.19
   5   6  -1   66.00    2.17
   5   6  -1   65.29    2.24
  -5  -6   1   66.86    1.94
  -5  -6   1   66.07    2.15
  -5  -6   1   67.72    2.19
  -5  -6   1   69.40    2.20
  -5  -6   1   67.13    2.27
  -5  -6   1   68.68    2.17
   4   6  -1   47.39    1.39
   4   6  -1   48.94    1.80
   4   6  -1   49.60    1.72
   4   6  -1   49.99    1.72
   4   6  -1   48.12    1.68
  -4  -6   1   48.64    1.70
  -4  -6   1   50.65    1.75
  -4  -6   1   49.61    1.82
  -4  -6   1   50.00    1.76
  -4  -6   1   53.64    1.69
   3   6  -1    2.22    0.43
   3   6  -1    3.32    0.51
   3   6  -1    2.79    0.50
   3   6  -1    2.58    0.45
  -3  -6   1    2.24    0.47
  -3  -6   1    3.94    0.54
  -3  -6   1    2.78    0.43
  -3  -6   1    1.78    0.47
  -3  -6   1    2.38    0.53
   2   6  -1    0.81    0.42
   2   6  -1    0.87    0.33
  -2  -6   1    1.11    0.39
  -2  -6   1    0.43    0.29
  -2  -6   1    0.31    0.41
  -2  -6   1    0.50    0.33
  -2  -6   1    0.10    0.41
   1   6  -1   25.00    1.26
   1   6  -1   22.50    0.87
  -1  -6   1   23.96    1.16
  -1  -6   1   23.88    0.99
  -1  -6   1   24.38    0.96
  -1  -6   1   23.17    1.21
  -1  -6   1   24.27    0.99
  -1  -6   1   22.27    1.01
   0  -6   1    4.44    0.34
   0  -6   1    6.71    0.56
   0  -6   1    6.51    0.54
   0  -6   1    6.80    0.71
   0  -6   1    6.43    0.58
   0  -6   1    6.05    0.53
   0  -6   1    6.05    0.79
   1  -6   1   92.36    2.44
   1  -6   1   95.42    2.82
   1  -6   1   96.25    2.93
   1  -6   1   94.28    2.46
   1  -6   1   92.28    2.67
   1  -6   1   93.68    2.48
   1  -6   1   91.73    2.95
   1  -6   1   90.07    2.48
  -2   6  -1   19.12    1.17
   2  -6   1   21.00    1.16
   2  -6   1   20.25    0.94
   2  -6   1   19.38    0.80
   2  -6   1   19.97    1.24
   2  -6   1   22.42    1.16
   2  -6   1   20.45    1.26
   2  -6   1   20.54    0.81
  -3   6  -1   29.21    1.48
   3  -6   1   26.87    0.92
   3  -6   1   29.17    1.52
   3  -6   1   27.10    0.93
   3  -6   1   25.86    1.23
   3  -6   1   26.72    1.51
   3  -6   1   28.46    1.39
   3  -6   1   30.60    1.44
  -4   6  -1   25.25    1.51
   4  -6   1   25.11    1.39
   4  -6   1   22.22    0.75
   4  -6   1   24.05    1.45
   4  -6   1   25.79    1.29
   4  -6   1   23.14    1.49
   4  -6   1   26.06    1.43
  -5   6  -1    0.46    0.63
   5  -6   1    1.33    0.63
   5  -6   1    0.15    0.59
   5  -6   1    0.52    0.59
   5  -6   1    0.79    0.52
   5  -6   1    0.67    0.57
   5  -6   1    0.61    0.60
   5  -6   1    0.62    0.64
  -6   6  -1    0.67    0.70
   6  -6   1    0.16    0.62
   6  -6   1    1.06    0.67
   6  -6   1    0.37    0.56
   6  -6   1    1.05    0.68
  -7   6  -1    0.07    0.74
   7  -6   1    1.54    0.75
   7  -6   1    0.67    0.68
  -8   6  -1    3.37    1.07
  13   5  -1    2.53    1.06
  13   5  -1    1.83    0.96
  13   5  -1    2.10    0.74
 -13  -5   1    1.46    1.02
  12   5  -1   13.29    1.54
  12   5  -1   12.78    1.27
  12   5  -1   15.61    1.60
 -12  -5   1   12.34    1.54
  11   5  -1   -0.09    0.54
  11   5  -1   -0.22    0.55
  11   5  -1    0.94    0.70
  11   5  -1    0.02    0.67
 -11  -5   1    1.00    0.75
 -11  -5   1   -0.75    0.64
  10   5  -1   36.49    1.73
  10   5  -1   33.74    1.88
  10   5  -1   35.14    1.69
  10   5  -1   35.71    1.87
 -10  -5   1   35.66    1.89
 -10  -5   1   30.61    1.82
 -10  -5   1   32.59    1.52
   9   5  -1   28.04    1.62
   9   5  -1   24.62    1.54
   9   5  -1   26.16    1.58
   9   5  -1   24.72    1.40
   9   5  -1   27.93    1.46
  -9  -5   1   27.66    1.54
  -9  -5   1   29.43    1.63
  -9  -5   1   30.03    1.31
   8   5  -1   -0.17    0.53
   8   5  -1    1.12    0.49
   8   5  -1    0.28    0.41
   8   5  -1    0.59    0.37
  -8  -5   1    0.10    0.38
  -8  -5   1    0.76    0.52
  -8  -5   1    0.42    0.52
  -8  -5   1    0.10    0.36
   7   5  -1   16.86    1.05
   7   5  -1   18.00    1.16
   7   5  -1   19.01    0.96
   7   5  -1   16.62    1.02
  -7  -5   1   17.93    0.94
  -7  -5   1   16.25    1.08
  -7  -5   1   16.62    0.99
  -7  -5   1   18.77    1.12
   6   5  -1    4.32    0.66
   6   5  -1    3.49    0.58
   6   5  -1    2.57    0.51
   6   5  -1    4.10    0.53
  -6  -5   1    3.44    0.29
  -6  -5   1    3.78    0.62
  -6  -5   1    4.12    0.56
  -6  -5   1    4.13    0.66
  -6  -5   1    3.42    0.53
  -6  -5   1    3.36    0.55
  -6  -5   1    3.47    0.52
   5   5  -1   12.65    0.76
   5   5  -1   12.38    0.82
   5   5  -1   11.50    0.88
   5   5  -1   11.86    0.83
  -5  -5   1   12.54    0.80
  -5  -5   1   13.56    0.81
  -5  -5   1   13.03    0.85
  -5  -5   1   13.33    0.85
  -5  -5   1   13.65    0.85
  -5  -5   1   13.87    0.61
  -5  -5   1   12.46    0.91
   4   5  -1   91.18    2.61
   4   5  -1   89.03    2.39
   4   5  -1   88.17    2.59
   4   5  -1   92.87    2.58
   4   5  -1   89.77    2.67
  -4  -5   1   94.85    2.63
  -4  -5   1   94.66    2.63
  -4  -5   1   90.50    2.68
  -4  -5   1   93.43    2.59
  -4  -5   1   92.74    2.61
   3   5  -1    6.12    0.37
   3   5  -1    6.86    0.60
   3   5  -1    6.25    0.64
   3   5  -1    6.66    0.61
   3   5  -1    6.31    0.56
  -3  -5   1    6.41    0.58
  -3  -5   1    6.11    0.63
  -3  -5   1    6.94    0.57
  -3  -5   1    7.09    0.70
  -3  -5   1    6.22    0.58
   2   5  -1   92.58    2.44
   2   5  -1   94.50    2.64
  -2  -5   1   89.76    2.40
  -2  -5   1   89.58    2.49
  -2  -5   1   88.80    2.57
  -2  -5   1   91.23    2.48
  -2  -5   1   84.76    2.59
   1   5  -1  124.82    3.51
   1   5  -1  127.65    3.19
  -1  -5   1  127.53    3.28
  -1  -5   1  126.66    3.51
  -1  -5   1  128.97    3.30
  -1  -5   1  132.07    3.27
  -1  -5   1  127.36    3.43
  -1  -5   1  131.18    3.24
   0   5  -1    1.05    0.18
   0  -5   1    1.10    0.32
   0  -5   1    0.77    0.27
   0  -5   1    0.96    0.29
   0  -5   1    1.29    0.45
   0  -5   1    0.31    0.36
   0  -5   1    0.50    0.26
   1  -5   1   26.11    1.27
   1  -5   1   27.84    0.94
   1  -5   1   27.52    0.94
   1  -5   1   27.95    0.92
   1  -5   1   28.31    0.95
   1  -5   1   28.44    1.14
   1  -5   1   26.87    1.19
  -2   5  -1    7.35    0.73
   2  -5   1    7.79    0.62
   2  -5   1    6.26    0.40
   2  -5   1    7.22    0.80
   2  -5   1    7.51    0.73
   2  -5   1    7.62    0.69
   2  -5   1    6.83    0.44
   2  -5   1    7.26    0.44
   2  -5   1    6.53    0.74
  -3   5  -1    1.45    0.49
   3  -5   1    0.66    0.20
   3  -5   1    0.46    0.45
   3  -5   1    1.63    0.46
   3  -5   1    0.13    0.43
   3  -5   1    0.89    0.44
   3  -5   1    1.32    0.42
   3  -5   1    1.03    0.22
  -4   5  -1   53.96    2.09
   4  -5   1   53.55    2.06
   4  -5   1   55.18    2.01
   4  -5   1   53.68    2.01
   4  -5   1   52.47    1.91
   4  -5   1   52.02    2.04
  -5   5  -1   11.49    1.15
   5  -5   1   11.81    1.16
   5  -5   1   14.46    1.24
   5  -5   1   12.67    1.08
   5  -5   1   14.19    1.10
   5  -5   1   11.20    1.06
   5  -5   1   12.33    1.14
   5  -5   1   11.67    1.06
  -6   5  -1   12.75    1.29
   6  -5   1   12.05    1.18
   6  -5   1   13.69    1.25
   6  -5   1   12.64    1.19
   6  -5   1   12.98    1.25
   6  -5   1   12.70    1.17
   6  -5   1   12.56    1.18
   6  -5   1   14.69    1.32
  -7   5  -1   25.42    1.77
   7  -5   1   30.03    1.68
   7  -5   1   30.28    1.74
   7  -5   1   28.91    1.71
   7  -5   1   27.67    1.71
   7  -5   1   28.39    1.71
  -8   5  -1    4.56    1.11
   8  -5   1    4.78    1.00
   8  -5   1    4.49    0.99
  -9   5  -1    3.12    1.03
   9  -5   1    2.60    0.97
  13   4  -1    2.04    1.08
  13   4  -1    0.67    0.62
  13   4  -1    1.54    0.91
 -13  -4   1    0.42    0.92
  12   4  -1   15.50    1.63
  12   4  -1   16.42    1.76
  12   4  -1   17.97    1.35
 -12  -4   1   16.45    1.72
  11   4  -1    1.88    0.87
  11   4  -1    1.55    0.80
  11   4  -1    1.61    0.62
 -11  -4   1    1.81    0.80
  10   4  -1    1.80    0.77
  10   4  -1    3.65    0.85
  10   4  -1    2.62    0.63
  10   4  -1    2.82    0.65
 -10  -4   1    2.08    0.75
 -10  -4   1    1.55    0.71
   9   4  -1    2.31    0.56
   9   4  -1    3.68    0.65
   9   4  -1    2.63    0.68
  -9  -4   1    3.48    0.50
  -9  -4   1    4.05    0.83
  -9  -4   1    4.43    0.85
   8   4  -1    2.73    0.55
   8   4  -1    4.21    0.56
   8   4  -1    3.65    0.60
   8   4  -1    3.14    0.67
  -8  -4   1    2.70    0.71
  -8  -4   1    2.71    0.69
  -8  -4   1    4.08    0.55
  -8  -4   1    3.34    0.51
   7   4  -1   26.86    1.36
   7   4  -1   25.63    1.23
   7   4  -1   27.65    1.25
   7   4  -1   26.76    1.12
  -7  -4   1   26.64    1.35
  -7  -4   1   26.67    1.11
  -7  -4   1   26.47    1.15
  -7  -4   1   27.28    1.31
   6   4  -1   73.58    2.16
   6   4  -1   73.72    2.30
   6   4  -1   71.21    2.27
   6   4  -1   73.41    2.41
  -6  -4   1   78.95    2.28
  -6  -4   1   80.19    2.25
  -6  -4   1   75.56    2.42
  -6  -4   1   74.13    2.37
  -6  -4   1   75.58    2.19
   5   4  -1   15.71    0.86
   5   4  -1   15.76    0.80
   5   4  -1   14.29    0.86
   5   4  -1   15.67    0.90
  -5  -4   1   16.84    0.94
  -5  -4   1   15.65    0.54
  -5  -4   1   16.67    0.96
  -5  -4   1   17.25    0.89
  -5  -4   1   16.81    0.87
  -5  -4   1   14.31    0.84
  -5  -4   1   17.36    0.84
   4   4  -1   42.94    1.40
   4   4  -1   44.47    1.48
   4   4  -1   46.58    1.49
   4   4  -1   44.43    1.55
  -4  -4   1   42.32    1.52
  -4  -4   1   43.64    1.48
  -4  -4   1   45.70    1.46
  -4  -4   1   42.48    1.43
  -4  -4   1   45.87    1.47
  -4  -4   1   43.01    1.23
  -4  -4   1   42.05    1.46
   3   4  -1   60.41    1.72
   3   4  -1   59.57    1.81
   3   4  -1   54.94    1.70
  -3  -4   1   57.11    1.74
  -3  -4   1   55.93    1.77
  -3  -4   1   58.02    1.70
  -3  -4   1   57.82    1.75
  -3  -4   1   55.06    1.71
   2   4  -1    0.96    0.30
   2   4  -1    1.28    0.16
   2   4  -1    2.03    0.40
   2   4  -1    1.09    0.35
   2   4  -1    1.08    0.30
  -2  -4   1    1.10    0.30
  -2  -4   1    1.65    0.37
  -2  -4   1    1.32    0.40
  -2  -4   1    1.80    0.43
  -2  -4   1    1.19    0.32
   1   4  -1   15.43    0.82
   1   4  -1   14.51    0.62
  -1  -4   1   15.15    0.63
  -1  -4   1   14.21    0.79
  -1  -4   1   14.42    0.67
  -1  -4   1   13.70    0.68
  -1  -4   1   14.05    0.75
  -1  -4   1   13.76    0.67
   0   4  -1   10.19    0.43
   0   4  -1   10.36    0.78
   0  -4   1    9.95    0.56
   0  -4   1   10.21    0.52
   0  -4   1   11.60    0.75
   0  -4   1   10.61    0.53
   0  -4   1   10.86    0.55
   0  -4   1   10.23    0.41
   0  -4   1   10.01    0.65
  -1   4  -1   16.09    0.82
   1  -4   1   13.24    0.74
   1  -4   1   14.54    0.86
   1  -4   1   14.94    0.59
   1  -4   1   15.12    0.79
   1  -4   1   14.82    0.59
   1  -4   1   14.64    0.57
  -2   4  -1  165.84    4.16
   2  -4   1  157.92    4.08
   2  -4   1  160.43    3.72
   2  -4   1  158.38    3.69
   2  -4   1  156.03    4.20
   2  -4   1  154.02    4.10
   2  -4   1  156.78    3.72
  -3   4  -1    3.79    0.58
   3  -4   1    3.60    0.25
   3  -4   1    4.03    0.54
   3  -4   1    3.19    0.55
   3  -4   1    3.25    0.24
   3  -4   1    3.72    0.53
   3  -4   1    3.54    0.55
  -4   4  -1   19.77    1.13
   4  -4   1   21.45    1.09
   4  -4   1   18.53    1.08
   4  -4   1   19.40    1.10
   4  -4   1   18.26    1.11
   4  -4   1   16.67    1.06
  -5   4  -1    6.00    0.83
   5  -4   1    6.15    0.77
   5  -4   1    8.43    0.86
   5  -4   1    6.47    0.81
   5  -4   1    7.65    0.81
   5  -4   1    6.20    0.79
   5  -4   1    5.82    0.80
  -6   4  -1    1.08    0.65
   6  -4   1    1.49    0.54
   6  -4   1    0.46    0.51
   6  -4   1    1.15    0.58
   6  -4   1    2.03    0.59
   6  -4   1    0.89    0.56
   6  -4   1    0.70    0.53
   6  -4   1    1.80    0.58
  -7   4  -1    1.60    0.72
   7  -4   1    1.07    0.62
   7  -4   1    1.76    0.70
   7  -4   1    2.48    0.62
   7  -4   1    1.95    0.69
   7  -4   1    2.02    0.71
   7  -4   1    1.29    0.62
  -8   4  -1    5.96    1.08
   8  -4   1    5.38    1.00
   8  -4   1    4.57    0.97
   8  -4   1    5.50    1.03
  -9   4  -1    1.18    0.87
   9  -4   1    1.22    0.84
   9  -4   1    2.36    0.94
   9  -4   1    2.38    0.89
 -10   4  -1   17.70    1.84
  10  -4   1   14.28    1.72
  13   3  -1   -1.17    0.78
  13   3  -1    0.60    0.96
  13   3  -1    0.47    0.56
 -13  -3   1    0.17    0.77
  12   3  -1    5.75    1.20
  12   3  -1    3.66    1.07
  12   3  -1    5.56    0.88
 -12  -3   1    4.50    1.10
  11   3  -1   17.21    1.65
  11   3  -1   17.50    1.24
  11   3  -1   21.43    1.62
 -11  -3   1   17.38    1.67
  10   3  -1    1.39    0.74
  10   3  -1    1.32    0.51
  10   3  -1    0.64    0.67
 -10  -3   1    0.06    0.56
   9   3  -1   26.43    1.55
   9   3  -1   27.02    1.33
   9   3  -1   27.20    1.33
  -9  -3   1   24.24    1.55
   8   3  -1   31.31    1.36
   8   3  -1   33.94    1.30
   8   3  -1   30.27    1.51
   8   3  -1   30.20    1.37
  -8  -3   1   32.30    1.14
  -8  -3   1   30.59    1.54
  -8  -3   1   32.40    1.61
   7   3  -1    1.82    0.41
   7   3  -1    2.73    0.45
   7   3  -1    1.91    0.57
   7   3  -1    2.21    0.45
  -7  -3   1    2.48    0.53
  -7  -3   1    2.68    0.43
  -7  -3   1    2.51    0.57
  -7  -3   1    2.73    0.40
   6   3  -1    0.19    0.29
   6   3  -1    0.00    0.33
   6   3  -1    0.24    0.31
   6   3  -1   -0.02    0.26
   6   3  -1   -0.06    0.27
  -6  -3   1   -0.04    0.37
  -6  -3   1    0.23    0.29
  -6  -3   1   -0.26    0.25
  -6  -3   1   -0.51    0.36
   5   3  -1    0.57    0.31
   5   3  -1    1.41    0.42
   5   3  -1    0.74    0.34
   5   3  -1    1.28    0.32
  -5  -3   1    0.84    0.31
  -5  -3   1    1.05    0.41
  -5  -3   1    1.09    0.39
  -5  -3   1    1.26    0.33
   4   3  -1    6.91    0.64
   4   3  -1    7.02    0.57
   4   3  -1    5.93    0.53
   4   3  -1    6.10    0.48
  -4  -3   1    6.02    0.52
  -4  -3   1    5.94    0.52
  -4  -3   1    7.06    0.55
  -4  -3   1    6.41    0.59
  -4  -3   1    7.59    0.65
  -4  -3   1    6.92    0.58
  -4  -3   1    6.66    0.29
   3   3  -1  175.10    4.21
   3   3  -1  167.52    4.20
   3   3  -1  172.11    4.27
   3   3  -1  165.91    4.14
  -3  -3   1  171.26    4.22
  -3  -3   1  173.12    4.19
  -3  -3   1  169.58    4.26
  -3  -3   1  172.49    4.19
  -3  -3   1  173.94    4.22
  -3  -3   1  174.94    4.21
   2   3  -1   31.45    1.06
   2   3  -1   34.16    1.13
  -2  -3   1   33.47    1.04
  -2  -3   1   33.45    1.08
  -2  -3   1   33.38    1.12
  -2  -3   1   33.63    1.11
  -2  -3   1   34.41    1.10
   1   3  -1   78.76    2.19
   1   3  -1   81.70    2.09
  -1  -3   1   83.88    2.22
  -1  -3   1   82.15    2.11
  -1  -3   1   84.10    2.12
  -1  -3   1   82.23    2.18
  -1  -3   1   81.98    2.05
  -1  -3   1   83.28    2.10
   0   3  -1   44.75    1.45
   0   3  -1   44.34    1.15
   0  -3   1   42.71    1.35
   0  -3   1   44.62    1.26
   0  -3   1   45.55    1.21
   0  -3   1   44.26    1.41
   0  -3   1   44.35    1.22
   0  -3   1   45.23    1.22
  -1   3  -1    1.00    0.30
   1  -3   1    0.46    0.24
   1  -3   1    0.86    0.34
   1  -3   1    0.84    0.16
   1  -3   1    0.89    0.18
   1  -3   1    0.81    0.18
   1  -3   1    0.73    0.29
  -2   3  -1    1.98    0.38
   2  -3   1    1.40    0.39
   2  -3   1    1.83    0.36
   2  -3   1    1.59    0.17
   2  -3   1    1.30    0.32
   2  -3   1    1.79    0.17
  -3   3  -1   34.68    1.33
   3  -3   1   32.28    1.26
   3  -3   1   33.15    1.24
   3  -3   1   33.02    1.26
  -4   3  -1    0.54    0.41
   4  -3   1    0.84    0.36
   4  -3   1    0.52    0.34
   4  -3   1    0.50    0.37
   4  -3   1    0.24    0.34
  -5   3  -1   22.30    1.28
   5  -3   1   22.74    1.24
   5  -3   1   24.12    1.23
   5  -3   1   23.98    1.18
   5  -3   1   26.20    1.19
  -6   3  -1   14.73    1.27
   6  -3   1   15.07    1.17
   6  -3   1   14.85    0.99
   6  -3   1   14.42    1.08
   6  -3   1   19.78    1.11
  -7   3  -1   18.06    1.37
   7  -3   1   16.47    1.24
   7  -3   1   16.07    1.29
   7  -3   1   15.91    1.19
   7  -3   1   13.87    1.12
   7  -3   1   19.01    1.11
  -8   3  -1   26.66    1.75
   8  -3   1   26.81    1.64
   8  -3   1   26.49    1.76
   8  -3   1   27.31    1.59
  -9   3  -1    3.35    1.00
   9  -3   1    3.35    0.98
   9  -3   1    2.67    0.85
 -10   3  -1    0.19    0.79
  10  -3   1    1.27    0.90
  10  -3   1   -0.83    0.67
  12   2  -1    1.41    0.95
  12   2  -1    0.68    0.86
  12   2  -1    0.79    0.51
 -12  -2   1    0.50    0.93
  11   2  -1    1.67    0.54
  11   2  -1    2.40    0.90
  11   2  -1    2.18    0.82
 -11  -2   1    0.81    0.85
  10   2  -1    0.08    0.69
  10   2  -1    0.96    0.70
  10   2  -1   -0.22    0.37
 -10  -2   1   -0.25    0.56
   9   2  -1    1.15    0.66
   9   2  -1   -0.11    0.37
  -9  -2   1    1.46    0.65
   8   2  -1   21.49    1.31
   8   2  -1   20.73    1.05
   8   2  -1   20.24    1.03
   8   2  -1   20.06    1.04
  -8  -2   1   18.84    1.31
   7   2  -1   18.38    1.12
   7   2  -1   16.55    0.91
   7   2  -1   18.40    0.92
   7   2  -1   17.26    0.88
  -7  -2   1   16.42    1.13
  -7  -2   1   17.98    1.10
  -7  -2   1   16.89    0.68
   6   2  -1   26.20    1.00
   6   2  -1   23.92    1.01
   6   2  -1   25.40    1.03
   6   2  -1   25.42    1.21
   6   2  -1   25.98    1.05
  -6  -2   1   25.68    0.90
  -6  -2   1   21.68    1.15
  -6  -2   1   25.07    1.19
  -6  -2   1   24.98    0.98
   5   2  -1  153.48    3.78
   5   2  -1  150.46    3.84
   5   2  -1  154.36    3.82
   5   2  -1  155.79    3.83
   5   2  -1  147.09    3.97
  -5  -2   1  145.28    3.99
  -5  -2   1  152.91    3.73
  -5  -2   1  156.31    3.78
  -5  -2   1  150.96    4.00
   4   2  -1    1.23    0.29
   4   2  -1    1.39    0.38
   4   2  -1    1.72    0.31
   4   2  -1    1.40    0.31
   4   2  -1    1.34    0.28
  -4  -2   1    1.24    0.36
  -4  -2   1    1.47    0.29
  -4  -2   1    1.57    0.40
  -4  -2   1    1.28    0.30
   3   2  -1    2.40    0.34
   3   2  -1    1.85    0.30
   3   2  -1    1.15    0.32
   3   2  -1    1.83    0.28
  -3  -2   1    2.20    0.31
  -3  -2   1    2.14    0.36
  -3  -2   1    1.84    0.35
  -3  -2   1    1.95    0.30
  -3  -2   1    1.99    0.36
  -3  -2   1    1.50    0.29
   2   2  -1    6.86    0.40
   2   2  -1    5.66    0.43
   2   2  -1    5.29    0.41
   2   2  -1    5.93    0.43
  -2  -2   1    6.01    0.42
  -2  -2   1    6.21    0.48
  -2  -2   1    6.31    0.46
  -2  -2   1    6.14    0.41
  -2  -2   1    5.74    0.43
  -2  -2   1    5.89    0.42
   1   2  -1    0.93    0.12
   1   2  -1    0.96    0.23
   1   2  -1    0.78    0.20
   1   2  -1    0.83    0.22
   1   2  -1    0.87    0.27
  -1  -2   1    1.02    0.24
  -1  -2   1    0.71    0.21
  -1  -2   1    1.01    0.20
  -1  -2   1    1.14    0.24
  -1  -2   1    0.71    0.21
   0   2  -1    3.37    0.39
   0   2  -1    1.88    0.18
   0  -2   1    2.27    0.28
   0  -2   1    2.16    0.22
   0  -2   1    2.20    0.31
   0  -2   1    2.34    0.22
   0  -2   1    2.14    0.21
   0  -2   1    3.15    0.28
  -1   2  -1   89.78    2.25
   1  -2   1   88.76    2.22
   1  -2   1   89.79    2.06
   1  -2   1   88.09    2.05
   1  -2   1   86.15    2.29
   1  -2   1   85.64    2.24
  -2   2  -1   69.98    1.94
   2  -2   1   66.66    1.91
  -3   2  -1   85.40    2.43
   3  -2   1   83.64    2.33
   3  -2   1   84.10    2.38
  -4   2  -1    8.80    0.76
   4  -2   1   10.75    0.75
   4  -2   1    9.60    0.66
   4  -2   1   10.02    0.71
  -5   2  -1    5.51    0.68
   5  -2   1    6.56    0.61
   5  -2   1    6.10    0.73
   5  -2   1    5.01    0.33
   5  -2   1    6.49    0.66
   5  -2   1    5.71    0.34
  -6   2  -1    0.45    0.49
   6  -2   1    0.06    0.42
   6  -2   1    0.92    0.22
   6  -2   1    0.47    0.21
   6  -2   1    0.21    0.32
   6  -2   1    0.97    0.44
   6  -2   1    1.15    0.45
  -7   2  -1   -0.08    0.57
   7  -2   1    0.41    0.40
   7  -2   1    0.81    0.53
   7  -2   1    0.39    0.23
   7  -2   1    0.32    0.23
   7  -2   1   -0.07    0.45
   7  -2   1    0.71    0.45
  -8   2  -1    9.96    1.18
   8  -2   1    7.86    0.93
   8  -2   1    8.01    1.03
   8  -2   1    7.27    0.55
   8  -2   1    6.11    1.04
  -9   2  -1   30.94    1.96
   9  -2   1   32.85    1.15
   9  -2   1   31.55    1.99
   9  -2   1   32.43    1.88
 -10   2  -1    0.69    0.84
  10  -2   1    0.69    0.34
  10  -2   1    1.32    0.90
  10  -2   1    0.72    0.83
 -11   2  -1   11.78    1.59
  11  -2   1   10.61    1.52
  11  -2   1   10.11    1.41
  11  -2   1    9.86    0.68
  12   1  -1    1.50    0.97
  12   1  -1    0.85    0.94
  12   1  -1    1.98    0.58
 -12  -1   1    2.03    1.06
  11   1  -1    7.27    1.28
  11   1  -1    8.91    0.88
  11   1  -1    7.11    1.14
 -11  -1   1    4.85    1.14
  10   1  -1   40.31    1.62
  10   1  -1   37.65    2.12
  10   1  -1   41.86    2.06
 -10  -1   1   40.47    2.17
   9   1  -1    4.61    0.91
   9   1  -1    7.24    1.00
   9   1  -1    6.23    0.66
  -9  -1   1    5.80    0.98
   8   1  -1   10.41    0.81
   8   1  -1    8.36    0.95
   8   1  -1    9.86    0.75
  -8  -1   1   10.06    1.07
   7   1  -1    6.89    0.62
   7   1  -1    6.70    0.64
   7   1  -1    6.83    0.60
   7   1  -1    7.78    0.83
   7   1  -1    5.64    0.55
  -7  -1   1    6.12    0.79
   6   1  -1    4.98    0.34
   6   1  -1    4.95    0.48
   6   1  -1    5.34    0.62
   6   1  -1    5.62    0.50
   6   1  -1    5.69    0.50
   6   1  -1    6.64    0.56
  -6  -1   1    5.03    0.67
   5   1  -1    6.59    0.50
   5   1  -1    6.71    0.51
   5   1  -1    6.81    0.64
   5   1  -1    7.42    0.53
   5   1  -1    6.92    0.33
   5   1  -1    6.39    0.48
  -5  -1   1    6.00    0.35
  -5  -1   1    6.29    0.65
   4   1  -1   25.57    0.86
   4   1  -1   25.37    0.87
   4   1  -1   25.14    1.01
   4   1  -1   24.53    0.67
   4   1  -1   23.60    0.85
   4   1  -1   25.36    0.87
  -4  -1   1   24.30    0.87
  -4  -1   1   23.74    0.77
  -4  -1   1   24.53    1.02
  -4  -1   1   25.83    1.03
   3   1  -1   25.36    0.92
   3   1  -1   24.30    0.81
   3   1  -1   24.91    0.83
   3   1  -1   24.10    0.79
   3   1  -1   24.59    0.80
  -3  -1   1   25.06    0.82
  -3  -1   1   24.63    0.93
  -3  -1   1   24.37    0.92
  -3  -1   1   24.64    0.77
   2   1  -1    7.71    0.44
   2   1  -1    8.41    0.41
   2   1  -1    7.97    0.41
   2   1  -1    8.15    0.37
   2   1  -1    8.49    0.43
  -2  -1   1    8.45    0.40
  -2  -1   1    8.13    0.44
  -2  -1   1    8.59    0.42
  -2  -1   1    8.63    0.49
   1   1  -1   68.84    1.71
   1   1  -1   71.88    1.72
   1   1  -1   70.66    1.73
   1   1  -1   70.46    1.68
  -1  -1   1   71.72    1.70
  -1  -1   1   71.27    1.72
  -1  -1   1   72.15    1.72
  -1  -1   1   70.12    1.65
  -1  -1   1   69.20    1.71
  -1  -1   1   71.44    1.72
  -1  -1   1   71.25    1.74
   0   1  -1   85.20    2.01
   0   1  -1   90.44    2.12
   0   1  -1   87.57    2.00
   0   1  -1   88.41    2.04
   0  -1   1   88.58    2.03
   0  -1   1   87.33    2.01
   0  -1   1   86.16    2.02
   0  -1   1   86.23    2.03
   0  -1   1   88.74    2.06
   0  -1   1   87.32    2.02
   0  -1   1   84.97    2.09
  -1   1  -1    4.84    0.34
   1  -1   1    4.09    0.32
  -2   1  -1   30.69    1.02
   2  -1   1   29.80    0.98
   2  -1   1   29.83    0.94
  -3   1  -1  111.43    2.96
   3  -1   1  111.98    2.61
   3  -1   1  113.72    2.96
   3  -1   1  111.41    2.61
   3  -1   1  111.71    2.90
   3  -1   1  112.14    2.83
  -4   1  -1   98.71    2.77
   4  -1   1   96.80    2.34
   4  -1   1   96.40    2.29
   4  -1   1   97.15    2.55
   4  -1   1   92.82    2.64
   4  -1   1   99.72    2.75
   4  -1   1   96.64    2.34
  -5   1  -1    4.65    0.64
   5  -1   1    5.00    0.55
   5  -1   1    5.32    0.38
   5  -1   1    5.60    0.35
   5  -1   1    5.42    0.37
   5  -1   1    5.16    0.49
   5  -1   1    3.98    0.55
  -6   1  -1   60.24    2.23
   6  -1   1   63.80    1.72
   6  -1   1   61.45    1.71
   6  -1   1   62.42    2.07
   6  -1   1   60.89    2.17
   6  -1   1   65.06    1.91
  -7   1  -1   44.91    1.92
   7  -1   1   42.68    1.35
   7  -1   1   43.41    1.71
   7  -1   1   45.60    1.87
   7  -1   1   42.70    1.35
  -8   1  -1    0.25    0.51
   8  -1   1    0.32    0.29
   8  -1   1    0.20    0.41
   8  -1   1   -0.36    0.56
  -9   1  -1    4.60    1.01
   9  -1   1    5.65    1.05
   9  -1   1    5.47    0.58
   9  -1   1    5.22    0.97
 -10   1  -1    0.30    0.77
  10  -1   1    0.15    0.68
  10  -1   1    0.71    0.39
  10  -1   1    0.38    0.78
 -11   1  -1    0.54    0.87
  11  -1   1    0.87    0.84
  11  -1   1    0.00    0.36
  11  -1   1   -0.03    0.86
  12   0  -1    6.30    1.39
  12   0  -1    7.64    0.82
  12   0  -1    7.15    1.29
 -12   0   1    5.72    1.29
  11   0  -1    0.60    0.79
  11   0  -1    0.52    0.88
  11   0  -1    0.30    0.42
 -11   0   1    0.92    0.85
  10   0  -1    0.61    0.39
  10   0  -1    1.34    0.76
  10   0  -1    1.46    0.85
 -10   0   1    0.36    0.77
   9   0  -1    5.62    1.00
   9   0  -1    5.14    0.90
   9   0  -1    3.81    0.54
  -9   0   1    1.72    0.84
   8   0  -1    3.40    0.72
   8   0  -1    3.20    0.58
   8   0  -1    3.89    0.50
  -8   0   1    2.99    0.80
   7   0  -1   61.23    2.25
   7   0  -1   63.90    1.87
   7   0  -1   64.11    1.87
   7   0  -1   64.16    2.06
  -7   0   1   62.89    2.38
   6   0  -1   42.67    1.31
   6   0  -1   41.96    1.29
   6   0  -1   41.16    1.61
   6   0  -1   41.23    1.29
   6   0  -1   44.20    1.49
   6   0  -1   40.80    1.30
  -6   0   1   41.66    1.71
   5   0  -1   49.28    1.67
   5   0  -1   49.30    1.38
   5   0  -1   46.46    1.36
   5   0  -1   47.45    1.51
   5   0  -1   47.52    1.34
   5   0  -1   47.17    1.37
  -5   0   1   44.62    1.67
   4   0  -1   50.14    1.35
   4   0  -1   47.51    1.31
   4   0  -1   49.08    1.34
   4   0  -1   48.73    1.47
   4   0  -1   49.65    1.58
   4   0  -1   47.53    1.34
  -4   0   1   51.50    1.66
   3   0  -1   20.39    0.65
   3   0  -1   19.34    0.62
   3   0  -1   20.94    0.74
   3   0  -1   19.98    0.81
   3   0  -1   20.48    0.64
  -3   0   1   19.82    0.84
   2   0  -1   31.75    0.84
   2   0  -1   34.25    0.99
   2   0  -1   32.52    0.86
   2   0  -1   32.59    0.86
   2   0  -1   33.32    0.93
  -2   0   1   33.80    1.04
   1   0  -1   46.33    1.09
   1   0  -1   45.83    1.11
   1   0  -1   44.19    1.08
   1   0  -1   46.73    1.09
   1   0  -1   46.56    1.15
  -1   0   1   45.92    1.06
  -1   0   1   45.48    1.14
  -1   0   1   45.86    1.18
  -1   0  -1  256.56    5.85
  -1   0  -1  256.23    5.89
  -1   0  -1  260.52    5.79
   1   0   1  261.40    5.90
   1   0   1  263.82    5.83
   1   0   1  257.48    5.87
   1   0   1  252.39    5.80
   1   0   1  257.12    5.81
   1   0   1  256.41    5.81
  -2   0  -1  364.59    8.64
   2   0   1  368.82    8.58
   2   0   1  379.49    8.48
   2   0   1  380.22    8.49
   2   0   1  372.79    8.46
   2   0   1  381.07    8.51
   2   0   1  379.24    8.64
  -3   0  -1    1.56    0.36
   3   0   1    1.72    0.32
   3   0   1    2.18    0.26
   3   0   1    1.44    0.23
   3   0   1    2.11    0.24
   3   0   1    1.70    0.29
   3   0   1    1.70    0.21
  -4   0  -1   56.36    1.80
   4   0   1   56.55    1.50
   4   0   1   55.78    1.65
   4   0   1   56.13    1.52
   4   0   1   54.33    1.46
   4   0   1   57.45    1.50
   4   0   1   54.21    1.75
  -5   0  -1    8.40    0.75
   5   0   1    8.61    0.51
   5   0   1    8.14    0.46
   5   0   1    9.56    0.80
   5   0   1    9.21    0.65
   5   0   1    8.30    0.49
   5   0   1    7.54    0.48
  -6   0  -1    0.93    0.46
   6   0   1    0.14    0.30
   6   0   1    0.98    0.44
   6   0   1    0.39    0.25
   6   0   1    0.48    0.25
   6   0   1    0.28    0.23
   6   0   1    0.15    0.24
  -7   0  -1    7.16    0.88
   7   0   1    6.14    0.68
   7   0   1    5.96    0.54
   7   0   1    7.59    0.88
   7   0   1    6.85    0.55
  -8   0  -1    1.03    0.62
   8   0   1    0.96    0.38
   8   0   1    0.47    0.56
   8   0   1    1.28    0.47
  -9   0  -1   24.95    1.60
   9   0   1   26.45    1.17
   9   0   1   24.02    1.62
 -10   0  -1   38.89    2.12
  10   0   1   40.23    2.20
  10   0   1   42.53    1.56
  10   0   1   34.29    2.02
 -11   0  -1    0.59    0.77
  11   0   1    1.67    0.99
  11   0   1    0.84    0.46
  11   0   1    1.11    0.85
 -12   0  -1   11.24    1.59
  12   0   1    8.52    1.31
  12   0   1    9.00    1.54
  12   0   1    8.81    0.89
  11  -1  -1    8.41    1.42
  11  -1  -1    6.18    1.15
  11  -1  -1    6.96    0.70
 -11   1   1    7.06    1.30
  10  -1  -1   12.23    1.48
  10  -1  -1   10.82    1.30
  10  -1  -1   11.98    0.83
 -10   1   1   10.71    1.44
   9  -1  -1   37.64    1.89
   9  -1  -1   36.20    2.06
   9  -1  -1   35.02    1.31
  -9   1   1   38.20    2.07
   8  -1  -1    5.60    0.92
   8  -1  -1    6.67    0.93
   8  -1  -1    5.62    0.53
   8  -1  -1    6.87    0.80
  -8   1   1    5.42    0.96
   7  -1  -1    7.89    0.56
   7  -1  -1    8.09    0.80
   7  -1  -1    9.98    1.00
   7  -1  -1    7.58    0.55
  -7   1   1    8.55    1.02
   6  -1  -1    2.53    0.55
   6  -1  -1    3.52    0.53
   6  -1  -1    2.88    0.34
   6  -1  -1    3.18    0.34
   6  -1  -1    3.52    0.46
  -6   1   1    2.91    0.58
   5  -1  -1    4.56    0.58
   5  -1  -1    3.20    0.30
   5  -1  -1    3.19    0.29
   5  -1  -1    3.48    0.31
   5  -1  -1    4.48    0.52
   5  -1  -1    3.92    0.44
  -5   1   1    3.76    0.56
   4  -1  -1   92.72    2.18
   4  -1  -1   90.42    2.39
   4  -1  -1   91.35    2.55
   4  -1  -1   89.23    2.47
   4  -1  -1   86.85    2.13
   4  -1  -1   88.31    2.18
  -4   1   1   90.82    2.64
   3  -1  -1   67.36    1.61
   3  -1  -1   65.81    1.61
   3  -1  -1   65.77    1.87
   3  -1  -1   70.06    1.93
  -3   1   1   68.22    2.00
   2  -1  -1    7.87    0.48
  -2   1   1    6.60    0.51
  -1   1   1  175.54    4.15
   0  -1  -1   76.17    1.79
   0  -1  -1   77.91    1.78
   0  -1  -1   76.13    1.78
   0  -1  -1   78.66    1.86
   0  -1  -1   79.55    1.88
   0  -1  -1   75.43    1.79
   0   1   1   77.74    1.78
   0   1   1   76.21    1.85
   0   1   1   77.94    1.85
  -1  -1  -1    3.51    0.24
  -1  -1  -1    3.44    0.22
  -1  -1  -1    3.59    0.21
  -1  -1  -1    3.85    0.24
   1   1   1    3.69    0.23
   1   1   1    3.32    0.22
   1   1   1    3.44    0.22
   1   1   1    3.68    0.24
  -2  -1  -1  102.27    2.46
  -2  -1  -1  101.71    2.54
  -2  -1  -1  104.26    2.41
  -2  -1  -1  102.29    2.51
  -2  -1  -1  101.43    2.53
   2   1   1  100.94    2.47
   2   1   1  101.47    2.46
   2   1   1  101.08    2.47
   2   1   1  101.08    2.47
   2   1   1  104.56    2.33
   2   1   1  101.37    2.54
  -3  -1  -1    5.96    0.47
  -3  -1  -1    5.39    0.48
  -3  -1  -1    6.13    0.35
  -3  -1  -1    5.49    0.37
   3   1   1    6.35    0.50
   3   1   1    5.72    0.41
   3   1   1    5.81    0.41
   3   1   1    5.01    0.39
   3   1   1    6.20    0.26
   3   1   1    5.68    0.41
  -4  -1  -1   11.17    0.47
  -4  -1  -1   11.11    0.66
  -4  -1  -1   10.31    0.66
   4   1   1   10.49    0.40
   4   1   1    9.20    0.67
   4   1   1   10.74    0.54
   4   1   1   11.01    0.54
   4   1   1   10.20    0.55
   4   1   1   10.07    0.58
  -5  -1  -1   89.40    2.53
  -5  -1  -1   87.39    2.61
  -5  -1  -1   87.33    2.15
   5   1   1   86.16    2.32
   5   1   1   89.68    2.15
   5   1   1   90.33    2.59
   5   1   1   87.43    2.41
   5   1   1   91.23    2.35
   5   1   1   82.78    2.30
  -6  -1  -1    7.16    0.73
   6   1   1    7.75    0.58
   6   1   1    8.45    0.42
   6   1   1    7.50    0.56
   6   1   1    7.95    0.62
   6   1   1    6.96    0.72
   6   1   1    8.07    0.56
  -7  -1  -1   67.82    2.39
   7   1   1   65.65    2.08
   7   1   1   65.43    1.97
   7   1   1   64.99    2.31
   7   1   1   65.87    1.98
   7   1   1   67.15    1.98
  -8  -1  -1   22.88    1.43
   8   1   1   24.27    1.39
   8   1   1   19.18    1.10
   8   1   1   22.77    1.06
  -9  -1  -1    0.51    0.61
   9   1   1    0.12    0.38
   9   1   1   -0.72    0.57
 -10  -1  -1    0.57    0.69
  10   1   1   -0.30    0.39
  10   1   1   -0.27    0.68
  10   1   1    0.32    0.63
 -11  -1  -1    0.91    0.82
  11   1   1    0.93    0.84
  11   1   1    0.95    0.49
  11   1   1    1.14    0.82
 -12  -1  -1    5.55    1.29
  12   1   1    5.11    1.22
  12   1   1    4.65    0.76
  12   1   1    4.37    1.10
  11  -2  -1    1.79    0.39
  11  -2  -1    1.77    0.96
 -11   2   1    2.68    1.00
  10  -2  -1    1.64    0.90
  10  -2  -1    0.00    0.30
  10  -2  -1    0.26    0.67
 -10   2   1    1.14    0.85
   9  -2  -1    8.78    1.15
   9  -2  -1    8.86    1.27
   9  -2  -1    8.04    0.61
  -9   2   1   10.63    1.34
   8  -2  -1   18.47    1.34
   8  -2  -1   17.89    1.44
   8  -2  -1   19.45    0.80
  -8   2   1   20.18    1.53
   7  -2  -1    3.02    0.67
   7  -2  -1    3.03    0.35
   7  -2  -1    2.70    0.33
   7  -2  -1    4.48    0.83
   7  -2  -1    2.36    0.57
  -7   2   1    3.46    0.76
   6  -2  -1   65.30    1.71
   6  -2  -1   65.07    2.29
   6  -2  -1   68.46    2.12
   6  -2  -1   64.16    1.71
   6  -2  -1   65.45    2.21
  -6   2   1   67.68    2.42
   5  -2  -1   24.11    1.16
   5  -2  -1   23.74    1.06
   5  -2  -1   23.15    0.71
   5  -2  -1   24.59    1.12
   5  -2  -1   23.24    0.71
  -5   2   1   24.77    1.28
   4  -2  -1   20.54    1.01
   4  -2  -1   19.33    0.94
   4  -2  -1   20.24    0.92
  -4   2   1   20.81    1.07
   3  -2  -1   59.21    1.79
  -3   2   1   56.55    1.83
  -2   2   1    0.86    0.34
   1  -2  -1   14.27    0.41
   1  -2  -1   14.72    0.41
   1  -2  -1   14.28    0.65
   1  -2  -1   15.04    0.63
  -1   2   1   14.23    0.66
   0  -2  -1    4.07    0.35
   0  -2  -1    3.68    0.25
   0  -2  -1    3.49    0.34
   0  -2  -1    4.18    0.38
   0  -2  -1    3.97    0.28
   0  -2  -1    3.55    0.27
   0  -2  -1    3.62    0.23
   0   2   1    3.95    0.24
   0   2   1    3.84    0.37
  -1  -2  -1    5.86    0.38
  -1  -2  -1    5.86    0.36
  -1  -2  -1    5.74    0.41
  -1  -2  -1    5.91    0.42
  -1  -2  -1    6.01    0.38
   1   2   1    5.18    0.37
   1   2   1    5.09    0.39
   1   2   1    5.52    0.36
   1   2   1    5.32    0.39
  -2  -2  -1  341.98    7.64
  -2  -2  -1  335.14    7.66
  -2  -2  -1  323.85    7.66
  -2  -2  -1  334.83    7.59
   2   2   1  320.21    7.63
   2   2   1  328.29    7.64
   2   2   1  331.56    7.67
   2   2   1  333.31    7.63
  -3  -2  -1  127.81    3.17
  -3  -2  -1  128.73    3.03
  -3  -2  -1  122.70    3.19
  -3  -2  -1  127.22    3.09
  -3  -2  -1  121.97    3.16
  -3  -2  -1  125.98    3.10
   3   2   1  124.81    3.08
   3   2   1  127.63    3.12
   3   2   1  125.55    3.11
   3   2   1  122.61    3.17
  -4  -2  -1    2.80    0.45
  -4  -2  -1    3.35    0.45
  -4  -2  -1    1.93    0.29
  -4  -2  -1    1.51    0.40
  -4  -2  -1    2.27    0.33
   4   2   1    2.65    0.37
   4   2   1    2.07    0.34
   4   2   1    2.46    0.36
   4   2   1    2.36    0.33
   4   2   1    1.72    0.37
  -5  -2  -1    1.17    0.38
  -5  -2  -1    0.20    0.23
  -5  -2  -1    0.82    0.36
  -5  -2  -1    0.41    0.24
   5   2   1    0.50    0.28
   5   2   1    0.68    0.29
   5   2   1    0.41    0.33
   5   2   1   -0.06    0.25
   5   2   1    0.37    0.30
  -6  -2  -1    6.34    0.47
  -6  -2  -1    5.51    0.64
  -6  -2  -1    7.70    0.73
   6   2   1    6.54    0.56
   6   2   1    7.01    0.59
   6   2   1    7.70    0.59
   6   2   1    6.95    0.70
   6   2   1    7.29    0.61
  -7  -2  -1    4.22    0.64
  -7  -2  -1    2.43    0.58
  -7  -2  -1    3.07    0.33
   7   2   1    2.06    0.42
   7   2   1    3.20    0.48
   7   2   1    3.23    0.64
   7   2   1    2.17    0.44
  -8  -2  -1   32.09    1.65
   8   2   1   32.71    1.34
   8   2   1   33.47    1.62
   8   2   1   32.50    1.36
   8   2   1   32.74    1.35
  -9  -2  -1   13.93    1.36
   9   2   1   12.82    0.93
   9   2   1   15.37    1.33
 -10  -2  -1   21.81    1.51
  10   2   1   19.09    1.61
  10   2   1   19.24    1.16
 -11  -2  -1   16.94    1.68
  11   2   1   17.03    1.17
  11   2   1   19.56    1.68
  11   2   1   17.04    1.69
 -12  -2  -1   -0.85    0.79
  12   2   1    0.10    0.80
  12   2   1    0.87    0.78
  12   2   1    0.82    0.51
  10  -3  -1   10.85    1.54
  10  -3  -1    7.51    1.32
 -10   3   1   10.91    1.47
   9  -3  -1    1.56    0.89
   9  -3  -1    1.07    0.74
  -9   3   1    2.14    0.90
   8  -3  -1    5.00    1.01
   8  -3  -1    4.59    0.90
  -8   3   1    5.24    1.02
   7  -3  -1    0.39    0.53
   7  -3  -1   -0.30    0.44
   7  -3  -1    0.76    0.61
   7  -3  -1   -0.26    0.46
   7  -3  -1   -0.03    0.55
  -7   3   1    0.74    0.61
   6  -3  -1    0.58    0.44
   6  -3  -1    0.56    0.46
   6  -3  -1   -0.52    0.43
   6  -3  -1    0.54    0.41
   6  -3  -1    0.09    0.46
  -6   3   1    0.70    0.56
   5  -3  -1   14.34    0.93
   5  -3  -1   16.07    1.02
   5  -3  -1   16.29    1.02
  -5   3   1   15.66    1.05
   4  -3  -1    2.92    0.50
   4  -3  -1    2.24    0.51
   4  -3  -1    2.72    0.48
  -4   3   1    3.64    0.55
   3  -3  -1   39.26    1.42
   3  -3  -1   37.52    1.39
  -3   3   1   38.65    1.46
   2  -3  -1  139.10    3.28
   2  -3  -1  143.01    3.74
   2  -3  -1  139.20    3.67
   2  -3  -1  146.69    3.72
  -2   3   1  148.57    3.74
   1  -3  -1   19.70    0.87
   1  -3  -1   17.40    0.81
   1  -3  -1   18.59    0.58
   1  -3  -1   18.87    0.70
   1  -3  -1   19.22    0.80
   1  -3  -1   17.67    0.58
   1  -3  -1   18.23    0.54
  -1   3   1   19.94    0.85
   0  -3  -1   30.38    0.89
   0  -3  -1   29.13    0.87
   0  -3  -1   29.33    0.89
   0  -3  -1   29.28    1.07
   0  -3  -1   30.71    1.05
   0  -3  -1   29.89    1.01
   0  -3  -1   30.49    0.82
   0   3   1   30.05    1.09
   0   3   1   30.82    0.82
  -1  -3  -1    2.02    0.34
  -1  -3  -1    2.53    0.30
  -1  -3  -1    3.19    0.40
  -1  -3  -1    2.72    0.32
  -1  -3  -1    2.28    0.30
  -1  -3  -1    2.17    0.29
   1   3   1    2.14    0.28
   1   3   1    2.44    0.36
   1   3   1    3.22    0.38
  -2  -3  -1   11.42    0.58
  -2  -3  -1   11.40    0.61
  -2  -3  -1   10.19    0.60
  -2  -3  -1   11.23    0.61
  -2  -3  -1   11.20    0.57
   2   3   1   10.76    0.58
   2   3   1   10.87    0.57
   2   3   1   11.17    0.60
   2   3   1    9.93    0.61
  -3  -3  -1   96.60    2.56
  -3  -3  -1   95.01    2.53
  -3  -3  -1   96.42    2.45
  -3  -3  -1   94.24    2.50
  -3  -3  -1   94.76    2.50
   3   3   1   94.42    2.55
   3   3   1   93.80    2.51
   3   3   1   97.30    2.49
   3   3   1   96.33    2.51
  -4  -3  -1    8.62    0.60
  -4  -3  -1    8.46    0.67
  -4  -3  -1    9.23    0.59
  -4  -3  -1    8.84    0.65
  -4  -3  -1    8.96    0.55
  -4  -3  -1    9.91    0.65
   4   3   1    9.60    0.59
   4   3   1    9.86    0.70
   4   3   1    9.02    0.62
   4   3   1    9.88    0.64
  -5  -3  -1   20.68    0.88
  -5  -3  -1   19.67    0.81
  -5  -3  -1   20.64    1.04
  -5  -3  -1   22.46    1.02
  -5  -3  -1   22.51    1.04
   5   3   1   21.74    0.89
   5   3   1   19.93    0.93
   5   3   1   18.13    0.96
   5   3   1   19.53    0.91
  -6  -3  -1  109.97    3.18
  -6  -3  -1  113.50    2.97
  -6  -3  -1  111.18    3.22
  -6  -3  -1  111.98    2.89
   6   3   1  111.17    3.21
   6   3   1  111.83    3.05
   6   3   1  109.22    3.03
   6   3   1  110.41    2.99
   6   3   1  115.16    3.08
  -7  -3  -1    3.05    0.60
  -7  -3  -1    2.80    0.40
  -7  -3  -1    3.65    0.43
  -7  -3  -1    2.69    0.61
   7   3   1    2.89    0.47
   7   3   1    3.24    0.49
   7   3   1    3.71    0.65
   7   3   1    2.63    0.48
  -8  -3  -1   11.12    1.12
  -8  -3  -1   10.43    1.00
   8   3   1    9.62    0.81
   8   3   1   10.78    0.82
   8   3   1   11.09    1.09
   8   3   1   10.01    0.84
  -9  -3  -1    3.22    0.77
   9   3   1    3.93    0.62
   9   3   1    3.79    0.63
   9   3   1    2.99    0.57
   9   3   1    3.51    0.76
 -10  -3  -1    0.15    0.60
  10   3   1    0.68    0.47
  10   3   1    1.25    0.68
 -11  -3  -1    9.29    1.27
  11   3   1    6.97    0.86
  11   3   1    7.81    1.17
  11   3   1    8.27    1.28
 -12  -3  -1    6.62    1.28
  12   3   1    6.34    1.20
  12   3   1    6.15    0.87
  12   3   1    7.04    1.24
 -13  -3  -1    2.84    1.09
  13   3   1    2.43    1.02
  13   3   1    2.16    0.68
  13   3   1    2.10    1.02
  10  -4  -1    2.43    1.01
 -10   4   1   -0.88    0.83
   9  -4  -1    0.83    0.79
   9  -4  -1   -0.26    0.74
  -9   4   1   -0.19    0.79
   8  -4  -1   17.75    1.63
   8  -4  -1   20.82    1.78
   8  -4  -1   19.53    1.50
  -8   4   1   21.72    1.83
   7  -4  -1   22.14    1.70
   7  -4  -1   27.86    1.57
   7  -4  -1   25.03    1.45
   7  -4  -1   27.98    1.56
   7  -4  -1   21.92    1.53
   7  -4  -1   27.38    1.67
   7  -4  -1   25.14    1.50
  -7   4   1   24.22    1.71
   6  -4  -1    1.38    0.56
   6  -4  -1    1.28    0.57
   6  -4  -1    1.27    0.58
   6  -4  -1    0.99    0.55
   6  -4  -1    1.64    0.61
   6  -4  -1    0.59    0.52
   6  -4  -1    1.26    0.53
  -6   4   1    1.85    0.65
   5  -4  -1   42.23    1.76
   5  -4  -1   42.99    1.73
   5  -4  -1   40.96    1.77
   5  -4  -1   44.10    1.84
   5  -4  -1   42.20    1.76
   5  -4  -1   44.32    1.78
   5  -4  -1   43.48    1.80
  -5   4   1   38.76    1.81
   4  -4  -1    9.98    0.86
   4  -4  -1    8.90    0.83
   4  -4  -1    7.71    0.82
   4  -4  -1    8.97    0.85
   4  -4  -1    9.81    0.91
  -4   4   1   10.06    0.94
   3  -4  -1    0.44    0.31
   3  -4  -1    0.10    0.35
   3  -4  -1    0.51    0.36
   3  -4  -1    0.17    0.37
  -3   4   1    0.62    0.41
   2  -4  -1   18.37    0.92
   2  -4  -1   18.55    0.60
   2  -4  -1   18.28    0.83
   2  -4  -1   19.33    0.95
   2  -4  -1   18.79    0.56
   2  -4  -1   18.66    0.60
   2  -4  -1   16.77    0.97
  -2   4   1   19.55    0.98
   1  -4  -1   34.40    1.02
   1  -4  -1   36.92    1.30
   1  -4  -1   35.69    1.00
   1  -4  -1   34.85    1.36
   1  -4  -1   35.68    1.11
   1  -4  -1   36.26    1.31
   1  -4  -1   35.13    1.03
  -1   4   1   33.93    1.30
   0  -4  -1   20.05    0.73
   0  -4  -1   20.48    0.85
   0  -4  -1   19.39    0.61
   0  -4  -1   19.26    0.94
   0  -4  -1   18.07    0.88
   0  -4  -1   19.93    0.71
   0  -4  -1   18.74    0.72
   0   4   1   19.93    0.97
   0   4   1   18.48    0.60
  -1  -4  -1  118.71    3.08
  -1  -4  -1  117.42    2.94
  -1  -4  -1  115.82    2.94
  -1  -4  -1  116.03    3.11
  -1  -4  -1  115.00    2.93
  -1  -4  -1  113.78    2.94
   1   4   1  118.73    3.09
   1   4   1  118.18    2.89
  -2  -4  -1   43.72    1.35
  -2  -4  -1   40.87    1.41
  -2  -4  -1   41.52    1.32
  -2  -4  -1   45.38    1.38
  -2  -4  -1   43.56    1.44
   2   4   1   42.98    1.34
   2   4   1   46.15    1.35
   2   4   1   43.20    1.42
   2   4   1   41.82    1.40
  -3  -4  -1   60.68    1.78
  -3  -4  -1   59.49    1.77
  -3  -4  -1   58.91    1.84
  -3  -4  -1   58.73    1.76
  -3  -4  -1   61.61    1.77
   3   4   1   58.61    1.76
   3   4   1   55.96    1.75
   3   4   1   59.88    1.75
   3   4   1   59.11    1.82
  -4  -4  -1   36.55    1.29
  -4  -4  -1   37.92    1.29
  -4  -4  -1   35.87    1.36
  -4  -4  -1   36.69    1.26
  -4  -4  -1   36.19    1.32
   4   4   1   36.83    1.31
   4   4   1   37.78    1.38
   4   4   1   35.58    1.26
   4   4   1   35.37    1.29
  -5  -4  -1   -0.24    0.29
  -5  -4  -1    0.70    0.39
  -5  -4  -1    0.49    0.30
  -5  -4  -1   -0.04    0.38
  -5  -4  -1    0.19    0.31
  -5  -4  -1    0.20    0.30
   5   4   1    0.27    0.30
   5   4   1   -0.08    0.35
   5   4   1    0.04    0.33
   5   4   1   -0.02    0.32
  -6  -4  -1   10.38    0.74
  -6  -4  -1   10.94    0.74
  -6  -4  -1   12.28    0.86
  -6  -4  -1   11.41    0.95
  -6  -4  -1   11.74    0.85
  -6  -4  -1   10.11    0.65
   6   4   1   10.45    0.79
   6   4   1   11.14    0.79
   6   4   1   12.72    0.76
   6   4   1   10.95    0.87
  -7  -4  -1    5.32    0.58
  -7  -4  -1    5.84    0.72
  -7  -4  -1    6.16    0.57
  -7  -4  -1    5.98    0.75
   7   4   1    6.53    0.71
   7   4   1    6.62    0.65
   7   4   1    4.83    0.63
   7   4   1    5.91    0.75
  -8  -4  -1   12.30    0.81
  -8  -4  -1   10.24    1.00
  -8  -4  -1   10.48    0.70
  -8  -4  -1    9.35    0.96
   8   4   1   11.00    1.09
   8   4   1   11.25    0.94
   8   4   1   10.98    0.82
   8   4   1   11.53    0.92
  -9  -4  -1   65.20    2.48
  -9  -4  -1   67.00    2.03
  -9  -4  -1   65.97    2.56
   9   4   1   63.99    2.26
   9   4   1   63.89    2.28
   9   4   1   65.50    2.17
   9   4   1   62.28    2.48
 -10  -4  -1   18.38    1.43
 -10  -4  -1   17.56    1.51
  10   4   1   17.33    1.22
  10   4   1   15.09    1.39
  10   4   1   17.15    1.17
 -11  -4  -1    5.31    0.98
  11   4   1    5.47    1.10
  11   4   1    5.44    0.83
  11   4   1    5.32    1.09
 -12  -4  -1    7.63    1.32
  12   4   1    6.42    1.29
  12   4   1    8.47    1.30
  12   4   1    5.91    0.93
 -13  -4  -1   -1.15    0.84
  13   4   1   -0.30    0.84
  13   4   1    1.05    0.64
  13   4   1    0.51    0.89
   9  -5  -1   13.01    1.54
  -9   5   1   14.47    1.75
   8  -5  -1   -0.16    0.68
   8  -5  -1   -1.20    0.63
   8  -5  -1   -0.26    1.00
  -8   5   1   -0.06    0.78
   7  -5  -1   -0.03    0.58
   7  -5  -1   -0.12    0.55
   7  -5  -1    0.90    0.68
   7  -5  -1   -0.29    0.57
   7  -5  -1    0.65    0.62
  -7   5   1    1.06    0.75
   6  -5  -1    0.05    0.56
   6  -5  -1    0.27    0.52
   6  -5  -1   -0.19    0.52
   6  -5  -1   -0.37    0.46
   6  -5  -1   -0.05    0.51
   6  -5  -1   -0.07    0.56
   6  -5  -1    0.26    0.57
  -6   5   1    1.45    0.77
   5  -5  -1    5.74    0.82
   5  -5  -1    6.04    0.81
   5  -5  -1    6.84    0.89
   5  -5  -1    5.45    0.85
   5  -5  -1    5.25    0.81
   5  -5  -1    6.82    0.89
   5  -5  -1    8.76    0.95
  -5   5   1    7.95    1.01
   4  -5  -1   71.55    2.48
   4  -5  -1   71.17    2.36
   4  -5  -1   70.89    2.54
   4  -5  -1   74.65    2.53
   4  -5  -1   72.07    2.48
  -4   5   1   75.12    2.61
   3  -5  -1    3.57    0.61
   3  -5  -1    3.15    0.62
   3  -5  -1    2.08    0.25
   3  -5  -1    2.25    0.58
   3  -5  -1    1.94    0.24
   3  -5  -1    2.16    0.46
   3  -5  -1    1.89    0.49
  -3   5   1    2.16    0.57
   2  -5  -1   22.68    0.79
   2  -5  -1   24.91    1.16
   2  -5  -1   23.57    1.19
   2  -5  -1   21.80    1.20
   2  -5  -1   23.86    0.79
   2  -5  -1   24.22    0.76
   2  -5  -1   24.84    1.00
  -2   5   1   22.71    1.18
   1  -5  -1   90.55    2.67
   1  -5  -1   93.78    2.37
   1  -5  -1   93.19    2.81
   1  -5  -1   93.61    2.42
   1  -5  -1   93.37    2.71
   1  -5  -1   92.18    2.34
   1  -5  -1   89.77    2.37
   0  -5  -1    0.00    0.25
   0  -5  -1   -0.11    0.29
   0  -5  -1    0.06    0.26
   0  -5  -1   -0.06    0.24
   0  -5  -1   -0.08    0.36
   0  -5  -1   -0.09    0.36
   0  -5  -1    0.53    0.18
   0   5   1   -0.19    0.14
  -1  -5  -1   10.48    0.75
  -1  -5  -1    9.57    0.61
  -1  -5  -1    8.86    0.60
  -1  -5  -1   10.62    0.64
  -1  -5  -1    9.84    0.78
  -1  -5  -1    9.04    0.61
   1   5   1   10.84    0.78
   1   5   1    8.23    0.53
  -2  -5  -1   11.66    0.69
  -2  -5  -1   11.69    0.79
  -2  -5  -1   10.74    0.71
  -2  -5  -1   13.33    0.82
  -2  -5  -1   10.12    0.69
   2   5   1   10.97    0.66
   2   5   1   12.79    0.78
   2   5   1   11.74    0.80
  -3  -5  -1   56.53    1.83
  -3  -5  -1   54.84    1.74
  -3  -5  -1   56.05    1.69
  -3  -5  -1   53.08    1.72
  -3  -5  -1   55.80    1.78
   3   5   1   54.75    1.80
   3   5   1   54.23    1.75
   3   5   1   53.23    1.70
   3   5   1   54.02    1.70
  -4  -5  -1  116.14    3.16
  -4  -5  -1  116.99    3.14
  -4  -5  -1  117.84    3.26
  -4  -5  -1  113.79    3.16
  -4  -5  -1  118.30    3.16
   4   5   1  118.07    3.15
   4   5   1  119.56    3.17
   4   5   1  113.94    3.22
   4   5   1  114.45    3.15
  -5  -5  -1   32.01    1.40
  -5  -5  -1   34.36    1.37
  -5  -5  -1   34.39    1.32
  -5  -5  -1   30.98    1.24
  -5  -5  -1   34.60    1.34
  -5  -5  -1   33.04    1.33
   5   5   1   35.55    1.37
   5   5   1   33.91    1.34
   5   5   1   34.30    1.43
   5   5   1   34.03    1.29
  -6  -5  -1   11.41    0.98
  -6  -5  -1   11.52    0.86
  -6  -5  -1    9.96    0.72
  -6  -5  -1   10.66    0.93
  -6  -5  -1   11.38    0.83
  -6  -5  -1   10.36    0.47
  -6  -5  -1   11.25    0.81
   6   5   1   10.26    0.75
   6   5   1   11.81    0.91
   6   5   1   11.25    0.84
   6   5   1   11.57    0.85
  -7  -5  -1  105.66    3.21
  -7  -5  -1  105.98    3.24
  -7  -5  -1  100.16    3.23
  -7  -5  -1  107.96    2.95
  -7  -5  -1  106.42    3.05
   7   5   1  108.33    3.15
   7   5   1  104.14    3.24
   7   5   1  109.40    3.04
   7   5   1  108.34    3.14
  -8  -5  -1    1.51    0.60
  -8  -5  -1    2.30    0.67
  -8  -5  -1    2.58    0.51
  -8  -5  -1    1.31    0.40
   8   5   1    2.08    0.53
   8   5   1    1.96    0.47
   8   5   1    1.21    0.50
   8   5   1    2.31    0.69
  -9  -5  -1    0.56    0.62
  -9  -5  -1    0.59    0.60
  -9  -5  -1    0.67    0.41
   9   5   1    0.28    0.62
   9   5   1   -0.57    0.43
   9   5   1   -0.04    0.42
   9   5   1   -0.04    0.39
 -10  -5  -1    1.85    0.73
 -10  -5  -1    1.93    0.48
 -10  -5  -1    2.29    0.77
  10   5   1    2.10    0.65
  10   5   1    2.53    0.80
  10   5   1    3.22    0.70
 -11  -5  -1    0.03    0.63
 -11  -5  -1    0.72    0.73
  11   5   1   -0.39    0.67
  11   5   1    0.96    0.76
  11   5   1    0.15    0.53
  11   5   1    0.08    0.54
 -12  -5  -1   16.54    1.67
  12   5   1   19.20    1.79
  12   5   1   15.11    1.34
  12   5   1   18.35    1.75
 -13  -5  -1   12.59    1.66
  13   5   1   12.61    1.60
  13   5   1   10.86    1.26
  13   5   1   12.45    1.59
  -8   6   1    3.24    1.02
   7  -6  -1   11.62    1.46
   7  -6  -1   14.86    1.47
  -7   6   1   15.19    1.61
   6  -6  -1   24.98    1.88
   6  -6  -1   29.74    2.21
   6  -6  -1   22.51    1.53
   6  -6  -1   22.96    1.52
   6  -6  -1   22.28    1.56
   6  -6  -1   25.30    1.58
   6  -6  -1   23.11    1.60
  -6   6   1   23.55    1.69
   5  -6  -1    1.47    0.55
   5  -6  -1    1.00    0.58
   5  -6  -1    0.33    0.54
   5  -6  -1    0.83    0.62
   5  -6  -1    1.31    0.64
   5  -6  -1    0.36    0.55
   5  -6  -1    1.11    0.60
  -5   6   1    0.25    0.62
   4  -6  -1   17.41    1.21
   4  -6  -1   17.18    1.29
   4  -6  -1   15.76    1.19
   4  -6  -1   16.98    1.07
   4  -6  -1   15.27    1.34
  -4   6   1   13.84    1.24
   3  -6  -1    3.32    0.57
   3  -6  -1    3.46    0.35
   3  -6  -1    2.34    0.32
   3  -6  -1    3.68    0.68
   3  -6  -1    1.87    0.67
   3  -6  -1    3.25    0.71
   3  -6  -1    3.29    0.67
  -3   6   1    3.27    0.70
   2  -6  -1    1.62    0.30
   2  -6  -1    1.27    0.29
   2  -6  -1    1.73    0.39
   2  -6  -1    1.07    0.52
   2  -6  -1    1.62    0.56
   2  -6  -1    1.16    0.48
  -2   6   1    1.34    0.52
   1  -6  -1   21.85    1.16
   1  -6  -1   22.31    0.86
   1  -6  -1   21.96    1.25
   1  -6  -1   23.77    0.88
   1  -6  -1   22.70    1.10
   1  -6  -1   23.25    0.90
   1  -6  -1   20.79    0.88
   0  -6  -1   10.02    0.93
   0  -6  -1   11.01    0.83
   0  -6  -1    9.39    0.66
   0  -6  -1    8.87    0.61
   0  -6  -1    9.12    0.44
   0  -6  -1   10.26    0.64
   0  -6  -1   10.24    0.73
  -1  -6  -1   63.41    1.89
  -1  -6  -1   60.96    1.85
  -1  -6  -1   65.97    1.92
  -1  -6  -1   59.83    2.06
  -1  -6  -1   64.55    1.89
  -1  -6  -1   60.71    2.13
   1   6   1   59.74    1.73
   1   6   1   66.18    2.16
  -2  -6  -1  151.96    3.89
  -2  -6  -1  151.40    3.85
  -2  -6  -1  147.94    4.05
  -2  -6  -1  147.71    4.08
  -2  -6  -1  146.68    4.32
  -2  -6  -1  150.20    3.91
   2   6   1  154.26    3.83
   2   6   1  150.23    4.06
  -3  -6  -1    6.43    0.66
  -3  -6  -1    6.16    0.61
  -3  -6  -1    6.39    0.71
  -3  -6  -1    7.06    0.64
  -3  -6  -1    6.02    0.61
   3   6   1    6.94    0.61
   3   6   1    7.07    0.69
   3   6   1    6.26    0.59
   3   6   1    6.95    0.73
  -4  -6  -1   21.40    1.04
  -4  -6  -1   16.84    1.01
  -4  -6  -1   20.59    1.07
  -4  -6  -1   21.60    1.02
  -4  -6  -1   19.30    1.01
   4   6   1   18.28    0.96
   4   6   1   20.19    1.00
   4   6   1   18.56    0.99
   4   6   1   19.61    1.08
  -5  -6  -1   15.30    0.97
  -5  -6  -1   15.11    0.94
  -5  -6  -1   14.72    1.00
  -5  -6  -1   15.88    0.92
  -5  -6  -1   15.77    0.96
   5   6   1   15.08    1.00
   5   6   1   14.75    0.94
   5   6   1   15.81    0.93
   5   6   1   14.03    0.92
  -6  -6  -1    1.32    0.49
  -6  -6  -1    1.17    0.58
  -6  -6  -1    0.83    0.43
  -6  -6  -1    1.29    0.43
  -6  -6  -1    2.16    0.50
  -6  -6  -1    0.49    0.26
  -6  -6  -1    0.19    0.35
   6   6   1    1.43    0.46
   6   6   1    1.40    0.45
   6   6   1    0.84    0.42
   6   6   1    0.70    0.52
  -7  -6  -1   13.43    1.03
  -7  -6  -1   12.04    0.93
  -7  -6  -1   12.83    1.06
  -7  -6  -1   12.74    0.87
  -7  -6  -1   11.40    1.06
   7   6   1   12.61    0.92
   7   6   1   11.91    1.00
   7   6   1   13.93    1.09
   7   6   1   12.79    0.97
  -8  -6  -1   16.06    1.23
  -8  -6  -1   17.95    0.99
  -8  -6  -1   15.76    1.22
  -8  -6  -1   18.89    1.23
  -8  -6  -1   16.13    1.09
   8   6   1   15.17    1.22
   8   6   1   15.49    0.99
   8   6   1   17.19    1.14
   8   6   1   16.30    1.24
  -9  -6  -1    2.25    0.71
  -9  -6  -1    2.77    0.58
  -9  -6  -1    1.95    0.63
   9   6   1    2.57    0.63
   9   6   1    3.51    0.80
   9   6   1    1.73    0.53
   9   6   1    1.97    0.61
 -10  -6  -1   33.09    1.82
 -10  -6  -1   33.68    1.50
 -10  -6  -1   28.78    1.69
  10   6   1   31.39    1.66
  10   6   1   29.82    1.76
  10   6   1   29.98    1.64
 -11  -6  -1    7.42    1.18
 -11  -6  -1    8.80    1.25
  11   6   1    7.86    1.03
  11   6   1    7.69    1.16
  11   6   1    7.39    1.19
  11   6   1    7.26    0.99
 -12  -6  -1    6.98    1.29
 -12  -6  -1    5.56    1.13
  12   6   1    6.53    1.15
  12   6   1    6.04    0.97
  12   6   1    6.31    1.15
  12   6   1    4.88    0.91
 -13  -6  -1    2.07    0.99
  13   6   1    3.19    1.02
  13   6   1    1.02    0.75
  13   6   1    0.53    0.83
  -7   7   1    0.62    0.86
   6  -7  -1    0.34    0.73
   6  -7  -1    1.28    0.72
   6  -7  -1    0.86    0.77
   6  -7  -1    1.20    0.75
  -6   7   1    0.10    0.74
   5  -7  -1    0.92    0.70
   5  -7  -1    2.19    0.76
   5  -7  -1    0.50    0.65
   5  -7  -1    1.09    0.77
   5  -7  -1    1.82    0.74
  -5   7   1    1.15    0.73
   4  -7  -1   17.72    1.34
   4  -7  -1   18.23    1.44
   4  -7  -1   18.62    1.45
   4  -7  -1   17.01    0.67
  -4   7   1   17.66    1.51
   3  -7  -1   61.39    1.78
   3  -7  -1   63.07    2.39
   3  -7  -1   63.41    2.39
   3  -7  -1   65.74    2.53
   3  -7  -1   65.71    2.61
   3  -7  -1   63.36    1.78
  -3   7   1   64.96    2.51
   2  -7  -1    5.31    0.90
   2  -7  -1    6.44    0.91
   2  -7  -1    6.19    0.84
   2  -7  -1    5.39    0.74
   2  -7  -1    5.18    0.51
   2  -7  -1    4.73    0.50
   1  -7  -1   17.39    1.25
   1  -7  -1   16.77    1.02
   1  -7  -1   18.84    1.18
   1  -7  -1   17.34    0.85
   1  -7  -1   16.98    0.84
   0  -7  -1   32.30    1.25
   0  -7  -1   31.69    1.59
   0  -7  -1   37.54    1.56
   0  -7  -1   34.64    1.36
   0  -7  -1   31.76    1.22
   0  -7  -1   32.13    1.24
  -1  -7  -1    1.27    0.52
  -1  -7  -1    1.00    0.38
  -1  -7  -1    0.44    0.36
  -1  -7  -1    1.35    0.41
  -1  -7  -1    1.29    0.40
  -1  -7  -1    2.65    0.58
   1   7   1    1.14    0.28
   1   7   1    0.91    0.51
  -2  -7  -1    0.16    0.36
  -2  -7  -1    0.24    0.45
  -2  -7  -1    0.02    0.46
  -2  -7  -1   -0.15    0.33
  -2  -7  -1    0.33    0.34
   2   7   1    0.61    0.32
   2   7   1    1.36    0.50
  -3  -7  -1   15.41    1.03
  -3  -7  -1   15.20    0.85
  -3  -7  -1   12.74    0.91
  -3  -7  -1   15.84    1.05
  -3  -7  -1   15.15    0.92
   3   7   1   13.54    0.85
   3   7   1   15.83    1.03
  -4  -7  -1    3.33    0.61
  -4  -7  -1    2.78    0.50
  -4  -7  -1    2.06    0.53
  -4  -7  -1    2.29    0.50
  -4  -7  -1    2.81    0.52
   4   7   1    2.44    0.53
   4   7   1    3.17    0.62
   4   7   1    2.23    0.25
   4   7   1    2.93    0.51
   4   7   1    2.77    0.48
  -5  -7  -1   42.32    1.67
  -5  -7  -1   47.04    1.69
  -5  -7  -1   46.60    1.83
  -5  -7  -1   45.71    1.74
  -5  -7  -1   42.75    1.69
   5   7   1   43.57    1.69
   5   7   1   43.00    1.68
   5   7   1   47.22    1.72
   5   7   1   43.46    1.81
   5   7   1   42.89    1.35
  -6  -7  -1   25.06    1.31
  -6  -7  -1   24.04    1.25
  -6  -7  -1   25.34    1.30
  -6  -7  -1   25.59    1.35
  -6  -7  -1   26.66    1.05
   6   7   1   26.57    1.41
   6   7   1   25.50    1.31
   6   7   1   26.88    1.30
   6   7   1   24.95    1.28
  -7  -7  -1   27.34    1.35
  -7  -7  -1   26.09    1.48
  -7  -7  -1   25.91    1.01
  -7  -7  -1   26.83    1.31
  -7  -7  -1   26.80    1.37
  -7  -7  -1   29.27    1.48
   7   7   1   29.24    1.43
   7   7   1   27.06    1.32
   7   7   1   27.87    1.50
   7   7   1   27.51    1.38
  -8  -7  -1   21.85    1.33
  -8  -7  -1   21.97    1.38
  -8  -7  -1   19.46    1.20
  -8  -7  -1   20.50    1.38
  -8  -7  -1   20.56    1.17
   8   7   1   20.20    1.29
   8   7   1   19.38    1.27
   8   7   1   19.75    1.18
   8   7   1   19.53    1.41
  -9  -7  -1    7.42    0.99
  -9  -7  -1    5.40    0.80
  -9  -7  -1    7.35    1.05
   9   7   1    5.87    0.93
   9   7   1    6.59    0.87
   9   7   1    5.82    0.84
   9   7   1    6.42    0.80
 -10  -7  -1    0.08    0.50
 -10  -7  -1    1.49    0.69
 -10  -7  -1    0.59    0.64
  10   7   1    1.46    0.66
  10   7   1    0.73    0.59
  10   7   1    0.21    0.55
  10   7   1    0.33    0.72
 -11  -7  -1    8.25    1.18
 -11  -7  -1    8.18    0.94
 -11  -7  -1    9.52    1.29
  11   7   1   11.25    1.38
  11   7   1   10.71    1.19
  11   7   1    9.74    1.24
  11   7   1    8.35    1.10
 -12  -7  -1    0.56    0.81
 -12  -7  -1    0.49    0.79
  12   7   1    0.54    0.63
  12   7   1   -0.55    0.72
  12   7   1   -0.35    0.55
  12   7   1    0.23    0.83
 -13  -7  -1   12.09    1.52
 -13  -7  -1   13.74    1.65
  13   7   1   11.66    1.55
  13   7   1   10.57    1.49
  13   7   1   15.63    1.55
  13   7   1   13.65    1.47
   6  -8  -1   13.33    1.56
   6  -8  -1   10.14    1.40
   6  -8  -1   14.16    1.60
  -6   8   1   10.00    1.49
   5  -8  -1   13.29    1.42
   5  -8  -1   14.82    1.55
   5  -8  -1   14.28    1.60
   5  -8  -1   18.32    1.68
   4  -8  -1    0.45    0.73
   4  -8  -1    2.23    0.80
   4  -8  -1    0.86    0.30
   4  -8  -1    2.03    0.79
   3  -8  -1    0.71    0.75
   3  -8  -1   -0.27    0.62
   3  -8  -1    0.10    0.31
   3  -8  -1    0.31    0.65
   2  -8  -1    9.03    1.16
   2  -8  -1    8.08    1.03
   2  -8  -1    6.34    0.60
   2  -8  -1    8.13    1.14
   1  -8  -1    0.45    0.66
   1  -8  -1    0.46    0.62
   1  -8  -1    1.52    0.63
   1  -8  -1    1.14    0.42
   1  -8  -1    1.35    0.58
   0  -8  -1   10.04    0.79
   0  -8  -1   10.85    0.89
   0  -8  -1   10.55    1.16
   0  -8  -1   10.01    0.79
   0  -8  -1   10.65    1.06
  -1  -8  -1   18.01    1.03
  -1  -8  -1   19.14    1.03
  -1  -8  -1   16.28    0.99
  -1  -8  -1   17.41    1.20
  -1  -8  -1   17.06    1.24
   1   8   1   19.06    0.73
  -2  -8  -1   22.43    1.14
  -2  -8  -1   24.21    1.19
  -2  -8  -1   22.95    1.10
  -2  -8  -1   21.51    1.34
  -2  -8  -1   22.24    1.32
   2   8   1   21.27    0.98
   2   8   1   23.67    1.36
  -3  -8  -1   54.07    1.90
  -3  -8  -1   51.79    2.06
  -3  -8  -1   51.56    2.01
  -3  -8  -1   52.47    1.88
  -3  -8  -1   49.66    1.76
   3   8   1   50.43    1.75
   3   8   1   51.00    2.04
  -4  -8  -1    2.01    0.55
  -4  -8  -1    4.14    0.66
  -4  -8  -1    3.95    0.66
  -4  -8  -1    3.50    0.58
  -4  -8  -1    3.45    0.71
   4   8   1    3.60    0.58
   4   8   1    2.65    0.62
  -5  -8  -1    0.44    0.52
  -5  -8  -1   -0.13    0.53
  -5  -8  -1   -0.30    0.41
  -5  -8  -1    0.55    0.46
  -5  -8  -1    0.22    0.44
   5   8   1    0.56    0.49
   5   8   1    0.18    0.41
   5   8   1   -0.13    0.52
  -6  -8  -1    3.60    0.66
  -6  -8  -1    3.82    0.72
  -6  -8  -1    2.07    0.59
  -6  -8  -1    3.18    0.65
  -6  -8  -1    3.30    0.76
  -6  -8  -1    2.44    0.52
   6   8   1    1.96    0.61
   6   8   1    2.97    0.66
   6   8   1    2.86    0.42
   6   8   1    3.33    0.66
   6   8   1    2.05    0.58
  -7  -8  -1    0.62    0.62
  -7  -8  -1    0.11    0.49
  -7  -8  -1    0.31    0.53
  -7  -8  -1    0.42    0.35
  -7  -8  -1    1.09    0.53
  -7  -8  -1    0.73    0.50
   7   8   1    0.21    0.49
   7   8   1    0.76    0.48
   7   8   1    0.89    0.61
   7   8   1    0.41    0.38
   7   8   1    0.47    0.48
  -8  -8  -1   24.37    1.50
  -8  -8  -1   25.24    1.42
  -8  -8  -1   24.53    1.56
  -8  -8  -1   23.96    1.35
  -8  -8  -1   25.70    1.42
   8   8   1   24.61    1.41
   8   8   1   23.96    1.36
   8   8   1   23.89    1.25
   8   8   1   25.35    1.45
   8   8   1   21.64    1.45
  -9  -8  -1   41.68    1.87
  -9  -8  -1   43.87    2.12
  -9  -8  -1   46.01    2.10
  -9  -8  -1   42.09    1.97
   9   8   1   43.41    1.84
   9   8   1   40.77    2.04
   9   8   1   44.22    1.86
   9   8   1   40.53    1.96
   9   8   1   45.49    2.05
 -10  -8  -1    0.81    0.57
 -10  -8  -1    0.41    0.68
 -10  -8  -1    1.90    0.72
  10   8   1    1.54    0.74
  10   8   1   -0.43    0.52
  10   8   1    0.80    0.61
  10   8   1    0.57    0.57
 -11  -8  -1   16.12    1.34
 -11  -8  -1   15.48    1.48
 -11  -8  -1   14.78    1.51
  11   8   1   16.33    1.71
  11   8   1   16.38    1.49
  11   8   1   16.89    1.50
  11   8   1   15.84    1.44
 -12  -8  -1    2.19    0.73
 -12  -8  -1    1.71    0.84
 -12  -8  -1    1.43    0.92
  12   8   1    2.71    0.81
  12   8   1    3.50    0.92
  12   8   1    2.30    0.81
  12   8   1    3.72    1.09
 -13  -8  -1   -0.93    0.81
 -13  -8  -1    1.99    0.97
  13   8   1   -0.10    0.74
  13   8   1    0.83    0.71
  13   8   1   -0.68    0.89
  13   8   1   -0.10    0.67
   5  -9  -1    9.01    1.39
   5  -9  -1    7.76    1.28
   5  -9  -1   11.81    1.56
   4  -9  -1   13.01    1.67
   4  -9  -1   13.29    0.70
   4  -9  -1   16.04    1.63
   4  -9  -1   13.93    1.65
   3  -9  -1    2.09    0.90
   3  -9  -1    2.13    0.81
   3  -9  -1    1.35    0.42
   3  -9  -1    3.41    0.98
   2  -9  -1   31.38    1.31
   2  -9  -1   32.48    1.91
   2  -9  -1   33.35    2.03
   2  -9  -1   32.54    1.79
   1  -9  -1    6.43    0.67
   1  -9  -1    6.37    1.03
   1  -9  -1    6.05    0.97
   1  -9  -1    5.02    1.05
   0  -9  -1    2.64    0.54
   0  -9  -1    3.08    0.87
   0  -9  -1    3.40    0.80
   0  -9  -1    1.59    0.71
  -1  -9  -1    2.69    0.73
  -1  -9  -1    1.58    0.70
  -1  -9  -1    2.01    0.54
  -1  -9  -1    2.69    0.80
  -1  -9  -1    2.23    0.57
  -2  -9  -1    1.32    0.66
  -2  -9  -1    1.58    0.53
  -2  -9  -1    1.51    0.51
  -2  -9  -1    1.50    0.54
  -2  -9  -1    2.05    0.73
   2   9   1    3.20    0.75
   2   9   1    2.16    0.40
  -3  -9  -1   29.71    1.35
  -3  -9  -1   32.08    1.48
  -3  -9  -1   29.32    1.65
  -3  -9  -1   32.11    1.52
  -3  -9  -1   28.11    1.61
   3   9   1   31.82    1.34
   3   9   1   31.51    1.66
  -4  -9  -1   70.74    2.37
  -4  -9  -1   70.81    2.68
  -4  -9  -1   75.77    2.53
  -4  -9  -1   74.88    2.53
  -4  -9  -1   73.84    2.73
   4   9   1   75.88    2.41
   4   9   1   75.08    2.72
  -5  -9  -1    2.50    0.71
  -5  -9  -1    2.55    0.64
  -5  -9  -1    1.58    0.56
  -5  -9  -1    2.90    0.72
  -5  -9  -1    2.14    0.63
   5   9   1    1.54    0.60
   5   9   1    2.62    0.58
  -6  -9  -1   43.69    1.85
  -6  -9  -1   44.05    2.05
  -6  -9  -1   43.28    1.73
  -6  -9  -1   46.48    1.96
  -6  -9  -1   49.36    1.98
  -6  -9  -1   45.67    2.01
   6   9   1   45.07    1.96
   6   9   1   48.28    1.91
   6   9   1   45.94    2.07
  -7  -9  -1   20.67    1.12
  -7  -9  -1   20.90    1.27
  -7  -9  -1   19.46    1.27
  -7  -9  -1   21.12    1.37
  -7  -9  -1   17.18    1.23
  -7  -9  -1   20.24    1.60
  -7  -9  -1   19.34    1.45
   7   9   1   22.75    1.51
   7   9   1   20.98    1.36
   7   9   1   20.07    1.29
  -8  -9  -1    1.28    0.63
  -8  -9  -1    1.03    0.65
  -8  -9  -1    2.50    0.73
  -8  -9  -1    1.37    0.64
  -8  -9  -1    2.51    0.69
   8   9   1    1.32    0.60
   8   9   1    2.35    0.84
   8   9   1    1.35    0.64
  -9  -9  -1    1.44    0.73
  -9  -9  -1    1.72    0.68
  -9  -9  -1    1.77    0.72
  -9  -9  -1    2.08    0.72
  -9  -9  -1    2.17    0.72
   9   9   1    1.93    0.72
   9   9   1    2.75    0.72
   9   9   1    1.84    0.81
 -10  -9  -1    0.09    0.62
 -10  -9  -1    1.65    0.84
 -10  -9  -1    0.76    0.66
  10   9   1    0.48    0.63
  10   9   1    0.75    0.60
  10   9   1    1.52    0.83
 -11  -9  -1    3.04    0.98
 -11  -9  -1    4.18    0.87
 -11  -9  -1    3.14    0.92
  11   9   1    2.67    0.85
  11   9   1    4.08    1.11
  11   9   1    3.12    1.08
 -12  -9  -1   17.28    1.67
 -12  -9  -1   17.84    1.47
 -12  -9  -1   16.94    1.77
  12   9   1   21.67    1.97
  12   9   1   17.18    1.86
  12   9   1   15.57    1.56
 -13  -9  -1    1.06    0.90
 -13  -9  -1   -0.24    0.91
  13   9   1    1.06    0.80
  13   9   1    0.34    0.97
  13   9   1    0.73    0.76
  13   9   1    1.90    1.29
   4 -10  -1   11.53    1.54
   4 -10  -1   12.19    0.69
   4 -10  -1   10.60    1.51
   4 -10  -1   13.71    1.74
   3 -10  -1    1.18    0.87
   3 -10  -1    0.84    0.98
   3 -10  -1    0.91    0.43
   3 -10  -1    0.51    0.79
   2 -10  -1    6.59    1.26
   2 -10  -1    7.91    1.18
   2 -10  -1    6.52    1.21
   2 -10  -1    4.88    0.65
   1 -10  -1   15.07    1.58
   1 -10  -1   15.46    1.45
   1 -10  -1   18.70    1.70
   1 -10  -1   12.98    1.00
   0 -10  -1    1.77    0.75
   0 -10  -1    2.21    0.53
   0 -10  -1    3.11    0.90
   0 -10  -1    1.68    0.79
  -1 -10  -1   38.82    1.97
  -1 -10  -1   36.97    1.64
  -1 -10  -1   35.90    2.04
  -1 -10  -1   37.28    1.97
  -2 -10  -1   49.81    2.34
  -2 -10  -1   48.39    1.94
  -2 -10  -1   50.39    1.95
  -2 -10  -1   50.63    2.24
  -2 -10  -1   45.62    2.19
   2  10   1   45.48    2.22
  -3 -10  -1    1.92    0.72
  -3 -10  -1    4.05    0.89
  -3 -10  -1    1.52    0.72
  -3 -10  -1    1.18    0.57
  -3 -10  -1    1.01    0.59
   3  10   1    0.85    0.42
   3  10   1    2.23    0.79
  -4 -10  -1   11.11    1.27
  -4 -10  -1   12.20    1.18
  -4 -10  -1   13.23    1.18
  -4 -10  -1   12.92    1.14
  -4 -10  -1    9.13    1.16
  -4 -10  -1   13.13    1.12
   4  10   1   11.86    0.98
   4  10   1   10.03    1.17
  -5 -10  -1    1.01    0.52
  -5 -10  -1    0.50    0.65
  -5 -10  -1    0.37    0.53
  -5 -10  -1    1.31    0.71
  -5 -10  -1    0.58    0.56
  -5 -10  -1    0.95    0.56
   5  10   1    0.52    0.65
   5  10   1   -0.06    0.44
  -6 -10  -1    1.19    0.62
  -6 -10  -1    1.46    0.62
  -6 -10  -1    0.45    0.51
  -6 -10  -1    0.75    0.71
  -6 -10  -1    2.04    0.77
  -6 -10  -1    0.97    0.59
   6  10   1    1.44    0.58
   6  10   1    1.18    0.65
  -7 -10  -1   10.11    1.10
  -7 -10  -1    9.47    1.21
  -7 -10  -1   10.76    1.00
  -7 -10  -1   10.43    1.09
  -7 -10  -1   11.17    1.29
  -7 -10  -1   11.87    1.25
   7  10   1   10.22    1.21
   7  10   1   10.99    1.16
   7  10   1    8.83    1.03
  -8 -10  -1    0.87    0.67
  -8 -10  -1    1.52    0.85
  -8 -10  -1    2.61    0.72
  -8 -10  -1    2.22    0.69
  -8 -10  -1    1.97    0.71
   8  10   1    2.28    0.87
   8  10   1    1.81    0.70
   8  10   1    1.43    0.63
  -9 -10  -1   27.99    1.63
  -9 -10  -1   26.46    1.85
  -9 -10  -1   27.12    1.63
  -9 -10  -1   28.70    1.76
  -9 -10  -1   29.02    1.71
   9  10   1   23.58    1.79
   9  10   1   27.00    1.69
   9  10   1   24.37    1.56
 -10 -10  -1   41.12    2.06
 -10 -10  -1   43.51    2.10
 -10 -10  -1   41.20    2.29
  10  10   1   39.54    1.99
  10  10   1   42.65    2.33
  10  10   1   38.74    2.11
 -11 -10  -1    1.88    0.76
 -11 -10  -1    0.77    0.83
 -11 -10  -1    1.71    0.86
  11  10   1    1.78    1.01
  11  10   1    2.19    0.84
 -12 -10  -1    4.84    1.11
 -12 -10  -1    3.48    1.08
 -12 -10  -1    4.53    0.96
  12  10   1    4.73    1.03
  12  10   1    6.75    1.30
 -13 -10  -1    0.83    0.69
 -13 -10  -1    0.06    0.92
 -13 -10  -1   -1.83    0.82
  13  10   1    1.94    0.90
  13  10   1    1.19    1.04
   3 -11  -1   17.80    1.02
   3 -11  -1   17.62    1.88
   3 -11  -1   14.26    1.84
   2 -11  -1    2.90    1.14
   2 -11  -1    1.56    1.00
   2 -11  -1    1.00    0.50
   2 -11  -1    0.68    0.85
   1 -11  -1   13.64    1.07
   1 -11  -1   14.47    1.64
   1 -11  -1   13.91    1.50
   1 -11  -1   13.13    1.65
   0 -11  -1    1.35    0.89
   0 -11  -1    2.99    1.00
   0 -11  -1    2.28    0.85
   0 -11  -1    1.59    0.60
  -1 -11  -1    0.90    0.85
  -1 -11  -1    1.92    0.88
  -1 -11  -1    1.36    0.84
  -1 -11  -1    2.54    0.68
  -2 -11  -1    0.99    0.78
  -2 -11  -1    0.88    0.87
  -2 -11  -1    1.77    0.66
  -2 -11  -1    0.41    0.77
  -3 -11  -1    0.89    0.62
  -3 -11  -1    0.99    0.78
  -3 -11  -1    1.80    0.75
  -3 -11  -1    1.39    0.64
  -3 -11  -1    2.15    0.87
   3  11   1    3.02    0.89
  -4 -11  -1   20.11    1.46
  -4 -11  -1   19.83    1.40
  -4 -11  -1   21.84    1.46
  -4 -11  -1   21.12    1.60
  -4 -11  -1   17.98    1.67
   4  11   1   20.91    1.21
   4  11   1   19.03    1.66
  -5 -11  -1   28.09    1.87
  -5 -11  -1   30.18    1.71
  -5 -11  -1   30.55    1.72
  -5 -11  -1   28.96    1.69
  -5 -11  -1   32.44    1.92
   5  11   1   31.46    1.84
   5  11   1   29.99    1.54
  -6 -11  -1    1.35    0.65
  -6 -11  -1    1.14    0.67
  -6 -11  -1    1.85    0.82
  -6 -11  -1    0.68    0.63
  -6 -11  -1    0.42    0.76
   6  11   1    1.03    0.58
   6  11   1    0.25    0.70
  -7 -11  -1   17.47    1.57
  -7 -11  -1   22.01    1.35
  -7 -11  -1   25.74    1.70
  -7 -11  -1   18.58    1.42
  -7 -11  -1   19.28    1.83
  -7 -11  -1   21.70    1.40
   7  11   1   20.60    1.77
   7  11   1   21.05    1.43
  -8 -11  -1   18.11    1.51
  -8 -11  -1   18.27    1.81
  -8 -11  -1   18.16    1.31
  -8 -11  -1   18.02    1.60
  -8 -11  -1   20.56    1.53
   8  11   1   16.32    1.47
   8  11   1   15.52    1.59
   8  11   1   18.58    1.42
  -9 -11  -1    1.39    0.87
  -9 -11  -1    0.72    0.71
  -9 -11  -1    0.36    0.62
  -9 -11  -1    1.61    0.78
  -9 -11  -1    0.61    0.63
   9  11   1    2.27    0.74
   9  11   1    0.72    0.64
   9  11   1    0.51    0.82
 -10 -11  -1    1.67    0.97
 -10 -11  -1    1.94    0.82
 -10 -11  -1    2.22    0.91
 -10 -11  -1    1.56    0.77
  10  11   1    3.82    1.06
  10  11   1    2.48    0.78
  10  11   1    2.35    0.84
 -11 -11  -1    5.91    1.03
 -11 -11  -1    4.22    1.11
 -11 -11  -1    3.72    0.99
  11  11   1    4.91    1.24
  11  11   1    3.11    0.95
 -12 -11  -1    4.27    1.10
 -12 -11  -1    3.23    1.16
 -12 -11  -1    1.80    0.84
  12  11   1    4.44    1.24
  12  11   1    3.50    0.97
   2 -12  -1    1.88    1.07
   2 -12  -1    2.20    1.07
   1 -12  -1    5.22    1.28
   1 -12  -1    4.93    1.14
   1 -12  -1    5.31    0.80
   1 -12  -1    3.93    1.17
   0 -12  -1   15.67    1.81
   0 -12  -1   18.03    1.79
   0 -12  -1   17.42    1.28
   0 -12  -1   18.31    1.84
  -1 -12  -1    2.15    1.07
  -1 -12  -1    0.96    0.87
  -1 -12  -1    0.98    0.63
  -1 -12  -1   -0.08    0.80
  -2 -12  -1   23.20    1.52
  -2 -12  -1   23.62    1.97
  -2 -12  -1   23.98    1.93
  -2 -12  -1   25.80    1.82
  -3 -12  -1   19.64    1.78
  -3 -12  -1   18.42    1.69
  -3 -12  -1   14.24    1.68
  -3 -12  -1   19.73    1.43
  -3 -12  -1   17.96    1.44
  -4 -12  -1   -0.10    0.74
  -4 -12  -1   -0.34    0.58
  -4 -12  -1   -0.68    0.80
  -4 -12  -1   -0.16    0.61
  -4 -12  -1    0.13    0.69
   4  12   1   -1.37    0.69
  -5 -12  -1    1.52    0.73
  -5 -12  -1    1.92    0.80
  -5 -12  -1    1.00    0.90
  -5 -12  -1    1.22    0.90
  -5 -12  -1    0.96    0.71
   5  12   1    0.30    0.77
   5  12   1    1.10    0.57
  -6 -12  -1    2.10    0.85
  -6 -12  -1    1.93    0.76
  -6 -12  -1    1.48    0.75
  -6 -12  -1    0.42    0.71
  -6 -12  -1    1.78    0.96
   6  12   1    0.64    0.63
   6  12   1    0.77    0.84
  -7 -12  -1    2.08    0.98
  -7 -12  -1    2.94    0.93
  -7 -12  -1    1.00    0.68
  -7 -12  -1    0.73    0.71
   7  12   1    2.64    0.87
   7  12   1    4.12    0.85
  -8 -12  -1   18.32    1.74
  -8 -12  -1   19.94    1.54
  -8 -12  -1   19.94    1.87
   8  12   1   20.29    1.54
   8  12   1   23.12    2.01
  -9 -12  -1    5.03    1.09
  -9 -12  -1    5.05    1.00
  -9 -12  -1    3.81    1.11
   9  12   1    5.57    0.99
   9  12   1    6.75    1.21
 -10 -12  -1   13.12    1.63
 -10 -12  -1   11.77    1.40
 -10 -12  -1   11.99    1.38
  10  12   1   12.36    1.67
  10  12   1   10.14    1.28
 -11 -12  -1   13.74    1.54
 -11 -12  -1   13.29    1.72
  11  12   1   12.75    1.75
  11  12   1   15.49    1.60
 -12 -12  -1    1.36    1.12
 -12 -12  -1    0.13    0.68
  12  12   1    1.50    1.05
  12  12   1   -0.34    0.77
   0 -13  -1    1.93    1.10
   0 -13  -1    1.33    0.70
   0 -13  -1    2.99    1.12
   0 -13  -1    2.66    1.26
  -1 -13  -1    0.18    0.66
  -1 -13  -1    1.92    1.00
  -1 -13  -1    2.80    1.11
  -1 -13  -1    2.35    1.13
  -2 -13  -1    1.99    0.95
  -2 -13  -1    0.53    1.03
  -2 -13  -1    1.12    0.95
  -2 -13  -1    0.90    0.64
  -3 -13  -1   12.78    1.32
  -3 -13  -1   13.02    1.57
  -3 -13  -1   14.59    1.82
  -3 -13  -1   13.14    1.57
  -4 -13  -1    7.26    1.12
  -4 -13  -1    7.00    1.39
  -4 -13  -1    9.14    1.18
  -4 -13  -1    6.74    1.31
  -4 -13  -1    7.75    1.28
   4  13   1    6.36    1.26
  -5 -13  -1    5.85    1.07
  -5 -13  -1    4.43    1.06
  -5 -13  -1    5.68    1.04
  -5 -13  -1    6.01    1.24
  -5 -13  -1    6.63    1.27
   5  13   1    4.21    1.18
  -6 -13  -1   21.34    1.78
  -6 -13  -1   23.00    1.83
  -6 -13  -1   20.56    1.92
  -6 -13  -1   22.20    1.82
  -6 -13  -1   23.73    2.07
   6  13   1   22.18    2.05
   6  13   1   22.77    1.48
  -7 -13  -1    0.53    0.92
  -7 -13  -1   -0.97    0.84
  -7 -13  -1   -0.21    0.67
   7  13   1    0.31    0.90
   7  13   1    0.00    0.61
  -8 -13  -1   11.31    1.41
  -8 -13  -1    8.71    1.40
  -8 -13  -1    8.30    1.37
   8  13   1   10.08    1.47
   8  13   1    7.35    1.10
  -9 -13  -1   -0.97    0.64
  -9 -13  -1    1.05    0.90
  -9 -13  -1    0.74    1.00
   9  13   1    0.60    0.73
   9  13   1   -0.53    0.94
 -10 -13  -1    0.73    0.74
 -10 -13  -1    0.22    0.97
  10  13   1   -0.11    0.95
  10  13   1    0.82    0.77
 -11 -13  -1    6.18    1.38
 -11 -13  -1    6.41    1.19
  11  13   1    5.89    1.43
  11  13   1    5.73    1.20
  -3 -14  -1    6.53    1.47
  -3 -14  -1    6.95    1.37
  -3 -14  -1    7.77    1.20
  -3 -14  -1    8.40    1.44
  -4 -14  -1    1.49    1.01
  -4 -14  -1    1.23    0.83
  -4 -14  -1    1.77    1.01
  -4 -14  -1    1.45    1.14
  -5 -14  -1   -0.87    0.90
  -5 -14  -1   -0.89    0.92
  -5 -14  -1    1.30    0.92
  -5 -14  -1   -0.36    0.70
  -5 -14  -1   -0.35    0.73
   5  14   1    1.81    1.07
  -6 -14  -1    0.92    1.03
  -6 -14  -1    0.69    0.87
  -6 -14  -1    2.49    1.06
  -6 -14  -1    0.55    0.81
  -6 -14  -1    1.20    0.85
   6  14   1    2.81    1.10
  -7 -14  -1    4.87    1.31
  -7 -14  -1    8.34    1.27
  -7 -14  -1    3.87    1.28
   7  14   1    5.95    1.03
   7  14   1    5.84    1.27
  -8 -14  -1    2.39    1.06
  -8 -14  -1    3.00    1.19
  -8 -14  -1    1.03    0.87
   8  14   1    0.83    1.08
   8  14   1    1.47    0.83
  -9 -14  -1   23.55    2.12
  -9 -14  -1   28.59    1.99
  -9 -14  -1   24.80    2.31
   9  14   1   22.65    2.19
   9  14   1   23.73    1.80
   9  14  -2    0.87    0.76
   9  14  -2    0.51    1.05
  -9 -14   2    3.31    1.12
  -9 -14   2    0.84    1.05
  -9 -14   2    0.39    0.84
   8  14  -2   -1.09    0.87
   8  14  -2    1.46    0.82
  -8 -14   2    1.22    1.09
  -8 -14   2    0.83    1.03
  -8 -14   2    0.12    0.79
   7  14  -2    0.92    1.01
   7  14  -2   -1.13    0.58
  -7 -14   2    0.87    1.02
  -7 -14   2   -0.76    0.91
  -7 -14   2    0.98    0.82
   6  14  -2   -0.43    0.91
  -6 -14   2    0.00    0.85
  -6 -14   2    1.51    1.03
  -6 -14   2    1.21    0.85
  -6 -14   2    0.60    0.99
  -6 -14   2    1.12    0.82
   5  14  -2   16.74    1.91
  -5 -14   2   16.66    1.86
  -5 -14   2   17.28    1.81
  -5 -14   2   19.81    2.05
  -5 -14   2   18.79    1.74
  -5 -14   2   14.95    1.55
  -4 -14   2    6.75    1.15
  -4 -14   2    2.87    1.11
  -4 -14   2    4.35    1.16
  -4 -14   2    4.27    1.31
  -3 -14   2   10.91    1.65
  -3 -14   2   10.06    1.52
  -3 -14   2   13.04    1.45
  -3 -14   2    9.86    1.56
  11  13  -2    1.15    1.08
  11  13  -2   -0.14    0.80
 -11 -13   2    1.64    1.21
 -11 -13   2    1.13    0.88
  10  13  -2    7.79    1.45
  10  13  -2   11.70    1.40
 -10 -13   2    9.02    1.52
 -10 -13   2    6.41    1.17
   9  13  -2    3.83    1.28
   9  13  -2    3.09    0.92
  -9 -13   2    5.97    1.26
  -9 -13   2    6.02    1.29
  -9 -13   2    3.59    0.96
   8  13  -2   13.06    1.76
   8  13  -2   14.38    1.45
  -8 -13   2   13.80    1.65
  -8 -13   2   15.61    1.82
  -8 -13   2   12.52    1.46
   7  13  -2   22.41    2.10
   7  13  -2   25.94    1.67
  -7 -13   2   24.93    1.98
  -7 -13   2   22.13    1.86
  -7 -13   2   26.13    1.99
   6  13  -2    2.55    0.73
   6  13  -2    1.78    1.01
  -6 -13   2    4.44    0.98
  -6 -13   2    5.50    1.22
  -6 -13   2    2.37    1.04
  -6 -13   2    2.42    0.87
  -6 -13   2    3.00    0.90
   5  13  -2    5.15    1.26
  -5 -13   2    5.59    1.11
  -5 -13   2    6.65    1.31
  -5 -13   2    5.51    1.24
  -5 -13   2    6.04    1.06
  -5 -13   2    6.28    1.06
   4  13  -2    1.73    1.03
  -4 -13   2    1.94    1.01
  -4 -13   2    3.61    1.12
  -4 -13   2    1.89    0.86
  -4 -13   2    1.51    0.78
  -4 -13   2    0.03    0.76
  -3 -13   2    0.68    0.94
  -3 -13   2   -0.23    0.84
  -3 -13   2   -0.68    0.80
  -3 -13   2   -0.66    0.58
  -2 -13   2    6.92    1.09
  -2 -13   2    6.57    1.45
  -2 -13   2    5.67    1.23
  -2 -13   2    6.78    1.35
  -1 -13   2    5.33    1.18
  -1 -13   2    8.13    1.42
  -1 -13   2    7.67    1.52
  -1 -13   2    6.10    1.00
   0 -13   2    4.83    1.30
   0 -13   2    2.01    1.27
   0 -13   2    3.29    0.78
  12  12  -2   20.75    1.92
  12  12  -2   20.95    2.20
 -12 -12   2   18.67    1.75
 -12 -12   2   20.04    2.11
  11  12  -2    0.75    0.74
  11  12  -2    0.05    0.90
 -11 -12   2    1.73    1.06
 -11 -12   2    1.50    0.80
  10  12  -2    6.48    1.15
  10  12  -2    6.86    1.37
 -10 -12   2    9.38    1.48
 -10 -12   2    7.20    1.16
   9  12  -2    7.80    1.42
   9  12  -2    6.28    1.06
  -9 -12   2    4.93    1.23
  -9 -12   2    9.59    1.35
  -9 -12   2    6.82    1.12
   8  12  -2    1.40    0.91
   8  12  -2    0.72    0.66
  -8 -12   2    1.56    0.74
  -8 -12   2   -0.49    0.84
  -8 -12   2    0.42    0.74
   7  12  -2    2.45    0.93
   7  12  -2    0.84    0.67
  -7 -12   2    2.33    0.98
  -7 -12   2    2.71    0.83
  -7 -12   2    2.75    0.98
   6  12  -2   10.92    1.47
   6  12  -2    9.80    1.07
  -6 -12   2    9.76    1.42
  -6 -12   2   10.42    1.22
  -6 -12   2   11.72    1.30
  -6 -12   2   10.71    1.45
  -6 -12   2   10.67    1.20
   5  12  -2    0.38    0.53
   5  12  -2    1.32    0.88
  -5 -12   2    0.99    0.85
  -5 -12   2    1.00    0.69
  -5 -12   2    1.38    0.88
  -5 -12   2    0.31    0.70
  -5 -12   2    1.21    0.74
   4  12  -2   27.16    2.00
  -4 -12   2   26.49    1.77
  -4 -12   2   30.14    2.02
  -4 -12   2   26.92    1.70
  -4 -12   2   27.33    1.67
  -4 -12   2   29.03    1.90
  -3 -12   2    6.30    1.13
  -3 -12   2    7.26    1.27
  -3 -12   2    5.83    0.94
  -3 -12   2    6.40    0.96
  -3 -12   2    5.87    1.08
  -2 -12   2    7.55    1.27
  -2 -12   2    7.52    1.20
  -2 -12   2    7.82    1.41
  -2 -12   2    8.39    1.07
  -1 -12   2    5.16    0.86
  -1 -12   2    8.07    1.43
  -1 -12   2    6.06    1.15
  -1 -12   2    4.81    1.13
   0 -12   2    1.45    0.61
   0 -12   2   -0.01    0.97
   0 -12   2    1.99    1.04
   0 -12   2   -0.15    0.77
   1 -12   2    1.67    1.07
   1 -12   2    0.22    0.88
   1 -12   2    0.55    0.57
   2 -12   2    3.20    1.20
   2 -12   2    3.14    1.29
  12  11  -2    0.21    0.81
  12  11  -2    0.75    0.98
 -12 -11   2    0.25    0.71
 -12 -11   2   -0.39    0.89
  11  11  -2    5.09    1.04
  11  11  -2    2.79    1.04
 -11 -11   2    3.81    1.17
 -11 -11   2    2.26    0.84
  10  11  -2    0.68    0.91
  10  11  -2   -0.45    0.64
 -10 -11   2    0.74    0.88
 -10 -11   2    1.06    0.74
   9  11  -2   24.20    1.89
   9  11  -2   22.99    1.59
  -9 -11   2   25.39    1.64
  -9 -11   2   23.64    1.85
  -9 -11   2   23.29    1.63
  -9 -11   2   25.59    1.80
   8  11  -2   14.76    1.58
   8  11  -2   11.10    1.24
  -8 -11   2   14.70    1.58
  -8 -11   2   11.25    1.37
  -8 -11   2   13.28    1.39
  -8 -11   2   14.90    1.41
   7  11  -2    6.17    1.18
   7  11  -2    3.43    0.77
  -7 -11   2    4.41    1.02
  -7 -11   2    4.21    1.19
  -7 -11   2    3.74    1.00
  -7 -11   2    4.70    0.90
   6  11  -2   21.62    1.67
   6  11  -2   17.48    1.34
  -6 -11   2   21.75    1.52
  -6 -11   2   18.71    1.67
  -6 -11   2   20.24    1.52
  -6 -11   2   20.72    1.52
  -6 -11   2   18.56    1.34
   5  11  -2    2.47    0.64
   5  11  -2    2.38    0.89
  -5 -11   2    2.34    0.86
  -5 -11   2    3.80    0.94
  -5 -11   2    2.38    0.72
  -5 -11   2    2.86    0.72
  -5 -11   2    1.42    0.71
   4  11  -2    0.51    0.50
   4  11  -2    0.83    0.72
  -4 -11   2    1.09    0.60
  -4 -11   2    0.91    0.64
  -4 -11   2    0.25    0.73
  -4 -11   2    0.16    0.72
  -4 -11   2    0.75    0.67
   3  11  -2    7.49    1.20
  -3 -11   2    7.87    0.98
  -3 -11   2    6.30    1.05
  -3 -11   2    6.29    1.14
  -3 -11   2    6.40    0.91
  -3 -11   2    6.04    1.09
  -2 -11   2    1.23    0.69
  -2 -11   2    0.65    0.75
  -2 -11   2    2.05    0.81
  -2 -11   2    1.74    0.63
  -2 -11   2    2.02    0.88
  -1 -11   2   21.89    1.35
  -1 -11   2   18.38    1.77
  -1 -11   2   19.64    1.64
  -1 -11   2   17.27    1.64
   0 -11   2   26.01    1.42
   0 -11   2   27.54    1.96
   0 -11   2   24.83    1.78
   0 -11   2   25.89    1.94
   1 -11   2    0.84    0.84
   1 -11   2    2.03    0.92
   1 -11   2    0.14    0.45
   1 -11   2    1.06    0.95
   2 -11   2   10.94    1.52
   2 -11   2    9.53    0.92
   2 -11   2   10.68    1.51
   3 -11   2    5.95    0.70
   3 -11   2    6.23    1.34
   3 -11   2    5.50    1.29
  13  10  -2    4.37    1.31
  13  10  -2    7.16    1.22
 -13 -10   2    5.66    1.23
 -13 -10   2    6.24    1.32
 -13 -10   2    4.50    1.17
  12  10  -2    7.52    1.41
  12  10  -2    7.46    1.22
 -12 -10   2    6.99    1.18
 -12 -10   2    6.22    1.02
 -12 -10   2    7.76    1.38
  11  10  -2   34.25    1.98
  11  10  -2   32.00    2.14
 -11 -10   2   27.13    2.08
 -11 -10   2   29.86    1.84
 -11 -10   2   31.36    1.94
  10  10  -2    6.81    1.26
  10  10  -2    6.03    1.03
 -10 -10   2    6.78    1.03
 -10 -10   2    8.25    1.11
 -10 -10   2    5.94    1.11
   9  10  -2    2.29    0.74
   9  10  -2    1.74    0.83
   9  10  -2    3.06    0.74
  -9 -10   2    1.23    0.64
  -9 -10   2    1.81    0.77
  -9 -10   2    2.24    0.91
  -9 -10   2    1.21    0.68
   8  10  -2   -0.44    0.72
   8  10  -2   -0.52    0.52
   8  10  -2   -0.12    0.54
  -8 -10   2   -0.47    0.47
  -8 -10   2    0.51    0.68
  -8 -10   2   -0.23    0.70
  -8 -10   2    0.00    0.61
  -8 -10   2   -0.76    0.50
   7  10  -2    1.10    0.61
   7  10  -2    0.52    0.71
  -7 -10   2    0.46    0.54
  -7 -10   2    0.41    0.67
  -7 -10   2    1.05    0.61
  -7 -10   2    0.08    0.49
  -7 -10   2    0.49    0.69
  -7 -10   2    0.61    0.54
   6  10  -2   32.94    1.86
   6  10  -2   27.67    1.51
  -6 -10   2   29.06    1.73
  -6 -10   2   30.36    1.55
  -6 -10   2   29.29    1.48
  -6 -10   2   32.23    1.83
  -6 -10   2   26.75    1.58
  -6 -10   2   27.09    1.57
   5  10  -2   36.53    1.66
   5  10  -2   37.13    1.96
  -5 -10   2   35.60    1.79
  -5 -10   2   37.29    1.94
  -5 -10   2   38.20    1.78
  -5 -10   2   35.18    1.73
  -5 -10   2   35.73    1.92
   4  10  -2    1.50    0.73
   4  10  -2    1.05    0.47
  -4 -10   2    0.88    0.54
  -4 -10   2    1.45    0.64
  -4 -10   2    1.62    0.73
  -4 -10   2    1.16    0.61
  -4 -10   2    1.34    0.73
   3  10  -2   52.88    2.40
   3  10  -2   51.43    1.83
  -3 -10   2   53.11    2.29
  -3 -10   2   57.33    2.32
  -3 -10   2   49.09    2.38
  -3 -10   2   50.34    2.08
  -3 -10   2   52.28    2.06
  -2 -10   2   19.74    1.46
  -2 -10   2   20.10    1.27
  -2 -10   2   20.61    1.56
  -2 -10   2   20.74    1.52
  -2 -10   2   17.92    1.23
  -1 -10   2    1.95    0.77
  -1 -10   2    1.35    0.54
  -1 -10   2    0.79    0.67
  -1 -10   2    0.70    0.72
   0 -10   2    0.44    0.47
   0 -10   2    0.15    0.75
   0 -10   2    0.60    0.68
   0 -10   2    0.32    0.70
   1 -10   2    0.47    0.46
   1 -10   2   -0.72    0.63
   1 -10   2   -0.14    0.70
   1 -10   2    1.06    0.83
   2 -10   2    8.81    1.31
   2 -10   2    7.43    1.14
   2 -10   2    8.18    0.79
   2 -10   2    7.95    1.25
   3 -10   2   21.02    1.96
   3 -10   2   18.41    1.02
   3 -10   2   19.00    1.88
   4 -10   2    2.17    0.99
   4 -10   2    2.55    1.06
   4 -10   2    1.02    0.92
   4 -10   2    0.85    0.37
  13   9  -2    5.09    1.19
  13   9  -2    4.39    1.23
  13   9  -2    3.28    0.95
 -13  -9   2    5.41    1.30
 -13  -9   2    3.60    1.11
  12   9  -2    0.25    0.86
  12   9  -2    1.33    0.79
 -12  -9   2    0.84    0.68
 -12  -9   2   -0.27    0.76
 -12  -9   2    1.77    1.00
  11   9  -2    3.06    0.98
  11   9  -2    5.20    0.96
 -11  -9   2    3.70    0.96
 -11  -9   2    3.71    1.03
 -11  -9   2    3.66    0.83
  10   9  -2   12.50    1.31
  10   9  -2    9.61    1.29
 -10  -9   2   13.82    1.33
 -10  -9   2   13.25    1.51
 -10  -9   2   11.35    1.16
   9   9  -2    0.82    0.54
   9   9  -2    1.38    0.76
   9   9  -2    0.79    0.62
  -9  -9   2    0.51    0.57
  -9  -9   2   -0.04    0.69
  -9  -9   2   -0.12    0.54
  -9  -9   2   -0.06    0.59
   8   9  -2   51.45    2.36
   8   9  -2   52.88    2.21
   8   9  -2   51.84    2.08
  -8  -9   2   50.65    2.06
  -8  -9   2   50.45    2.15
  -8  -9   2   50.17    2.16
  -8  -9   2   47.62    2.29
  -8  -9   2   50.85    2.18
   7   9  -2   26.27    1.65
   7   9  -2   28.90    1.50
   7   9  -2   28.57    1.54
  -7  -9   2   26.02    1.56
  -7  -9   2   25.21    1.46
  -7  -9   2   24.68    1.33
  -7  -9   2   28.61    1.50
  -7  -9   2   26.83    1.67
  -7  -9   2   27.51    1.41
   6   9  -2    2.70    0.64
   6   9  -2    3.08    0.72
  -6  -9   2    2.72    0.75
  -6  -9   2    2.99    0.68
  -6  -9   2    2.28    0.64
  -6  -9   2    2.73    0.79
  -6  -9   2    2.99    0.69
  -6  -9   2    2.86    0.59
   5   9  -2   10.20    0.97
   5   9  -2    9.44    1.10
  -5  -9   2   10.28    1.02
  -5  -9   2   10.38    1.12
  -5  -9   2   10.80    1.02
  -5  -9   2    9.50    0.94
  -5  -9   2   10.98    0.96
  -5  -9   2    9.64    1.08
   4   9  -2    0.45    0.42
   4   9  -2    0.31    0.64
  -4  -9   2    0.51    0.43
  -4  -9   2    0.25    0.47
  -4  -9   2    0.99    0.53
  -4  -9   2    1.15    0.66
  -4  -9   2    0.78    0.55
  -4  -9   2   -0.04    0.45
   3   9  -2    0.32    0.59
   3   9  -2    0.44    0.39
  -3  -9   2    0.81    0.57
  -3  -9   2    0.95    0.50
  -3  -9   2    0.49    0.64
  -3  -9   2    0.04    0.45
  -3  -9   2    0.44    0.46
  -3  -9   2    0.19    0.59
   2   9  -2   35.34    1.28
   2   9  -2   32.78    1.80
  -2  -9   2   32.20    1.68
  -2  -9   2   32.14    1.77
  -2  -9   2   31.37    1.69
  -2  -9   2   33.95    1.48
  -2  -9   2   32.13    1.51
  -1  -9   2    0.79    0.49
  -1  -9   2   -0.11    0.42
  -1  -9   2    1.24    0.69
  -1  -9   2    0.75    0.60
  -1  -9   2   -0.20    0.55
   0  -9   2   26.29    1.68
   0  -9   2   30.42    1.76
   0  -9   2   25.70    1.27
   0  -9   2   26.41    1.56
   1  -9   2   36.46    2.01
   1  -9   2   38.37    1.49
   1  -9   2   34.83    1.94
   1  -9   2   35.47    1.85
   2  -9   2    1.80    0.75
   2  -9   2    2.14    0.86
   2  -9   2    1.19    0.43
   2  -9   2    2.45    0.83
   3  -9   2    8.88    1.30
   3  -9   2    7.54    0.66
   3  -9   2    9.20    1.29
   3  -9   2    9.77    1.20
   4  -9   2    0.55    0.80
   4  -9   2    1.30    0.88
   4  -9   2   -0.65    0.76
   4  -9   2    0.59    0.36
   5  -9   2    1.47    0.89
   5  -9   2    1.85    0.99
   5  -9   2    1.19    0.91
   5  -9   2    1.29    0.94
  13   8  -2   24.36    1.81
  13   8  -2   20.22    2.04
  13   8  -2   21.10    1.95
  13   8  -2   19.89    1.81
 -13  -8   2   22.20    2.07
 -13  -8   2   22.12    1.99
  12   8  -2   15.93    1.56
  12   8  -2   15.66    1.73
  12   8  -2   13.83    1.40
  12   8  -2   15.11    1.52
 -12  -8   2   15.97    1.62
 -12  -8   2   12.96    1.59
  11   8  -2    4.36    0.89
  11   8  -2    2.48    0.77
  11   8  -2    4.48    0.94
  11   8  -2    3.75    1.00
 -11  -8   2    4.66    0.97
 -11  -8   2    2.54    0.72
 -11  -8   2    3.56    0.99
  10   8  -2   21.96    1.64
  10   8  -2   23.12    1.55
  10   8  -2   19.64    1.38
  10   8  -2   21.40    1.51
 -10  -8   2   23.94    1.70
 -10  -8   2   20.55    1.39
 -10  -8   2   22.13    1.53
   9   8  -2    1.33    0.75
   9   8  -2   -0.11    0.47
   9   8  -2    0.03    0.50
   9   8  -2    0.77    0.56
   9   8  -2    1.01    0.54
  -9  -8   2    1.14    0.57
  -9  -8   2    1.09    0.61
  -9  -8   2    1.12    0.55
  -9  -8   2   -0.51    0.62
   8   8  -2   -0.18    0.47
   8   8  -2    0.50    0.66
   8   8  -2    0.32    0.50
   8   8  -2    0.41    0.47
   8   8  -2   -0.41    0.42
  -8  -8   2    0.32    0.54
  -8  -8   2   -0.04    0.46
  -8  -8   2   -0.28    0.53
  -8  -8   2   -0.07    0.49
  -8  -8   2    0.80    0.62
   7   8  -2    0.40    0.46
   7   8  -2    0.03    0.55
   7   8  -2    0.43    0.46
   7   8  -2    0.57    0.38
   7   8  -2    0.13    0.47
  -7  -8   2    0.78    0.49
  -7  -8   2    0.95    0.55
  -7  -8   2    0.32    0.49
  -7  -8   2    0.24    0.50
  -7  -8   2    0.38    0.52
  -7  -8   2    0.75    0.62
   6   8  -2    0.28    0.57
   6   8  -2    0.08    0.47
   6   8  -2    0.61    0.47
   6   8  -2    1.16    0.59
   6   8  -2    0.26    0.28
  -6  -8   2    0.53    0.53
  -6  -8   2    0.37    0.50
  -6  -8   2    0.83    0.51
  -6  -8   2    0.26    0.39
  -6  -8   2   -0.18    0.41
  -6  -8   2    0.99    0.52
  -6  -8   2    0.70    0.44
   5   8  -2   30.74    1.56
   5   8  -2   30.87    1.42
  -5  -8   2   27.77    1.43
  -5  -8   2   28.88    1.32
  -5  -8   2   27.59    1.39
  -5  -8   2   29.19    1.31
  -5  -8   2   30.26    1.54
  -5  -8   2   30.34    1.52
   4   8  -2   64.96    2.38
   4   8  -2   62.60    2.11
  -4  -8   2   63.75    2.21
  -4  -8   2   63.34    2.17
  -4  -8   2   64.30    2.04
  -4  -8   2   63.20    2.37
  -4  -8   2   59.93    2.28
  -4  -8   2   63.31    2.19
   3   8  -2    1.27    0.41
   3   8  -2    0.95    0.54
  -3  -8   2    1.10    0.50
  -3  -8   2    0.94    0.48
  -3  -8   2    0.76    0.37
  -3  -8   2    0.95    0.46
  -3  -8   2    0.75    0.59
  -3  -8   2    2.37    0.63
   2   8  -2   29.02    1.14
   2   8  -2   27.54    1.55
  -2  -8   2   26.48    1.49
  -2  -8   2   29.75    1.17
  -2  -8   2   29.61    1.31
  -2  -8   2   28.01    1.45
  -2  -8   2   27.58    1.31
  -2  -8   2   26.27    1.40
   1   8  -2   14.55    0.67
  -1  -8   2   13.07    0.82
  -1  -8   2   13.95    0.91
  -1  -8   2   16.18    0.96
  -1  -8   2   14.59    1.14
  -1  -8   2   13.47    1.14
  -1  -8   2   15.28    1.20
   0  -8   2    0.24    0.54
   0  -8   2    0.33    0.59
   0  -8   2   -0.32    0.48
   0  -8   2    0.06    0.36
   0  -8   2   -0.07    0.35
   1  -8   2    3.49    0.86
   1  -8   2    3.61    0.52
   1  -8   2    3.85    0.80
   1  -8   2    2.87    0.70
   2  -8   2   11.38    1.22
   2  -8   2   12.46    1.15
   2  -8   2   10.45    0.76
   2  -8   2   12.59    1.32
   3  -8   2   12.59    0.75
   3  -8   2   10.90    1.27
   3  -8   2   12.02    1.36
   3  -8   2   12.82    1.21
   4  -8   2   23.36    1.53
   4  -8   2   23.39    0.90
   4  -8   2   20.36    1.77
   4  -8   2   25.27    1.75
   4  -8   2   22.83    1.65
   5  -8   2    3.19    0.92
   5  -8   2    2.09    0.91
   5  -8   2    2.27    0.87
   6  -8   2    3.97    1.07
   6  -8   2    5.18    1.12
   6  -8   2    5.42    1.16
  13   7  -2    0.21    0.85
  13   7  -2    0.47    0.68
  13   7  -2    1.63    1.03
  13   7  -2   -0.08    0.67
 -13  -7   2    0.84    0.91
 -13  -7   2    1.15    0.93
  12   7  -2   -1.05    0.63
  12   7  -2   -0.79    0.77
  12   7  -2   -0.65    0.55
  12   7  -2   -0.40    0.60
 -12  -7   2    0.88    0.85
 -12  -7   2   -0.04    0.77
  11   7  -2    0.50    0.80
  11   7  -2   -0.79    0.54
  11   7  -2    0.11    0.63
  11   7  -2    0.97    0.63
 -11  -7   2    1.60    0.78
 -11  -7   2    0.60    0.75
 -11  -7   2    0.93    0.55
  10   7  -2    3.14    0.92
  10   7  -2    5.12    0.88
  10   7  -2    3.60    0.76
  10   7  -2    4.37    0.82
 -10  -7   2    4.94    0.91
 -10  -7   2    4.08    0.98
 -10  -7   2    3.77    0.71
   9   7  -2   24.02    1.48
   9   7  -2   26.28    1.52
   9   7  -2   23.06    1.28
   9   7  -2   26.72    1.43
   9   7  -2   26.59    1.65
  -9  -7   2   25.03    1.61
  -9  -7   2   23.10    1.47
  -9  -7   2   25.90    1.36
  -9  -7   2   26.52    1.41
   8   7  -2    0.65    0.46
   8   7  -2    0.75    0.46
   8   7  -2    0.07    0.52
   8   7  -2    0.36    0.50
   8   7  -2    0.87    0.55
  -8  -7   2    0.57    0.47
  -8  -7   2   -0.02    0.49
  -8  -7   2   -0.84    0.42
  -8  -7   2   -0.33    0.58
   7   7  -2   52.97    1.82
   7   7  -2   50.27    1.98
   7   7  -2   49.16    2.04
   7   7  -2   49.61    1.98
   7   7  -2   48.89    1.83
  -7  -7   2   53.83    2.06
  -7  -7   2   52.02    1.96
  -7  -7   2   48.46    1.93
  -7  -7   2   51.43    2.11
  -7  -7   2   50.46    1.90
   6   7  -2   40.68    1.43
   6   7  -2   39.66    1.72
   6   7  -2   40.60    1.67
   6   7  -2   38.19    1.64
   6   7  -2   39.85    1.59
  -6  -7   2   38.72    1.76
  -6  -7   2   38.19    1.62
  -6  -7   2   39.52    1.38
  -6  -7   2   42.99    1.65
  -6  -7   2   39.97    1.67
  -6  -7   2   41.20    1.59
  -6  -7   2   40.88    1.68
   5   7  -2    0.92    0.28
   5   7  -2    0.84    0.41
   5   7  -2    0.78    0.41
   5   7  -2    1.16    0.44
   5   7  -2    1.08    0.53
  -5  -7   2    1.10    0.53
  -5  -7   2    1.32    0.47
  -5  -7   2    0.86    0.48
  -5  -7   2    0.92    0.44
  -5  -7   2    0.46    0.46
  -5  -7   2    0.62    0.35
   4   7  -2    0.12    0.42
   4   7  -2    0.17    0.38
   4   7  -2    0.20    0.37
   4   7  -2    0.58    0.19
  -4  -7   2    0.15    0.37
  -4  -7   2    0.68    0.47
  -4  -7   2    0.57    0.43
  -4  -7   2    0.46    0.36
  -4  -7   2    0.82    0.48
  -4  -7   2    0.65    0.37
   3   7  -2    0.75    0.42
   3   7  -2    0.66    0.36
   3   7  -2    1.05    0.34
  -3  -7   2    0.76    0.35
  -3  -7   2    0.67    0.40
  -3  -7   2    0.33    0.40
  -3  -7   2    1.24    0.43
  -3  -7   2    1.55    0.52
  -3  -7   2    1.03    0.50
   2   7  -2   14.59    0.80
   2   7  -2   14.63    1.07
  -2  -7   2   13.05    1.02
  -2  -7   2   16.50    1.03
  -2  -7   2   14.94    0.89
  -2  -7   2   14.58    0.98
  -2  -7   2   14.61    0.92
  -2  -7   2   14.44    0.77
   1   7  -2   85.15    2.27
   1   7  -2   87.85    2.86
  -1  -7   2   84.63    2.37
  -1  -7   2   85.72    2.69
  -1  -7   2   84.32    2.49
  -1  -7   2   84.30    2.73
  -1  -7   2   85.87    2.47
  -1  -7   2   84.65    2.81
   0  -7   2   14.39    0.80
   0  -7   2   12.97    0.98
   0  -7   2   12.52    0.78
   0  -7   2   14.50    1.12
   0  -7   2   13.29    1.15
   0  -7   2   14.39    1.06
   0  -7   2   13.78    0.82
   1  -7   2   19.14    1.16
   1  -7   2   18.00    1.27
   1  -7   2   19.99    1.02
   1  -7   2   20.38    1.01
   1  -7   2   19.54    1.26
   1  -7   2   19.50    0.92
   2  -7   2    9.76    1.05
   2  -7   2    9.33    0.66
   2  -7   2    9.95    0.98
   2  -7   2   12.24    0.91
   2  -7   2   10.01    1.14
   2  -7   2    9.34    0.68
  -3   7  -2    0.62    0.55
   3  -7   2   -0.12    0.62
   3  -7   2    0.24    0.29
   3  -7   2    0.06    0.56
   3  -7   2    0.56    0.54
  -4   7  -2    2.05    0.72
   4  -7   2    2.57    0.82
   4  -7   2    1.77    0.30
   4  -7   2    1.36    0.70
   4  -7   2    1.97    0.67
   4  -7   2    1.65    0.30
  -5   7  -2    0.03    0.66
   5  -7   2    0.70    0.72
   5  -7   2    0.48    0.74
   5  -7   2    0.52    0.66
  -6   7  -2    0.27    0.73
   6  -7   2    0.37    0.70
   6  -7   2    2.00    0.82
   6  -7   2    0.26    0.68
   6  -7   2    2.14    0.81
  -7   7  -2   10.68    1.38
   7  -7   2   13.95    1.60
   7  -7   2   15.13    1.69
  13   6  -2    0.48    0.83
  13   6  -2    0.99    0.95
  13   6  -2    1.04    0.73
 -13  -6   2    1.93    0.93
  12   6  -2   21.71    1.72
  12   6  -2   21.57    1.58
  12   6  -2   21.19    1.53
  12   6  -2   19.49    1.81
 -12  -6   2   23.03    1.79
 -12  -6   2   20.43    1.84
  11   6  -2   13.36    1.32
  11   6  -2   14.41    1.52
  11   6  -2   14.69    1.49
  11   6  -2   12.85    1.26
 -11  -6   2   12.99    1.41
 -11  -6   2   13.25    1.40
  10   6  -2    1.60    0.61
  10   6  -2    1.25    0.73
  10   6  -2    1.29    0.60
  10   6  -2    2.23    0.75
 -10  -6   2    2.57    0.84
 -10  -6   2    0.67    0.71
 -10  -6   2    1.92    0.54
   9   6  -2    4.88    0.88
   9   6  -2    2.89    0.68
   9   6  -2    4.45    0.75
   9   6  -2    5.28    0.84
  -9  -6   2    3.82    0.86
  -9  -6   2    4.51    0.67
  -9  -6   2    4.28    0.81
   8   6  -2    5.19    0.74
   8   6  -2    6.36    0.81
   8   6  -2    4.60    0.87
   8   6  -2    5.63    0.77
   8   6  -2    6.85    0.73
  -8  -6   2    5.31    0.81
  -8  -6   2    4.86    0.70
  -8  -6   2    6.01    0.89
  -8  -6   2    5.15    0.72
   7   6  -2    0.76    0.49
   7   6  -2    1.57    0.43
   7   6  -2    1.10    0.49
   7   6  -2    0.99    0.46
   7   6  -2    0.59    0.47
  -7  -6   2    0.10    0.53
  -7  -6   2    2.15    0.52
  -7  -6   2    0.54    0.45
  -7  -6   2    0.91    0.44
  -7  -6   2    2.25    0.59
   6   6  -2   86.61    2.52
   6   6  -2   84.36    2.75
   6   6  -2   84.39    2.67
   6   6  -2   87.03    2.56
   6   6  -2   90.83    2.73
  -6  -6   2   87.61    2.29
  -6  -6   2   84.60    2.65
  -6  -6   2   84.88    2.66
  -6  -6   2   90.04    2.65
  -6  -6   2   86.74    2.79
  -6  -6   2   86.23    2.69
  -6  -6   2   86.82    2.65
   5   6  -2   46.58    1.64
   5   6  -2   47.82    1.81
   5   6  -2   45.98    1.69
   5   6  -2   44.85    1.48
   5   6  -2   50.23    1.76
  -5  -6   2   47.27    1.73
  -5  -6   2   48.82    1.76
  -5  -6   2   47.75    1.69
  -5  -6   2   45.21    1.78
  -5  -6   2   47.72    1.62
  -5  -6   2   46.83    1.70
  -5  -6   2   48.09    1.50
   4   6  -2   50.42    1.85
   4   6  -2   50.10    1.77
   4   6  -2   52.63    1.77
   4   6  -2   51.44    1.75
   4   6  -2   48.88    1.44
  -4  -6   2   50.78    1.83
  -4  -6   2   52.77    1.80
  -4  -6   2   54.27    1.72
  -4  -6   2   56.50    1.80
  -4  -6   2   49.50    1.81
  -4  -6   2   52.86    1.66
   3   6  -2   39.09    1.42
   3   6  -2   41.10    1.58
   3   6  -2   40.03    1.41
  -3  -6   2   39.09    1.43
  -3  -6   2   39.47    1.56
  -3  -6   2   41.19    1.46
  -3  -6   2   41.30    1.59
  -3  -6   2   37.95    1.46
  -3  -6   2   39.92    1.35
   2   6  -2    0.30    0.30
   2   6  -2    1.35    0.49
  -2  -6   2    0.78    0.34
  -2  -6   2    0.95    0.45
  -2  -6   2    0.51    0.35
  -2  -6   2    0.75    0.30
  -2  -6   2    1.36    0.41
   1   6  -2   12.67    0.97
   1   6  -2   13.18    0.64
  -1  -6   2   12.71    0.87
  -1  -6   2   11.91    0.86
  -1  -6   2   13.47    0.70
  -1  -6   2   11.55    0.72
  -1  -6   2   12.73    0.78
  -1  -6   2   12.49    0.72
   0   6  -2    0.45    0.16
   0  -6   2    0.11    0.17
   0  -6   2    0.30    0.41
   0  -6   2    0.27    0.27
   0  -6   2    0.88    0.48
   0  -6   2    0.22    0.27
   0  -6   2   -0.44    0.25
   0  -6   2   -0.21    0.26
   0  -6   2    0.82    0.40
   1  -6   2    3.65    0.57
   1  -6   2    3.44    0.50
   1  -6   2    2.44    0.61
   1  -6   2    2.59    0.63
   1  -6   2    3.53    0.41
   1  -6   2    3.28    0.41
   1  -6   2    3.06    0.39
   1  -6   2    3.26    0.39
  -2   6  -2   14.00    1.00
   2  -6   2   13.71    0.68
   2  -6   2   13.53    0.90
   2  -6   2   14.50    0.68
   2  -6   2   12.92    1.12
   2  -6   2   14.96    1.08
   2  -6   2   12.36    0.94
   2  -6   2   12.51    0.76
  -3   6  -2   27.53    1.43
   3  -6   2   33.00    1.46
   3  -6   2   31.08    1.45
   3  -6   2   32.38    1.62
   3  -6   2   32.24    1.33
   3  -6   2   32.34    1.60
   3  -6   2   29.16    1.00
  -4   6  -2    9.72    1.05
   4  -6   2    8.71    0.47
   4  -6   2   10.81    1.12
   4  -6   2    9.26    0.97
   4  -6   2   10.35    1.00
   4  -6   2    7.20    0.99
   4  -6   2    9.64    0.48
   4  -6   2   10.31    0.94
  -5   6  -2   39.07    1.94
   5  -6   2   39.80    1.90
   5  -6   2   38.03    1.94
   5  -6   2   40.25    1.99
   5  -6   2   40.32    1.94
   5  -6   2   39.16    1.81
   5  -6   2   42.69    1.80
  -6   6  -2    8.89    1.15
   6  -6   2    6.76    1.05
   6  -6   2    8.37    1.10
   6  -6   2    9.80    1.23
   6  -6   2    6.94    1.01
  -7   6  -2    0.62    0.74
   7  -6   2   -0.22    0.62
   7  -6   2   -0.59    0.57
   7  -6   2   -0.06    0.60
  -8   6  -2    1.82    0.89
  13   5  -2    1.58    1.02
  13   5  -2    2.12    0.75
  13   5  -2    2.21    1.00
 -13  -5   2    2.90    1.13
  12   5  -2   -0.51    0.73
  12   5  -2    0.36    0.74
  12   5  -2    1.32    0.67
 -12  -5   2    0.64    0.79
  11   5  -2   15.63    1.34
  11   5  -2   14.42    1.30
  11   5  -2   13.46    1.47
  11   5  -2   15.29    1.49
 -11  -5   2   16.31    1.56
 -11  -5   2   15.33    1.55
  10   5  -2    7.00    1.05
  10   5  -2    7.51    0.93
  10   5  -2    4.94    0.78
  10   5  -2    5.93    0.97
 -10  -5   2    6.17    1.01
 -10  -5   2    4.80    0.94
   9   5  -2   22.33    1.43
   9   5  -2   25.29    1.54
   9   5  -2   24.10    1.38
   9   5  -2   25.34    1.39
  -9  -5   2   25.41    1.53
  -9  -5   2   25.20    1.22
  -9  -5   2   27.42    1.58
   8   5  -2   94.27    3.01
   8   5  -2   94.79    3.00
   8   5  -2  100.33    3.11
   8   5  -2   96.15    3.17
   8   5  -2   96.25    2.78
  -8  -5   2   97.06    2.83
  -8  -5   2   98.91    3.14
  -8  -5   2   95.60    3.16
  -8  -5   2   98.49    2.88
   7   5  -2    4.62    0.62
   7   5  -2    5.66    0.79
   7   5  -2    5.17    0.68
   7   5  -2    5.78    0.59
  -7  -5   2    4.09    0.58
  -7  -5   2    5.42    0.79
  -7  -5   2    3.60    0.63
  -7  -5   2    5.11    0.63
   6   5  -2   53.07    1.88
   6   5  -2   54.54    1.88
   6   5  -2   53.65    1.98
   6   5  -2   54.74    1.75
  -6  -5   2   52.92    1.97
  -6  -5   2   51.59    1.82
  -6  -5   2   54.20    1.80
  -6  -5   2   53.94    1.84
  -6  -5   2   52.53    1.40
  -6  -5   2   59.59    2.00
  -6  -5   2   56.44    1.89
   5   5  -2   14.38    0.77
   5   5  -2   14.43    0.89
   5   5  -2   15.12    0.80
   5   5  -2   15.06    0.91
   5   5  -2   14.31    0.87
  -5  -5   2   13.10    0.85
  -5  -5   2   13.58    0.62
  -5  -5   2   15.46    0.97
  -5  -5   2   14.32    0.90
  -5  -5   2   14.92    0.86
  -5  -5   2   12.26    0.83
  -5  -5   2   14.35    0.83
   4   5  -2    1.34    0.40
   4   5  -2    1.50    0.41
   4   5  -2    1.91    0.41
   4   5  -2    2.28    0.34
   4   5  -2    2.96    0.53
  -4  -5   2    3.01    0.39
  -4  -5   2    2.49    0.51
  -4  -5   2    1.74    0.41
  -4  -5   2    1.96    0.41
  -4  -5   2    1.71    0.45
  -4  -5   2    2.09    0.45
   3   5  -2    4.23    0.49
   3   5  -2    4.68    0.50
   3   5  -2    5.47    0.64
   3   5  -2    4.47    0.52
   3   5  -2    5.02    0.34
  -3  -5   2    3.53    0.54
  -3  -5   2    4.87    0.61
  -3  -5   2    6.00    0.52
  -3  -5   2    3.61    0.49
  -3  -5   2    4.60    0.51
   2   5  -2   38.94    1.35
   2   5  -2   42.52    1.51
   2   5  -2   39.98    1.33
  -2  -5   2   39.77    1.36
  -2  -5   2   42.08    1.40
  -2  -5   2   39.95    1.50
  -2  -5   2   41.51    1.27
  -2  -5   2   39.68    1.45
   1   5  -2   54.40    1.84
   1   5  -2   54.43    1.56
  -1  -5   2   55.28    1.77
  -1  -5   2   53.26    1.55
  -1  -5   2   57.89    1.65
  -1  -5   2   53.82    1.84
  -1  -5   2   53.67    1.65
  -1  -5   2   53.77    1.63
   0   5  -2  136.88    3.21
   0  -5   2  134.59    3.39
   0  -5   2  132.11    3.37
   0  -5   2  134.81    3.71
   0  -5   2  136.56    3.60
   0  -5   2  134.94    3.20
   0  -5   2  136.15    3.41
   0  -5   2  135.64    3.39
  -1   5  -2   61.30    1.95
   1  -5   2   60.48    2.07
   1  -5   2   62.59    1.71
   1  -5   2   58.15    2.03
   1  -5   2   62.39    1.70
   1  -5   2   63.91    1.90
   1  -5   2   62.76    1.69
   1  -5   2   60.76    1.96
  -2   5  -2   18.98    1.00
   2  -5   2   18.68    0.99
   2  -5   2   18.03    0.67
   2  -5   2   18.55    0.94
   2  -5   2   17.24    1.07
   2  -5   2   19.26    1.12
   2  -5   2   17.94    0.69
   2  -5   2   17.89    0.69
  -3   5  -2   28.55    1.36
   3  -5   2   27.06    0.86
   3  -5   2   27.97    1.27
   3  -5   2   27.64    1.36
   3  -5   2   26.38    1.35
   3  -5   2   28.23    0.86
   3  -5   2   28.12    1.27
  -4   5  -2    4.40    0.73
   4  -5   2    4.76    0.72
   4  -5   2    4.06    0.64
   4  -5   2    4.00    0.67
   4  -5   2    3.17    0.67
   4  -5   2    2.74    0.66
  -5   5  -2   12.70    1.21
   5  -5   2   10.74    1.07
   5  -5   2   14.59    1.20
   5  -5   2   11.38    1.15
   5  -5   2   11.42    1.05
   5  -5   2   12.78    1.21
   5  -5   2   13.56    1.12
   5  -5   2   11.47    1.11
  -6   5  -2   15.31    1.40
   6  -5   2   15.99    1.22
   6  -5   2   14.40    1.25
   6  -5   2   15.98    1.23
   6  -5   2   16.07    1.39
   6  -5   2   17.87    1.33
   6  -5   2   17.38    1.26
   6  -5   2   15.53    1.22
  -7   5  -2    1.41    0.79
   7  -5   2    2.07    0.76
   7  -5   2    1.06    0.68
   7  -5   2    1.64    0.62
   7  -5   2    0.65    0.60
   7  -5   2    0.76    0.62
  -8   5  -2   23.95    1.98
   8  -5   2   17.42    1.66
   8  -5   2   20.01    1.73
  -9   5  -2    9.80    1.44
   9  -5   2    8.88    1.35
  13   4  -2   21.61    1.54
  13   4  -2   20.42    1.94
  13   4  -2   21.82    2.14
 -13  -4   2   20.13    1.99
  12   4  -2   -0.26    0.80
  12   4  -2    2.82    0.71
  12   4  -2    0.26    0.85
 -12  -4   2    2.18    0.95
  11   4  -2   23.37    1.69
  11   4  -2   25.88    1.86
  11   4  -2   25.62    1.50
 -11  -4   2   25.63    1.80
  10   4  -2   12.83    1.32
  10   4  -2   12.97    1.11
  10   4  -2   13.89    1.15
  10   4  -2   12.67    1.36
 -10  -4   2   14.26    1.46
 -10  -4   2   12.45    1.32
   9   4  -2    0.20    0.41
   9   4  -2    0.88    0.59
   9   4  -2    0.05    0.42
   9   4  -2    0.63    0.59
  -9  -4   2   -0.01    0.30
  -9  -4   2   -0.02    0.53
  -9  -4   2    0.25    0.56
   8   4  -2    0.28    0.35
   8   4  -2    0.81    0.44
   8   4  -2    0.36    0.48
   8   4  -2    0.55    0.43
  -8  -4   2    0.65    0.52
  -8  -4   2    0.37    0.34
  -8  -4   2    0.19    0.34
  -8  -4   2    0.24    0.51
   7   4  -2    1.58    0.45
   7   4  -2    1.79    0.45
   7   4  -2    0.23    0.32
   7   4  -2    1.50    0.56
  -7  -4   2    1.38    0.42
  -7  -4   2    1.26    0.53
  -7  -4   2    1.77    0.52
  -7  -4   2    0.76    0.36
   6   4  -2    8.85    0.74
   6   4  -2    9.26    0.75
   6   4  -2    8.96    0.62
   6   4  -2    9.58    0.86
  -6  -4   2    8.95    0.66
  -6  -4   2    9.22    0.82
  -6  -4   2    9.61    0.74
  -6  -4   2    8.33    0.83
  -6  -4   2    8.35    0.70
   5   4  -2  122.03    3.21
   5   4  -2  119.98    3.33
   5   4  -2  127.61    3.37
   5   4  -2  123.86    3.44
  -5  -4   2  124.61    3.42
  -5  -4   2  124.63    3.45
  -5  -4   2  123.67    3.29
  -5  -4   2  124.44    3.32
  -5  -4   2  125.89    2.93
  -5  -4   2  125.36    3.37
  -5  -4   2  126.99    3.34
   4   4  -2   35.66    1.31
   4   4  -2   38.92    1.35
   4   4  -2   37.10    1.40
   4   4  -2   37.55    1.25
  -4  -4   2   37.74    1.10
  -4  -4   2   35.89    1.30
  -4  -4   2   39.16    1.34
  -4  -4   2   38.65    1.36
  -4  -4   2   37.81    1.34
  -4  -4   2   38.70    1.30
  -4  -4   2   38.48    1.43
   3   4  -2   35.69    1.30
   3   4  -2   35.47    1.05
   3   4  -2   33.61    1.22
   3   4  -2   35.53    1.18
   3   4  -2   34.36    1.21
  -3  -4   2   36.54    1.28
  -3  -4   2   34.48    1.26
  -3  -4   2   33.89    1.24
  -3  -4   2   34.91    1.11
  -3  -4   2   34.59    1.18
  -3  -4   2   36.02    1.23
   2   4  -2  161.92    3.71
   2   4  -2  164.80    3.99
   2   4  -2  164.04    3.98
   2   4  -2  158.26    4.08
   2   4  -2  159.46    4.02
  -2  -4   2  160.18    4.01
  -2  -4   2  158.31    4.06
  -2  -4   2  160.80    3.90
  -2  -4   2  162.30    4.09
  -2  -4   2  160.66    3.98
   1   4  -2   24.49    0.86
   1   4  -2   26.18    1.07
  -1  -4   2   22.28    0.95
  -1  -4   2   23.76    0.89
  -1  -4   2   23.96    0.88
  -1  -4   2   24.25    1.04
  -1  -4   2   24.73    0.82
  -1  -4   2   24.12    0.90
   0   4  -2    7.04    0.37
   0  -4   2    6.53    0.46
   0  -4   2    6.57    0.64
   0  -4   2    6.31    0.46
   0  -4   2    6.68    0.47
   0  -4   2    7.78    0.62
   0  -4   2    7.69    0.49
  -1   4  -2   18.06    0.85
   1  -4   2   17.36    0.63
   1  -4   2   17.51    0.94
   1  -4   2   17.97    0.92
   1  -4   2   16.59    0.65
   1  -4   2   18.04    0.82
   1  -4   2   17.52    0.66
   1  -4   2   18.79    0.87
  -2   4  -2    1.86    0.40
   2  -4   2    2.37    0.41
   2  -4   2    2.71    0.43
   2  -4   2    2.41    0.48
   2  -4   2    2.54    0.25
   2  -4   2    2.25    0.25
   2  -4   2    1.42    0.41
   2  -4   2    1.99    0.22
  -3   4  -2   45.98    1.66
   3  -4   2   43.70    1.65
   3  -4   2   44.92    1.59
   3  -4   2   45.06    1.57
   3  -4   2   44.12    1.16
   3  -4   2   44.71    1.68
  -4   4  -2   42.81    1.70
   4  -4   2   41.92    1.60
   4  -4   2   42.58    1.72
   4  -4   2   39.37    1.64
   4  -4   2   45.60    1.70
   4  -4   2   41.47    1.62
  -5   4  -2   14.40    1.11
   5  -4   2   14.05    1.00
   5  -4   2   13.31    1.00
   5  -4   2   14.59    1.10
   5  -4   2   13.06    0.99
   5  -4   2   14.83    1.11
   5  -4   2   13.89    1.01
  -6   4  -2   35.40    1.78
   6  -4   2   35.72    1.74
   6  -4   2   36.16    1.66
   6  -4   2   35.74    1.64
   6  -4   2   36.00    1.72
   6  -4   2   37.04    1.78
   6  -4   2   35.39    1.62
  -7   4  -2    2.05    0.76
   7  -4   2    2.21    0.60
   7  -4   2    2.16    0.70
   7  -4   2    1.50    0.68
   7  -4   2    2.07    0.64
   7  -4   2    2.41    0.69
   7  -4   2    1.35    0.70
  -8   4  -2    0.56    0.72
   8  -4   2    0.23    0.61
   8  -4   2   -0.11    0.64
   8  -4   2    0.15    0.62
   8  -4   2    0.89    0.69
  -9   4  -2    2.52    0.94
   9  -4   2    1.05    0.84
   9  -4   2    0.35    0.72
   9  -4   2    0.50    0.79
 -10   4  -2   -0.21    0.84
  10  -4   2    1.23    0.95
  13   3  -2    1.76    0.95
  13   3  -2    4.15    1.23
  13   3  -2    2.34    0.74
 -13  -3   2    1.12    0.99
  12   3  -2    0.58    0.89
  12   3  -2   -0.52    0.74
  12   3  -2   -0.60    0.47
 -12  -3   2    0.05    0.88
  11   3  -2    3.99    0.94
  11   3  -2    3.55    1.04
  11   3  -2    3.13    0.71
 -11  -3   2    3.76    0.99
  10   3  -2   18.18    1.43
  10   3  -2   16.37    1.50
  10   3  -2   19.33    1.21
 -10  -3   2   20.16    1.53
   9   3  -2   11.38    1.20
   9   3  -2   10.87    0.94
   9   3  -2   10.82    1.13
   9   3  -2   10.72    0.94
  -9  -3   2   12.14    1.29
   8   3  -2   44.68    1.87
   8   3  -2   45.20    1.68
   8   3  -2   41.81    1.64
   8   3  -2   42.76    1.54
  -8  -3   2   43.36    1.41
  -8  -3   2   43.43    1.88
  -8  -3   2   47.89    1.97
  -8  -3   2   42.15    1.52
   7   3  -2   68.85    2.35
   7   3  -2   65.06    2.01
   7   3  -2   71.28    2.18
   7   3  -2   67.47    2.14
  -7  -3   2   68.07    2.37
  -7  -3   2   69.66    2.00
  -7  -3   2   68.22    2.35
  -7  -3   2   69.36    2.06
   6   3  -2    2.36    0.49
   6   3  -2    1.84    0.38
   6   3  -2    2.15    0.40
   6   3  -2    2.90    0.44
   6   3  -2    1.74    0.35
  -6  -3   2    3.10    0.54
  -6  -3   2    2.13    0.38
  -6  -3   2    2.31    0.41
  -6  -3   2    2.83    0.58
   5   3  -2   16.89    0.94
   5   3  -2   17.73    0.76
   5   3  -2   16.02    0.86
   5   3  -2   17.64    0.86
  -5  -3   2   16.78    0.92
  -5  -3   2   17.72    0.82
  -5  -3   2   17.39    0.96
  -5  -3   2   17.60    0.82
   4   3  -2    8.19    0.59
   4   3  -2    9.38    0.69
   4   3  -2    9.39    0.64
   4   3  -2    8.82    0.54
  -4  -3   2    8.50    0.62
  -4  -3   2    8.84    0.72
  -4  -3   2    8.40    0.70
  -4  -3   2    8.64    0.33
  -4  -3   2    9.35    0.61
  -4  -3   2    8.34    0.60
  -4  -3   2    8.84    0.62
   3   3  -2    7.30    0.61
   3   3  -2    7.74    0.56
   3   3  -2    7.20    0.48
   3   3  -2    7.04    0.53
  -3  -3   2    7.63    0.57
  -3  -3   2    7.03    0.57
  -3  -3   2    7.48    0.39
  -3  -3   2    6.90    0.53
  -3  -3   2    7.43    0.51
  -3  -3   2    7.93    0.56
  -3  -3   2    8.59    0.57
   2   3  -2   76.83    2.02
   2   3  -2   78.87    2.04
   2   3  -2   76.77    1.88
   2   3  -2   75.71    2.01
   2   3  -2   74.31    2.07
  -2  -3   2   77.07    2.07
  -2  -3   2   75.07    1.97
  -2  -3   2   74.98    2.04
  -2  -3   2   75.10    2.02
  -2  -3   2   77.98    2.08
  -2  -3   2   74.12    1.95
   1   3  -2   97.21    2.47
   1   3  -2  100.39    2.61
  -1  -3   2  101.07    2.41
  -1  -3   2  100.96    2.56
  -1  -3   2   96.54    2.49
  -1  -3   2  100.03    2.60
  -1  -3   2  100.78    2.50
  -1  -3   2   96.84    2.48
   0   3  -2   13.33    0.50
   0   3  -2   14.53    0.79
   0  -3   2   13.69    0.55
   0  -3   2   13.77    0.56
   0  -3   2   13.87    0.56
   0  -3   2   14.03    0.73
   0  -3   2   14.23    0.65
   0  -3   2   13.66    0.56
  -1   3  -2  114.64    2.88
   1  -3   2  108.90    2.67
   1  -3   2  109.98    2.95
   1  -3   2  112.08    2.68
   1  -3   2  112.85    2.82
   1  -3   2  111.74    2.87
   1  -3   2  112.92    2.66
  -2   3  -2   50.76    1.60
   2  -3   2   51.93    1.28
   2  -3   2   50.69    1.27
   2  -3   2   52.53    1.56
   2  -3   2   50.16    1.63
   2  -3   2   52.38    1.66
   2  -3   2   48.75    1.56
  -3   3  -2    3.40    0.52
   3  -3   2    2.66    0.45
   3  -3   2    3.49    0.50
   3  -3   2    3.02    0.43
  -4   3  -2    2.60    0.53
   4  -3   2    2.80    0.48
   4  -3   2    2.60    0.45
   4  -3   2    3.42    0.50
   4  -3   2    3.22    0.53
  -5   3  -2    5.89    0.76
   5  -3   2    4.56    0.65
   5  -3   2    5.47    0.75
   5  -3   2    4.82    0.64
   5  -3   2    5.29    0.66
  -6   3  -2   27.79    1.54
   6  -3   2   28.01    1.42
   6  -3   2   27.68    1.35
   6  -3   2   26.36    1.45
   6  -3   2   27.40    1.33
  -7   3  -2   24.09    1.56
   7  -3   2   24.63    1.42
   7  -3   2   23.18    1.49
   7  -3   2   24.56    1.27
   7  -3   2   23.67    0.76
  -8   3  -2    0.84    0.67
   8  -3   2    1.33    0.72
   8  -3   2    1.02    0.70
   8  -3   2    2.18    0.65
  -9   3  -2   22.03    1.73
   9  -3   2   22.77    1.72
   9  -3   2   23.63    1.69
 -10   3  -2    6.11    1.25
  10  -3   2    7.17    1.24
  10  -3   2    6.41    1.24
  12   2  -2   16.20    1.82
  12   2  -2   23.30    1.38
  12   2  -2   21.49    1.89
 -12  -2   2   21.22    2.00
  11   2  -2    5.83    1.13
  11   2  -2    5.21    0.76
  11   2  -2    3.85    0.98
 -11  -2   2    5.10    1.09
  10   2  -2    9.14    0.88
  10   2  -2    8.36    1.11
  10   2  -2    8.09    1.23
 -10  -2   2    9.50    1.24
   9   2  -2    0.16    0.55
   9   2  -2   -0.03    0.38
   9   2  -2    0.64    0.62
  -9  -2   2   -0.55    0.55
   8   2  -2    4.10    0.56
   8   2  -2    4.76    0.79
   8   2  -2    4.15    0.55
   8   2  -2    4.71    0.58
  -8  -2   2    4.75    0.76
   7   2  -2   21.58    0.97
   7   2  -2   20.66    1.00
   7   2  -2   24.59    1.06
   7   2  -2   24.82    1.25
  -7  -2   2   20.32    1.20
  -7  -2   2   20.47    1.21
   6   2  -2   28.95    1.12
   6   2  -2   28.99    1.12
   6   2  -2   30.66    1.16
   6   2  -2   30.34    1.09
   6   2  -2   32.38    1.33
  -6  -2   2   28.44    1.29
  -6  -2   2   27.86    1.09
  -6  -2   2   28.54    0.99
  -6  -2   2   29.58    1.31
   5   2  -2    0.56    0.34
   5   2  -2    0.34    0.29
   5   2  -2    0.55    0.28
   5   2  -2    0.26    0.27
   5   2  -2    0.62    0.26
  -5  -2   2    0.83    0.27
  -5  -2   2    0.13    0.36
  -5  -2   2    0.29    0.28
  -5  -2   2    0.32    0.38
   4   2  -2  171.69    4.09
   4   2  -2  168.24    4.18
   4   2  -2  170.98    4.20
   4   2  -2  170.49    4.29
   4   2  -2  173.46    4.19
  -4  -2   2  169.06    4.13
  -4  -2   2  173.77    4.33
  -4  -2   2  165.82    4.29
  -4  -2   2  172.39    4.17
   3   2  -2    6.66    0.53
   3   2  -2    5.36    0.39
   3   2  -2    5.70    0.46
   3   2  -2    5.86    0.45
  -3  -2   2    5.11    0.45
  -3  -2   2    5.68    0.44
  -3  -2   2    5.14    0.52
  -3  -2   2    5.13    0.42
  -3  -2   2    5.20    0.42
   2   2  -2   94.22    2.44
   2   2  -2   94.97    2.38
   2   2  -2   96.27    2.39
   2   2  -2  101.42    2.45
   2   2  -2  100.16    2.49
  -2  -2   2   96.60    2.48
  -2  -2   2   97.42    2.45
  -2  -2   2   96.84    2.44
  -2  -2   2   99.41    2.41
  -2  -2   2   96.74    2.45
  -2  -2   2   99.68    2.32
   1   2  -2   65.43    1.64
   1   2  -2   62.15    1.63
   1   2  -2   63.63    1.52
   1   2  -2   64.50    1.70
  -1  -2   2   63.61    1.67
  -1  -2   2   63.86    1.65
  -1  -2   2   64.63    1.64
  -1  -2   2   63.66    1.57
  -1  -2   2   64.98    1.70
  -1  -2   2   63.85    1.63
   0   2  -2   12.52    0.64
   0   2  -2   12.11    0.42
   0  -2   2   12.20    0.44
   0  -2   2   12.40    0.46
   0  -2   2   11.61    0.46
   0  -2   2   11.97    0.58
   0  -2   2   11.80    0.46
   0  -2   2   10.75    0.50
   0  -2   2   11.75    0.55
  -1   2  -2    9.57    0.50
   1  -2   2    8.92    0.47
   1  -2   2    8.32    0.53
   1  -2   2    8.86    0.31
   1  -2   2    8.29    0.51
   1  -2   2    8.91    0.35
   1  -2   2    8.95    0.34
  -2   2  -2  122.86    3.18
   2  -2   2  124.81    3.16
   2  -2   2  123.89    2.85
   2  -2   2  122.80    3.11
   2  -2   2  129.32    3.19
  -3   2  -2   16.54    0.85
   3  -2   2   16.30    0.79
   3  -2   2   18.13    0.81
   3  -2   2   17.30    0.84
  -4   2  -2   68.45    2.17
   4  -2   2   70.58    2.08
   4  -2   2   70.22    2.15
   4  -2   2   68.84    1.69
   4  -2   2   68.79    1.69
   4  -2   2   68.95    2.20
   4  -2   2   71.31    2.07
  -5   2  -2   47.14    1.81
   5  -2   2   46.72    1.26
   5  -2   2   50.17    1.66
   5  -2   2   45.78    1.71
   5  -2   2   48.45    1.80
   5  -2   2   47.47    1.26
   5  -2   2   47.70    1.62
  -6   2  -2    0.71    0.52
   6  -2   2    0.17    0.39
   6  -2   2    0.23    0.19
   6  -2   2   -0.09    0.19
   6  -2   2    0.94    0.42
   6  -2   2    0.02    0.41
   6  -2   2    0.61    0.36
  -7   2  -2    1.07    0.59
   7  -2   2    1.70    0.30
   7  -2   2    1.30    0.29
   7  -2   2    1.40    0.61
   7  -2   2    1.08    0.53
   7  -2   2    2.22    0.57
   7  -2   2    1.71    0.49
  -8   2  -2    0.09    0.61
   8  -2   2    0.52    0.50
   8  -2   2    0.78    0.30
   8  -2   2    0.59    0.60
  -9   2  -2    0.42    0.77
   9  -2   2    1.36    0.35
   9  -2   2    0.71    0.73
   9  -2   2    0.73    0.69
 -10   2  -2   10.55    1.48
  10  -2   2   12.47    1.50
  10  -2   2   10.64    0.71
  10  -2   2   10.56    1.48
 -11   2  -2    2.31    1.03
  11  -2   2    2.47    1.01
  11  -2   2    2.30    0.40
  11  -2   2    2.63    1.08
  12   1  -2    3.69    1.20
  12   1  -2    3.61    1.04
  12   1  -2    1.70    0.56
 -12  -1   2    2.23    1.02
  11   1  -2    9.37    1.26
  11   1  -2   10.79    1.46
  11   1  -2    8.91    0.91
 -11  -1   2    9.68    1.40
  10   1  -2    1.70    0.83
  10   1  -2    0.48    0.44
  10   1  -2    1.26    0.72
 -10  -1   2    0.76    0.78
   9   1  -2   35.54    1.80
   9   1  -2   37.82    1.96
   9   1  -2   36.10    1.45
  -9  -1   2   34.53    1.91
   8   1  -2   13.75    0.88
   8   1  -2   11.10    0.80
   8   1  -2   12.03    1.11
  -8  -1   2   12.72    1.20
   7   1  -2   14.11    0.79
   7   1  -2   13.43    1.08
   7   1  -2   14.77    0.79
   7   1  -2   14.23    1.01
   7   1  -2   14.68    0.81
  -7  -1   2   12.70    1.11
   6   1  -2   62.88    1.81
   6   1  -2   60.42    1.80
   6   1  -2   61.83    1.83
   6   1  -2   61.98    2.05
   6   1  -2   60.34    1.57
   6   1  -2   61.84    1.83
  -6  -1   2   61.55    2.12
   5   1  -2    2.89    0.36
   5   1  -2    3.19    0.38
   5   1  -2    2.95    0.37
   5   1  -2    3.38    0.25
   5   1  -2    2.52    0.35
   5   1  -2    2.39    0.46
  -5  -1   2    3.56    0.57
   4   1  -2   16.61    0.67
   4   1  -2   18.56    0.83
   4   1  -2   15.92    0.67
   4   1  -2   15.49    0.67
   4   1  -2   15.76    0.65
   4   1  -2   16.19    0.49
  -4  -1   2   17.04    0.72
  -4  -1   2   16.34    0.85
  -4  -1   2   16.89    0.60
  -4  -1   2   14.27    0.82
   3   1  -2   20.23    0.73
   3   1  -2   22.00    0.70
   3   1  -2   21.64    0.76
   3   1  -2   22.77    0.86
   3   1  -2   22.41    0.76
  -3  -1   2   22.86    0.72
  -3  -1   2   22.34    0.88
  -3  -1   2   21.99    0.79
  -3  -1   2   21.25    0.87
   2   1  -2    2.16    0.21
   2   1  -2    2.13    0.25
   2   1  -2    2.64    0.26
   2   1  -2    2.71    0.27
   2   1  -2    2.17    0.28
  -2  -1   2    2.35    0.28
  -2  -1   2    2.15    0.24
  -2  -1   2    3.15    0.35
  -2  -1   2    2.39    0.30
   1   1  -2  210.85    4.76
   1   1  -2  210.65    4.77
   1   1  -2  212.54    4.74
   1   1  -2  205.19    4.70
   1   1  -2  199.09    4.75
  -1  -1   2  210.64    4.77
  -1  -1   2  209.25    4.72
  -1  -1   2  199.76    4.75
  -1  -1   2  203.99    4.77
  -1  -1   2  202.82    4.75
  -1  -1   2  210.59    4.70
   0   1  -2  297.98    6.89
   0   1  -2  297.87    6.78
   0   1  -2  303.60    6.80
   0   1  -2  296.80    6.79
   0  -1   2  296.55    6.80
   0  -1   2  301.67    6.80
   0  -1   2  300.19    6.85
   0  -1   2  303.75    6.85
   0  -1   2  316.08    6.78
   0  -1   2  302.33    6.81
   0  -1   2  290.03    6.80
  -1   1  -2   40.00    1.06
   1  -1   2   37.72    0.92
   1  -1   2   38.00    0.93
   1  -1   2   38.69    1.07
   1  -1   2   38.38    1.06
  -2   1  -2   21.55    0.80
   2  -1   2   20.31    0.55
   2  -1   2   21.00    0.78
   2  -1   2   20.07    0.54
   2  -1   2   21.03    0.74
  -3   1  -2    1.08    0.35
   3  -1   2    0.75    0.24
   3  -1   2    0.83    0.15
   3  -1   2    0.68    0.15
   3  -1   2    0.74    0.31
   3  -1   2    1.27    0.30
  -4   1  -2   11.66    0.75
   4  -1   2   12.04    0.47
   4  -1   2   10.74    0.41
   4  -1   2   11.08    0.62
   4  -1   2   11.82    0.47
   4  -1   2   12.56    0.70
   4  -1   2   11.49    0.77
  -5   1  -2   19.89    1.08
   5  -1   2   20.33    1.05
   5  -1   2   20.13    0.86
   5  -1   2   19.52    0.96
   5  -1   2   18.89    0.69
   5  -1   2   18.37    0.65
   5  -1   2   19.25    0.70
  -6   1  -2    6.13    0.79
   6  -1   2    4.88    0.40
   6  -1   2    4.18    0.66
   6  -1   2    5.03    0.42
   6  -1   2    6.21    0.57
   6  -1   2    4.11    0.58
  -7   1  -2   15.59    1.21
   7  -1   2   15.19    0.90
   7  -1   2   16.34    0.74
   7  -1   2   14.53    1.13
   7  -1   2   15.56    0.74
   7  -1   2   15.92    1.04
  -8   1  -2   52.45    2.30
   8  -1   2   53.77    2.25
   8  -1   2   54.88    1.66
   8  -1   2   51.21    2.05
  -9   1  -2    3.33    0.87
   9  -1   2    1.76    0.76
   9  -1   2    1.14    0.38
 -10   1  -2    6.92    1.18
  10  -1   2    6.37    0.65
  10  -1   2    7.51    1.18
  10  -1   2    5.01    1.13
 -11   1  -2    1.29    0.90
  11  -1   2    3.59    0.56
  11  -1   2    2.21    0.98
  11  -1   2    3.15    1.05
  12   0  -2    1.64    0.55
  12   0  -2    3.72    1.19
 -12   0   2    5.55    1.32
  11   0  -2   17.47    1.85
  11   0  -2   15.59    1.04
  11   0  -2   13.59    1.49
 -11   0   2   14.81    1.63
  10   0  -2    3.03    0.54
  10   0  -2    3.36    0.89
  10   0  -2    2.95    0.95
 -10   0   2    2.84    0.94
   9   0  -2    0.18    0.64
   9   0  -2    0.26    0.35
   9   0  -2   -0.01    0.59
  -9   0   2    1.04    0.67
   8   0  -2    0.90    0.37
   8   0  -2    1.60    0.67
   8   0  -2    0.12    0.51
  -8   0   2    1.25    0.65
   7   0  -2    5.25    0.50
   7   0  -2    7.07    0.68
   7   0  -2    6.10    0.53
   7   0  -2    6.65    0.78
  -7   0   2    6.39    0.82
   6   0  -2   64.09    2.14
   6   0  -2   64.14    1.79
   6   0  -2   65.48    1.83
   6   0  -2   64.75    1.97
   6   0  -2   63.42    1.79
   6   0  -2   64.93    1.82
  -6   0   2   62.14    2.22
   5   0  -2   96.99    2.76
   5   0  -2   97.09    2.60
   5   0  -2   95.16    2.47
   5   0  -2   94.71    2.44
   5   0  -2   97.98    2.47
   5   0  -2   98.84    2.47
  -5   0   2   93.80    2.83
   4   0  -2    5.39    0.39
   4   0  -2    4.73    0.38
   4   0  -2    6.26    0.49
   4   0  -2    5.76    0.55
   4   0  -2    4.90    0.35
  -4   0   2    4.82    0.58
   3   0  -2  143.64    3.47
   3   0  -2  150.91    3.50
   3   0  -2  149.49    3.67
   3   0  -2  150.26    3.49
   3   0  -2  149.16    3.57
  -3   0   2  146.10    3.74
   2   0  -2  108.80    2.61
   2   0  -2  105.75    2.58
   2   0  -2  109.75    2.57
   2   0  -2  110.89    2.69
   2   0  -2  109.77    2.58
  -2   0   2  112.78    2.76
  -2   0   2  112.03    2.50
   1   0  -2   19.66    0.51
   1   0  -2   19.08    0.53
   1   0  -2   19.20    0.52
   1   0  -2   20.43    0.54
   1   0  -2   19.83    0.56
  -1   0   2   19.34    0.60
  -1   0   2   20.82    0.61
  -1   0   2   20.37    0.51
  -1   0   2   20.17    0.54
   0   0  -2   -0.69    0.04
   0   0  -2   -0.65    0.03
   0   0  -2   -0.72    0.03
   0   0   2   -0.62    0.05
   0   0   2   -0.67    0.05
  -1   0  -2    5.87    0.29
  -1   0  -2    6.19    0.24
  -1   0  -2    6.40    0.22
  -1   0  -2    6.69    0.30
   1   0   2    6.25    0.31
   1   0   2    5.72    0.23
   1   0   2    5.95    0.20
   1   0   2    6.26    0.24
   1   0   2    6.32    0.29
   1   0   2    5.83    0.23
   1   0   2    5.63    0.25
  -2   0  -2    6.51    0.24
  -2   0  -2    6.36    0.45
   2   0   2    7.20    0.32
   2   0   2    6.74    0.46
   2   0   2    6.48    0.29
   2   0   2    6.03    0.39
   2   0   2    6.45    0.34
   2   0   2    6.26    0.32
  -3   0  -2  205.68    5.01
   3   0   2  206.92    4.76
   3   0   2  205.40    4.79
   3   0   2  205.12    4.94
   3   0   2  208.80    5.02
   3   0   2  209.74    4.80
   3   0   2  202.92    4.81
  -4   0  -2    4.52    0.56
   4   0   2    4.59    0.33
   4   0   2    5.00    0.39
   4   0   2    3.58    0.43
   4   0   2    4.10    0.52
   4   0   2    4.37    0.35
   4   0   2    4.18    0.34
  -5   0  -2  123.85    3.45
   5   0   2  122.74    3.42
   5   0   2  124.05    3.08
   5   0   2  124.88    3.30
   5   0   2  123.92    3.05
   5   0   2  122.62    3.10
   5   0   2  124.72    3.07
  -6   0  -2   49.47    1.90
   6   0   2   50.01    1.51
   6   0   2   52.74    1.50
   6   0   2   50.92    1.73
   6   0   2   49.37    1.51
   6   0   2   52.21    1.88
   6   0   2   49.91    1.50
  -7   0  -2    2.35    0.62
   7   0   2    1.32    0.53
   7   0   2    1.32    0.34
   7   0   2    2.33    0.50
   7   0   2    1.63    0.37
  -8   0  -2    3.59    0.81
   8   0   2    2.33    0.45
   8   0   2    2.64    0.70
   8   0   2    2.35    0.56
  -9   0  -2    1.89    0.72
   9   0   2    1.10    0.40
   9   0   2    1.47    0.71
 -10   0  -2    6.39    1.10
  10   0   2    5.39    1.10
  10   0   2    5.55    1.01
  10   0   2    3.80    0.59
 -11   0  -2   28.74    2.05
  11   0   2   24.55    1.92
  11   0   2   25.26    1.28
  11   0   2   26.42    1.88
 -12   0  -2    6.28    1.29
  12   0   2    4.73    1.28
  12   0   2    8.07    1.34
  12   0   2    3.38    0.66
  11  -1  -2    6.89    1.19
  11  -1  -2    6.77    0.69
  11  -1  -2    7.13    1.32
 -11   1   2    3.62    1.10
  10  -1  -2    9.85    1.40
  10  -1  -2    9.02    0.73
  10  -1  -2   10.18    1.27
 -10   1   2    7.84    1.32
   9  -1  -2    4.32    0.97
   9  -1  -2    3.91    0.49
   9  -1  -2    5.76    0.94
  -9   1   2    3.85    0.97
   8  -1  -2   60.15    1.80
   8  -1  -2   62.01    2.40
   8  -1  -2   59.82    2.48
  -8   1   2   57.85    2.46
   7  -1  -2   28.62    1.04
   7  -1  -2   31.31    1.35
   7  -1  -2   27.51    1.01
   7  -1  -2   28.43    1.44
   7  -1  -2   28.87    1.58
  -7   1   2   32.23    1.67
   6  -1  -2    2.95    0.33
   6  -1  -2    2.82    0.33
   6  -1  -2    3.29    0.58
   6  -1  -2    2.42    0.48
   6  -1  -2    2.74    0.43
  -6   1   2    3.45    0.68
   5  -1  -2    0.35    0.28
   5  -1  -2    0.68    0.22
   5  -1  -2    0.55    0.31
   5  -1  -2    0.51    0.19
   5  -1  -2    0.69    0.20
   5  -1  -2    0.81    0.37
  -5   1   2    0.37    0.38
   4  -1  -2    3.27    0.45
   4  -1  -2    4.37    0.30
   4  -1  -2    3.87    0.26
   4  -1  -2    3.95    0.30
   4  -1  -2    3.36    0.43
  -4   1   2    4.35    0.57
   3  -1  -2   12.89    0.65
   3  -1  -2   12.09    0.61
   3  -1  -2   12.26    0.41
  -3   1   2   11.60    0.73
   2  -1  -2   93.44    2.40
  -2   1   2   95.25    2.48
   1  -1  -2    9.74    0.45
  -1   1   2   10.32    0.50
   0  -1  -2  307.74    6.90
   0  -1  -2  297.71    6.90
   0  -1  -2  303.61    6.89
   0  -1  -2  303.54    7.00
   0  -1  -2  310.67    6.91
   0  -1  -2  312.34    6.98
   0   1   2  307.30    6.95
   0   1   2  305.06    6.89
   0   1   2  304.57    6.92
  -1  -1  -2  244.89    5.57
  -1  -1  -2  247.60    5.61
  -1  -1  -2  248.41    5.55
  -1  -1  -2  239.32    5.59
  -1  -1  -2  241.69    5.59
   1   1   2  242.42    5.59
   1   1   2  245.37    5.60
   1   1   2  246.81    5.59
   1   1   2  243.94    5.60
   1   1   2  246.05    5.55
  -2  -1  -2    1.63    0.16
  -2  -1  -2    1.89    0.28
  -2  -1  -2    1.27    0.25
  -2  -1  -2    1.52    0.22
  -2  -1  -2    1.69    0.30
   2   1   2    1.76    0.23
   2   1   2    1.66    0.25
   2   1   2    1.62    0.16
   2   1   2    1.22    0.21
   2   1   2    1.35    0.22
   2   1   2    1.42    0.26
  -3  -1  -2   90.77    2.46
  -3  -1  -2   94.85    2.48
  -3  -1  -2   94.94    2.24
  -3  -1  -2   91.24    2.40
  -3  -1  -2   92.83    2.29
   3   1   2   93.02    2.33
   3   1   2   92.74    2.38
   3   1   2   92.37    2.32
   3   1   2   93.95    2.19
   3   1   2   93.93    2.33
   3   1   2   93.63    2.47
  -4  -1  -2   13.79    0.72
  -4  -1  -2   14.21    0.55
   4   1   2   13.45    0.63
   4   1   2   13.54    0.61
   4   1   2   15.06    0.63
   4   1   2   13.65    0.67
   4   1   2   12.91    0.77
   4   1   2   14.72    0.49
  -5  -1  -2   26.14    1.09
  -5  -1  -2   25.81    1.16
  -5  -1  -2   25.22    0.77
   5   1   2   25.75    0.93
   5   1   2   23.94    0.93
   5   1   2   26.22    1.02
   5   1   2   25.43    0.92
   5   1   2   25.36    0.78
   5   1   2   25.15    1.15
  -6  -1  -2   61.23    2.15
   6   1   2   64.39    1.86
   6   1   2   61.38    1.95
   6   1   2   63.17    1.84
   6   1   2   68.11    2.18
   6   1   2   63.17    1.67
   6   1   2   62.78    1.84
  -7  -1  -2   21.45    1.23
   7   1   2   21.70    0.97
   7   1   2   23.14    0.98
   7   1   2   23.37    1.00
   7   1   2   21.31    1.25
   7   1   2   22.14    1.08
  -8  -1  -2   16.37    1.25
   8   1   2   15.59    1.00
   8   1   2   16.28    1.31
   8   1   2   14.32    0.88
  -9  -1  -2   31.71    1.80
   9   1   2   34.13    1.37
   9   1   2   32.49    1.70
   9   1   2   30.15    1.69
 -10  -1  -2    0.65    0.77
  10   1   2   -0.17    0.64
  10   1   2    0.47    0.43
 -11  -1  -2    0.48    0.73
  11   1   2    5.16    1.07
  11   1   2    3.93    0.67
  11   1   2    3.45    1.06
 -12  -1  -2    1.32    0.99
  12   1   2    1.65    0.56
  12   1   2    0.91    0.85
  12   1   2    2.35    1.02
  11  -2  -2    1.83    1.00
  11  -2  -2    1.00    0.35
 -11   2   2    1.38    0.96
  10  -2  -2    8.89    1.28
  10  -2  -2    7.87    1.33
  10  -2  -2   10.40    0.67
 -10   2   2    7.24    1.26
   9  -2  -2    0.26    0.68
   9  -2  -2    0.92    0.33
   9  -2  -2    2.02    0.86
  -9   2   2    1.18    0.75
   8  -2  -2    3.81    0.91
   8  -2  -2    2.51    0.68
   8  -2  -2    2.02    0.35
  -8   2   2    2.10    0.79
   7  -2  -2   10.43    0.57
   7  -2  -2    9.82    0.54
   7  -2  -2   12.47    1.13
   7  -2  -2    9.41    0.92
   7  -2  -2   12.32    1.18
  -7   2   2   11.18    1.17
   6  -2  -2    7.51    0.72
   6  -2  -2    7.46    0.44
   6  -2  -2    7.96    0.92
   6  -2  -2   10.66    0.96
   6  -2  -2    7.54    0.44
   6  -2  -2    8.37    0.81
  -6   2   2    9.31    0.99
   5  -2  -2   52.87    1.81
   5  -2  -2   48.35    1.71
   5  -2  -2   48.51    1.28
   5  -2  -2   49.51    1.29
   5  -2  -2   50.37    1.66
  -5   2   2   47.60    1.85
   4  -2  -2   86.53    2.48
   4  -2  -2   83.67    2.50
  -4   2   2   89.00    2.64
   3  -2  -2   16.56    0.81
  -3   2   2   15.87    0.90
  -2   2   2  129.20    3.34
   1  -2  -2   40.54    1.24
   1  -2  -2   40.19    0.98
   1  -2  -2   41.07    0.99
   1  -2  -2   39.37    1.14
   1  -2  -2   39.88    1.23
  -1   2   2   39.44    1.23
   0  -2  -2    2.55    0.31
   0  -2  -2    3.10    0.24
   0  -2  -2    3.24    0.23
   0  -2  -2    2.94    0.24
   0  -2  -2    3.61    0.38
   0  -2  -2    3.67    0.38
   0  -2  -2    3.20    0.24
   0   2   2    3.42    0.23
   0   2   2    3.77    0.35
  -1  -2  -2  235.50    5.46
  -1  -2  -2  240.41    5.34
  -1  -2  -2  230.59    5.44
  -1  -2  -2  233.18    5.44
  -1  -2  -2  233.34    5.48
  -1  -2  -2  230.67    5.49
   1   2   2  240.82    5.47
   1   2   2  238.00    5.44
   1   2   2  236.04    5.48
   1   2   2  234.32    5.44
  -2  -2  -2    1.50    0.27
  -2  -2  -2    2.86    0.34
  -2  -2  -2    2.16    0.31
  -2  -2  -2    1.28    0.26
  -2  -2  -2    2.54    0.26
   2   2   2    1.67    0.29
   2   2   2    1.81    0.27
   2   2   2    1.73    0.26
   2   2   2    1.71    0.28
  -3  -2  -2   54.46    1.63
  -3  -2  -2   54.59    1.53
  -3  -2  -2   56.01    1.62
  -3  -2  -2   56.76    1.60
  -3  -2  -2   54.85    1.44
  -3  -2  -2   55.76    1.55
   3   2   2   55.57    1.57
   3   2   2   57.03    1.56
   3   2   2   57.22    1.56
   3   2   2   54.52    1.62
   3   2   2   55.77    1.35
  -4  -2  -2  155.62    3.80
  -4  -2  -2  157.02    3.70
  -4  -2  -2  153.31    3.98
  -4  -2  -2  152.53    3.91
  -4  -2  -2  156.38    3.97
   4   2   2  159.49    3.85
   4   2   2  156.68    3.85
   4   2   2  159.02    3.98
   4   2   2  156.26    3.83
   4   2   2  147.84    3.82
  -5  -2  -2    5.85    0.61
  -5  -2  -2    6.37    0.42
  -5  -2  -2    5.85    0.61
  -5  -2  -2    6.35    0.48
   5   2   2    6.79    0.53
   5   2   2    6.08    0.53
   5   2   2    6.28    0.64
   5   2   2    6.70    0.55
   5   2   2    6.91    0.56
  -6  -2  -2   23.80    1.19
  -6  -2  -2   24.29    1.13
   6   2   2   24.22    1.19
   6   2   2   25.53    1.01
   6   2   2   23.04    1.01
   6   2   2   24.54    1.00
   6   2   2   23.40    1.02
  -7  -2  -2    5.24    0.41
  -7  -2  -2    5.41    0.70
  -7  -2  -2    5.50    0.73
   7   2   2    4.29    0.55
   7   2   2    5.21    0.56
   7   2   2    5.47    0.74
   7   2   2    5.55    0.58
  -8  -2  -2    2.29    0.71
   8   2   2    1.82    0.45
   8   2   2    1.41    0.46
   8   2   2    2.90    0.49
   8   2   2    1.74    0.62
  -9  -2  -2    3.70    0.78
   9   2   2    5.57    0.92
   9   2   2    4.64    0.65
   9   2   2    4.61    0.69
 -10  -2  -2    8.09    1.11
  10   2   2    8.37    1.16
  10   2   2    7.46    0.82
 -11  -2  -2    5.13    1.01
  11   2   2    4.23    0.69
  11   2   2    1.73    0.85
  11   2   2    5.30    1.16
 -12  -2  -2   18.89    1.86
  12   2   2   19.73    1.31
  12   2   2   21.79    2.04
  12   2   2   23.92    1.84
  10  -3  -2    7.95    1.31
  10  -3  -2    9.59    1.43
 -10   3   2    6.23    1.26
   9  -3  -2   18.21    1.74
   9  -3  -2   17.65    1.73
   9  -3  -2   18.99    1.62
  -9   3   2   16.68    1.66
   8  -3  -2    1.00    0.72
   8  -3  -2    0.45    0.57
  -8   3   2    0.35    0.71
   7  -3  -2   19.27    1.27
   7  -3  -2   19.23    1.40
   7  -3  -2   23.71    1.33
   7  -3  -2   18.79    1.27
  -7   3   2   21.02    1.49
   6  -3  -2   11.20    1.09
   6  -3  -2    9.86    0.95
   6  -3  -2   10.83    1.02
   6  -3  -2   11.69    0.91
  -6   3   2   10.38    1.09
   5  -3  -2    2.07    0.52
   5  -3  -2    2.43    0.52
   5  -3  -2    2.31    0.48
   5  -3  -2    2.13    0.57
  -5   3   2    2.40    0.61
   4  -3  -2    1.26    0.42
   4  -3  -2    0.83    0.38
   4  -3  -2    1.58    0.43
  -4   3   2    1.21    0.46
   3  -3  -2    8.37    0.68
   3  -3  -2    8.61    0.75
  -3   3   2   10.08    0.77
   2  -3  -2   28.61    1.03
   2  -3  -2   27.42    1.11
   2  -3  -2   27.75    0.72
   2  -3  -2   27.45    1.08
   2  -3  -2   28.18    0.73
  -2   3   2   29.24    1.17
   1  -3  -2   78.03    1.91
   1  -3  -2   79.02    1.92
   1  -3  -2   79.46    2.20
   1  -3  -2   81.44    2.26
   1  -3  -2   80.01    2.05
   1  -3  -2   78.80    1.88
   1  -3  -2   77.16    2.20
  -1   3   2   77.52    2.22
   0  -3  -2   18.10    0.81
   0  -3  -2   17.10    0.63
   0  -3  -2   17.46    0.78
   0  -3  -2   18.14    0.79
   0  -3  -2   18.60    0.62
   0  -3  -2   18.00    0.57
   0  -3  -2   17.36    0.63
   0   3   2   18.28    0.81
   0   3   2   18.18    0.56
  -1  -3  -2   43.10    1.24
  -1  -3  -2   42.38    1.01
  -1  -3  -2   42.31    1.22
  -1  -3  -2   41.37    1.29
  -1  -3  -2   40.51    1.20
  -1  -3  -2   42.93    1.22
  -1  -3  -2   41.33    1.31
   1   3   2   42.07    1.28
   1   3   2   43.13    1.20
  -2  -3  -2    2.72    0.37
  -2  -3  -2    3.78    0.43
  -2  -3  -2    2.49    0.34
  -2  -3  -2    3.67    0.39
  -2  -3  -2    3.54    0.37
   2   3   2    2.39    0.33
   2   3   2    2.70    0.36
   2   3   2    2.79    0.35
   2   3   2    3.11    0.35
  -3  -3  -2   10.40    0.64
  -3  -3  -2   10.86    0.61
  -3  -3  -2   10.99    0.67
  -3  -3  -2   11.31    0.57
  -3  -3  -2   11.71    0.68
   3   3   2   11.88    0.65
   3   3   2   10.35    0.63
   3   3   2   11.26    0.63
   3   3   2   10.37    0.61
  -4  -3  -2    9.64    0.63
  -4  -3  -2   11.61    0.72
  -4  -3  -2   10.33    0.55
  -4  -3  -2   11.40    0.72
  -4  -3  -2   10.68    0.66
  -4  -3  -2   11.30    0.72
   4   3   2    9.85    0.62
   4   3   2   11.92    0.66
   4   3   2    9.57    0.66
   4   3   2   10.49    0.72
  -5  -3  -2   78.08    2.42
  -5  -3  -2   83.81    2.20
  -5  -3  -2   84.35    2.45
  -5  -3  -2   87.29    2.32
  -5  -3  -2   83.45    2.49
   5   3   2   85.44    2.34
   5   3   2   81.88    2.36
   5   3   2   87.49    2.37
   5   3   2   80.25    2.45
  -6  -3  -2    6.09    0.55
  -6  -3  -2    6.08    0.49
  -6  -3  -2    6.83    0.70
  -6  -3  -2    5.42    0.66
   6   3   2    5.56    0.71
   6   3   2    5.65    0.57
   6   3   2    5.35    0.55
   6   3   2    4.77    0.54
   6   3   2    6.03    0.58
  -7  -3  -2   70.96    2.09
  -7  -3  -2   70.63    2.00
  -7  -3  -2   73.32    2.40
  -7  -3  -2   74.73    2.48
   7   3   2   73.82    2.23
   7   3   2   71.49    2.23
   7   3   2   77.19    2.28
   7   3   2   72.21    2.45
  -8  -3  -2   32.19    1.55
  -8  -3  -2   31.99    1.54
  -8  -3  -2   31.10    1.12
   8   3   2   30.33    1.32
   8   3   2   30.35    1.35
   8   3   2   30.85    1.34
   8   3   2   30.17    1.51
  -9  -3  -2   18.85    1.31
  -9  -3  -2   17.21    1.33
   9   3   2   16.94    1.09
   9   3   2   16.75    1.32
   9   3   2   15.90    1.04
   9   3   2   15.11    1.04
 -10  -3  -2   14.01    1.46
  10   3   2   15.03    1.10
  10   3   2   17.03    1.47
 -11  -3  -2    1.33    0.84
  11   3   2    1.43    0.82
  11   3   2    1.67    0.63
 -12  -3  -2    1.29    0.88
  12   3   2    1.12    0.86
  12   3   2    0.97    0.87
  12   3   2    0.99    0.58
 -13  -3  -2    4.79    1.23
  13   3   2    5.01    1.27
  13   3   2    6.40    0.94
  13   3   2    7.97    1.38
   9  -4  -2   -0.37    0.72
   9  -4  -2    0.42    0.79
  -9   4   2    0.67    0.84
   8  -4  -2    1.42    0.74
   8  -4  -2    0.40    0.63
   8  -4  -2   -0.34    0.72
   8  -4  -2    0.86    0.69
  -8   4   2    0.72    0.75
   7  -4  -2    9.81    1.19
   7  -4  -2    7.55    0.99
   7  -4  -2    7.27    1.03
   7  -4  -2    7.77    1.01
   7  -4  -2    8.43    1.03
   7  -4  -2    9.39    1.06
  -7   4   2    8.79    1.18
   6  -4  -2   50.06    2.09
   6  -4  -2   50.64    2.06
   6  -4  -2   50.39    1.97
   6  -4  -2   49.10    2.07
   6  -4  -2   48.62    2.04
   6  -4  -2   51.06    2.05
   6  -4  -2   51.63    2.17
  -6   4   2   46.28    2.13
   5  -4  -2   10.38    0.97
   5  -4  -2   12.26    1.06
   5  -4  -2   10.99    1.02
   5  -4  -2   10.88    1.05
   5  -4  -2   11.76    1.06
   5  -4  -2   13.41    0.97
   5  -4  -2   12.36    1.07
  -5   4   2   10.99    1.09
   4  -4  -2   28.16    1.38
   4  -4  -2   32.74    1.40
   4  -4  -2   32.77    1.45
   4  -4  -2   33.81    1.48
   4  -4  -2   33.55    1.41
  -4   4   2   31.09    1.48
   3  -4  -2   34.75    1.33
   3  -4  -2   36.42    1.44
   3  -4  -2   35.44    1.43
   3  -4  -2   33.05    1.43
  -3   4   2   33.55    1.46
   2  -4  -2    2.16    0.50
   2  -4  -2    2.94    0.25
   2  -4  -2    3.23    0.43
   2  -4  -2    3.09    0.52
   2  -4  -2    2.47    0.24
   2  -4  -2    2.82    0.48
  -2   4   2    3.38    0.53
   1  -4  -2    0.48    0.35
   1  -4  -2    0.65    0.39
   1  -4  -2    0.60    0.21
   1  -4  -2    0.67    0.20
   1  -4  -2    0.66    0.24
   1  -4  -2    0.29    0.20
   1  -4  -2    0.66    0.37
  -1   4   2    0.96    0.40
   0  -4  -2   18.46    0.87
   0  -4  -2   20.01    0.95
   0  -4  -2   18.85    0.90
   0  -4  -2   19.07    0.62
   0  -4  -2   18.59    0.69
   0  -4  -2   17.77    0.71
   0  -4  -2   19.58    0.72
   0   4   2   18.42    0.58
   0   4   2   18.38    0.93
  -1  -4  -2    0.66    0.33
  -1  -4  -2    1.32    0.30
  -1  -4  -2    1.11    0.31
  -1  -4  -2    0.99    0.28
  -1  -4  -2    0.41    0.34
  -1  -4  -2    0.40    0.23
   1   4   2    1.02    0.33
   1   4   2    0.81    0.32
   1   4   2    1.01    0.26
  -2  -4  -2  200.85    5.02
  -2  -4  -2  201.19    4.91
  -2  -4  -2  203.69    4.94
  -2  -4  -2  195.54    4.91
  -2  -4  -2  209.75    5.02
   2   4   2  198.95    4.91
   2   4   2  213.48    5.01
   2   4   2  204.01    4.99
   2   4   2  203.90    4.90
  -3  -4  -2  116.46    2.99
  -3  -4  -2  114.92    3.00
  -3  -4  -2  117.54    3.00
  -3  -4  -2  118.74    3.00
  -3  -4  -2  113.80    3.06
   3   4   2  111.28    3.03
   3   4   2  113.86    3.00
   3   4   2  110.14    2.97
   3   4   2  111.28    2.97
  -4  -4  -2   26.80    1.10
  -4  -4  -2   23.53    1.06
  -4  -4  -2   25.88    1.06
  -4  -4  -2   25.77    0.99
  -4  -4  -2   27.80    1.06
   4   4   2   24.07    1.04
   4   4   2   25.81    1.04
   4   4   2   25.77    1.04
   4   4   2   27.11    1.13
  -5  -4  -2  128.26    3.59
  -5  -4  -2  127.68    3.37
  -5  -4  -2  130.67    3.61
  -5  -4  -2  137.10    3.53
  -5  -4  -2  133.69    3.49
  -5  -4  -2  131.74    3.58
   5   4   2  129.21    3.47
   5   4   2  136.33    3.55
   5   4   2  134.35    3.65
   5   4   2  142.58    3.56
  -6  -4  -2   14.81    0.84
  -6  -4  -2   15.04    0.74
  -6  -4  -2   13.89    0.96
  -6  -4  -2   14.24    0.93
  -6  -4  -2   15.97    0.86
  -6  -4  -2   14.87    0.94
   6   4   2   15.23    0.83
   6   4   2   15.28    0.98
   6   4   2   15.10    0.88
   6   4   2   14.52    0.86
  -7  -4  -2    0.36    0.47
  -7  -4  -2    0.69    0.31
  -7  -4  -2    0.62    0.44
  -7  -4  -2    0.38    0.33
   7   4   2   -0.64    0.31
   7   4   2    0.02    0.46
   7   4   2    0.37    0.34
   7   4   2    0.49    0.39
  -8  -4  -2    7.38    0.70
  -8  -4  -2    9.61    1.00
  -8  -4  -2    8.31    0.62
  -8  -4  -2    9.42    1.05
   8   4   2    8.91    0.82
   8   4   2    7.08    0.90
   8   4   2    7.53    0.78
   8   4   2    9.19    0.84
  -9  -4  -2    0.92    0.61
  -9  -4  -2    0.95    0.59
   9   4   2    0.57    0.45
   9   4   2    1.53    0.52
   9   4   2    0.78    0.56
   9   4   2    0.41    0.44
 -10  -4  -2   20.70    1.43
 -10  -4  -2   22.70    1.58
  10   4   2   22.02    1.32
  10   4   2   21.74    1.31
  10   4   2   18.51    1.40
 -11  -4  -2   22.60    1.71
  11   4   2   22.32    1.40
  11   4   2   22.90    1.69
 -12  -4  -2    1.07    0.82
  12   4   2    0.82    0.55
  12   4   2   -0.73    0.74
  12   4   2    0.51    0.81
 -13  -4  -2    9.79    1.56
  13   4   2   12.79    1.30
  13   4   2   14.86    1.77
  13   4   2   12.60    1.58
   9  -5  -2   15.74    1.66
  -9   5   2   12.09    1.59
   8  -5  -2   22.35    1.79
   8  -5  -2   23.15    1.73
  -8   5   2   25.66    2.12
   7  -5  -2    1.07    0.76
   7  -5  -2    2.63    0.78
   7  -5  -2    1.45    0.71
   7  -5  -2    2.20    0.73
   7  -5  -2    0.98    0.67
   7  -5  -2    1.04    0.84
  -7   5   2    1.83    0.84
   6  -5  -2    1.78    0.67
   6  -5  -2    3.29    0.72
   6  -5  -2    4.05    0.83
   6  -5  -2    3.02    0.73
   6  -5  -2    2.18    0.67
   6  -5  -2    3.05    0.77
   6  -5  -2    3.61    0.77
  -6   5   2    3.29    0.86
   5  -5  -2    1.36    0.53
   5  -5  -2    1.28    0.59
   5  -5  -2    0.53    0.55
   5  -5  -2    0.31    0.54
   5  -5  -2    1.51    0.55
   5  -5  -2    0.57    0.55
   5  -5  -2    1.54    0.58
  -5   5   2    0.58    0.61
   4  -5  -2    0.25    0.41
   4  -5  -2    0.24    0.45
   4  -5  -2    0.69    0.55
   4  -5  -2    0.26    0.47
   4  -5  -2   -0.10    0.44
  -4   5   2   -0.34    0.49
   3  -5  -2   35.63    1.39
   3  -5  -2   35.04    1.51
   3  -5  -2   34.43    1.50
   3  -5  -2   33.74    0.97
   3  -5  -2   35.62    1.61
   3  -5  -2   34.81    0.98
  -3   5   2   33.18    1.54
   2  -5  -2   31.25    1.44
   2  -5  -2   31.59    0.94
   2  -5  -2   31.79    1.37
   2  -5  -2   33.20    1.20
   2  -5  -2   32.65    0.98
   2  -5  -2   33.37    1.39
   2  -5  -2   31.45    0.98
  -2   5   2   32.71    1.41
   1  -5  -2   34.59    1.48
   1  -5  -2   35.49    1.13
   1  -5  -2   35.69    1.10
   1  -5  -2   34.40    1.08
   1  -5  -2   33.36    1.05
   1  -5  -2   33.59    1.38
   1  -5  -2   35.90    1.40
   0  -5  -2  138.22    3.44
   0  -5  -2  136.24    3.59
   0  -5  -2  141.72    3.72
   0  -5  -2  137.30    3.29
   0  -5  -2  138.73    3.43
   0  -5  -2  133.83    3.75
   0  -5  -2  136.79    3.40
   0   5   2  138.32    3.21
  -1  -5  -2   12.78    0.82
  -1  -5  -2   12.53    0.84
  -1  -5  -2   13.02    0.74
  -1  -5  -2   11.83    0.67
  -1  -5  -2   12.14    0.69
  -1  -5  -2   12.08    0.68
   1   5   2   13.44    0.63
   1   5   2   12.31    0.81
  -2  -5  -2   38.02    1.41
  -2  -5  -2   37.85    1.29
  -2  -5  -2   37.92    1.32
  -2  -5  -2   38.15    1.42
  -2  -5  -2   36.94    1.28
   2   5   2   37.63    1.26
   2   5   2   36.75    1.36
   2   5   2   38.00    1.38
  -3  -5  -2    1.09    0.36
  -3  -5  -2    1.02    0.38
  -3  -5  -2    1.05    0.36
  -3  -5  -2    1.08    0.39
  -3  -5  -2    1.01    0.37
   3   5   2    1.05    0.40
   3   5   2    1.26    0.45
   3   5   2    0.40    0.33
   3   5   2    0.68    0.34
  -4  -5  -2   25.42    1.07
  -4  -5  -2   22.75    1.07
  -4  -5  -2   23.17    1.06
  -4  -5  -2   24.35    1.09
  -4  -5  -2   25.72    1.18
   4   5   2   24.19    1.08
   4   5   2   26.16    1.10
   4   5   2   24.00    1.06
   4   5   2   25.46    1.15
  -5  -5  -2   53.99    1.86
  -5  -5  -2   55.46    1.74
  -5  -5  -2   55.32    1.88
  -5  -5  -2   52.35    1.79
  -5  -5  -2   56.22    1.83
   5   5   2   54.63    1.83
   5   5   2   54.48    1.79
   5   5   2   52.87    1.82
   5   5   2   57.42    1.93
  -6  -5  -2   83.51    2.54
  -6  -5  -2   81.67    2.46
  -6  -5  -2   82.59    2.58
  -6  -5  -2   79.31    2.32
  -6  -5  -2   82.98    2.46
  -6  -5  -2   79.88    2.54
   6   5   2   81.14    2.41
   6   5   2   79.32    2.48
   6   5   2   79.01    2.46
   6   5   2   80.52    2.57
  -7  -5  -2    3.23    0.60
  -7  -5  -2    3.19    0.55
  -7  -5  -2    3.07    0.61
  -7  -5  -2    2.12    0.59
  -7  -5  -2    2.75    0.46
   7   5   2    2.11    0.47
   7   5   2    2.75    0.67
   7   5   2    2.79    0.56
   7   5   2    2.90    0.55
  -8  -5  -2   64.13    2.38
  -8  -5  -2   64.54    2.14
  -8  -5  -2   66.77    1.99
  -8  -5  -2   61.62    2.34
   8   5   2   64.65    2.39
   8   5   2   65.81    2.26
   8   5   2   65.63    2.25
   8   5   2   62.30    2.13
  -9  -5  -2   23.27    1.48
  -9  -5  -2   25.45    1.21
  -9  -5  -2   23.57    1.50
   9   5   2   23.32    1.24
   9   5   2   24.61    1.53
   9   5   2   24.33    1.35
   9   5   2   22.17    1.32
 -10  -5  -2    0.12    0.65
 -10  -5  -2    1.19    0.42
 -10  -5  -2   -0.15    0.63
  10   5   2    1.39    0.57
  10   5   2    1.76    0.77
  10   5   2    0.55    0.50
 -11  -5  -2    2.39    0.84
 -11  -5  -2    5.30    1.06
  11   5   2    4.50    1.00
  11   5   2    2.79    0.71
  11   5   2    2.44    0.71
 -12  -5  -2    0.60    0.84
  12   5   2    0.13    0.57
  12   5   2    0.11    0.79
  12   5   2    0.50    0.79
 -13  -5  -2    2.73    1.11
  13   5   2    3.49    0.85
  13   5   2    2.54    1.05
  13   5   2    5.54    1.23
  -8   6   2    2.76    1.04
  -7   6   2    2.35    0.93
   6  -6  -2    5.22    0.96
   6  -6  -2    8.55    1.09
   6  -6  -2    5.99    0.95
   6  -6  -2    8.83    1.16
   6  -6  -2    6.10    1.03
   6  -6  -2    6.90    1.04
   6  -6  -2    8.97    1.14
  -6   6   2    7.72    1.13
   5  -6  -2   45.10    2.14
   5  -6  -2   46.92    2.14
   5  -6  -2   49.04    2.08
   5  -6  -2   49.33    2.13
   5  -6  -2   46.42    2.09
   5  -6  -2   48.80    2.14
   5  -6  -2   47.96    1.99
  -5   6   2   44.71    2.18
   4  -6  -2   10.38    0.96
   4  -6  -2   11.14    1.08
   4  -6  -2    9.94    1.06
   4  -6  -2   11.02    1.13
   4  -6  -2   10.13    1.14
  -4   6   2    9.16    1.07
   3  -6  -2   24.31    1.38
   3  -6  -2   26.22    1.47
   3  -6  -2   24.17    1.36
   3  -6  -2   23.13    0.83
   3  -6  -2   25.78    1.19
   3  -6  -2   25.48    1.39
   3  -6  -2   24.47    0.83
  -3   6   2   24.07    1.45
   2  -6  -2   20.93    0.83
   2  -6  -2   21.49    1.25
   2  -6  -2   23.41    1.34
   2  -6  -2   21.23    0.83
   2  -6  -2   22.65    1.24
   2  -6  -2   22.13    0.99
  -2   6   2   24.52    1.33
   1  -6  -2   -0.30    0.39
   1  -6  -2    0.10    0.25
   1  -6  -2    0.41    0.26
   1  -6  -2    0.02    0.42
   1  -6  -2    0.50    0.40
   1  -6  -2    0.14    0.26
   1  -6  -2    0.18    0.26
   0  -6  -2   12.15    0.71
   0  -6  -2   14.55    0.99
   0  -6  -2   13.35    0.72
   0  -6  -2   11.36    0.67
   0  -6  -2   13.09    0.83
   0  -6  -2   13.23    0.90
   0  -6  -2   14.35    0.54
  -1  -6  -2   34.16    1.23
  -1  -6  -2   32.64    1.39
  -1  -6  -2   33.81    1.27
  -1  -6  -2   34.28    1.20
  -1  -6  -2   33.84    1.46
  -1  -6  -2   31.27    1.20
   1   6   2   32.97    1.08
   1   6   2   34.49    1.44
  -2  -6  -2   20.19    0.97
  -2  -6  -2   23.43    0.99
  -2  -6  -2   20.21    1.11
  -2  -6  -2   21.73    1.05
  -2  -6  -2   21.81    1.01
   2   6   2   20.28    0.91
   2   6   2   22.27    1.10
  -3  -6  -2  124.20    3.50
  -3  -6  -2  129.98    3.55
  -3  -6  -2  124.47    3.38
  -3  -6  -2  125.72    3.36
  -3  -6  -2  130.48    3.42
   3   6   2  122.87    3.48
   3   6   2  122.13    3.34
   3   6   2  122.52    3.46
   3   6   2  131.51    3.39
  -4  -6  -2   43.20    1.55
  -4  -6  -2   39.73    1.54
  -4  -6  -2   43.72    1.57
  -4  -6  -2   44.37    1.68
  -4  -6  -2   41.28    1.58
   4   6   2   42.78    1.56
   4   6   2   43.56    1.54
   4   6   2   43.80    1.59
   4   6   2   46.28    1.67
  -5  -6  -2   26.77    1.22
  -5  -6  -2   26.91    1.24
  -5  -6  -2   24.91    1.18
  -5  -6  -2   26.92    1.30
  -5  -6  -2   27.41    1.19
   5   6   2   26.79    1.19
   5   6   2   23.64    1.18
   5   6   2   27.09    1.30
   5   6   2   25.33    1.22
  -6  -6  -2   44.90    1.67
  -6  -6  -2   43.50    1.74
  -6  -6  -2   42.67    1.61
  -6  -6  -2   42.93    1.55
  -6  -6  -2   43.53    1.67
  -6  -6  -2   42.40    1.68
   6   6   2   41.23    1.63
   6   6   2   40.75    1.59
   6   6   2   42.58    1.64
   6   6   2   42.73    1.72
  -7  -6  -2   -0.05    0.37
  -7  -6  -2    0.06    0.48
  -7  -6  -2   -0.44    0.41
  -7  -6  -2    0.42    0.41
  -7  -6  -2    0.73    0.44
   7   6   2    0.43    0.51
   7   6   2    0.06    0.42
   7   6   2    0.54    0.42
   7   6   2    0.52    0.40
  -8  -6  -2    5.57    0.84
  -8  -6  -2    5.81    0.65
  -8  -6  -2    5.33    0.70
  -8  -6  -2    4.85    0.77
  -8  -6  -2    5.26    0.82
   8   6   2    4.48    0.79
   8   6   2    5.13    0.69
   8   6   2    4.81    0.72
   8   6   2    4.87    0.75
  -9  -6  -2    6.99    0.99
  -9  -6  -2    5.48    0.93
  -9  -6  -2    5.85    0.75
   9   6   2    6.89    0.81
   9   6   2    6.37    0.84
   9   6   2    6.95    1.02
   9   6   2    6.85    0.92
 -10  -6  -2   -0.08    0.53
 -10  -6  -2    0.97    0.69
 -10  -6  -2   -0.23    0.42
  10   6   2   -0.03    0.63
  10   6   2    0.59    0.55
  10   6   2    0.27    0.53
 -11  -6  -2   30.70    1.86
 -11  -6  -2   35.72    1.97
  11   6   2   31.52    1.77
  11   6   2   32.45    1.75
  11   6   2   30.80    1.94
  11   6   2   33.41    1.91
 -12  -6  -2   33.99    2.12
 -12  -6  -2   36.30    2.17
  12   6   2   36.51    1.95
  12   6   2   36.05    1.95
  12   6   2   37.02    2.13
  12   6   2   35.56    2.17
 -13  -6  -2    0.79    0.87
  13   6   2    0.45    0.67
  13   6   2    0.50    0.90
  13   6   2    0.84    0.86
  -7   7   2   11.62    1.52
   6  -7  -2   -0.15    0.75
   6  -7  -2    0.11    0.68
   6  -7  -2    0.29    0.68
  -6   7   2    1.76    0.86
   5  -7  -2    0.30    0.67
   5  -7  -2    0.65    0.64
   5  -7  -2   -0.30    0.61
   5  -7  -2    1.50    0.78
   5  -7  -2    0.21    0.58
  -5   7   2    0.05    0.68
   4  -7  -2    2.40    0.76
   4  -7  -2    2.73    0.78
   4  -7  -2    0.61    0.62
   4  -7  -2    1.58    0.80
  -4   7   2    1.65    0.76
   3  -7  -2    2.34    0.76
   3  -7  -2    2.63    0.74
   3  -7  -2    2.58    0.70
   3  -7  -2    3.76    0.74
   3  -7  -2    1.47    0.33
   3  -7  -2    1.48    0.31
   2  -7  -2   72.35    2.01
   2  -7  -2   74.26    2.51
   2  -7  -2   67.80    2.00
   2  -7  -2   69.24    2.53
   2  -7  -2   75.36    2.71
   1  -7  -2   31.42    1.64
   1  -7  -2   30.29    1.41
   1  -7  -2   33.31    1.19
   1  -7  -2   34.10    1.59
   1  -7  -2   32.89    1.20
   0  -7  -2   11.43    0.75
   0  -7  -2   11.24    1.02
   0  -7  -2   12.65    1.10
   0  -7  -2   10.94    0.74
   0  -7  -2   12.44    0.78
   0  -7  -2   13.65    0.90
  -1  -7  -2   50.41    1.91
  -1  -7  -2   47.54    1.94
  -1  -7  -2   49.12    1.65
  -1  -7  -2   48.81    1.69
  -1  -7  -2   49.79    1.68
  -1  -7  -2   50.17    1.70
   1   7   2   50.05    1.45
   1   7   2   51.16    1.95
  -2  -7  -2    6.41    0.64
  -2  -7  -2    5.83    0.64
  -2  -7  -2    5.70    0.80
  -2  -7  -2    5.29    0.61
  -2  -7  -2    6.34    0.80
   2   7   2    5.37    0.55
   2   7   2    5.33    0.72
  -3  -7  -2    8.90    0.78
  -3  -7  -2   10.29    0.94
  -3  -7  -2   10.86    0.96
  -3  -7  -2   10.80    0.79
  -3  -7  -2    8.75    0.78
   3   7   2    9.99    0.77
   3   7   2   11.32    0.96
   3   7   2    9.68    0.88
  -4  -7  -2    0.34    0.40
  -4  -7  -2   -0.15    0.36
  -4  -7  -2   -0.75    0.37
  -4  -7  -2    0.46    0.40
  -4  -7  -2    0.11    0.35
   4   7   2    0.17    0.33
   4   7   2    0.00    0.43
   4   7   2   -0.31    0.30
   4   7   2    0.06    0.16
   4   7   2    0.24    0.38
  -5  -7  -2    0.72    0.45
  -5  -7  -2    1.99    0.51
  -5  -7  -2    1.42    0.49
  -5  -7  -2    1.86    0.49
  -5  -7  -2    1.34    0.53
   5   7   2    2.07    0.51
   5   7   2    1.50    0.46
   5   7   2    1.32    0.44
   5   7   2    1.30    0.55
  -6  -7  -2   39.05    1.71
  -6  -7  -2   36.25    1.57
  -6  -7  -2   36.62    1.58
  -6  -7  -2   38.01    1.57
  -6  -7  -2   39.82    1.63
   6   7   2   36.12    1.64
   6   7   2   39.06    1.59
   6   7   2   38.08    1.56
   6   7   2   38.58    1.61
  -7  -7  -2   41.38    1.77
  -7  -7  -2   35.76    1.52
  -7  -7  -2   38.83    1.79
  -7  -7  -2   38.30    1.63
  -7  -7  -2   36.98    1.25
  -7  -7  -2   35.33    1.61
   7   7   2   38.77    1.66
   7   7   2   38.33    1.60
   7   7   2   37.97    1.77
   7   7   2   36.82    1.65
  -8  -7  -2   -0.02    0.49
  -8  -7  -2    0.30    0.45
  -8  -7  -2    0.60    0.47
  -8  -7  -2    0.41    0.59
  -8  -7  -2    1.26    0.62
   8   7   2    0.57    0.51
   8   7   2   -0.06    0.45
   8   7   2    0.75    0.65
   8   7   2    0.39    0.45
  -9  -7  -2   39.31    1.89
  -9  -7  -2   38.33    1.90
  -9  -7  -2   36.98    1.69
   9   7   2   38.77    1.84
   9   7   2   36.64    1.79
   9   7   2   39.51    1.69
   9   7   2   35.83    1.94
 -10  -7  -2    6.65    1.07
 -10  -7  -2    6.97    0.90
 -10  -7  -2    7.84    1.07
  10   7   2    7.84    0.99
  10   7   2    8.68    1.17
  10   7   2   10.25    1.45
  10   7   2    8.72    1.05
 -11  -7  -2   -0.15    0.48
 -11  -7  -2    0.83    0.75
 -11  -7  -2    0.93    0.73
  11   7   2   -0.14    0.59
  11   7   2    0.19    0.56
  11   7   2   -0.07    0.53
  11   7   2    0.71    0.79
 -12  -7  -2    3.35    1.01
 -12  -7  -2    2.08    0.97
  12   7   2    4.81    1.12
  12   7   2    3.49    0.87
  12   7   2    1.39    0.71
  12   7   2    2.67    0.89
 -13  -7  -2    3.68    1.11
 -13  -7  -2    4.13    1.14
  13   7   2    3.44    1.07
  13   7   2    2.11    0.81
  13   7   2    3.46    0.93
  13   7   2    1.97    1.05
   6  -8  -2    6.43    1.27
   6  -8  -2    5.88    1.15
   6  -8  -2    5.08    1.11
  -6   8   2    7.29    1.29
   5  -8  -2    2.70    0.89
   5  -8  -2    2.44    0.83
   5  -8  -2    4.96    1.12
   5  -8  -2    3.75    0.95
   4  -8  -2   22.99    0.84
   4  -8  -2   25.31    1.79
   4  -8  -2   22.23    1.59
   4  -8  -2   22.63    1.64
   3  -8  -2    3.08    0.93
   3  -8  -2    3.29    0.86
   3  -8  -2    3.30    0.45
   3  -8  -2    4.29    0.87
   2  -8  -2    9.04    1.09
   2  -8  -2    8.44    0.68
   2  -8  -2    9.36    1.11
   2  -8  -2    8.36    1.17
   1  -8  -2    0.15    0.54
   1  -8  -2   -0.24    0.46
   1  -8  -2    0.42    0.66
   1  -8  -2   -0.31    0.35
   0  -8  -2    1.11    0.42
   0  -8  -2    0.55    0.41
   0  -8  -2    1.43    0.53
   0  -8  -2    1.25    0.58
   0  -8  -2    0.30    0.62
  -1  -8  -2    4.11    0.74
  -1  -8  -2    6.62    0.70
  -1  -8  -2    5.69    0.65
  -1  -8  -2    5.02    0.62
  -1  -8  -2    5.17    0.83
   1   8   2    5.70    0.43
  -2  -8  -2   16.36    1.00
  -2  -8  -2   15.73    0.99
  -2  -8  -2   16.71    1.20
  -2  -8  -2   18.68    1.20
  -2  -8  -2   16.48    0.98
   2   8   2   16.14    0.85
   2   8   2   13.91    1.18
  -3  -8  -2    3.68    0.61
  -3  -8  -2    5.41    0.66
  -3  -8  -2    5.03    0.78
  -3  -8  -2    4.45    0.77
  -3  -8  -2    5.50    0.68
   3   8   2    4.00    0.54
   3   8   2    4.76    0.70
  -4  -8  -2   35.40    1.55
  -4  -8  -2   41.67    1.55
  -4  -8  -2   39.33    1.72
  -4  -8  -2   37.97    1.74
  -4  -8  -2   40.34    1.64
   4   8   2   39.47    1.54
   4   8   2   38.67    1.74
   4   8   2   37.96    1.69
  -5  -8  -2   23.96    1.25
  -5  -8  -2   23.65    1.29
  -5  -8  -2   26.48    1.44
  -5  -8  -2   26.25    1.36
  -5  -8  -2   26.98    1.38
   5   8   2   22.86    1.33
   5   8   2   26.12    1.38
   5   8   2   25.86    1.30
  -6  -8  -2    1.76    0.57
  -6  -8  -2    1.04    0.52
  -6  -8  -2    1.05    0.52
  -6  -8  -2    1.40    0.60
  -6  -8  -2    1.66    0.52
   6   8   2    0.70    0.49
   6   8   2    1.30    0.53
   6   8   2   -0.07    0.44
   6   8   2    1.08    0.33
   6   8   2    1.00    0.61
  -7  -8  -2    0.69    0.62
  -7  -8  -2    0.10    0.41
  -7  -8  -2   -0.37    0.45
  -7  -8  -2    0.17    0.46
  -7  -8  -2    0.32    0.54
  -7  -8  -2    0.78    0.62
  -7  -8  -2    0.24    0.33
   7   8   2    0.39    0.48
   7   8   2   -0.11    0.34
   7   8   2   -0.48    0.39
   7   8   2    0.12    0.56
   7   8   2   -0.48    0.41
  -8  -8  -2    6.09    0.92
  -8  -8  -2    5.56    0.83
  -8  -8  -2    4.20    0.86
  -8  -8  -2    4.88    0.77
  -8  -8  -2    5.65    0.78
   8   8   2    4.36    0.76
   8   8   2    5.16    0.78
   8   8   2    4.46    0.90
   8   8   2    5.68    0.82
   8   8   2    3.31    0.64
  -9  -8  -2    4.81    0.91
  -9  -8  -2    3.72    0.76
  -9  -8  -2    3.13    0.87
  -9  -8  -2    3.55    0.78
   9   8   2    3.26    0.69
   9   8   2    4.12    0.75
   9   8   2    2.89    0.73
   9   8   2    4.42    0.92
   9   8   2    4.27    0.81
 -10  -8  -2   30.23    1.74
 -10  -8  -2   26.60    1.76
 -10  -8  -2   28.14    1.57
  10   8   2   33.06    1.96
  10   8   2   27.31    1.68
  10   8   2   29.66    1.69
  10   8   2   26.86    1.52
  10   8   2   27.35    1.57
 -11  -8  -2    3.72    0.97
 -11  -8  -2    4.38    0.80
 -11  -8  -2    3.81    0.98
  11   8   2    3.87    0.89
  11   8   2    4.84    0.92
  11   8   2    4.45    1.00
  11   8   2    5.64    0.98
 -12  -8  -2    9.23    1.35
 -12  -8  -2    9.88    1.45
 -12  -8  -2   13.00    1.21
  12   8   2    9.72    1.25
  12   8   2   11.64    1.55
  12   8   2    7.57    1.13
  12   8   2   10.37    1.34
 -13  -8  -2   10.60    1.52
 -13  -8  -2   11.25    1.59
  13   8   2   10.18    1.32
  13   8   2   12.45    1.52
  13   8   2   11.14    1.56
  13   8   2   11.75    1.39
   5  -9  -2    0.03    0.76
   5  -9  -2    1.40    1.01
   5  -9  -2    0.56    0.89
   4  -9  -2    1.08    0.33
   4  -9  -2    0.77    0.91
   4  -9  -2    1.01    0.87
   4  -9  -2    2.72    0.86
   3  -9  -2   14.02    1.58
   3  -9  -2   13.85    1.52
   3  -9  -2   15.87    1.51
   3  -9  -2   13.72    0.83
   2  -9  -2   -0.27    0.72
   2  -9  -2    1.91    0.77
   2  -9  -2    0.07    0.38
   2  -9  -2    1.09    0.78
   1  -9  -2   34.10    1.40
   1  -9  -2   31.33    1.76
   1  -9  -2   36.13    1.96
   1  -9  -2   35.78    2.03
   0  -9  -2   21.14    1.48
   0  -9  -2   21.67    1.54
   0  -9  -2   23.39    1.48
   0  -9  -2   22.61    1.15
  -1  -9  -2    1.32    0.67
  -1  -9  -2    1.79    0.72
  -1  -9  -2    0.84    0.47
  -1  -9  -2    0.24    0.48
  -2  -9  -2    1.43    0.50
  -2  -9  -2    0.83    0.62
  -2  -9  -2    2.00    0.75
  -2  -9  -2    1.87    0.53
  -2  -9  -2    1.50    0.54
   2   9   2    1.21    0.65
   2   9   2    1.83    0.39
  -3  -9  -2    1.10    0.65
  -3  -9  -2    1.04    0.52
  -3  -9  -2    2.23    0.73
  -3  -9  -2    1.87    0.55
  -3  -9  -2    1.89    0.53
   3   9   2    1.04    0.62
   3   9   2    1.25    0.45
  -4  -9  -2    1.75    0.57
  -4  -9  -2    2.40    0.54
  -4  -9  -2    1.50    0.57
  -4  -9  -2    1.61    0.60
  -4  -9  -2    1.16    0.65
   4   9   2    1.28    0.49
   4   9   2    1.39    0.65
  -5  -9  -2   53.25    2.10
  -5  -9  -2   52.55    2.25
  -5  -9  -2   53.16    2.00
  -5  -9  -2   52.37    2.18
  -5  -9  -2   56.64    2.13
   5   9   2   56.26    2.03
   5   9   2   50.76    2.12
   5   9   2   57.22    2.26
  -6  -9  -2   16.07    1.21
  -6  -9  -2   12.33    1.11
  -6  -9  -2   13.63    1.09
  -6  -9  -2   14.96    1.18
  -6  -9  -2   12.23    1.18
   6   9   2   13.58    1.27
   6   9   2   14.21    1.15
   6   9   2   14.31    1.23
  -7  -9  -2   37.19    1.75
  -7  -9  -2   38.65    1.78
  -7  -9  -2   37.00    1.85
  -7  -9  -2   32.44    1.78
  -7  -9  -2   38.19    1.80
  -7  -9  -2   38.65    1.53
   7   9   2   34.47    1.70
   7   9   2   41.08    1.97
   7   9   2   36.68    1.73
  -8  -9  -2   39.25    1.95
  -8  -9  -2   47.09    2.21
  -8  -9  -2   44.45    1.96
  -8  -9  -2   47.02    2.00
  -8  -9  -2   43.87    1.95
   8   9   2   43.76    2.14
   8   9   2   44.43    2.00
   8   9   2   44.30    1.96
  -9  -9  -2   -0.34    0.54
  -9  -9  -2    0.66    0.70
  -9  -9  -2    1.34    0.75
  -9  -9  -2    0.50    0.57
   9   9   2    0.22    0.57
   9   9   2    0.60    0.58
   9   9   2   -0.13    0.72
 -10  -9  -2    6.18    1.11
 -10  -9  -2    5.16    0.98
 -10  -9  -2    3.18    0.80
  10   9   2    4.64    0.91
  10   9   2    3.94    0.97
  10   9   2    4.30    0.84
 -11  -9  -2   -0.60    0.65
 -11  -9  -2    0.87    0.80
 -11  -9  -2   -0.28    0.59
  11   9   2   -1.35    0.73
  11   9   2    0.10    0.63
  11   9   2    0.79    0.67
 -12  -9  -2    1.15    0.87
 -12  -9  -2    1.15    0.85
 -12  -9  -2    0.19    0.61
  12   9   2    0.16    0.75
  12   9   2    1.72    0.80
  12   9   2    0.64    0.93
 -13  -9  -2    9.21    1.47
 -13  -9  -2    8.87    1.41
  13   9   2   14.29    1.53
  13   9   2    9.06    1.61
  13   9   2    7.88    1.34
  13   9   2    8.08    1.48
   4 -10  -2    1.46    0.94
   4 -10  -2    1.18    0.34
   4 -10  -2    2.49    1.09
   3 -10  -2    7.21    1.20
   3 -10  -2    7.12    1.26
   3 -10  -2   10.20    1.45
   3 -10  -2    8.27    0.72
   2 -10  -2    8.31    0.78
   2 -10  -2    7.76    1.25
   2 -10  -2    6.23    1.24
   2 -10  -2    6.29    1.14
   1 -10  -2    2.01    0.81
   1 -10  -2    3.70    1.04
   1 -10  -2    3.95    0.97
   1 -10  -2    2.87    0.57
   0 -10  -2   10.27    1.22
   0 -10  -2   11.08    1.27
   0 -10  -2   10.59    1.33
   0 -10  -2   13.12    1.00
  -1 -10  -2    4.25    0.97
  -1 -10  -2    4.01    0.91
  -1 -10  -2    4.11    0.70
  -1 -10  -2    5.39    0.98
  -2 -10  -2   24.25    1.56
  -2 -10  -2   24.27    1.37
  -2 -10  -2   24.65    1.35
  -2 -10  -2   21.99    1.55
  -2 -10  -2   27.02    1.73
   2  10   2   25.12    1.64
  -3 -10  -2   51.23    2.08
  -3 -10  -2   56.62    2.11
  -3 -10  -2   56.61    2.38
  -3 -10  -2   49.17    2.32
   3  10   2   56.49    2.40
   3  10   2   55.44    1.87
  -4 -10  -2    2.27    0.62
  -4 -10  -2    0.35    0.66
  -4 -10  -2    3.12    0.71
  -4 -10  -2    1.86    0.62
  -4 -10  -2    1.73    0.76
   4  10   2    0.87    0.50
   4  10   2    1.89    0.78
  -5 -10  -2   31.22    1.78
  -5 -10  -2   27.32    1.54
  -5 -10  -2   32.39    1.76
  -5 -10  -2   28.57    1.48
  -5 -10  -2   28.71    1.60
  -5 -10  -2   29.38    1.55
   5  10   2   27.47    1.63
   5  10   2   30.76    1.49
  -6 -10  -2   15.20    1.20
  -6 -10  -2   14.07    1.22
  -6 -10  -2   14.95    1.25
  -6 -10  -2   15.16    1.39
  -6 -10  -2   13.22    1.31
  -6 -10  -2   11.61    1.16
   6  10   2   13.74    1.33
   6  10   2   13.21    1.24
   6  10   2   13.74    1.16
  -7 -10  -2    0.07    0.49
  -7 -10  -2    1.03    0.59
  -7 -10  -2   -1.11    0.61
  -7 -10  -2   -0.21    0.56
  -7 -10  -2    0.21    0.57
  -7 -10  -2    0.30    0.64
   7  10   2   -0.23    0.67
   7  10   2    1.44    0.65
   7  10   2   -0.26    0.49
  -8 -10  -2    2.05    0.71
  -8 -10  -2    1.16    0.63
  -8 -10  -2    1.55    0.87
  -8 -10  -2    1.59    0.70
  -8 -10  -2    2.30    0.75
   8  10   2    1.98    0.75
   8  10   2    1.65    0.67
   8  10   2    2.68    0.84
  -9 -10  -2    5.16    0.89
  -9 -10  -2    3.31    0.96
  -9 -10  -2    3.89    0.92
  -9 -10  -2    5.22    0.90
  -9 -10  -2    4.22    0.87
   9  10   2    4.49    1.06
   9  10   2    6.31    0.99
   9  10   2    4.82    0.91
 -10 -10  -2    8.11    1.10
 -10 -10  -2    8.49    1.12
 -10 -10  -2    8.82    1.23
 -10 -10  -2    7.77    1.28
  10  10   2   10.27    1.42
  10  10   2    9.56    1.12
  10  10   2    8.48    1.13
 -11 -10  -2   36.08    2.20
 -11 -10  -2   32.25    1.90
 -11 -10  -2   33.67    2.03
  11  10   2   35.30    2.02
  11  10   2   37.09    2.24
 -12 -10  -2    7.45    1.10
 -12 -10  -2    5.87    1.16
 -12 -10  -2    5.14    1.19
  12  10   2    6.24    1.12
  12  10   2    5.45    1.27
 -13 -10  -2    3.00    0.86
 -13 -10  -2    2.84    1.11
 -13 -10  -2    3.36    1.11
  13  10   2    0.93    0.83
  13  10   2    2.93    1.22
   3 -11  -2    7.24    1.39
   3 -11  -2    8.18    1.49
   3 -11  -2    6.68    0.70
   2 -11  -2   17.48    1.11
   2 -11  -2   19.02    1.93
   2 -11  -2   16.92    1.80
   2 -11  -2   17.09    1.72
   1 -11  -2    1.27    0.53
   1 -11  -2    1.82    0.94
   1 -11  -2    0.92    0.92
   1 -11  -2    2.03    0.96
   0 -11  -2   19.07    1.86
   0 -11  -2   17.53    1.67
   0 -11  -2   16.15    1.16
   0 -11  -2   18.49    1.69
  -1 -11  -2   15.18    1.23
  -1 -11  -2   15.22    1.61
  -1 -11  -2   14.66    1.52
  -1 -11  -2   15.59    1.55
  -2 -11  -2   -0.22    0.69
  -2 -11  -2    1.42    0.80
  -2 -11  -2    0.92    0.80
  -2 -11  -2    1.05    0.57
  -3 -11  -2    1.02    0.63
  -3 -11  -2    0.89    0.61
  -3 -11  -2    0.92    0.79
  -3 -11  -2   -0.13    0.66
  -3 -11  -2    1.00    0.72
   3  11   2    0.51    0.73
  -4 -11  -2    0.69    0.58
  -4 -11  -2    1.14    0.83
  -4 -11  -2    0.95    0.61
  -4 -11  -2    0.57    0.65
  -4 -11  -2    0.35    0.71
   4  11   2    0.27    0.69
   4  11   2   -0.33    0.44
  -5 -11  -2    6.83    0.98
  -5 -11  -2    3.96    0.82
  -5 -11  -2    4.47    1.00
  -5 -11  -2    3.21    0.79
  -5 -11  -2    4.59    1.01
   5  11   2    5.21    1.03
   5  11   2    5.47    0.78
  -6 -11  -2   39.80    2.15
  -6 -11  -2   39.08    1.95
  -6 -11  -2   41.51    2.32
  -6 -11  -2   43.00    2.05
  -6 -11  -2   37.76    1.86
  -6 -11  -2   40.77    2.13
   6  11   2   42.17    1.89
   6  11   2   39.61    2.13
  -7 -11  -2   15.55    1.54
  -7 -11  -2   12.81    1.37
  -7 -11  -2   14.09    1.30
  -7 -11  -2   16.88    1.45
  -7 -11  -2   15.90    1.29
  -7 -11  -2   14.03    1.40
   7  11   2   15.16    1.34
   7  11   2   10.88    1.34
  -8 -11  -2   19.54    1.44
  -8 -11  -2   16.59    1.29
  -8 -11  -2   17.87    1.73
  -8 -11  -2   19.64    1.48
  -8 -11  -2   18.08    1.52
   8  11   2   19.84    1.77
   8  11   2   16.67    1.50
   8  11   2   16.98    1.40
  -9 -11  -2   16.27    1.43
  -9 -11  -2   15.53    1.65
  -9 -11  -2   15.87    1.47
  -9 -11  -2   13.53    1.37
  -9 -11  -2   16.00    1.53
   9  11   2   16.72    1.51
   9  11   2   14.48    1.58
   9  11   2   15.81    1.41
 -10 -11  -2    1.42    0.74
 -10 -11  -2    1.26    0.82
 -10 -11  -2    1.34    0.75
 -10 -11  -2    0.41    0.90
  10  11   2    1.19    0.75
  10  11   2    1.20    0.73
  10  11   2    1.64    0.94
 -11 -11  -2    0.34    0.89
 -11 -11  -2    1.28    0.72
 -11 -11  -2   -0.35    0.71
  11  11   2    0.01    0.74
  11  11   2    1.29    1.01
 -12 -11  -2    1.52    0.86
 -12 -11  -2    1.51    0.99
 -12 -11  -2   -0.31    0.65
  12  11   2    0.25    0.77
  12  11   2    0.00    0.94
   2 -12  -2    6.03    1.47
   2 -12  -2    4.40    1.27
   1 -12  -2    1.48    1.04
   1 -12  -2    0.28    0.54
   1 -12  -2   -1.22    0.72
   1 -12  -2    1.06    1.01
   0 -12  -2    2.94    1.09
   0 -12  -2    1.75    0.63
   0 -12  -2    3.58    1.06
   0 -12  -2    1.57    0.90
  -1 -12  -2   14.31    1.27
  -1 -12  -2   14.93    1.66
  -1 -12  -2   15.27    1.72
  -1 -12  -2   12.36    1.50
  -2 -12  -2    4.96    1.19
  -2 -12  -2    5.24    0.90
  -2 -12  -2    6.40    1.22
  -2 -12  -2    7.24    1.23
  -3 -12  -2   12.73    1.51
  -3 -12  -2   11.25    1.48
  -3 -12  -2   11.29    1.17
  -3 -12  -2   10.56    1.36
  -3 -12  -2    9.79    1.16
  -4 -12  -2   31.23    2.00
  -4 -12  -2   30.57    1.76
  -4 -12  -2   32.36    2.07
  -4 -12  -2   28.08    1.75
  -4 -12  -2   34.44    2.00
   4  12   2   32.07    2.08
  -5 -12  -2    2.19    0.82
  -5 -12  -2    1.47    0.70
  -5 -12  -2    1.31    0.88
  -5 -12  -2    0.98    0.84
  -5 -12  -2    1.33    0.78
   5  12   2   -0.23    0.72
   5  12   2    1.38    0.57
  -6 -12  -2    2.56    0.83
  -6 -12  -2    5.61    0.98
  -6 -12  -2    4.13    0.92
  -6 -12  -2    6.02    1.12
  -6 -12  -2    5.66    1.16
   6  12   2    2.84    0.75
   6  12   2    5.60    1.17
  -7 -12  -2    0.25    0.82
  -7 -12  -2   -0.55    0.80
  -7 -12  -2    0.53    0.66
  -7 -12  -2    1.25    1.03
  -7 -12  -2   -0.33    0.65
   7  12   2   -1.32    0.71
   7  12   2   -0.43    0.58
  -8 -12  -2    0.10    0.67
  -8 -12  -2   -0.16    0.82
  -8 -12  -2    1.41    0.86
   8  12   2   -0.26    0.84
   8  12   2   -0.17    0.58
  -9 -12  -2   17.31    1.68
  -9 -12  -2   16.40    1.80
  -9 -12  -2   15.20    1.50
  -9 -12  -2   18.78    2.03
   9  12   2   15.26    1.49
   9  12   2   18.34    1.83
 -10 -12  -2    4.48    1.01
 -10 -12  -2    6.65    1.16
 -10 -12  -2    5.85    1.25
  10  12   2    6.11    1.31
  10  12   2    6.26    1.09
  10  12   2    3.65    1.00
 -11 -12  -2    1.57    0.85
 -11 -12  -2   -0.40    0.94
  11  12   2    2.23    0.84
  11  12   2    1.39    1.02
 -12 -12  -2   23.13    1.94
 -12 -12  -2   19.44    2.00
  12  12   2   17.46    2.01
  12  12   2   19.11    1.80
   0 -13  -2    1.67    1.04
   0 -13  -2    5.85    1.29
   0 -13  -2    5.51    1.42
   0 -13  -2    3.06    0.76
  -1 -13  -2    2.73    1.09
  -1 -13  -2    3.09    0.81
  -1 -13  -2    4.13    1.28
  -1 -13  -2    4.52    1.14
  -2 -13  -2    3.41    0.84
  -2 -13  -2    2.52    1.15
  -2 -13  -2    0.45    0.91
  -2 -13  -2    3.56    1.13
  -3 -13  -2    0.11    0.86
  -3 -13  -2    1.41    0.73
  -3 -13  -2    0.54    0.93
  -3 -13  -2    0.84    0.98
  -4 -13  -2    3.53    0.92
  -4 -13  -2    4.65    1.10
  -4 -13  -2    4.61    0.93
  -4 -13  -2    3.85    1.23
  -4 -13  -2    5.75    1.20
   4  13   2    4.18    1.11
  -5 -13  -2    7.90    1.17
  -5 -13  -2   10.41    1.25
  -5 -13  -2   10.03    1.52
  -5 -13  -2   10.50    1.35
  -5 -13  -2    9.53    1.46
   5  13   2    9.32    1.47
  -6 -13  -2    1.09    0.77
  -6 -13  -2    2.90    1.06
  -6 -13  -2    2.55    0.90
  -6 -13  -2    2.98    0.89
  -6 -13  -2    3.80    1.11
   6  13   2    1.35    0.99
   6  13   2    3.13    0.73
  -7 -13  -2   20.12    1.71
  -7 -13  -2   20.04    1.98
  -7 -13  -2   18.00    1.80
   7  13   2   16.46    1.72
   7  13   2   17.85    1.51
  -8 -13  -2    6.36    1.26
  -8 -13  -2    4.85    1.23
  -8 -13  -2    5.99    1.12
   8  13   2    4.66    1.27
   8  13   2    4.69    0.97
  -9 -13  -2    5.98    1.36
  -9 -13  -2    6.89    1.20
  -9 -13  -2    7.11    1.30
   9  13   2    7.09    1.17
   9  13   2    7.37    1.43
 -10 -13  -2    4.25    1.26
 -10 -13  -2    4.55    1.07
  10  13   2    4.80    1.31
  10  13   2    6.15    1.13
 -11 -13  -2    0.97    1.04
 -11 -13  -2    0.58    0.85
  11  13   2    0.21    1.01
  11  13   2    0.00    0.74
  -3 -14  -2    5.24    1.05
  -3 -14  -2    5.93    1.46
  -3 -14  -2    6.50    1.32
  -3 -14  -2    5.13    1.25
  -4 -14  -2    4.40    1.36
  -4 -14  -2    2.87    0.89
  -4 -14  -2    1.20    0.98
  -4 -14  -2    2.79    1.07
  -5 -14  -2    6.94    1.32
  -5 -14  -2    7.68    1.21
  -5 -14  -2    7.28    1.41
  -5 -14  -2    5.97    1.36
  -5 -14  -2    7.28    1.16
   5  14   2    7.95    1.47
  -6 -14  -2    0.63    0.79
  -6 -14  -2    1.10    0.87
  -6 -14  -2    1.51    1.12
  -6 -14  -2    1.04    0.85
  -6 -14  -2    0.02    0.90
   6  14   2    2.21    1.09
  -7 -14  -2    1.19    0.80
  -7 -14  -2   -0.02    0.97
  -7 -14  -2   -0.79    0.89
   7  14   2   -1.14    0.80
   7  14   2    0.40    0.68
  -8 -14  -2    1.27    0.97
  -8 -14  -2    1.61    0.93
  -8 -14  -2    4.93    1.35
   8  14   2    3.59    0.97
   8  14   2    3.65    1.20
  -9 -14  -2    1.21    0.89
  -9 -14  -2    1.78    0.99
  -9 -14  -2    1.55    1.07
   9  14   2   -0.10    0.71
   9  14   2    0.69    0.99
   9  14  -3   20.54    2.14
   9  14  -3   23.38    1.76
  -9 -14   3   23.65    2.00
  -9 -14   3   24.33    2.26
  -9 -14   3   23.76    2.27
   8  14  -3    2.67    0.85
   8  14  -3    3.15    1.23
  -8 -14   3    3.45    1.01
  -8 -14   3    2.54    1.14
  -8 -14   3    2.67    1.18
   7  14  -3   -0.18    1.00
   7  14  -3    1.29    0.71
  -7 -14   3    2.28    1.11
  -7 -14   3    4.51    1.22
  -7 -14   3    3.08    0.99
   6  14  -3    0.46    1.03
  -6 -14   3    2.21    0.98
  -6 -14   3    1.17    0.87
  -6 -14   3    0.50    0.97
  -6 -14   3    0.64    0.99
  -6 -14   3    0.64    0.80
   5  14  -3    2.14    1.12
  -5 -14   3    0.80    1.00
  -5 -14   3    0.45    1.02
  -5 -14   3   -0.01    0.79
  -5 -14   3    1.16    0.83
  -5 -14   3    0.41    0.95
  -4 -14   3    2.27    0.93
  -4 -14   3    6.79    1.32
  -4 -14   3    4.19    1.23
  -4 -14   3    1.93    1.17
  -3 -14   3   14.09    1.78
  -3 -14   3   10.16    1.65
  -3 -14   3   13.98    1.75
  -3 -14   3   13.80    1.45
  11  13  -3    9.35    1.38
  11  13  -3    6.21    1.39
 -11 -13   3    8.65    1.35
 -11 -13   3    9.37    1.58
  10  13  -3    0.18    0.96
  10  13  -3    1.36    0.85
 -10 -13   3    1.27    0.80
 -10 -13   3    0.56    1.04
   9  13  -3    2.96    1.13
   9  13  -3    2.89    0.89
  -9 -13   3    1.56    1.07
  -9 -13   3    1.73    1.01
  -9 -13   3    2.36    0.89
   8  13  -3    6.42    1.05
   8  13  -3    5.32    1.28
  -8 -13   3    4.13    1.03
  -8 -13   3    8.23    1.37
  -8 -13   3    8.18    1.45
   7  13  -3    1.23    0.69
   7  13  -3    1.17    1.01
  -7 -13   3    1.37    1.00
  -7 -13   3    1.78    0.84
  -7 -13   3    0.04    0.90
   6  13  -3   22.20    2.07
   6  13  -3   23.27    1.53
  -6 -13   3   24.38    1.92
  -6 -13   3   24.56    2.11
  -6 -13   3   26.58    1.79
  -6 -13   3   28.99    2.13
  -6 -13   3   25.10    1.76
   5  13  -3    7.82    1.38
  -5 -13   3    7.11    1.14
  -5 -13   3    9.03    1.39
  -5 -13   3   10.34    1.26
  -5 -13   3   10.52    1.37
  -5 -13   3   10.41    1.54
   4  13  -3    5.41    1.27
  -4 -13   3    4.55    1.16
  -4 -13   3    6.75    1.08
  -4 -13   3    6.69    1.22
  -4 -13   3    3.54    0.90
  -4 -13   3    6.38    1.30
  -3 -13   3    8.68    1.36
  -3 -13   3    8.74    1.16
  -3 -13   3    8.77    1.43
  -3 -13   3    9.74    1.43
  -2 -13   3    0.42    1.03
  -2 -13   3    1.00    0.92
  -2 -13   3   -0.85    0.64
  -2 -13   3    0.76    0.90
  -1 -13   3    0.13    0.62
  -1 -13   3    1.53    0.98
  -1 -13   3   -0.03    0.89
  -1 -13   3    0.60    1.08
   0 -13   3    5.60    1.34
   0 -13   3    4.76    1.36
   0 -13   3    4.52    0.86
  12  12  -3   -0.03    0.75
  12  12  -3   -1.18    0.93
 -12 -12   3    0.15    1.02
 -12 -12   3   -0.75    0.70
  11  12  -3   13.34    1.48
  11  12  -3   11.95    1.66
 -11 -12   3   13.91    1.78
 -11 -12   3   13.90    1.49
  10  12  -3   12.74    1.41
  10  12  -3   12.95    1.71
 -10 -12   3   10.64    1.34
 -10 -12   3   13.60    1.68
   9  12  -3    8.67    1.20
   9  12  -3    9.77    1.52
  -9 -12   3    9.85    1.28
  -9 -12   3    7.41    1.38
  -9 -12   3    8.59    1.33
   8  12  -3   16.24    1.74
   8  12  -3   17.55    1.53
  -8 -12   3   20.41    1.69
  -8 -12   3   18.02    1.75
  -8 -12   3   18.20    1.85
   7  12  -3    0.83    0.64
   7  12  -3    0.41    0.80
  -7 -12   3   -0.76    0.76
  -7 -12   3    0.67    0.71
  -7 -12   3   -0.01    0.80
   6  12  -3    0.87    0.84
   6  12  -3    1.88    0.67
  -6 -12   3    0.76    0.85
  -6 -12   3    1.56    0.74
  -6 -12   3    1.52    0.77
  -6 -12   3    1.71    0.76
  -6 -12   3    1.90    0.91
   5  12  -3    3.37    0.69
   5  12  -3    1.53    0.92
  -5 -12   3    1.15    0.70
  -5 -12   3    1.39    0.72
  -5 -12   3    2.63    0.88
  -5 -12   3    1.82    0.90
  -5 -12   3    1.57    0.87
   4  12  -3    0.59    0.84
  -4 -12   3    0.81    0.64
  -4 -12   3   -0.44    0.58
  -4 -12   3    1.33    0.81
  -4 -12   3    1.41    0.90
  -4 -12   3    1.03    0.88
  -3 -12   3   20.99    1.82
  -3 -12   3   19.98    1.56
  -3 -12   3   22.05    1.85
  -3 -12   3   19.53    1.48
  -3 -12   3   16.73    1.73
  -2 -12   3   23.82    1.80
  -2 -12   3   17.86    1.73
  -2 -12   3   22.46    2.02
  -2 -12   3   24.36    1.55
  -1 -12   3    1.18    0.87
  -1 -12   3    1.39    0.98
  -1 -12   3    1.03    0.63
  -1 -12   3    2.35    0.98
   0 -12   3   11.60    1.49
   0 -12   3   13.52    1.52
   0 -12   3   12.02    1.16
   0 -12   3   12.09    1.67
   1 -12   3    1.95    1.13
   1 -12   3    3.38    1.12
   1 -12   3    1.91    0.69
  12  11  -3    1.07    1.10
  12  11  -3    0.70    0.81
 -12 -11   3    1.51    1.07
 -12 -11   3    0.47    0.74
  11  11  -3    1.49    0.82
  11  11  -3    0.65    0.95
 -11 -11   3    0.61    0.97
 -11 -11   3    1.28    0.79
  10  11  -3   -0.07    0.63
  10  11  -3   -0.75    0.73
 -10 -11   3    0.49    0.67
 -10 -11   3   -1.28    0.80
   9  11  -3    1.01    0.65
   9  11  -3    2.51    0.96
  -9 -11   3    0.21    0.76
  -9 -11   3    1.10    0.68
  -9 -11   3    1.85    0.88
   8  11  -3   14.06    1.35
   8  11  -3   10.65    1.37
  -8 -11   3   10.99    1.41
  -8 -11   3   13.79    1.48
  -8 -11   3   10.29    1.26
   7  11  -3   32.35    2.01
   7  11  -3   33.37    1.75
  -7 -11   3   33.35    2.00
  -7 -11   3   32.68    1.87
  -7 -11   3   32.97    2.00
   6  11  -3    0.39    0.56
   6  11  -3    0.90    0.75
  -6 -11   3    1.48    0.68
  -6 -11   3    0.48    0.64
  -6 -11   3    0.59    0.62
  -6 -11   3    0.66    0.78
  -6 -11   3    0.78    0.82
   5  11  -3   27.73    1.87
   5  11  -3   28.63    1.50
  -5 -11   3   28.08    1.82
  -5 -11   3   26.41    1.63
  -5 -11   3   29.81    1.67
  -5 -11   3   26.92    1.60
  -5 -11   3   28.83    1.84
   4  11  -3   15.03    1.59
   4  11  -3   19.40    1.19
  -4 -11   3   20.42    1.64
  -4 -11   3   17.64    1.35
  -4 -11   3   18.61    1.40
  -4 -11   3   18.28    1.41
  -4 -11   3   20.11    1.58
   3  11  -3    0.32    0.73
  -3 -11   3   -0.70    0.49
  -3 -11   3   -0.03    0.63
  -3 -11   3    0.39    0.77
  -3 -11   3    0.17    0.71
  -3 -11   3    0.85    0.60
  -2 -11   3    1.17    0.60
  -2 -11   3    0.04    0.55
  -2 -11   3   -0.08    0.75
  -2 -11   3    2.14    0.83
  -2 -11   3    1.08    0.79
  -1 -11   3    7.46    1.18
  -1 -11   3    6.63    1.24
  -1 -11   3    5.67    1.04
  -1 -11   3    6.60    0.87
   0 -11   3    2.62    0.63
   0 -11   3    2.50    0.97
   0 -11   3    2.07    0.97
   0 -11   3    2.72    0.90
   1 -11   3   17.44    1.77
   1 -11   3   18.56    1.83
   1 -11   3   17.24    1.16
   1 -11   3   17.02    1.59
   2 -11   3    4.45    1.15
   2 -11   3    3.24    1.11
   2 -11   3    3.33    0.67
   3 -11   3   12.32    1.66
   3 -11   3    9.85    0.85
   3 -11   3    8.66    1.51
  13  10  -3    1.28    1.05
  13  10  -3    2.88    0.95
 -13 -10   3    1.17    1.05
 -13 -10   3    1.12    0.96
  12  10  -3   10.13    1.35
  12  10  -3   10.62    1.48
 -12 -10   3    8.72    1.48
 -12 -10   3   12.24    1.28
 -12 -10   3    9.46    1.36
  11  10  -3    0.28    0.71
  11  10  -3    1.23    0.96
 -11 -10   3   -0.28    0.68
 -11 -10   3    1.70    0.91
 -11 -10   3    0.55    0.65
  10  10  -3   33.94    1.97
  10  10  -3   32.21    2.12
 -10 -10   3   36.75    2.19
 -10 -10   3   35.51    1.94
 -10 -10   3   35.90    1.95
   9  10  -3   33.25    1.70
   9  10  -3   34.42    2.04
   9  10  -3   31.29    1.82
  -9 -10   3   28.71    1.69
  -9 -10   3   32.77    1.85
  -9 -10   3   32.33    1.81
  -9 -10   3   32.17    2.00
   8  10  -3    0.96    0.64
   8  10  -3    1.17    0.73
  -8 -10   3    0.58    0.79
  -8 -10   3    0.06    0.57
  -8 -10   3    0.76    0.68
  -8 -10   3    0.71    0.55
  -8 -10   3    0.35    0.59
   7  10  -3    3.95    0.90
   7  10  -3    4.70    0.84
  -7 -10   3    2.84    0.74
  -7 -10   3    4.51    0.83
  -7 -10   3    3.72    0.80
  -7 -10   3    4.05    1.01
  -7 -10   3    3.67    0.91
   6  10  -3    0.49    0.73
   6  10  -3    0.88    0.57
  -6 -10   3    0.77    0.70
  -6 -10   3    1.08    0.58
  -6 -10   3    0.60    0.58
  -6 -10   3    0.24    0.59
  -6 -10   3    1.75    0.79
  -6 -10   3   -0.86    0.50
   5  10  -3    2.45    0.83
   5  10  -3    3.87    0.71
  -5 -10   3    4.19    0.77
  -5 -10   3    2.13    0.70
  -5 -10   3    3.53    0.84
  -5 -10   3    4.65    0.93
  -5 -10   3    3.92    0.77
   4  10  -3   25.73    1.68
   4  10  -3   24.89    1.31
  -4 -10   3   28.40    1.49
  -4 -10   3   25.51    1.50
  -4 -10   3   24.89    1.49
  -4 -10   3   24.20    1.66
  -4 -10   3   25.10    1.62
   3  10  -3   14.22    0.96
   3  10  -3   16.66    1.51
  -3 -10   3   14.05    1.30
  -3 -10   3   15.64    1.38
  -3 -10   3   13.22    1.14
  -3 -10   3   16.16    1.19
  -3 -10   3   15.75    1.52
  -2 -10   3   33.15    1.84
  -2 -10   3   32.09    1.59
  -2 -10   3   36.84    1.84
  -2 -10   3   32.36    1.96
  -2 -10   3   31.39    1.57
  -1 -10   3   29.84    1.86
  -1 -10   3   27.92    1.75
  -1 -10   3   30.11    1.68
  -1 -10   3   28.09    1.44
   0 -10   3    1.63    0.79
   0 -10   3    1.86    0.56
   0 -10   3    3.60    0.96
   0 -10   3    1.68    0.72
   1 -10   3    5.38    0.69
   1 -10   3    3.22    0.94
   1 -10   3    5.02    1.08
   1 -10   3    4.22    0.92
   2 -10   3    1.04    0.48
   2 -10   3    1.50    0.85
   2 -10   3    1.73    0.80
   2 -10   3    0.03    0.83
   3 -10   3    3.43    1.13
   3 -10   3    4.45    1.07
   3 -10   3    5.07    0.64
   4 -10   3   13.27    1.72
   4 -10   3   13.73    0.81
   4 -10   3   11.54    1.59
   4 -10   3   14.43    1.67
  13   9  -3   -0.08    0.84
  13   9  -3    1.92    1.11
  13   9  -3    0.29    0.71
 -13  -9   3    1.17    0.94
 -13  -9   3    1.19    0.99
  12   9  -3   11.37    1.55
  12   9  -3    9.77    1.31
 -12  -9   3   12.11    1.63
 -12  -9   3    9.63    1.18
 -12  -9   3   10.88    1.37
  11   9  -3    0.80    0.84
  11   9  -3    1.91    0.78
 -11  -9   3    1.48    0.75
 -11  -9   3    1.95    0.96
 -11  -9   3    2.13    0.72
  10   9  -3    1.78    0.85
  10   9  -3    0.58    0.61
 -10  -9   3    1.07    0.63
 -10  -9   3    1.58    0.81
 -10  -9   3    0.81    0.69
   9   9  -3    9.86    1.28
   9   9  -3    8.02    1.06
   9   9  -3    9.15    0.99
  -9  -9   3    6.34    1.08
  -9  -9   3    6.14    0.95
  -9  -9   3    8.43    1.04
  -9  -9   3    9.89    1.15
   8   9  -3    2.64    0.68
   8   9  -3    4.33    0.96
   8   9  -3    6.81    0.94
  -8  -9   3    3.83    0.81
  -8  -9   3    3.59    0.76
  -8  -9   3    4.44    0.86
  -8  -9   3    4.92    0.83
  -8  -9   3    3.06    0.90
   7   9  -3   26.37    1.50
   7   9  -3   26.89    1.44
   7   9  -3   22.95    1.51
  -7  -9   3   25.76    1.42
  -7  -9   3   26.90    1.58
  -7  -9   3   23.07    1.31
  -7  -9   3   24.92    1.49
  -7  -9   3   25.25    1.56
   6   9  -3   71.56    2.46
   6   9  -3   65.01    2.61
  -6  -9   3   67.56    2.61
  -6  -9   3   66.97    2.44
  -6  -9   3   64.33    2.24
  -6  -9   3   65.00    2.57
  -6  -9   3   68.07    2.32
  -6  -9   3   70.33    2.50
  -6  -9   3   66.43    2.26
   5   9  -3    3.62    0.64
   5   9  -3    3.94    0.80
  -5  -9   3    2.20    0.55
  -5  -9   3    2.84    0.74
  -5  -9   3    2.99    0.69
  -5  -9   3    3.15    0.66
  -5  -9   3    3.99    0.82
  -5  -9   3    1.40    0.55
   4   9  -3   27.43    1.63
   4   9  -3   27.73    1.34
  -4  -9   3   29.34    1.51
  -4  -9   3   28.52    1.60
  -4  -9   3   29.53    1.65
  -4  -9   3   27.96    1.26
  -4  -9   3   30.45    1.50
  -4  -9   3   29.39    1.47
   3   9  -3    6.00    0.66
   3   9  -3    5.57    0.92
  -3  -9   3    4.30    0.78
  -3  -9   3    5.22    0.90
  -3  -9   3    6.37    0.90
  -3  -9   3    3.97    0.69
  -3  -9   3    3.64    0.67
   2   9  -3    0.75    0.65
   2   9  -3    1.38    0.39
  -2  -9   3    1.75    0.66
  -2  -9   3    1.06    0.61
  -2  -9   3    0.61    0.50
  -2  -9   3    0.91    0.66
  -2  -9   3    0.62    0.46
  -1  -9   3    4.92    0.91
  -1  -9   3    5.35    0.94
  -1  -9   3    3.84    0.66
  -1  -9   3    5.54    0.71
  -1  -9   3    3.94    0.80
   0  -9   3    4.96    0.84
   0  -9   3    4.40    0.65
   0  -9   3    2.45    0.80
   0  -9   3    2.82    0.82
   1  -9   3   13.96    0.94
   1  -9   3   12.67    1.40
   1  -9   3   14.87    1.31
   1  -9   3   12.27    1.28
   2  -9   3   54.86    2.43
   2  -9   3   50.38    2.18
   2  -9   3   47.43    1.71
   2  -9   3   46.61    2.39
   3  -9   3    6.31    1.10
   3  -9   3    7.92    1.23
   3  -9   3    4.53    1.00
   3  -9   3    5.43    0.59
   4  -9   3    7.50    0.59
   4  -9   3    6.20    1.19
   4  -9   3    6.41    1.24
   4  -9   3    6.10    1.20
   5  -9   3    2.28    1.02
   5  -9   3    2.55    1.05
   5  -9   3    4.39    1.14
  13   8  -3    0.18    0.70
  13   8  -3   -0.98    0.79
  13   8  -3   -0.48    0.71
  13   8  -3    0.43    0.74
 -13  -8   3   -0.61    0.79
 -13  -8   3    0.69    0.93
  12   8  -3    7.10    1.11
  12   8  -3    9.65    1.40
  12   8  -3    9.19    1.30
  12   8  -3    6.20    1.08
 -12  -8   3    5.02    1.19
 -12  -8   3    7.76    1.22
  11   8  -3   29.94    1.86
  11   8  -3   33.83    1.88
  11   8  -3   31.70    1.88
  11   8  -3   31.43    2.02
 -11  -8   3   32.85    2.07
 -11  -8   3   33.69    1.71
 -11  -8   3   33.83    1.97
  10   8  -3    0.81    0.60
  10   8  -3   -0.30    0.51
  10   8  -3   -0.03    0.70
  10   8  -3    0.52    0.59
 -10  -8   3    1.40    0.82
 -10  -8   3   -0.46    0.63
 -10  -8   3    0.29    0.54
   9   8  -3   31.68    1.86
   9   8  -3   31.32    1.73
   9   8  -3   38.04    1.81
   9   8  -3   31.55    1.51
   9   8  -3   32.60    1.59
  -9  -8   3   37.43    1.72
  -9  -8   3   29.04    1.66
  -9  -8   3   33.52    1.88
  -9  -8   3   33.18    1.66
   8   8  -3   13.02    1.19
   8   8  -3   13.40    1.22
   8   8  -3   13.66    0.99
   8   8  -3   13.16    1.31
   8   8  -3   14.73    1.04
  -8  -8   3   15.03    1.23
  -8  -8   3   14.18    1.36
  -8  -8   3   14.55    1.17
  -8  -8   3   12.21    1.11
   7   8  -3    2.98    0.65
   7   8  -3    3.03    0.52
   7   8  -3    1.38    0.55
   7   8  -3    2.79    0.69
   7   8  -3    1.68    0.57
  -7  -8   3    3.51    0.72
  -7  -8   3    2.62    0.69
  -7  -8   3    2.65    0.59
  -7  -8   3    1.36    0.57
  -7  -8   3    3.88    0.79
   6   8  -3    0.95    0.60
   6   8  -3    1.00    0.49
   6   8  -3    1.24    0.51
   6   8  -3    0.27    0.29
  -6  -8   3    0.65    0.41
  -6  -8   3    0.81    0.50
  -6  -8   3    1.00    0.54
  -6  -8   3    0.72    0.59
  -6  -8   3    0.34    0.42
  -6  -8   3    0.46    0.47
  -6  -8   3    0.21    0.55
   5   8  -3    2.04    0.65
   5   8  -3    0.66    0.46
  -5  -8   3    0.46    0.40
  -5  -8   3    0.51    0.47
  -5  -8   3    0.04    0.55
  -5  -8   3    1.31    0.49
  -5  -8   3    1.03    0.47
  -5  -8   3    0.56    0.57
   4   8  -3   18.27    1.08
   4   8  -3   19.98    1.24
  -4  -8   3   20.02    1.27
  -4  -8   3   21.00    1.18
  -4  -8   3   17.07    1.11
  -4  -8   3   19.41    1.12
  -4  -8   3   18.53    1.17
  -4  -8   3   19.27    0.99
   3   8  -3   77.76    2.40
   3   8  -3   78.64    2.73
  -3  -8   3   77.86    2.75
  -3  -8   3   82.94    2.71
  -3  -8   3   78.88    2.53
  -3  -8   3   78.91    2.31
  -3  -8   3   81.76    2.62
  -3  -8   3   79.44    2.53
   2   8  -3   18.79    1.31
   2   8  -3   18.44    0.90
  -2  -8   3   18.31    1.27
  -2  -8   3   16.96    1.15
  -2  -8   3   17.08    0.88
  -2  -8   3   17.14    1.08
  -2  -8   3   15.85    1.03
  -2  -8   3   15.17    1.12
   1   8  -3   32.25    1.10
  -1  -8   3   32.65    1.57
  -1  -8   3   34.78    1.42
  -1  -8   3   33.41    1.68
  -1  -8   3   33.53    1.63
  -1  -8   3   33.93    1.39
   0  -8   3   25.81    1.56
   0  -8   3   28.73    1.22
   0  -8   3   26.30    1.51
   0  -8   3   27.95    1.47
   0  -8   3   26.32    1.20
   1  -8   3    1.50    0.71
   1  -8   3    3.19    0.72
   1  -8   3    2.21    0.70
   1  -8   3    1.76    0.44
   2  -8   3    0.57    0.63
   2  -8   3    0.57    0.59
   2  -8   3    0.40    0.35
   2  -8   3   -0.06    0.63
   3  -8   3    2.37    0.43
   3  -8   3    2.60    0.80
   3  -8   3    3.32    0.87
   3  -8   3    3.12    0.76
   4  -8   3    0.29    0.75
   4  -8   3    1.55    0.84
   4  -8   3    0.39    0.30
   4  -8   3    0.91    0.75
   5  -8   3   14.39    1.58
   5  -8   3   15.87    1.61
   5  -8   3   18.41    1.74
   6  -8   3    3.42    1.06
   6  -8   3    4.18    0.99
   6  -8   3    6.19    1.15
  13   7  -3   13.43    1.65
  13   7  -3   11.41    1.39
  13   7  -3   11.69    1.52
  13   7  -3   10.76    1.32
 -13  -7   3   12.67    1.65
 -13  -7   3   12.60    1.65
  12   7  -3   -0.71    0.55
  12   7  -3   -0.50    0.73
  12   7  -3   -0.65    0.77
  12   7  -3    0.66    0.70
 -12  -7   3   -0.93    0.75
 -12  -7   3   -0.62    0.67
  11   7  -3    4.44    1.07
  11   7  -3    3.69    0.87
  11   7  -3    4.79    0.90
  11   7  -3    4.80    0.98
 -11  -7   3    3.59    0.70
 -11  -7   3    4.56    1.05
 -11  -7   3    2.17    0.85
  10   7  -3    0.25    0.57
  10   7  -3    0.77    0.62
  10   7  -3   -0.28    0.65
  10   7  -3    0.86    0.58
 -10  -7   3    0.07    0.64
 -10  -7   3   -0.06    0.47
 -10  -7   3    0.71    0.67
   9   7  -3    2.81    0.69
   9   7  -3    3.06    0.70
   9   7  -3    4.10    0.89
   9   7  -3    3.41    0.72
  -9  -7   3    2.63    0.63
  -9  -7   3    3.53    0.80
  -9  -7   3    3.19    0.85
  -9  -7   3    3.12    0.64
   8   7  -3   14.97    1.02
   8   7  -3   15.59    1.22
   8   7  -3   14.30    1.06
   8   7  -3   16.01    1.15
   8   7  -3   15.12    1.28
  -8  -7   3   14.38    1.19
  -8  -7   3   14.22    1.09
  -8  -7   3   16.99    1.12
  -8  -7   3   17.69    1.32
   7   7  -3   21.82    1.27
   7   7  -3   20.93    1.21
   7   7  -3   18.80    1.04
   7   7  -3   21.23    1.11
   7   7  -3   17.46    1.27
  -7  -7   3   16.90    1.28
  -7  -7   3   18.58    1.19
  -7  -7   3   20.87    1.21
  -7  -7   3   18.47    1.19
  -7  -7   3   18.15    1.11
   6   7  -3   42.52    1.56
   6   7  -3   50.93    2.00
   6   7  -3   47.30    1.84
   6   7  -3   49.67    1.87
   6   7  -3   46.46    1.75
  -6  -7   3   49.10    1.84
  -6  -7   3   48.42    1.98
  -6  -7   3   51.12    1.78
  -6  -7   3   45.61    1.83
  -6  -7   3   48.82    1.56
  -6  -7   3   45.69    1.86
  -6  -7   3   47.51    1.84
   5   7  -3   53.54    2.04
   5   7  -3   53.54    1.94
   5   7  -3   55.86    1.94
   5   7  -3   54.83    1.62
   5   7  -3   58.00    1.99
  -5  -7   3   57.43    2.01
  -5  -7   3   54.74    1.97
  -5  -7   3   56.29    2.05
  -5  -7   3   55.81    2.09
  -5  -7   3   55.15    1.89
  -5  -7   3   56.08    1.81
   4   7  -3    0.21    0.44
   4   7  -3    0.21    0.35
   4   7  -3    0.06    0.35
   4   7  -3    0.43    0.19
  -4  -7   3    0.62    0.43
  -4  -7   3    0.33    0.38
  -4  -7   3   -0.04    0.42
  -4  -7   3    0.56    0.45
  -4  -7   3    0.23    0.35
  -4  -7   3    0.18    0.34
   3   7  -3    4.40    0.56
   3   7  -3    5.20    0.76
   3   7  -3    4.52    0.55
  -3  -7   3    3.41    0.56
  -3  -7   3    4.37    0.66
  -3  -7   3    4.25    0.51
  -3  -7   3    5.48    0.64
  -3  -7   3    6.13    0.79
  -3  -7   3    5.44    0.67
   2   7  -3   -0.07    0.30
   2   7  -3    1.19    0.54
  -2  -7   3    0.86    0.47
  -2  -7   3    0.16    0.46
  -2  -7   3   -0.62    0.37
  -2  -7   3    0.19    0.36
  -2  -7   3   -0.06    0.33
  -2  -7   3    0.15    0.29
   1   7  -3    0.98    0.30
   1   7  -3    1.63    0.59
  -1  -7   3    0.42    0.35
  -1  -7   3    1.18    0.39
  -1  -7   3    0.90    0.48
  -1  -7   3    0.52    0.33
  -1  -7   3    0.75    0.51
  -1  -7   3    1.33    0.50
   0  -7   3   29.52    1.42
   0  -7   3   30.49    1.14
   0  -7   3   31.34    1.20
   0  -7   3   32.70    1.25
   0  -7   3   28.33    1.51
   0  -7   3   29.77    1.47
   1  -7   3   21.84    1.13
   1  -7   3   23.35    1.41
   1  -7   3   24.32    1.08
   1  -7   3   21.97    1.01
   1  -7   3   26.26    1.44
   1  -7   3   22.26    1.23
   2  -7   3    3.62    0.68
   2  -7   3    2.89    0.44
   2  -7   3    3.15    0.74
   2  -7   3    4.84    0.83
  -3   7  -3   33.42    1.65
   3  -7   3   31.09    1.71
   3  -7   3   31.84    1.72
   3  -7   3   32.44    1.59
   3  -7   3   30.69    1.11
  -4   7  -3    5.41    0.89
   4  -7   3    4.15    0.90
   4  -7   3    3.92    0.89
   4  -7   3    4.04    0.40
   4  -7   3    5.73    0.85
   4  -7   3    4.54    0.91
   4  -7   3    4.52    0.42
  -5   7  -3    3.10    0.82
   5  -7   3    2.79    0.87
   5  -7   3    2.84    0.88
   5  -7   3    3.67    0.88
  -6   7  -3   -0.10    0.70
   6  -7   3    0.06    0.64
   6  -7   3   -0.19    0.68
   6  -7   3   -0.45    0.64
   6  -7   3    0.45    0.71
   7  -7   3   -0.46    0.71
   7  -7   3   -0.83    0.67
  13   6  -3    2.52    0.82
  13   6  -3    3.34    1.08
  13   6  -3    2.46    0.96
 -13  -6   3    3.36    1.10
  12   6  -3    3.87    1.06
  12   6  -3    3.76    1.04
  12   6  -3    6.12    1.03
  12   6  -3    5.51    0.97
 -12  -6   3    3.37    1.02
 -12  -6   3    6.25    1.21
  11   6  -3    8.30    1.18
  11   6  -3    9.27    1.27
  11   6  -3    9.65    1.12
  11   6  -3    8.80    1.06
 -11  -6   3   10.26    1.31
 -11  -6   3    8.07    1.17
  10   6  -3   28.32    1.59
  10   6  -3   29.10    1.60
  10   6  -3   28.51    1.69
  10   6  -3   26.90    1.73
 -10  -6   3   29.35    1.43
 -10  -6   3   27.45    1.74
 -10  -6   3   28.18    1.69
   9   6  -3    1.76    0.71
   9   6  -3    0.13    0.51
   9   6  -3    1.20    0.62
   9   6  -3    1.25    0.57
  -9  -6   3    0.69    0.59
  -9  -6   3    1.15    0.49
  -9  -6   3    1.09    0.50
  -9  -6   3    0.36    0.63
   8   6  -3    7.64    0.88
   8   6  -3    8.24    0.96
   8   6  -3    8.73    0.93
   8   6  -3   10.79    0.86
   8   6  -3    8.39    0.92
  -8  -6   3    7.83    0.93
  -8  -6   3    9.13    0.87
  -8  -6   3    9.62    1.12
  -8  -6   3    8.68    0.83
   7   6  -3    3.73    0.76
   7   6  -3    3.06    0.60
   7   6  -3    3.11    0.58
   7   6  -3    3.68    0.53
   7   6  -3    2.81    0.61
  -7  -6   3    4.10    0.74
  -7  -6   3    3.53    0.62
  -7  -6   3    3.82    0.61
  -7  -6   3    3.60    0.62
   6   6  -3    1.33    0.47
   6   6  -3    0.86    0.49
   6   6  -3    0.93    0.38
   6   6  -3    1.17    0.39
   6   6  -3    0.90    0.43
  -6  -6   3    1.56    0.48
  -6  -6   3    1.38    0.43
  -6  -6   3    1.49    0.47
  -6  -6   3    1.06    0.29
  -6  -6   3    1.74    0.51
  -6  -6   3    1.58    0.46
  -6  -6   3    1.29    0.48
   5   6  -3   38.67    1.49
   5   6  -3   35.99    1.53
   5   6  -3   36.34    1.38
   5   6  -3   35.91    1.44
   5   6  -3   33.98    1.22
  -5  -6   3   35.04    1.35
  -5  -6   3   36.71    1.52
  -5  -6   3   34.98    1.22
  -5  -6   3   35.27    1.45
  -5  -6   3   33.80    1.43
  -5  -6   3   36.28    1.42
  -5  -6   3   34.37    1.43
   4   6  -3   30.71    1.26
   4   6  -3   27.18    1.29
   4   6  -3   29.78    0.97
   4   6  -3   28.14    1.20
   4   6  -3   31.42    1.27
  -4  -6   3   31.34    1.20
  -4  -6   3   28.40    1.15
  -4  -6   3   29.42    1.25
  -4  -6   3   30.56    1.35
  -4  -6   3   31.77    1.31
  -4  -6   3   29.58    1.34
   3   6  -3    1.22    0.18
   3   6  -3    0.98    0.46
   3   6  -3    0.97    0.36
   3   6  -3    1.32    0.39
  -3  -6   3    1.00    0.40
  -3  -6   3    0.89    0.32
  -3  -6   3    1.41    0.39
  -3  -6   3    1.59    0.48
  -3  -6   3    1.68    0.42
  -3  -6   3    1.30    0.47
   2   6  -3  107.97    2.82
   2   6  -3  109.87    3.12
  -2  -6   3  103.44    2.72
  -2  -6   3  104.88    3.01
  -2  -6   3  103.24    2.98
  -2  -6   3  103.97    2.91
  -2  -6   3   97.18    3.03
  -2  -6   3  105.52    2.88
   1   6  -3   11.55    0.64
   1   6  -3   11.80    0.90
  -1  -6   3   13.03    0.77
  -1  -6   3   13.64    0.96
  -1  -6   3   13.58    0.66
  -1  -6   3   12.70    0.88
  -1  -6   3   12.81    0.86
  -1  -6   3   11.32    0.74
  -1  -6   3   12.94    0.74
   0   6  -3   13.68    0.48
   0  -6   3   12.67    0.70
   0  -6   3   13.57    0.73
   0  -6   3   12.23    0.49
   0  -6   3   14.10    0.95
   0  -6   3   12.41    0.67
   0  -6   3   12.03    0.94
   0  -6   3   12.88    0.86
   0  -6   3   13.37    0.74
   1  -6   3   11.61    1.00
   1  -6   3   11.33    0.60
   1  -6   3   12.12    0.66
   1  -6   3   10.83    0.65
   1  -6   3   12.07    0.72
   1  -6   3   11.27    0.66
   1  -6   3   11.59    0.83
   1  -6   3   11.66    1.04
  -2   6  -3    0.53    0.44
   2  -6   3    0.50    0.26
   2  -6   3    0.66    0.50
   2  -6   3    0.56    0.48
   2  -6   3    0.70    0.40
   2  -6   3    0.40    0.26
   2  -6   3    0.23    0.42
   2  -6   3   -0.01    0.31
  -3   6  -3    5.84    0.76
   3  -6   3    5.08    0.71
   3  -6   3    4.05    0.79
   3  -6   3    4.22    0.78
   3  -6   3    4.32    0.41
   3  -6   3    5.13    0.41
   3  -6   3    5.16    0.64
   3  -6   3    6.09    0.76
  -4   6  -3   29.35    1.54
   4  -6   3   31.73    1.67
   4  -6   3   27.25    1.42
   4  -6   3   30.24    1.63
   4  -6   3   28.81    1.45
   4  -6   3   29.44    1.40
   4  -6   3   30.54    1.64
   4  -6   3   28.26    0.92
   4  -6   3   27.41    0.91
  -5   6  -3    1.99    0.70
   5  -6   3    2.28    0.60
   5  -6   3    0.24    0.59
   5  -6   3    0.28    0.60
   5  -6   3    0.80    0.61
   5  -6   3    1.04    0.56
  -6   6  -3   23.41    1.66
   6  -6   3   24.69    1.59
   6  -6   3   22.81    1.54
   6  -6   3   24.86    1.67
   6  -6   3   24.27    1.67
  -7   6  -3   11.22    1.36
   7  -6   3   13.67    1.36
   7  -6   3   11.29    1.34
   7  -6   3   14.65    1.52
  -8   6  -3    0.14    0.77
   8  -6   3   -0.82    0.72
  13   5  -3    8.60    1.34
  13   5  -3    6.53    1.04
  13   5  -3    7.21    1.37
 -13  -5   3   10.01    1.55
  12   5  -3    8.30    1.29
  12   5  -3    8.06    1.08
  12   5  -3    7.94    1.22
 -12  -5   3    8.05    1.33
  11   5  -3   -0.06    0.53
  11   5  -3    0.35    0.55
  11   5  -3   -0.27    0.63
  11   5  -3    0.46    0.67
 -11  -5   3    0.62    0.73
 -11  -5   3    0.67    0.78
  10   5  -3    3.92    0.76
  10   5  -3    5.15    0.82
  10   5  -3    5.13    0.97
  10   5  -3    4.63    0.88
 -10  -5   3    2.12    0.85
 -10  -5   3    5.01    0.96
   9   5  -3    6.25    0.93
   9   5  -3    6.74    0.82
   9   5  -3    6.24    0.90
   9   5  -3    5.05    0.77
  -9  -5   3    6.31    0.71
  -9  -5   3    6.16    0.95
  -9  -5   3    5.73    0.94
   8   5  -3    3.83    0.69
   8   5  -3    3.83    0.66
   8   5  -3    4.23    0.68
   8   5  -3    4.01    0.76
   8   5  -3    3.58    0.52
  -8  -5   3    2.59    0.52
  -8  -5   3    3.13    0.64
  -8  -5   3    3.57    0.59
  -8  -5   3    3.12    0.75
   7   5  -3   88.65    2.52
   7   5  -3   83.09    2.70
   7   5  -3   86.15    2.83
   7   5  -3   85.67    2.71
   7   5  -3   89.04    2.74
  -7  -5   3   88.19    2.62
  -7  -5   3   88.08    2.88
  -7  -5   3   91.10    2.66
  -7  -5   3   89.76    2.79
   6   5  -3   12.50    0.82
   6   5  -3   13.56    0.78
   6   5  -3   13.72    0.92
   6   5  -3   12.11    0.86
   6   5  -3   11.87    0.89
  -6  -5   3   14.38    0.89
  -6  -5   3   13.50    0.88
  -6  -5   3   12.67    0.90
  -6  -5   3   11.98    0.83
  -6  -5   3   13.36    0.98
  -6  -5   3   12.21    0.49
   5   5  -3   33.76    1.23
   5   5  -3   35.13    1.25
   5   5  -3   32.32    1.34
   5   5  -3   34.20    1.42
   5   5  -3   33.00    1.33
  -5  -5   3   32.83    1.33
  -5  -5   3   31.80    1.31
  -5  -5   3   33.81    1.35
  -5  -5   3   34.31    1.07
  -5  -5   3   32.26    1.27
  -5  -5   3   34.74    1.36
  -5  -5   3   35.28    1.44
   4   5  -3   65.26    2.00
   4   5  -3   62.35    1.78
   4   5  -3   65.50    2.01
   4   5  -3   61.28    1.91
   4   5  -3   60.59    2.05
  -4  -5   3   65.92    2.09
  -4  -5   3   64.50    2.03
  -4  -5   3   62.32    1.98
  -4  -5   3   62.45    1.98
  -4  -5   3   64.70    1.89
  -4  -5   3   65.08    1.82
  -4  -5   3   65.02    1.95
   3   5  -3   25.29    1.06
   3   5  -3   24.27    1.06
   3   5  -3   24.41    1.12
   3   5  -3   25.03    1.06
   3   5  -3   27.23    0.81
  -3  -5   3   25.57    1.14
  -3  -5   3   26.70    1.00
  -3  -5   3   25.23    1.01
  -3  -5   3   23.52    1.08
  -3  -5   3   24.79    1.05
  -3  -5   3   25.53    1.11
   2   5  -3   -0.03    0.25
   2   5  -3    0.17    0.32
   2   5  -3    0.36    0.29
  -2  -5   3    0.49    0.39
  -2  -5   3    0.37    0.25
  -2  -5   3   -0.01    0.28
  -2  -5   3    0.94    0.33
  -2  -5   3    0.74    0.34
  -2  -5   3    0.48    0.39
   1   5  -3   44.65    1.64
   1   5  -3   42.71    1.32
  -1  -5   3   43.52    1.60
  -1  -5   3   44.39    1.29
  -1  -5   3   43.36    1.39
  -1  -5   3   41.34    1.52
  -1  -5   3   44.10    1.40
  -1  -5   3   43.17    1.41
  -1  -5   3   44.85    1.52
   0   5  -3    1.21    0.21
   0  -5   3    1.42    0.31
   0  -5   3    1.15    0.29
   0  -5   3    1.84    0.32
   0  -5   3    1.33    0.40
   0  -5   3    1.77    0.32
   0  -5   3    1.65    0.47
   0  -5   3    1.69    0.44
  -1   5  -3   90.70    2.52
   1  -5   3   87.82    2.68
   1  -5   3   86.12    2.28
   1  -5   3   87.37    2.27
   1  -5   3   85.56    2.42
   1  -5   3   85.78    2.28
   1  -5   3   83.83    2.63
   1  -5   3   89.50    2.55
  -2   5  -3   94.04    2.74
   2  -5   3   89.50    2.83
   2  -5   3   94.10    2.66
   2  -5   3   92.35    2.70
   2  -5   3   91.52    2.37
   2  -5   3   94.40    2.35
   2  -5   3   94.22    2.37
   2  -5   3   92.86    2.86
  -3   5  -3    1.10    0.46
   3  -5   3    2.78    0.51
   3  -5   3    1.25    0.23
   3  -5   3    1.05    0.50
   3  -5   3    1.56    0.46
   3  -5   3    1.25    0.52
  -4   5  -3   15.38    1.08
   4  -5   3   15.15    0.55
   4  -5   3   14.02    1.10
   4  -5   3   13.98    1.20
   4  -5   3   15.97    1.03
   4  -5   3   15.08    0.57
   4  -5   3   15.34    1.07
   4  -5   3   14.29    0.97
  -5   5  -3    7.30    0.97
   5  -5   3    9.04    1.06
   5  -5   3    8.75    0.91
   5  -5   3    8.81    0.93
   5  -5   3    8.10    0.94
   5  -5   3    6.84    0.93
   5  -5   3   10.87    1.07
  -6   5  -3    0.73    0.62
   6  -5   3    0.54    0.53
   6  -5   3    0.35    0.58
   6  -5   3   -0.61    0.48
   6  -5   3    1.27    0.58
   6  -5   3   -0.01    0.48
   6  -5   3    0.84    0.54
   6  -5   3   -0.50    0.52
  -7   5  -3    1.39    0.75
   7  -5   3    4.01    0.79
   7  -5   3    5.66    0.98
   7  -5   3    4.38    0.96
   7  -5   3    4.97    0.93
  -8   5  -3   -0.18    0.73
   8  -5   3    0.50    0.75
   8  -5   3    0.00    0.67
   8  -5   3    1.21    0.83
  -9   5  -3    8.55    1.37
   9  -5   3   10.29    1.40
   9  -5   3    8.85    1.37
  13   4  -3    0.61    0.61
  13   4  -3    1.41    0.91
  13   4  -3    2.74    1.07
 -13  -4   3    0.56    0.93
  12   4  -3   19.09    1.74
  12   4  -3   19.41    1.51
  12   4  -3   16.15    1.77
 -12  -4   3   15.76    1.66
  11   4  -3   10.25    1.36
  11   4  -3    9.09    1.22
  11   4  -3    9.78    1.06
 -11  -4   3   10.90    1.26
  10   4  -3    5.72    0.84
  10   4  -3    6.64    1.03
  10   4  -3    6.88    0.84
  10   4  -3    6.09    0.99
 -10  -4   3    4.95    0.99
   9   4  -3   52.42    2.01
   9   4  -3   55.26    2.07
   9   4  -3   54.98    2.27
   9   4  -3   53.60    2.24
  -9  -4   3   52.09    1.75
  -9  -4   3   56.33    2.28
  -9  -4   3   52.71    2.27
   8   4  -3    6.00    0.72
   8   4  -3    4.43    0.77
   8   4  -3    7.01    0.77
   8   4  -3    6.60    0.64
   8   4  -3    6.16    0.82
  -8  -4   3    5.18    0.80
  -8  -4   3    6.18    0.63
  -8  -4   3    5.38    0.80
  -8  -4   3    6.99    0.71
   7   4  -3    6.45    0.76
   7   4  -3    5.42    0.74
   7   4  -3    6.48    0.58
   7   4  -3    6.00    0.67
   7   4  -3    4.40    0.62
  -7  -4   3    5.78    0.63
  -7  -4   3    5.59    0.75
  -7  -4   3    5.96    0.61
  -7  -4   3    5.67    0.76
   6   4  -3    0.72    0.41
   6   4  -3    0.63    0.45
   6   4  -3    0.22    0.33
   6   4  -3    0.57    0.28
   6   4  -3    0.28    0.34
  -6  -4   3    0.41    0.34
  -6  -4   3    0.31    0.38
  -6  -4   3    0.63    0.36
  -6  -4   3    0.66    0.41
  -6  -4   3    0.54    0.33
   5   4  -3   11.22    0.83
   5   4  -3   13.00    0.68
   5   4  -3   10.57    0.77
   5   4  -3   11.36    0.75
   5   4  -3   11.58    0.77
  -5  -4   3    9.98    0.74
  -5  -4   3   11.84    0.75
  -5  -4   3   11.85    0.79
  -5  -4   3   12.20    0.86
  -5  -4   3   11.40    0.44
  -5  -4   3    9.86    0.73
   4   4  -3   27.14    1.12
   4   4  -3   27.21    1.15
   4   4  -3   28.91    1.04
   4   4  -3   28.28    1.04
   4   4  -3   28.60    1.13
  -4  -4   3   27.97    0.90
  -4  -4   3   30.95    1.16
  -4  -4   3   28.07    1.08
  -4  -4   3   29.87    1.14
  -4  -4   3   29.20    1.10
  -4  -4   3   26.30    1.18
  -4  -4   3   26.96    1.11
   3   4  -3  151.10    3.99
   3   4  -3  155.80    3.75
   3   4  -3  154.49    3.93
   3   4  -3  157.88    3.93
   3   4  -3  154.64    3.88
  -3  -4   3  158.92    3.99
  -3  -4   3  156.07    3.86
  -3  -4   3  160.07    3.95
  -3  -4   3  155.91    4.00
  -3  -4   3  152.30    3.92
  -3  -4   3  153.76    3.80
   2   4  -3   11.99    0.65
   2   4  -3   11.83    0.43
   2   4  -3   12.08    0.66
   2   4  -3   12.30    0.75
  -2  -4   3   11.83    0.74
  -2  -4   3   10.48    0.70
  -2  -4   3   12.63    0.66
  -2  -4   3   12.00    0.58
  -2  -4   3   11.18    0.65
  -2  -4   3   11.25    0.67
   1   4  -3   60.54    1.64
  -1  -4   3   58.33    1.83
  -1  -4   3   60.91    1.68
  -1  -4   3   59.80    1.68
  -1  -4   3   59.01    1.76
  -1  -4   3   58.21    1.67
  -1  -4   3   57.76    1.56
  -1  -4   3   59.56    1.79
   0   4  -3   25.44    0.76
   0  -4   3   25.09    0.98
   0  -4   3   23.82    0.81
   0  -4   3   22.69    1.05
   0  -4   3   24.70    0.86
   0  -4   3   22.10    1.01
   0  -4   3   23.28    0.85
   0  -4   3   23.92    0.84
  -1   4  -3    0.62    0.32
   1  -4   3    0.44    0.37
   1  -4   3   -0.02    0.31
   1  -4   3    0.69    0.33
   1  -4   3    0.54    0.21
   1  -4   3    0.57    0.29
   1  -4   3    0.38    0.21
   1  -4   3    0.48    0.22
  -2   4  -3    0.47    0.34
   2  -4   3    0.40    0.19
   2  -4   3    0.36    0.18
   2  -4   3   -0.11    0.34
   2  -4   3    0.52    0.19
   2  -4   3    0.13    0.35
   2  -4   3    0.59    0.32
   2  -4   3    0.61    0.31
  -3   4  -3    0.41    0.35
   3  -4   3    0.10    0.35
   3  -4   3    0.38    0.39
   3  -4   3    0.17    0.15
   3  -4   3   -0.01    0.15
   3  -4   3   -0.12    0.29
   3  -4   3    0.61    0.33
  -4   4  -3   16.82    1.03
   4  -4   3   15.13    0.97
   4  -4   3   13.57    0.90
   4  -4   3   14.64    1.01
   4  -4   3   14.21    0.50
   4  -4   3   14.28    0.97
   4  -4   3   17.31    0.94
  -5   4  -3   43.23    1.84
   5  -4   3   43.63    1.71
   5  -4   3   42.73    1.74
   5  -4   3   44.63    1.75
   5  -4   3   41.32    1.82
   5  -4   3   45.10    1.90
  -6   4  -3    0.66    0.57
   6  -4   3    1.22    0.61
   6  -4   3    0.80    0.50
   6  -4   3    1.33    0.53
   6  -4   3    1.35    0.52
   6  -4   3    1.00    0.48
  -7   4  -3   32.62    1.84
   7  -4   3   36.22    1.86
   7  -4   3   36.22    1.70
   7  -4   3   35.63    1.88
   7  -4   3   35.67    1.87
  -8   4  -3   11.12    1.36
   8  -4   3   13.70    1.43
   8  -4   3   15.41    1.45
   8  -4   3   10.90    1.27
   8  -4   3   14.57    1.45
  -9   4  -3    0.83    0.76
   9  -4   3    1.30    0.85
   9  -4   3    0.21    0.79
 -10   4  -3    1.94    0.94
  10  -4   3    0.71    0.88
  10  -4   3   -1.04    0.86
  13   3  -3    1.75    0.70
  13   3  -3    2.36    0.96
  13   3  -3    1.70    1.09
 -13  -3   3    1.25    0.99
  12   3  -3    5.23    0.84
  12   3  -3    3.01    1.06
  12   3  -3    5.41    1.16
 -12  -3   3    4.35    1.16
  11   3  -3    5.01    0.79
  11   3  -3    6.45    1.13
  11   3  -3    6.32    1.07
 -11  -3   3    8.21    1.21
  10   3  -3    0.49    0.68
  10   3  -3   -0.42    0.59
  10   3  -3    0.13    0.45
 -10  -3   3    1.05    0.75
   9   3  -3    9.60    0.92
   9   3  -3   10.99    1.14
   9   3  -3   12.04    1.23
   9   3  -3   11.85    0.97
  -9  -3   3   11.08    1.21
   8   3  -3   25.35    1.43
   8   3  -3   28.11    1.51
   8   3  -3   28.96    1.16
   8   3  -3   26.69    1.26
   8   3  -3   28.10    1.29
  -8  -3   3   26.71    1.46
  -8  -3   3   25.20    1.46
  -8  -3   3   26.83    1.02
  -8  -3   3   26.77    1.17
   7   3  -3    3.29    0.45
   7   3  -3    4.84    0.70
   7   3  -3    2.65    0.48
   7   3  -3    3.31    0.51
  -7  -3   3    2.63    0.46
  -7  -3   3    3.55    0.64
  -7  -3   3    3.29    0.43
  -7  -3   3    3.21    0.60
   6   3  -3   72.00    2.17
   6   3  -3   72.05    2.33
   6   3  -3   72.68    2.04
   6   3  -3   71.16    2.18
   6   3  -3   77.08    2.23
  -6  -3   3   74.19    2.36
  -6  -3   3   74.55    2.10
  -6  -3   3   72.49    2.15
  -6  -3   3   72.96    2.34
   5   3  -3   48.96    1.41
   5   3  -3   46.86    1.63
   5   3  -3   45.58    1.54
   5   3  -3   46.41    1.53
  -5  -3   3   46.26    1.63
  -5  -3   3   46.80    1.51
  -5  -3   3   45.70    1.60
  -5  -3   3   43.03    1.45
   4   3  -3    8.29    0.60
   4   3  -3    8.72    0.63
   4   3  -3    8.45    0.51
   4   3  -3    8.91    0.63
  -4  -3   3    8.60    0.63
  -4  -3   3    9.26    0.72
  -4  -3   3    9.48    0.62
  -4  -3   3    8.30    0.61
  -4  -3   3    8.62    0.63
  -4  -3   3    8.97    0.35
   3   3  -3    7.70    0.54
   3   3  -3    6.94    0.47
   3   3  -3    5.71    0.49
   3   3  -3    6.79    0.48
   3   3  -3    6.74    0.53
  -3  -3   3    6.36    0.55
  -3  -3   3    7.10    0.39
  -3  -3   3    7.21    0.56
  -3  -3   3    8.15    0.65
  -3  -3   3    6.42    0.50
  -3  -3   3    6.71    0.52
  -3  -3   3    6.59    0.52
   2   3  -3    2.92    0.35
   2   3  -3    3.61    0.42
   2   3  -3    3.21    0.35
   2   3  -3    2.80    0.35
   2   3  -3    2.99    0.27
  -2  -3   3    2.87    0.32
  -2  -3   3    3.79    0.43
  -2  -3   3    2.78    0.35
  -2  -3   3    3.57    0.44
  -2  -3   3    2.96    0.33
  -2  -3   3    3.10    0.37
   1   3  -3    0.38    0.12
   1   3  -3    0.31    0.22
   1   3  -3    0.59    0.28
  -1  -3   3    0.68    0.19
  -1  -3   3    0.32    0.28
  -1  -3   3    0.69    0.26
  -1  -3   3    0.62    0.27
  -1  -3   3    0.43    0.24
  -1  -3   3   -0.08    0.26
  -1  -3   3    0.44    0.32
   0   3  -3   51.47    1.33
   0   3  -3   52.22    1.64
   0  -3   3   51.15    1.39
   0  -3   3   49.71    1.39
   0  -3   3   51.59    1.57
   0  -3   3   52.53    1.39
   0  -3   3   49.42    1.46
   0  -3   3   52.86    1.34
  -1   3  -3    6.61    0.49
   1  -3   3    5.80    0.52
   1  -3   3    5.55    0.35
   1  -3   3    5.44    0.35
   1  -3   3    4.82    0.35
   1  -3   3    5.69    0.54
   1  -3   3    6.46    0.50
   1  -3   3    4.50    0.40
  -2   3  -3  162.36    4.01
   2  -3   3  161.29    4.08
   2  -3   3  159.34    3.71
   2  -3   3  158.86    3.65
   2  -3   3  158.28    3.69
   2  -3   3  152.60    4.04
   2  -3   3  157.81    3.96
  -3   3  -3   96.96    2.69
   3  -3   3   93.02    2.67
   3  -3   3   92.98    2.58
   3  -3   3   92.07    2.21
   3  -3   3   91.21    2.23
   3  -3   3   93.67    2.65
  -4   3  -3    1.76    0.49
   4  -3   3    2.26    0.44
   4  -3   3    1.29    0.43
   4  -3   3    1.67    0.41
   4  -3   3    1.68    0.17
   4  -3   3    1.07    0.41
  -5   3  -3    9.02    0.92
   5  -3   3    7.52    0.81
   5  -3   3    8.77    0.78
   5  -3   3    8.25    0.38
   5  -3   3    8.55    0.87
   5  -3   3    8.34    0.79
   5  -3   3    8.27    0.36
  -6   3  -3    0.62    0.51
   6  -3   3    0.29    0.17
   6  -3   3    0.08    0.17
   6  -3   3   -0.30    0.40
   6  -3   3   -0.08    0.47
   6  -3   3    0.17    0.40
   6  -3   3   -0.21    0.36
  -7   3  -3    0.59    0.67
   7  -3   3    0.10    0.59
   7  -3   3    0.48    0.21
   7  -3   3    0.33    0.20
   7  -3   3    1.43    0.52
   7  -3   3    0.73    0.53
  -8   3  -3   19.75    1.54
   8  -3   3   17.40    1.34
   8  -3   3   17.19    0.68
   8  -3   3   17.52    1.55
   8  -3   3   16.53    0.72
   8  -3   3   16.60    1.56
  -9   3  -3    8.85    1.26
   9  -3   3   10.31    1.32
   9  -3   3   13.26    1.46
 -10   3  -3    6.96    1.28
  10  -3   3    5.39    1.22
  10  -3   3    7.35    1.27
  12   2  -3    0.69    0.89
  12   2  -3   -0.47    0.76
  12   2  -3    0.55    0.48
 -12  -2   3    0.86    0.92
  11   2  -3   27.02    1.43
  11   2  -3   27.27    1.91
  11   2  -3   21.98    1.67
 -11  -2   3   25.80    1.88
  10   2  -3   15.14    1.50
  10   2  -3   13.54    1.01
  10   2  -3   16.00    1.46
 -10  -2   3   13.42    1.44
   9   2  -3    2.27    0.50
   9   2  -3    1.71    0.72
   9   2  -3    2.99    0.77
  -9  -2   3    1.23    0.71
   8   2  -3   17.08    1.27
   8   2  -3   19.08    1.02
   8   2  -3   18.43    1.00
   8   2  -3   19.38    1.22
   8   2  -3   18.37    1.22
  -8  -2   3   19.17    1.30
   7   2  -3    0.36    0.32
   7   2  -3    0.45    0.32
   7   2  -3   -0.12    0.39
   7   2  -3    0.40    0.31
  -7  -2   3    0.37    0.43
  -7  -2   3    0.19    0.20
   6   2  -3    0.21    0.28
   6   2  -3    0.27    0.28
   6   2  -3    0.53    0.26
   6   2  -3    0.42    0.26
   6   2  -3    0.39    0.39
  -6  -2   3    0.20    0.29
  -6  -2   3    1.09    0.43
  -6  -2   3    0.02    0.35
  -6  -2   3   -0.08    0.21
   5   2  -3   26.20    1.01
   5   2  -3   26.50    0.92
   5   2  -3   27.34    1.14
   5   2  -3   27.29    1.04
   5   2  -3   27.29    1.01
  -5  -2   3   25.09    1.13
  -5  -2   3   26.75    0.94
  -5  -2   3   26.64    1.03
  -5  -2   3   24.45    1.15
   4   2  -3    1.87    0.34
   4   2  -3    2.20    0.29
   4   2  -3    1.88    0.35
   4   2  -3    1.63    0.31
   4   2  -3    2.39    0.39
  -4  -2   3    2.42    0.42
  -4  -2   3    1.61    0.40
  -4  -2   3    2.53    0.34
  -4  -2   3    2.37    0.37
   3   2  -3   18.87    0.65
   3   2  -3   17.96    0.79
   3   2  -3   19.20    0.75
   3   2  -3   18.42    0.77
   3   2  -3   19.06    0.76
  -3  -2   3   19.06    0.78
  -3  -2   3   17.90    0.76
  -3  -2   3   18.48    0.73
  -3  -2   3   17.82    0.51
  -3  -2   3   19.04    0.83
  -3  -2   3   19.22    0.76
   2   2  -3  289.49    6.59
   2   2  -3  281.77    6.53
   2   2  -3  278.86    6.60
   2   2  -3  277.35    6.57
   2   2  -3  279.64    6.50
  -2  -2   3  280.62    6.45
  -2  -2   3  280.19    6.52
  -2  -2   3  285.82    6.57
  -2  -2   3  287.16    6.60
  -2  -2   3  286.07    6.57
  -2  -2   3  288.07    6.58
  -2  -2   3  277.22    6.61
   1   2  -3   28.20    0.91
   1   2  -3   29.71    0.89
   1   2  -3   28.97    0.77
   1   2  -3   28.62    0.88
  -1  -2   3   28.89    0.79
  -1  -2   3   27.30    0.86
  -1  -2   3   29.14    0.88
  -1  -2   3   27.72    0.88
  -1  -2   3   30.20    0.90
   0   2  -3   80.34    2.13
   0   2  -3   79.39    1.88
   0   2  -3   79.02    1.91
   0   2  -3   81.53    1.91
   0  -2   3   79.08    1.86
   0  -2   3   78.40    1.97
   0  -2   3   75.23    2.04
   0  -2   3   75.89    1.93
   0  -2   3   78.06    2.04
   0  -2   3   80.58    1.94
   0  -2   3   79.27    1.94
  -1   2  -3    1.02    0.25
   1  -2   3    1.23    0.24
   1  -2   3    0.91    0.16
   1  -2   3    0.79    0.16
   1  -2   3    1.13    0.29
   1  -2   3    0.68    0.27
   1  -2   3    0.81    0.16
  -2   2  -3    0.48    0.26
   2  -2   3    0.48    0.24
   2  -2   3    0.59    0.14
   2  -2   3    0.70    0.14
   2  -2   3    0.74    0.25
   2  -2   3    0.83    0.28
  -3   2  -3   51.50    1.64
   3  -2   3   50.81    1.57
   3  -2   3   50.18    1.26
   3  -2   3   51.91    1.66
   3  -2   3   50.86    1.59
   3  -2   3   50.71    1.27
  -4   2  -3   39.16    1.50
   4  -2   3   39.60    1.46
   4  -2   3   39.58    1.06
   4  -2   3   43.84    1.57
   4  -2   3   43.00    1.41
   4  -2   3   38.94    1.38
   4  -2   3   38.95    1.06
  -5   2  -3   19.37    1.10
   5  -2   3   17.21    0.62
   5  -2   3   18.81    1.03
   5  -2   3   18.40    0.94
   5  -2   3   18.27    0.63
   5  -2   3   18.01    1.08
   5  -2   3   18.77    0.94
  -6   2  -3   37.35    1.72
   6  -2   3   36.92    1.46
   6  -2   3   41.21    1.66
   6  -2   3   41.18    1.52
   6  -2   3   41.66    1.75
   6  -2   3   38.72    1.15
   6  -2   3   39.82    1.16
  -7   2  -3   12.97    1.20
   7  -2   3   12.63    1.10
   7  -2   3   12.15    0.62
   7  -2   3   11.81    0.61
   7  -2   3   12.89    0.90
   7  -2   3   12.71    1.17
  -8   2  -3   20.25    1.41
   8  -2   3   17.42    1.39
   8  -2   3   18.24    0.82
   8  -2   3   19.86    1.30
  -9   2  -3    1.65    0.78
   9  -2   3    1.81    0.78
   9  -2   3    1.56    0.36
   9  -2   3    0.67    0.75
 -10   2  -3   -0.03    0.79
  10  -2   3    0.00    0.32
  10  -2   3    0.26    0.74
  10  -2   3    1.90    0.91
 -11   2  -3    3.67    1.15
  11  -2   3    2.96    0.45
  11  -2   3    2.04    1.04
  11  -2   3    1.72    0.96
  12   1  -3    1.32    0.90
  12   1  -3    4.05    0.71
  12   1  -3    2.94    1.10
 -12  -1   3    4.76    1.19
  11   1  -3   -0.35    0.78
  11   1  -3   -0.60    0.64
  11   1  -3   -0.36    0.40
 -11  -1   3    0.07    0.81
  10   1  -3    2.55    0.57
  10   1  -3    3.07    0.87
  10   1  -3    4.71    0.92
 -10  -1   3    2.84    0.91
   9   1  -3    2.74    0.75
   9   1  -3    0.97    0.45
   9   1  -3    1.24    0.67
  -9  -1   3    1.13    0.63
   8   1  -3   11.82    0.80
   8   1  -3   10.90    1.05
   8   1  -3   14.13    1.30
  -8  -1   3   11.44    1.20
   7   1  -3   61.53    1.91
   7   1  -3   62.60    1.91
   7   1  -3   63.65    2.20
   7   1  -3   63.61    1.90
  -7  -1   3   58.64    2.24
   6   1  -3    5.71    0.34
   6   1  -3    5.59    0.65
   6   1  -3    5.69    0.51
   6   1  -3    5.77    0.51
   6   1  -3    5.00    0.48
   6   1  -3    5.63    0.51
  -6  -1   3    6.37    0.78
   5   1  -3   79.87    2.33
   5   1  -3   78.85    2.10
   5   1  -3   79.68    1.91
   5   1  -3   75.28    2.13
   5   1  -3   77.55    2.11
   5   1  -3   80.70    2.13
  -5  -1   3   77.59    2.40
  -5  -1   3   76.68    1.94
   4   1  -3   23.59    0.86
   4   1  -3   25.98    0.89
   4   1  -3   25.04    0.83
   4   1  -3   25.43    0.90
   4   1  -3   25.86    1.03
  -4  -1   3   25.38    0.79
  -4  -1   3   25.06    1.06
  -4  -1   3   26.07    0.95
  -4  -1   3   24.86    1.04
   3   1  -3    2.31    0.28
   3   1  -3    2.53    0.24
   3   1  -3    1.94    0.29
   3   1  -3    1.56    0.33
   3   1  -3    2.43    0.28
  -3  -1   3    1.89    0.26
  -3  -1   3    2.45    0.37
  -3  -1   3    1.75    0.32
  -3  -1   3    1.47    0.30
   2   1  -3   43.14    1.19
   2   1  -3   44.64    1.23
   2   1  -3   43.97    1.19
   2   1  -3   43.80    1.09
   2   1  -3   42.62    1.20
   2   1  -3   43.42    1.25
  -2  -1   3   43.54    1.05
  -2  -1   3   43.59    1.18
  -2  -1   3   44.51    1.24
  -2  -1   3   42.65    1.24
   1   1  -3    0.99    0.16
   1   1  -3    0.81    0.15
   1   1  -3    1.36    0.19
   1   1  -3    1.03    0.18
  -1  -1   3    1.00    0.17
  -1  -1   3    1.03    0.14
  -1  -1   3    1.22    0.21
  -1  -1   3    1.03    0.20
  -1  -1   3    1.23    0.15
  -1  -1   3    1.07    0.18
   0   1  -3  134.14    3.05
   0   1  -3  132.11    3.05
   0   1  -3  128.54    3.14
   0  -1   3  133.97    3.11
   0  -1   3  130.72    3.04
   0  -1   3  128.87    3.07
   0  -1   3  134.71    3.06
   0  -1   3  133.59    3.07
  -1   1  -3  517.57   11.58
   1  -1   3  514.76   11.50
   1  -1   3  502.74   11.53
   1  -1   3  518.85   11.59
   1  -1   3  515.28   11.62
   1  -1   3  501.27   11.50
   1  -1   3  508.32   11.47
  -2   1  -3   46.57    1.39
   2  -1   3   48.51    1.20
   2  -1   3   47.33    1.19
   2  -1   3   48.19    1.36
   2  -1   3   49.18    1.42
   2  -1   3   49.14    1.33
  -3   1  -3   66.20    1.92
   3  -1   3   66.77    1.96
   3  -1   3   67.90    1.82
   3  -1   3   65.49    1.62
   3  -1   3   64.16    1.89
   3  -1   3   65.98    1.57
   3  -1   3   65.23    1.62
  -4   1  -3   15.66    0.88
   4  -1   3   15.10    0.72
   4  -1   3   15.31    0.52
   4  -1   3   15.08    0.56
   4  -1   3   15.75    0.56
   4  -1   3   16.52    0.90
   4  -1   3   14.82    0.79
  -5   1  -3    1.58    0.47
   5  -1   3    1.29    0.23
   5  -1   3    1.62    0.40
   5  -1   3    1.30    0.44
   5  -1   3    1.11    0.22
   5  -1   3    1.59    0.26
   5  -1   3    1.06    0.32
  -6   1  -3    0.17    0.39
   6  -1   3    0.01    0.40
   6  -1   3   -0.25    0.33
   6  -1   3   -0.06    0.19
   6  -1   3   -0.16    0.25
   6  -1   3    0.01    0.21
  -7   1  -3   13.90    1.23
   7  -1   3   12.84    0.97
   7  -1   3   15.71    1.28
   7  -1   3   12.37    0.95
   7  -1   3   12.43    0.66
   7  -1   3   12.06    0.81
   7  -1   3   12.44    0.67
  -8   1  -3    4.62    0.93
   8  -1   3    4.12    0.82
   8  -1   3    3.61    0.46
   8  -1   3    4.99    0.75
  -9   1  -3   31.98    1.91
   9  -1   3   30.91    1.23
   9  -1   3   34.16    1.87
 -10   1  -3    9.22    1.33
  10  -1   3   15.07    1.54
  10  -1   3   13.60    1.53
  10  -1   3   11.82    0.84
 -11   1  -3    4.86    1.17
  11  -1   3    6.95    1.23
  11  -1   3    3.78    1.15
  11  -1   3    5.88    0.66
  12   0  -3   10.42    1.60
  12   0  -3   10.48    0.93
 -12   0   3    9.46    1.53
  11   0  -3   -0.41    0.82
  11   0  -3    2.41    0.85
  11   0  -3    0.74    0.45
 -11   0   3   -0.06    0.79
  10   0  -3   24.68    1.20
  10   0  -3   27.92    1.87
  10   0  -3   24.61    1.70
 -10   0   3   23.03    1.78
   9   0  -3   18.25    1.35
   9   0  -3   18.43    1.59
   9   0  -3   18.49    0.98
  -9   0   3   18.25    1.61
   8   0  -3   -0.20    0.31
   8   0  -3    0.09    0.49
   8   0  -3    0.55    0.58
  -8   0   3   -0.60    0.42
   7   0  -3    7.55    0.68
   7   0  -3    7.15    0.57
   7   0  -3    6.22    0.86
   7   0  -3    7.75    0.86
   7   0  -3    7.46    0.61
  -7   0   3    5.16    0.84
   6   0  -3    5.30    0.45
   6   0  -3    6.86    0.73
   6   0  -3    5.52    0.46
   6   0  -3    5.99    0.57
   6   0  -3    6.18    0.50
   6   0  -3    5.87    0.47
  -6   0   3    5.24    0.71
   5   0  -3   20.82    0.78
   5   0  -3   20.91    0.98
   5   0  -3   19.96    0.76
   5   0  -3   20.84    0.86
   5   0  -3   20.44    0.76
   5   0  -3   19.64    0.75
  -5   0   3   19.07    1.07
   4   0  -3   70.84    1.87
   4   0  -3   71.24    1.85
   4   0  -3   71.39    2.07
   4   0  -3   74.16    1.88
   4   0  -3   73.46    1.95
  -4   0   3   72.32    2.17
   3   0  -3    9.86    0.54
   3   0  -3   10.23    0.44
   3   0  -3   10.78    0.45
   3   0  -3   10.41    0.46
   3   0  -3   10.17    0.48
  -3   0   3   10.74    0.63
   2   0  -3  200.04    4.58
   2   0  -3  201.22    4.58
   2   0  -3  198.39    4.66
   2   0  -3  199.66    4.57
   2   0  -3  195.71    4.74
   2   0  -3  196.89    4.58
  -2   0   3  201.92    4.70
  -2   0   3  198.86    4.51
  -2   0   3  197.36    4.74
   1   0  -3  222.99    5.06
   1   0  -3  229.56    5.07
   1   0  -3  219.25    5.07
   1   0  -3  209.46    5.06
   1   0  -3  231.80    5.15
  -1   0   3  226.36    5.14
  -1   0   3  217.71    5.04
  -1   0   3  222.66    5.07
  -1   0   3  224.35    5.14
   0   0  -3    0.24    0.09
   0   0  -3    0.55    0.11
   0   0  -3    0.22    0.08
   0   0  -3    0.34    0.10
   0   0   3    0.18    0.08
   0   0   3    0.54    0.11
   0   0   3    0.25    0.09
   0   0   3    0.32    0.08
   0   0   3    0.33    0.10
  -1   0  -3   26.89    0.75
  -1   0  -3   27.84    0.68
  -1   0  -3   27.73    0.75
  -1   0  -3   26.00    0.70
  -1   0  -3   27.13    0.78
   1   0   3   27.64    0.77
   1   0   3   28.25    0.78
   1   0   3   26.76    0.73
   1   0   3   27.80    0.67
   1   0   3   26.66    0.71
   1   0   3   26.50    0.72
   1   0   3   26.88    0.71
  -2   0  -3   21.67    0.79
  -2   0  -3   22.05    0.79
  -2   0  -3   24.22    0.72
  -2   0  -3   22.62    0.62
   2   0   3   22.69    0.67
   2   0   3   22.78    0.70
   2   0   3   23.66    0.80
   2   0   3   23.77    0.84
   2   0   3   23.39    0.68
   2   0   3   23.95    0.66
  -3   0  -3   13.51    0.70
   3   0   3   13.34    0.51
   3   0   3   13.02    0.68
   3   0   3   13.49    0.52
   3   0   3   12.50    0.64
   3   0   3   14.18    0.55
   3   0   3   13.27    0.49
  -4   0  -3  144.26    3.75
   4   0   3  139.64    3.74
   4   0   3  144.87    3.66
   4   0   3  144.26    3.45
   4   0   3  145.57    3.49
   4   0   3  142.37    3.43
   4   0   3  142.04    3.45
  -5   0  -3   78.90    2.47
   5   0   3   81.51    2.14
   5   0   3   82.18    2.14
   5   0   3   80.97    2.16
   5   0   3   83.73    2.49
   5   0   3   81.43    2.11
   5   0   3   81.78    2.37
  -6   0  -3   34.08    1.47
   6   0   3   30.12    1.05
   6   0   3   31.42    1.08
   6   0   3   29.08    1.06
   6   0   3   32.52    1.30
   6   0   3   33.75    1.45
   6   0   3   31.31    1.08
  -7   0  -3   61.48    2.27
   7   0   3   61.26    2.10
   7   0   3   63.42    2.27
   7   0   3   59.49    1.81
   7   0   3   62.17    1.83
  -8   0  -3   10.08    1.08
   8   0   3   13.49    0.99
   8   0   3   11.52    0.76
   8   0   3   10.09    1.06
  -9   0  -3    0.17    0.67
   9   0   3    0.60    0.53
   9   0   3   -0.22    0.57
   9   0   3    0.02    0.34
 -10   0  -3    1.11    0.81
  10   0   3    1.49    0.48
  10   0   3    0.88    0.76
 -11   0  -3    0.37    0.80
  11   0   3    0.26    0.44
  11   0   3   -0.11    0.77
  11   0   3    0.14    0.81
 -12   0  -3   14.16    1.74
  12   0   3   11.93    1.00
  12   0   3   11.49    1.53
  12   0   3   12.96    1.68
  11  -1  -3    2.39    0.52
  11  -1  -3    2.12    1.04
 -11   1   3   -0.07    0.89
  10  -1  -3    1.03    0.86
  10  -1  -3    1.67    0.44
  10  -1  -3    2.63    0.83
 -10   1   3    1.75    0.95
   9  -1  -3   23.51    1.66
   9  -1  -3   19.82    0.97
   9  -1  -3   19.66    1.47
  -9   1   3   21.05    1.76
   8  -1  -3    0.56    0.64
   8  -1  -3    1.04    0.34
   8  -1  -3    0.94    0.59
  -8   1   3    0.20    0.65
   7  -1  -3   32.79    1.50
   7  -1  -3   30.50    1.07
   7  -1  -3   31.32    1.63
   7  -1  -3   31.29    1.35
   7  -1  -3   31.17    1.09
  -7   1   3   30.75    1.62
   6  -1  -3   98.10    2.53
   6  -1  -3   99.08    2.83
   6  -1  -3  101.68    2.73
   6  -1  -3  100.37    2.53
   6  -1  -3   99.33    3.12
   6  -1  -3   99.61    2.97
  -6   1   3   95.11    3.10
   5  -1  -3    4.73    0.51
   5  -1  -3    4.33    0.34
   5  -1  -3    4.84    0.34
   5  -1  -3    5.51    0.51
   5  -1  -3    4.52    0.34
   5  -1  -3    4.89    0.59
  -5   1   3    3.43    0.58
   4  -1  -3   34.19    0.92
   4  -1  -3   33.64    0.95
   4  -1  -3   35.06    1.24
   4  -1  -3   32.81    1.16
   4  -1  -3   33.11    0.94
   3  -1  -3    0.14    0.13
   3  -1  -3    0.29    0.23
   3  -1  -3    0.04    0.14
   3  -1  -3    0.39    0.25
  -3   1   3    0.29    0.33
   2  -1  -3    0.57    0.23
   2  -1  -3    0.38    0.26
   2  -1  -3    0.60    0.13
   2  -1  -3    0.66    0.11
  -2   1   3    0.67    0.31
   1  -1  -3    3.48    0.33
   1  -1  -3    3.46    0.20
   1  -1  -3    3.22    0.19
   1  -1  -3    3.18    0.30
  -1   1   3    3.99    0.36
   0  -1  -3  147.59    3.32
   0  -1  -3  143.96    3.33
   0  -1  -3  142.43    3.30
   0  -1  -3  147.58    3.44
   0  -1  -3  142.44    3.38
   0  -1  -3  143.60    3.31
   0   1   3  137.47    3.31
   0   1   3  146.59    3.37
   0   1   3  146.02    3.30
   0   1   3  144.51    3.35
  -1  -1  -3   61.19    1.49
  -1  -1  -3   61.53    1.52
  -1  -1  -3   60.90    1.50
  -1  -1  -3   59.91    1.50
  -1  -1  -3   59.67    1.49
   1   1   3   60.49    1.51
   1   1   3   60.19    1.47
   1   1   3   60.92    1.50
   1   1   3   60.28    1.50
  -2  -1  -3   64.45    1.65
  -2  -1  -3   64.20    1.70
  -2  -1  -3   63.74    1.51
  -2  -1  -3   65.27    1.64
  -2  -1  -3   62.83    1.71
   2   1   3   64.88    1.56
   2   1   3   65.62    1.72
   2   1   3   65.60    1.69
   2   1   3   63.97    1.65
   2   1   3   65.55    1.65
   2   1   3   62.78    1.64
  -3  -1  -3   24.93    0.81
  -3  -1  -3   24.63    0.94
  -3  -1  -3   27.09    0.99
  -3  -1  -3   26.87    0.90
  -3  -1  -3   27.98    0.72
   3   1   3   26.69    0.74
   3   1   3   26.23    0.85
   3   1   3   26.20    0.90
   3   1   3   28.02    0.99
   3   1   3   24.78    0.85
   3   1   3   27.35    0.86
  -4  -1  -3   30.83    1.09
  -4  -1  -3   29.69    0.92
  -4  -1  -3   31.82    1.19
   4   1   3   30.14    1.00
   4   1   3   32.34    1.02
   4   1   3   31.29    0.87
   4   1   3   30.21    0.99
   4   1   3   30.73    1.15
   4   1   3   30.29    1.08
  -5  -1  -3   22.34    0.69
  -5  -1  -3   19.52    1.00
  -5  -1  -3   21.83    0.96
   5   1   3   20.66    0.82
   5   1   3   21.52    0.70
   5   1   3   23.57    1.05
   5   1   3   20.24    0.82
   5   1   3   19.81    0.83
   5   1   3   19.53    0.92
  -6  -1  -3    4.66    0.66
   6   1   3    4.75    0.47
   6   1   3    4.39    0.46
   6   1   3    4.69    0.55
   6   1   3    3.93    0.59
   6   1   3    5.25    0.37
   6   1   3    5.20    0.48
  -7  -1  -3   20.14    1.23
   7   1   3   17.78    0.88
   7   1   3   18.20    0.90
   7   1   3   18.72    0.90
   7   1   3   18.23    1.16
   7   1   3   18.78    1.00
  -8  -1  -3   29.28    1.60
   8   1   3   29.18    1.56
   8   1   3   29.09    1.35
   8   1   3   30.59    1.24
  -9  -1  -3    3.61    0.85
   9   1   3    3.28    0.76
   9   1   3    2.85    0.52
   9   1   3    3.05    0.64
 -10  -1  -3   41.11    2.19
  10   1   3   39.94    1.63
  10   1   3   40.21    2.09
 -11  -1  -3   11.04    1.43
  11   1   3    8.52    1.22
  11   1   3    7.86    1.30
  11   1   3    8.13    0.86
 -12  -1  -3    3.01    1.09
  12   1   3    1.67    0.99
  12   1   3    4.02    0.71
  12   1   3    1.49    0.93
  11  -2  -3   16.38    1.86
  11  -2  -3   14.83    0.79
 -11   2   3   17.30    1.87
  10  -2  -3    1.58    1.15
  10  -2  -3    0.17    0.30
  10  -2  -3   -0.55    0.74
 -10   2   3    0.31    0.82
   9  -2  -3   14.56    1.40
   9  -2  -3   15.50    1.60
   9  -2  -3   17.59    0.80
  -9   2   3   15.64    1.57
   8  -2  -3    7.97    1.11
   8  -2  -3    7.12    0.95
   8  -2  -3    9.16    0.58
  -8   2   3    9.23    1.21
   7  -2  -3    0.47    0.59
   7  -2  -3    0.36    0.47
   7  -2  -3    0.47    0.24
   7  -2  -3    0.16    0.24
   7  -2  -3   -0.24    0.37
  -7   2   3   -0.28    0.59
   6  -2  -3    0.84    0.40
   6  -2  -3    2.55    0.66
   6  -2  -3    1.61    0.25
   6  -2  -3    1.71    0.50
   6  -2  -3    1.05    0.23
   6  -2  -3    1.90    0.47
  -6   2   3    1.24    0.52
   5  -2  -3    5.50    0.70
   5  -2  -3    5.62    0.60
   5  -2  -3    5.02    0.31
   5  -2  -3    4.56    0.56
   5  -2  -3    4.78    0.62
   5  -2  -3    4.50    0.32
  -5   2   3    5.18    0.73
   4  -2  -3   24.01    0.67
   4  -2  -3   23.19    0.67
   4  -2  -3   22.83    1.03
   4  -2  -3   27.16    1.19
   4  -2  -3   25.12    1.08
  -4   2   3   22.80    1.18
   3  -2  -3  145.66    3.78
   3  -2  -3  145.38    3.73
  -3   2   3  147.32    3.87
   2  -2  -3   23.13    0.94
   2  -2  -3   22.92    0.87
   1  -2  -3  121.00    3.05
   1  -2  -3  122.11    3.06
   1  -2  -3  122.06    2.95
   1  -2  -3  120.90    2.79
   1  -2  -3  118.97    2.79
  -1   2   3  118.93    3.06
   0  -2  -3   86.61    2.08
   0  -2  -3   86.02    2.27
   0  -2  -3   88.40    2.09
   0  -2  -3   88.36    2.10
   0  -2  -3   86.42    2.10
   0  -2  -3   87.71    2.24
   0   2   3   87.75    2.18
   0   2   3   85.11    2.19
   0   2   3   87.73    2.07
  -1  -2  -3    3.98    0.31
  -1  -2  -3    4.49    0.36
  -1  -2  -3    4.53    0.27
  -1  -2  -3    5.51    0.40
  -1  -2  -3    4.48    0.36
  -1  -2  -3    4.31    0.34
   1   2   3    4.59    0.35
   1   2   3    4.03    0.31
   1   2   3    3.83    0.32
   1   2   3    4.68    0.37
  -2  -2  -3   19.23    0.63
  -2  -2  -3   19.09    0.73
  -2  -2  -3   17.95    0.71
  -2  -2  -3   20.08    0.73
  -2  -2  -3   19.03    0.69
   2   2   3   19.74    0.73
   2   2   3   18.27    0.70
   2   2   3   18.18    0.69
   2   2   3   18.74    0.61
  -3  -2  -3    6.33    0.53
  -3  -2  -3    7.33    0.50
  -3  -2  -3    5.69    0.49
  -3  -2  -3    5.45    0.41
  -3  -2  -3    5.00    0.33
  -3  -2  -3    5.63    0.46
   3   2   3    5.56    0.42
   3   2   3    5.88    0.50
   3   2   3    5.43    0.42
   3   2   3    5.16    0.30
   3   2   3    5.32    0.45
  -4  -2  -3    3.70    0.39
  -4  -2  -3    2.72    0.40
  -4  -2  -3    3.06    0.46
  -4  -2  -3    2.65    0.40
  -4  -2  -3    3.76    0.30
   4   2   3    2.87    0.37
   4   2   3    3.59    0.38
   4   2   3    3.22    0.22
   4   2   3    3.12    0.39
   4   2   3    2.59    0.39
   4   2   3    2.72    0.46
  -5  -2  -3  103.42    2.52
  -5  -2  -3   99.18    2.87
  -5  -2  -3  101.65    2.90
  -5  -2  -3   98.81    2.79
  -5  -2  -3  105.13    2.63
   5   2   3  100.53    2.71
   5   2   3   98.84    2.86
   5   2   3  105.48    2.70
   5   2   3   99.63    2.73
   5   2   3  101.26    2.38
   5   2   3  102.50    2.69
  -6  -2  -3   27.53    1.27
  -6  -2  -3   25.91    1.19
  -6  -2  -3   28.38    0.95
   6   2   3   25.88    1.09
   6   2   3   26.62    1.08
   6   2   3   25.88    1.04
   6   2   3   24.55    1.22
   6   2   3   26.12    1.05
  -7  -2  -3   24.10    1.17
  -7  -2  -3   20.54    0.78
   7   2   3   21.51    1.06
   7   2   3   21.52    1.01
   7   2   3   19.66    0.97
   7   2   3   21.48    1.18
  -8  -2  -3   22.79    1.39
   8   2   3   25.40    1.15
   8   2   3   22.11    1.36
   8   2   3   20.70    1.15
   8   2   3   23.06    1.11
  -9  -2  -3    0.30    0.58
   9   2   3    0.62    0.44
   9   2   3    0.73    0.65
   9   2   3    1.12    0.44
 -10  -2  -3    0.65    0.72
  10   2   3    0.97    0.74
  10   2   3   -0.09    0.43
 -11  -2  -3    5.53    1.13
  11   2   3    6.70    1.13
  11   2   3    5.90    0.80
 -12  -2  -3    1.12    0.92
  12   2   3    0.44    0.88
  12   2   3    0.52    0.48
  12   2   3    0.09    0.83
  10  -3  -3    0.11    0.85
  10  -3  -3    0.80    0.91
 -10   3   3    0.46    0.87
   9  -3  -3    3.29    0.96
   9  -3  -3    3.02    0.96
   9  -3  -3    3.33    0.85
  -9   3   3    3.08    0.99
   8  -3  -3   27.66    1.80
   8  -3  -3   24.14    1.53
  -8   3   3   24.86    1.72
   7  -3  -3   10.36    1.04
   7  -3  -3    8.15    1.07
   7  -3  -3    8.65    0.99
   7  -3  -3    7.41    0.92
  -7   3   3    7.63    1.04
   6  -3  -3   34.33    1.49
   6  -3  -3   34.95    1.57
   6  -3  -3   34.40    1.70
   6  -3  -3   34.87    1.59
  -6   3   3   32.91    1.71
   5  -3  -3   25.02    1.18
   5  -3  -3   23.76    1.30
   5  -3  -3   25.60    1.24
   5  -3  -3   25.07    1.22
  -5   3   3   22.15    1.32
   4  -3  -3    2.78    0.51
   4  -3  -3    2.81    0.52
   4  -3  -3    2.58    0.48
  -4   3   3    3.12    0.59
   3  -3  -3    4.73    0.54
   3  -3  -3    3.74    0.55
  -3   3   3    4.42    0.59
   2  -3  -3    2.82    0.21
   2  -3  -3    2.48    0.37
   2  -3  -3    3.24    0.22
   2  -3  -3    2.88    0.46
   2  -3  -3    2.93    0.46
  -2   3   3    3.35    0.51
   1  -3  -3    1.53    0.36
   1  -3  -3    1.92    0.38
   1  -3  -3    1.62    0.17
   1  -3  -3    1.10    0.19
   1  -3  -3    1.77    0.20
   1  -3  -3    1.56    0.28
  -1   3   3    1.16    0.37
   0  -3  -3   55.07    1.46
   0  -3  -3   56.98    1.45
   0  -3  -3   57.63    1.43
   0  -3  -3   52.90    1.65
   0  -3  -3   56.00    1.66
   0  -3  -3   53.86    1.46
   0  -3  -3   54.07    1.64
   0   3   3   55.99    1.39
   0   3   3   57.50    1.65
  -1  -3  -3   31.01    1.06
  -1  -3  -3   29.81    1.02
  -1  -3  -3   28.81    0.96
  -1  -3  -3   31.49    0.98
  -1  -3  -3   30.91    0.82
  -1  -3  -3   33.00    1.08
  -1  -3  -3   32.28    0.98
   1   3   3   31.36    1.05
   1   3   3   32.89    0.97
   1   3   3   31.59    1.02
  -2  -3  -3   66.65    1.86
  -2  -3  -3   68.19    1.85
  -2  -3  -3   67.43    1.90
  -2  -3  -3   72.67    1.87
  -2  -3  -3   69.05    1.86
   2   3   3   68.72    1.88
   2   3   3   66.98    1.84
   2   3   3   68.01    1.85
   2   3   3   66.48    1.87
  -3  -3  -3   73.63    2.01
  -3  -3  -3   74.97    2.04
  -3  -3  -3   72.88    2.07
  -3  -3  -3   74.12    1.94
  -3  -3  -3   74.38    2.07
   3   3   3   72.20    2.02
   3   3   3   73.96    2.03
   3   3   3   74.96    2.04
  -4  -3  -3    7.35    0.58
  -4  -3  -3    7.07    0.63
  -4  -3  -3    7.24    0.47
  -4  -3  -3    6.54    0.60
  -4  -3  -3    6.62    0.53
  -4  -3  -3    6.91    0.54
   4   3   3    8.30    0.61
   4   3   3    8.63    0.69
   4   3   3    6.29    0.53
   4   3   3    7.88    0.60
  -5  -3  -3    4.46    0.60
  -5  -3  -3    2.90    0.46
  -5  -3  -3    3.62    0.52
  -5  -3  -3    2.53    0.39
  -5  -3  -3    3.48    0.37
   5   3   3    3.17    0.46
   5   3   3    3.91    0.48
   5   3   3    2.91    0.49
   5   3   3    3.00    0.44
  -6  -3  -3   11.55    0.82
  -6  -3  -3   12.69    0.59
  -6  -3  -3   11.15    0.86
  -6  -3  -3   12.30    0.69
   6   3   3   13.47    0.77
   6   3   3   12.89    0.77
   6   3   3   11.96    0.77
   6   3   3   12.35    0.77
   6   3   3   11.24    0.83
  -7  -3  -3    1.83    0.54
  -7  -3  -3    2.72    0.41
  -7  -3  -3    2.61    0.34
  -7  -3  -3    2.97    0.56
   7   3   3    2.61    0.48
   7   3   3    3.70    0.63
   7   3   3    1.77    0.45
   7   3   3    3.23    0.52
  -8  -3  -3   34.13    1.56
  -8  -3  -3   34.48    1.19
  -8  -3  -3   34.85    1.66
   8   3   3   32.09    1.41
   8   3   3   33.60    1.64
   8   3   3   32.85    1.41
   8   3   3   34.29    1.43
  -9  -3  -3   40.91    1.83
  -9  -3  -3   39.34    1.92
   9   3   3   37.48    1.61
   9   3   3   38.92    1.61
   9   3   3   42.31    1.67
   9   3   3   38.22    1.89
 -10  -3  -3    0.53    0.64
  10   3   3    0.02    0.42
  10   3   3   -0.56    0.62
 -11  -3  -3   13.39    1.47
  11   3   3   13.76    1.44
  11   3   3   14.17    1.19
 -12  -3  -3    5.33    1.21
  12   3   3    4.60    1.12
  12   3   3    4.35    1.10
  12   3   3    3.42    0.70
 -13  -3  -3    0.52    0.93
  13   3   3    1.36    0.99
  13   3   3    0.04    0.53
  13   3   3    1.67    0.99
   9  -4  -3    3.72    1.05
   9  -4  -3    4.14    1.10
  -9   4   3    4.27    1.09
   8  -4  -3    1.28    0.82
   8  -4  -3    1.38    0.70
   8  -4  -3    1.33    0.80
   8  -4  -3    1.18    0.69
  -8   4   3    1.89    0.86
   7  -4  -3   -0.27    0.52
   7  -4  -3    0.92    0.58
   7  -4  -3    0.85    0.68
   7  -4  -3   -0.39    0.57
   7  -4  -3    0.98    0.55
   7  -4  -3   -0.40    0.51
  -7   4   3   -0.20    0.65
   6  -4  -3   -0.11    0.41
   6  -4  -3    0.06    0.48
   6  -4  -3    0.86    0.56
   6  -4  -3    0.22    0.52
   6  -4  -3    0.56    0.59
   6  -4  -3    1.28    0.54
   6  -4  -3   -0.18    0.45
[truncated: 15,503,521 more chars]
